# Supplementary material for: HDAC4 Does Not Act as a Protein Deacetylase in the Postnatal Murine Brain In Vivo
Source: PLoS One. 2013 Nov 22;8(11):e80849. doi: 10.1371/journal.pone.0080849 (PMC3838388; doi:10.1371/journal.pone.0080849)
Supplement: Table S1 — Summary data table of all acetylated peptides identified in the AcetylScan study. The Details tab is a redundant list of all identifications with accompanying scoring metrics and links to labelled MS/MS spectra. The Summary tab is a non-redundant list of proteins/sites identified in the study with relative fold changes. (XLSX) [file pone.0080849.s001.xlsx]

## Sheet: Column Definitions
Column Name	Definition	In Details	In Summary
Accession	is the UniProt accession number for the assigned protein	Y	Y
Calculated m/z	is the calculated, accurate mass-to-charge ratio of the identified peptide from the primary amino acid sequence and associated modifications	Y	Y
Charge	is the observed charge state for the identified peptide	Y	Y
Count in Details	is the number of times the designated modification site is represented from all peptide assignments in the Details tab. These redundant assignments can be as a result of multiple MS/MS spectra for the same peptide ion or from distinct peptide ions due to multiple charge states, presence of oxidized methionine and overlapping sequence		Y
Delta Cn	is the delta Xcorr value. In general, a Delta Cn of 0.1 or greater is good	Y
Description	is the FASTA database description of the protein entry	Y	Y
Fold Change	is the relative fold-change between the integrated peak area of the experimental (numerator) and control (denominator) conditions. A negative value indicates the peptide is more abundant in the control condition		Y
Gene Name	is the gene name for the assigned protein. In some cases, the Gene Name is hyperlinked (when in blue text) when there are siRNA products available at CST	Y	Y
kD	is the translated molecular weight of the assigned protein	Y
Mass Accuracy (ppm)	is the mass measurement error obtained between the observed and theoretical mass of the assigned peptide	Y
MS2 Spectrum Number	is the spectrum number of the MS2 channel of the raw LC-MS/MS data file	Y
Peak Apex MS Spectrum Number	is the spectrum number that is referenced for the corresponding apex peak intensity measurement of the parent ion from the MS channel of the raw LC-MS/MS data file	Y
Peptide	is the amino acid sequence for the peptide assignment	Y	Y
Raw Intensity	is the parent ion intensity observed during the MS at its chromatographic apex. A blank intensity value indicates that a chromatographic peak corresponding to that peptide was not found.		Y
Retention Time	is the corresponding apex retention time of the parent ion from the MS channel of the raw LC-MS/MS data file		Y
Site	is the site of modification for the peptide assignment. In some cases, the site is hyperlinked (when in blue text) when there are site-specific antibodies available at CST	Y	Y
Species	indicates the origin(s) of the identified peptide	Y	Y
URL	is the URL address for the PhosphoSitePlus web site for the protein assignment	Y	Y
Xcorr	is the primary SEQUEST score for the identified peptide, which is based on the correlation of the experimental MS/MS spectrum and a theoretical MS/MS spectrum derived from the assigned sequence	Y
PP Probability	is the peptide prophet probability score. The closer to 1, the higher confidence in the assignment of the peptide sequence to the MS/MS spectrum	Y

## Sheet: Details
MIELCAREK ET AL. ACETYLSCAN® RESULTS
Supplemental Table #S1: Mouse Brain; Trypsin Digest; Acetyl-lysine Antibody (#9895)
Samples: Mouse Brain Pool 1 = CS 10558, 10559; Mouse Brain Pool 2 = CS 10560, 10561; Mouse Brain HDAC4 KO Pool 1 = CS 10562, 10563; Mouse Brain HDAC4 KO Pool 2 = CS 10564, 10565
Legend: * -acetylation, # - oxidized methionine, § - published site, Blue Text - CST siRNA/antibody available, – - no Fold Change determined, Bold Intensity = manually reviewed values. Red m/z and intensity = multiple identifications for one m/z
														MS2 Spectrum Number								Peak Apex MS Spectrum Number								Xcorr								Mass Accuracy (ppm)								DeltaCN
Index	Index in Detail	Protein Type	Gene Name	Protein Name	Site	Description	Accession	URL	kD	-7/+7 peptide	Peptide	Charge	Calc. m/z	Control Pool 1 (CS10558)	Control Pool 1 (CS10559)	Control Pool 2 (CS10560)	Control Pool 2 (CS10561)	HDAC4 KO Pool 1 (CS10562)	HDAC4 KO Pool 1 (CS10563)	HDAC4 KO Pool 2 (CS10564)	HDAC4 KO Pool 2 (CS10565)	Control Pool 1 (CS10558)	Control Pool 1 (CS10559)	Control Pool 2 (CS10560)	Control Pool 2 (CS10561)	HDAC4 KO Pool 1 (CS10562)	HDAC4 KO Pool 1 (CS10563)	HDAC4 KO Pool 2 (CS10564)	HDAC4 KO Pool 2 (CS10565)	Control Pool 1 (CS10558)	Control Pool 1 (CS10559)	Control Pool 2 (CS10560)	Control Pool 2 (CS10561)	HDAC4 KO Pool 1 (CS10562)	HDAC4 KO Pool 1 (CS10563)	HDAC4 KO Pool 2 (CS10564)	HDAC4 KO Pool 2 (CS10565)	Control Pool 1 (CS10558)	Control Pool 1 (CS10559)	Control Pool 2 (CS10560)	Control Pool 2 (CS10561)	HDAC4 KO Pool 1 (CS10562)	HDAC4 KO Pool 1 (CS10563)	HDAC4 KO Pool 2 (CS10564)	HDAC4 KO Pool 2 (CS10565)	Control Pool 1 (CS10558)	Control Pool 1 (CS10559)	Control Pool 2 (CS10560)	Control Pool 2 (CS10561)
1	Absent in database
2	1										EESEAAAAAEK*MEELHSLDPRR	5	503.041		7195																2.551								1.2343								0.048
3	2										K*GDYPM#SK	2	492.229	2483								2466								1.671								-0.2782								0.09
4	3										RYPLPVLTK*AGGRR	3	542.658	4191							4563									3.074							3.418	-0.8978							-1.1038	0.002
5	4										SIILSDVLFK*PQYMSLMSNNLLC	3	910.13	12570																1.853								0.9638								0.036
6	5										SKPVNK*NCYISK	3	493.926								7822																1.818								-2.2714
7	6										SSHFK*IEQIKLDK	3	538.966							8933																2.807								2.8794
8	Activator protein
9	7	Activator protein	Ahsa2	AHSA2	304	activator of 90 kDa heat shock protein ATPase homolog 2	Q8N9S3	http://www.phosphosite.org/proteinAction.do?id=4852966&showAllSites=true	38	CKGVPVCK*EENMKFC	GVPVCK*EENMK	2	666.818			3601			3611	3940				3580			3604	3955				2.278			2.151	2.761				0.47			0.3567	0.3266				0.167
10	Adaptor/scaffold
11	8	Adaptor/scaffold	Akap2; Akap2; Akap2	AKAP2; AKAP2 iso3; AKAP2 iso6	175; 175; 216	A-kinase anchor protein 2 isoform 2	O54931; O54931-3; A2API8	http://www.phosphosite.org/proteinAction.do?id=4359&showAllSites=true	99; 87; 102	FTLTTLKK*EAKFELR; FTLTTLKK*EAKFELR; FTLTTLKK*EAKFELR	TLKK*EAK	2	430.266	3442																1.55								0.194								0.026
12	9	Adaptor/scaffold	Ank2; Ank2	ANK2; ANK2 iso2	3387; 3415	ankyrin-2 isoform 3	Q8C8R3; Q8C8R3-2	http://www.phosphosite.org/proteinAction.do?id=24583&showAllSites=true	426; 429	ESEDGATK*PKLFASR; ESEDGATK*PKLFASR	ERAEGFESESEDGATK*PK	3	670.308	3299	3230			3314	3256	3557		3294	3231			3317	3251	3561		3.392	3.605			3.717	3.48	4.102		0.8326	0.3502			0.2312	0.7708	0.4174		0.267	0.409
13	10	Adaptor/scaffold	Ap2m1	AP2M1	256	AP-2 complex subunit mu	P84091	http://www.phosphosite.org/proteinAction.do?id=11190&showAllSites=true	50	HQCVRLSK*FDSERSI	LSK*FDSER	2	512.259		3698								3308								1.994								-0.9425								0.152
14	11	Adaptor/scaffold	Basp1	BASP1	159	brain acid soluble protein 1	Q91XV3	http://www.phosphosite.org/proteinAction.do?id=15794&showAllSites=true	22	AAAGPEAK*SDAAPAA	KTEAPAAAGPEAK*	2	641.836	2313				2368				2334				2360				2.605				2.406				-1.2294				0.379				0.14
15	12	Adaptor/scaffold	Basp1	BASP1	170	brain acid soluble protein 1	Q91XV3	http://www.phosphosite.org/proteinAction.do?id=15794&showAllSites=true	22	APAASDSK*PSSAEPA	SDAAPAASDSK*PSSAEPAPSSK	2	1050.49	2768			2734	2829	2758	3022		2774			2729	2822	2763			2.433			2.355	1.518	1.929	0.931		1.07			0.9795	1.3262	1.3548	1.051		0.348			0.424
16	13	Adaptor/scaffold	Basp1	BASP1	170	brain acid soluble protein 1	Q91XV3	http://www.phosphosite.org/proteinAction.do?id=15794&showAllSites=true	22	APAASDSK*PSSAEPA	SDAAPAASDSK*PSSAEPAPSSK	3	700.662	2764		2703	2721				3058	2774		2713	2729				3088	4.398		4.05	4.111				4.027	0.6529		0.439	0.761				0.179	0.285		0.362	0.311
17	14	Adaptor/scaffold	Chn1	ARHGAP2	44	N-chimaerin isoform 3	Q91V57	http://www.phosphosite.org/proteinAction.do?id=5154642&showAllSites=true	53	CEVENRPK*YYGREYH	RVTCTCEVENRPK*YYGR	3	744.021		3033		3024		3051	3340	3453		3035		3031		3042	3363			2.593		2.805		2.839	2.953	2.638		0.5321		0.8128		0.624	-0.1683	0.7298		0.058		0.091
18	15	Adaptor/scaffold	Chn1	ARHGAP2	44	N-chimaerin isoform 3	Q91V57	http://www.phosphosite.org/proteinAction.do?id=5154642&showAllSites=true	53	CEVENRPK*YYGREYH	VTCTCEVENRPK*YYGR	3	691.987			3645								3635								1.859								0.6204								0.147
19	16	Adaptor/scaffold	Diap1; Rpl6	diaphanous 1; RPL6	462, 464; 84, 86	protein diaphanous homolog 1	O08808; P47911	http://www.phosphosite.org/proteinAction.do?id=7968&showAllSites=true	139; 34	LVDQMIDK*TKVEKSE, DQMIDKTK*VEKSEAK; KRKYSAAK*TKVEKKK, KYSAAKTK*VEKKKKK	K*TK*VEK	2	408.745			1564		1640														1.78		1.995						0.229		0.4004						0.07
20	17	Adaptor/scaffold	Erc1; Erc1	ERC1; ERC1 iso2	10; 10	ELKS/Rab6-interacting/CAST family member 1 isoform 1	Q99MI1; Q99MI1-2	http://www.phosphosite.org/proteinAction.do?id=12141&showAllSites=true	128; 112	GSARSVGK*VEPSSQS; GSARSVGK*VEPSSQS	SVGK*VEPSSQSPGR	2	728.873	2571																2.368								1.3159								0.266
21	18	Adaptor/scaffold	G3bp2; G3bp2	G3BP-2; G3BP-2 iso2	210; 210	ras GTPase-activating protein-binding protein 2 isoform a	P97379; P97379-2	http://www.phosphosite.org/proteinAction.do?id=4379&showAllSites=true	54; 51	ETKTEELK*PQVEEKH; ETKTEELK*PQVEEKH	TEELK*PQVEEK	2	686.354		4095	4097	4135	4222	4164		4548		4085	4092	4127	4212	4156		4551		2.978	2.676	3.093	3.061	2.514		3.356		0.6481	-0.2187	0.0817	0.1466	0.6656		0.2989		0.311	0.268	0.317
22	19	Adaptor/scaffold	Pik3ap1	BCAP	206	phosphoinositide 3-kinase adapter protein 1	Q9EQ32	http://www.phosphosite.org/proteinAction.do?id=1112&showAllSites=true	91	VRCKLDEK*VSTEAEF	K*VSTEAEFSPEDSPSIR	3	640.978		6992																2.433								-0.244								0.058
23	20	Adaptor/scaffold	Spna2; Spna2; Spna2	SPTAN1; SPTAN1 iso2; SPTAN1 iso3	1313; 1293; 1293	spectrin alpha chain, brain isoform 1	P16546; P16546-2; E9Q447	http://www.phosphosite.org/proteinAction.do?id=3309&showAllSites=true	285; 282; 285	SAEDLKEK*CTELNQA; SAEDLKEK*CTELNQA; SAEDLKEK*CTELNQA	LIQSHPESAEDLKEK*	3	589.304					3914																2.76								-0.9224
24	21	Adaptor/scaffold	Strap	STRAP	317	serine-threonine kinase receptor-associated protein	Q9Z1Z2	http://www.phosphosite.org/proteinAction.do?id=4434&showAllSites=true	38	EDSGELAK*PKIGFPE	CVLPEEDSGELAK*PK	2	857.422							7064	7127							7057	7120							3.224	3.37							0.5987	0.3239
25	22	Adaptor/scaffold	Synrg; Synrg	synergin, gamma; synergin, gamma iso2	§509; §430	synergin gamma isoform 1	Q5SV85; Q5SV85-2	http://www.phosphosite.org/proteinAction.do?id=9911&showAllSites=true	140; 122	GTKASTDK*YAVFKGI; GTKASTDK*YAVFKGI	ASTDK*YAVFK	2	586.303				6296	6414							6294								1.847	1.867							0.0156	-0.6211							0.095
26	23	Adaptor/scaffold	Synrg; Synrg	synergin, gamma; synergin, gamma iso2	§736; §657	synergin gamma isoform 1	Q5SV85; Q5SV85-2	http://www.phosphosite.org/proteinAction.do?id=9911&showAllSites=true	140; 122	HPPAAATK*YDVFKQL; HPPAAATK*YDVFKQL	ASDKYEALREEVSPSPLSSSTVEGAQHPPAAATK*YDVFK	5	841.819			8914								8907								3.497								1.9946								0.149
27	24	Adaptor/scaffold	Ywhae	14-3-3 epsilon	142	14-3-3 protein epsilon	P62259	http://www.phosphosite.org/proteinAction.do?id=9697&showAllSites=true	29	FATGNDRK*EAAENSL	YLAEFATGNDRK*EAAENSLVAYK	3	868.098				8789								8769								3.091								0.6281								0.213
28	25	Adaptor/scaffold	Ywhae	14-3-3 epsilon	§69	14-3-3 protein epsilon	P62259	http://www.phosphosite.org/proteinAction.do?id=9697&showAllSites=true	29	IISSIEQK*EENKGGE	IISSIEQK*EENKGGEDKLK	3	729.722		4202	4189	4202	4330	4254		4643										2.31	2.181	2.973	2.767	2.347		2.476		0.8141	0.9215	0.8621	0.4982	0.8456		-0.3824		0.192	0.061	0.164
29	26	Adaptor/scaffold	Ywhae	14-3-3 epsilon	73	14-3-3 protein epsilon	P62259	http://www.phosphosite.org/proteinAction.do?id=9697&showAllSites=true	29	IEQKEENK*GGEDKLK	IISSIEQKEENK*GGEDKLK	3	729.722							4181								4560								3.155								-0.5996
30	27	Adaptor/scaffold	Ywhae	14-3-3 epsilon	78	14-3-3 protein epsilon	P62259	http://www.phosphosite.org/proteinAction.do?id=9697&showAllSites=true	29	ENKGGEDK*LKMIREY	IISSIEQKEENKGGEDK*LK	3	729.722								4297																2.449								0.5942
31	28	Adaptor/scaffold	Ywhag	14-3-3 gamma	77	14-3-3 protein gamma	P61982	http://www.phosphosite.org/proteinAction.do?id=6878&showAllSites=true	28	TSADGNEK*KIEMVRA	TSADGNEK*KIEMVR	2	810.407	3875	3808	3806	3840	3935	3866	4178		3895	3810	3800	3841	3937	3868	4175		3.858	3.589	3.151	3.394	3.53	3.415	4.179		0.3732	-0.1133	0.438	-0.3503	0.6158	0.2658	0.2238		0.428	0.408	0.33	0.424
32	29	Adaptor/scaffold	Ywhag	14-3-3 gamma	77	14-3-3 protein gamma	P61982	http://www.phosphosite.org/proteinAction.do?id=6878&showAllSites=true	28	TSADGNEK*KIEMVRA	TSADGNEK*KIEMVR	3	540.607	3897	3803	3791	3833	3950		4187	4279	3887	3821	3811	3841	3937		4175	4289	2.175	2.587	2.479	2.465	2.342		2.254	2.409	-0.2127	-0.2596	-0.1201	0.0491	0.0491		-0.2182	-0.3442	0.253	0.141	0.151	0.07
33	30	Adaptor/scaffold	Ywhag	14-3-3 gamma	77	14-3-3 protein gamma	P61982	http://www.phosphosite.org/proteinAction.do?id=6878&showAllSites=true	28	TSADGNEK*KIEMVRA	TSADGNEK*KIEM#VR	2	818.404		2755		2749						2748		2751						2.536		3.064						0.7653		1.0282						0.264		0.278
34	31	Adaptor/scaffold	Ywhag	14-3-3 gamma	77	14-3-3 protein gamma	P61982	http://www.phosphosite.org/proteinAction.do?id=6878&showAllSites=true	28	TSADGNEK*KIEMVRA	TSADGNEK*KIEM#VR	3	545.938		2738		2732														2.198		2.069						-0.313		0.0556						0.15		0.007
35	32	Adaptor/scaffold	Ywhag	14-3-3 gamma	78	14-3-3 protein gamma	P61982	http://www.phosphosite.org/proteinAction.do?id=6878&showAllSites=true	28	SADGNEKK*IEMVRAY	TSADGNEKK*IEMVR	2	810.407								4272								4289								3.929								0.1973
36	33	Adaptor/scaffold	Ywhah	14-3-3 eta	77	14-3-3 protein eta	P68510	http://www.phosphosite.org/proteinAction.do?id=3577&showAllSites=true	28	TMADGNEK*KLEKVKA	TMADGNEK*KLEK	2	703.353	2216	2180	2156	2192	2262	2190	2473	2527	2263	2211	2186	2212	2283	2214	2500	2576	3.2	3.562	3.335	3.884	3.445	3.048	3.225	3.4	0.2162	0.1443	0.3542	0.4616	0.4083	0.362	-0.0669	-0.3117	0.41	0.354	0.341	0.4
37	34	Adaptor/scaffold	Ywhah	14-3-3 eta	77	14-3-3 protein eta	P68510	http://www.phosphosite.org/proteinAction.do?id=3577&showAllSites=true	28	TMADGNEK*KLEKVKA	TMADGNEK*KLEK	2	703.353								2605								2576								3.116								-0.3124
38	35	Adaptor/scaffold	Ywhah	14-3-3 eta	77	14-3-3 protein eta	P68510	http://www.phosphosite.org/proteinAction.do?id=3577&showAllSites=true	28	TMADGNEK*KLEKVKA	TM#ADGNEK*KLEK	2	711.351	1657	1617	1607	1602	1671	1594		1879	1665	1623	1605	1610	1677	1603		1894	3.295	3.528	3.312	3.478	3.412	2.966		3.24	0.2365	0.3807	0.4461	0.6853	0.8154	0.7303		-0.2158	0.282	0.328	0.358	0.354
39	36	Adaptor/scaffold	Ywhah	14-3-3 eta	77	14-3-3 protein eta	P68510	http://www.phosphosite.org/proteinAction.do?id=3577&showAllSites=true	28	TMADGNEK*KLEKVKA	TM#ADGNEK*KLEK	2	711.351			2174	2205		2220					1605	1610		1603					2.729	2.752		2.665					0.9083	-0.0793		0.5657					0.268	0.289
40	37	Adaptor/scaffold	Ywhah	14-3-3 eta	77	14-3-3 protein eta	P68510	http://www.phosphosite.org/proteinAction.do?id=3577&showAllSites=true	28	TMADGNEK*KLEKVKA	TM#ADGNEK*KLEK	3	474.57	1655	2203	1596	2202	1667	1628	1816	1876	1665	1623	1605	1610	1677		1826		1.901	2.246	2.219	2.474	2.248	1.88	2.134	1.895	-0.1173	0.1767	0.0825	0.2119	0.29	0.2077	-0.2924	-0.4247	0.116	0.046	0.177	0.095
41	38	Adaptor/scaffold	Ywhah	14-3-3 eta	77	14-3-3 protein eta	P68510	http://www.phosphosite.org/proteinAction.do?id=3577&showAllSites=true	28	TMADGNEK*KLEKVKA	TM#ADGNEK*KLEK	3	474.57		1613		1594						1623		1610						2.174		2.242						-0.1257		0.2534						0.18		0.227
42	39	Adaptor/scaffold	Ywhah	14-3-3 eta	78	14-3-3 protein eta	P68510	http://www.phosphosite.org/proteinAction.do?id=3577&showAllSites=true	28	MADGNEKK*LEKVKAY	TM#ADGNEKK*LEK	2	711.351		2204			2304		1822			1623			1677		1826			1.817			1.78		2.716			0.7676			0.2422		0.328			0.128
43	40	Adaptor/scaffold	Ywhah	14-3-3 eta	78	14-3-3 protein eta	P68510	http://www.phosphosite.org/proteinAction.do?id=3577&showAllSites=true	28	MADGNEKK*LEKVKAY	TM#ADGNEKK*LEK	2	711.351							2498								2500								3.418								0.0255
44	41	Adaptor/scaffold	Ywhah	14-3-3 eta	78	14-3-3 protein eta	P68510	http://www.phosphosite.org/proteinAction.do?id=3577&showAllSites=true	28	MADGNEKK*LEKVKAY	TM#ADGNEKK*LEK	3	474.57					2273																2.074								0.6705
45	42	Adaptor/scaffold	Ywhaz	14-3-3 zeta	§115	14-3-3 protein zeta/delta	P63101	http://www.phosphosite.org/proteinAction.do?id=3579&showAllSites=true	28	NASQPESK*VFYLKMK	FLIPNASQPESK*VFYLK	2	1012.05	11825						12563		11834						12571		2.167						1.736		0.7462						0.2553		0.331
46	43	Adaptor/scaffold	Ywhaz	14-3-3 zeta	§115	14-3-3 protein zeta/delta	P63101	http://www.phosphosite.org/proteinAction.do?id=3579&showAllSites=true	28	NASQPESK*VFYLKMK	FLIPNASQPESK*VFYLK	3	675.035			11916	11941			12595				11912	11940							3.801	3.365			2.788				-1.231	-0.9507			-1.0027				0.4	0.197
47	44	Adaptor/scaffold	Ywhaz	14-3-3 zeta	157	14-3-3 protein zeta/delta	P63101	http://www.phosphosite.org/proteinAction.do?id=3579&showAllSites=true	28	QEAFEISK*KEMQPTH	GIVDQSQQAYQEAFEISK*K	3	737.702			10433								10436								4.054								0.2385								0.355
48	45	Adaptor/scaffold	Ywhaz	14-3-3 zeta	§3	14-3-3 protein zeta/delta	P63101	http://www.phosphosite.org/proteinAction.do?id=3579&showAllSites=true	28	-----MDK*NELVQKA	M#DK*NELVQK	2	581.792						2152																2.337								1.0167
49	46	Adaptor/scaffold	Ywhaz	14-3-3 zeta	§68	14-3-3 protein zeta/delta	P63101	http://www.phosphosite.org/proteinAction.do?id=3579&showAllSites=true	28	VVSSIEQK*TEGAEKK	VVSSIEQK*TEGAEK	2	773.902	4605	4533	4506	4539	4656	4582	4907	5022	4608	4547	4510	4545	4669	4585	4901	5023	4.22	3.407	3.723	4.579	3.85	3.523	3.69	3.616	0.1524	0.839	0.5933	0.8028	0.8713	-0.3273	0.3114	0.3864	0.322	0.294	0.346	0.319
50	Adhesion or extracellular matrix protein
51	47	Adhesion or extracellular matrix protein	Acta1; Acta2; Actb; Actbl2; Actc1; Actg1; Actg2	ACTA1; ACTA2; ACTB; ACTBL2; ACTC1; ACTG1; ACTG2	§193; §193; §191; §192; §193; §191; §192	actin, alpha skeletal muscle	P68134; P62737; P60710; Q8BFZ3; P68033; P63260; P63268	http://www.phosphosite.org/proteinAction.do?id=4802&showAllSites=true	42; 42; 42; 42; 42; 42; 42	DLTDYLMK*ILTERGY; DLTDYLMK*ILTERGY; DLTDYLMK*ILTERGY; DLTDYLMK*ILTERGY; DLTDYLMK*ILTERGY; DLTDYLMK*ILTERGY; DLTDYLMK*ILTERGY	DLTDYLM#K*ILTER	2	834.929		15731								15750								2.079								0.4604								0.131
52	48	Adhesion or extracellular matrix protein	Acta1; Acta2; Actb; Actbl2; Actc1; Actg1; Actg2	ACTA1; ACTA2; ACTB; ACTBL2; ACTC1; ACTG1; ACTG2	§193; §193; §191; §192; §193; §191; §192	actin, alpha skeletal muscle	P68134; P62737; P60710; Q8BFZ3; P68033; P63260; P63268	http://www.phosphosite.org/proteinAction.do?id=4802&showAllSites=true	42; 42; 42; 42; 42; 42; 42	DLTDYLMK*ILTERGY; DLTDYLMK*ILTERGY; DLTDYLMK*ILTERGY; DLTDYLMK*ILTERGY; DLTDYLMK*ILTERGY; DLTDYLMK*ILTERGY; DLTDYLMK*ILTERGY	DLTDYLM#K*ILTER	3	556.955	15702	15721	15727	15684	15872	15858	16428	16428	15717	15739	15740	15691	15878	15887		16419	2.858	3.542	1.978	3.745	2.949	2.873	2.111	2.095	0.0955	0.7277	0.6473	0.437	0.5569	0.2884	0.5	0.3208	0.262	0.204	0.107	0.201
53	49	Adhesion or extracellular matrix protein	Acta1; Acta2; Actb; Actbl2; Actc1; Actg1; Actg2	ACTA1; ACTA2; ACTB; ACTBL2; ACTC1; ACTG1; ACTG2	§330; §330; §328; §329; §330; §328; §329	actin, alpha skeletal muscle	P68134; P62737; P60710; Q8BFZ3; P68033; P63260; P63268	http://www.phosphosite.org/proteinAction.do?id=4802&showAllSites=true	42; 42; 42; 42; 42; 42; 42	APSTMKIK*IIAPPER; APSTMKIK*IIAPPER; APSTMKIK*IIAPPER; APSTMKIK*IIAPPER; APSTMKIK*IIAPPER; APSTMKIK*IIAPPER; APSTMKIK*IIAPPER	IK*IIAPPERK	3	402.924			4364								4323								2.08								0.5814								0.111
54	50	Adhesion or extracellular matrix protein	Acta1; Acta2; Actc1; Actg2	ACTA1; ACTA2; ACTC1; ACTG2	§70; §70; §70; §69	actin, alpha skeletal muscle	P68134; P62737; P68033; P63268	http://www.phosphosite.org/proteinAction.do?id=4802&showAllSites=true	42; 42; 42; 42	KRGILTLK*YPIEHGI; KRGILTLK*YPIEHGI; KRGILTLK*YPIEHGI; KRGILTLK*YPIEHGI	GILTLK*YPIEHGIITNWDDM#EK	3	882.116			12381	12412			13071	12996			12385	12413				13020			3.099	2.703			2.336	2.882			0.1667	0.3471			0.2321	0.0162			0.326	0.185
55	51	Adhesion or extracellular matrix protein	Actl7a	AL7A	§281	actin-like protein 7A	Q9QY84	http://www.phosphosite.org/proteinAction.do?id=3488&showAllSites=true	49	LGIVEDIK*TRCCFVA	IVEDIK*TR	2	508.293	4261	4210	4184	4213	4328	4252	4598	4687									2.129	2.741	1.993	2.243	2.172	2.433	2.606	2.26	-0.0525	-0.0919	0.1149	0.3207	0.109	0.1818	-0.1234	-0.3873	0.092	0.068	0.079	0.067
56	52	Adhesion or extracellular matrix protein	Actr3	Arp3	§244	actin-related protein 3	Q99JY9	http://www.phosphosite.org/proteinAction.do?id=4810&showAllSites=true	47	DLVKEFNK*YDTDGSK	EFNK*YDTDGSK	2	673.299	3664	3582	3574	3585	3689	3602	3971	4067	3671	3585	3580	3588	3697	3626	3988	4070	2.558	2.695	2.884	2.999	2.539	2.315	2.446	2.557	0.2032	0.0821	0.2575	0.4299	0.395	0.4515	0.3467	-0.1022	0.366	0.418	0.413	0.48
57	53	Adhesion or extracellular matrix protein	Anxa2	ANXA2	§227	annexin A2	P07356	http://www.phosphosite.org/proteinAction.do?id=3332&showAllSites=true	39	RSVCHLQK*VFERYKS	SVCHLQK*VFER	2	722.872	5671	5608	5505	5560	5641	5605	5955	6059	5635	5568	5552	5601	5677	5650	5990	6097	3.218	3.439	3.288	3.496	2.794	3.244	3.342	3.122	0.3145	0.239	0.491	0.4979	0.509	0.2861	0.2563	0.1124	0.396	0.485	0.366	0.445
58	54	Adhesion or extracellular matrix protein	Anxa2	ANXA2	§227	annexin A2	P07356	http://www.phosphosite.org/proteinAction.do?id=3332&showAllSites=true	39	RSVCHLQK*VFERYKS	SVCHLQK*VFER	2	722.872	5587	5522	5588						5635	5568	5552						3.195	3.405	3.203						0.4501	0.365	0.3311						0.445	0.419	0.365
59	55	Adhesion or extracellular matrix protein	Anxa2	ANXA2	§227	annexin A2	P07356	http://www.phosphosite.org/proteinAction.do?id=3332&showAllSites=true	39	RSVCHLQK*VFERYKS	SVCHLQK*VFER	3	482.25	5647	5580	5564	5626	5629	5675	5941	6133	5635	5557	5552	5601	5677	5650	5979	6097	4.423	4.355	4.149	3.889	3.444	3.466	3.448	3.944	0.0078	0.0764	0.2065	0.2972	0.2321	0.2231	0.185	-0.0856	0.291	0.355	0.331	0.253
60	56	Adhesion or extracellular matrix protein	Anxa2	ANXA2	§227	annexin A2	P07356	http://www.phosphosite.org/proteinAction.do?id=3332&showAllSites=true	39	RSVCHLQK*VFERYKS	SVCHLQK*VFER	3	482.25	5565	5499	5480	5541	5726	5577	6025	6041	5635	5557	5552	5601	5677	5650	5979	6097	3.378	2.973	3.188	3.121	2.034	3.299	3.416	3.558	0.0078	0.0764	0.2155	0.3034	0.2321	0.2183	0.1899	-0.0738	0.191	0.253	0.319	0.238
61	57	Adhesion or extracellular matrix protein	Arhgdia	RhoGDI alpha	§178	rho GDP-dissociation inhibitor 1	Q99PT1	http://www.phosphosite.org/proteinAction.do?id=5735&showAllSites=true	23	ARGSYNIK*SRFTDDD	GSYNIK*SR	2	483.754			2815								2827								2.526								-0.019								0.175
62	58	Adhesion or extracellular matrix protein	Arpc3	ARPC3	§61	actin-related protein 2/3 complex subunit 3	Q9JM76	http://www.phosphosite.org/proteinAction.do?id=4432&showAllSites=true	21	FFKNYEIK*NEADRTL	NYEIK*NEADR	2	647.307			3777								3778								2.953								-0.1533								0.289
63	59	Adhesion or extracellular matrix protein	Bicd2	Bicd2	663	protein bicaudal D homolog 2 isoform 1	Q921C5	http://www.phosphosite.org/proteinAction.do?id=4311&showAllSites=true	93	ELGPAVDK*DKEALME	HLQAAVDRTTELSRQRIASQELGPAVDK*DK	4	844.45							16342																2.868								2.2556
64	60	Adhesion or extracellular matrix protein	Cct8	CCT-theta	§318	T-complex protein 1 subunit theta	P42932	http://www.phosphosite.org/proteinAction.do?id=4270&showAllSites=true	60	MLVRLNSK*WDLRRLC	LNSK*WDLR	2	537.291		6771		6814	6920					6778		6811	6917					2.295		2.724	2.312					0.168		0.4083	0.181					0.141		0.184
65	61	Adhesion or extracellular matrix protein	Cfl1; Cfl2; Dstn	cofilin 1; cofilin 2; Destrin	121; 121; 121	cofilin-1	P18760; P45591; Q9R0P5	http://www.phosphosite.org/proteinAction.do?id=1482&showAllSites=true	19; 19; 19	KMIYASSK*DAIKKKL; KMIYASSK*DAIKKKF; KMIYASSK*DAIKKKF	MIYASSK*DAIK	2	634.831	5282	5203	5209				5601	5707	5272	5196	5189				5594	5713	2.703	2.407	2.215				2.907	2.602	0.2015	0.8021	0.7564				0.7383	-0.0673	0.331	0.383	0.278
66	62	Adhesion or extracellular matrix protein	Cfl1	cofilin 1	§132	cofilin-1	P18760	http://www.phosphosite.org/proteinAction.do?id=1482&showAllSites=true	19	KKKLTGIK*HELQANC	KLTGIK*HELQANCYEEVKDR	4	619.068							5888								5869								4.009								0.0879
67	63	Adhesion or extracellular matrix protein	Cfl1	cofilin 1	§144	cofilin-1	P18760	http://www.phosphosite.org/proteinAction.do?id=1482&showAllSites=true	19	ANCYEEVK*DRCTLAE	HELQANCYEEVK*DR	3	611.613	4299	4200	4178	4200	4329	4251	4577	4680	4311	4206	4191	4204	4344	4255	4582	4693	3.634	3.304	4.84	3.934	3.16	3.268	3.755	3.233	0.2256	0.1422	0.7603	0.6741	0.5077	0.5563	0.5383	-0.0139	0.268	0.291	0.337	0.284
68	64	Adhesion or extracellular matrix protein	Cfl1	cofilin 1	§144	cofilin-1	P18760	http://www.phosphosite.org/proteinAction.do?id=1482&showAllSites=true	19	ANCYEEVK*DRCTLAE	HELQANCYEEVK*DR	3	611.613			4183								4191								4.185								0.7603								0.286
69	65	Adhesion or extracellular matrix protein	Cfl1	cofilin 1	§144	cofilin-1	P18760	http://www.phosphosite.org/proteinAction.do?id=1482&showAllSites=true	19	ANCYEEVK*DRCTLAE	LTGIKHELQANCYEEVK*DR	3	782.39	5359			5281			5626		5316						5594		4.287			2.79			4.475		2.9646			2.3058			0.8637		0.298			0.082
70	66	Adhesion or extracellular matrix protein	Cfl1	cofilin 1	44	cofilin-1	P18760	http://www.phosphosite.org/proteinAction.do?id=1482&showAllSites=true	19	LFCLSEDK*KNIILEE	AVLFCLSEDK*K	2	676.35	8617	8597	8603	8650	8763	8729	9195	9214	8656	8593	8588	8637	8743	8741	9213	9221	2.635	2.87	2.926	3.058	2.78	3.095	2.615	2.725	-0.3227	-0.1666	0.6798	0.3372	-0.1081	-0.2583	-0.1769	0.0243	0.245	0.292	0.291	0.358
71	67	Adhesion or extracellular matrix protein	Cfl1	cofilin 1	78	cofilin-1	P18760	http://www.phosphosite.org/proteinAction.do?id=1482&showAllSites=true	19	FVKMLPDK*DCRYALY	MLPDK*DCR	2	538.747								3614																1.54								0.1119
72	68	Adhesion or extracellular matrix protein	Cfl1	cofilin 1	78	cofilin-1	P18760	http://www.phosphosite.org/proteinAction.do?id=1482&showAllSites=true	19	FVKMLPDK*DCRYALY	M#LPDK*DCR	2	546.744	2649																1.786								-0.2931								0.019
73	69	Adhesion or extracellular matrix protein	Clasp2	CLASP2	790	CLIP-associating protein 2 isoform b	Q8BRT1	http://www.phosphosite.org/proteinAction.do?id=6744&showAllSites=true	141	KVKVAILK*YIETLAK	VAILK*YIETLAK	2	702.429			14502	14502	14713						14519	14503	14723						3.075	2.143	2.576						0.6287	1.1273	0.7869						0.31	0.027
74	70	Adhesion or extracellular matrix protein	Cltc	CLTC	§1441	clathrin heavy chain 1	Q68FD5	http://www.phosphosite.org/proteinAction.do?id=4396&showAllSites=true	192	RAVNYFSK*VKQLPLV	AVNYFSK*VK	2	549.303	6682	6606	6599	6648		6718	7118		6699	6613	6619	6668		6728	7123		2.628	2.269	2.172	2.144		2.056	2.063		0.2107	0.2772	0.3054	0.4621		0.1769	0.1924		0.176	0.163	0.187	0.239
75	71	Adhesion or extracellular matrix protein	Cltc	CLTC	798	clathrin heavy chain 1	Q68FD5	http://www.phosphosite.org/proteinAction.do?id=4396&showAllSites=true	192	LYRNNLQK*YIEIYVQ	NNLQK*YIEIYVQK	2	847.959				11310																1.586								0.9211								0.156
76	72	Adhesion or extracellular matrix protein	Cltc	CLTC	798	clathrin heavy chain 1	Q68FD5	http://www.phosphosite.org/proteinAction.do?id=4396&showAllSites=true	192	LYRNNLQK*YIEIYVQ	NNLQK*YIEIYVQK	3	565.642	11255	11236	11271	11308	11473	11408	11997	11899	11251	11240	11274	11302	11489	11399	11988	11898	4.216	4.153	4.389	4.649	3.982	3.324	4.183	3.647	0.9152	0.7412	0.7069	1.1217	0.2043	0.3146	0.894	0.314	0.34	0.181	0.311	0.339
77	73	Adhesion or extracellular matrix protein	Cltc	CLTC	907	clathrin heavy chain 1	Q68FD5	http://www.phosphosite.org/proteinAction.do?id=4396&showAllSites=true	192	YDSRVVGK*YCEKRDP	VVGK*YCEK	2	512.76	2291	2249		2281	2331			2641	2295	2244			2338			2643	1.935	1.942		1.688	1.972			1.783	1.4307	1.705		2.8948	1.0188			0.1432	0.085	0.176		0.138
78	74	Adhesion or extracellular matrix protein	Col15a1	COL15A1	754	collagen alpha-1(XV) chain precursor	O35206	http://www.phosphosite.org/proteinAction.do?id=18095&showAllSites=true	140	PSGPKGEK*GEQGAKG	SGPKGEK*GEQGAK	2	657.836					1712	1641	1873														2.085	1.895	2.035						-0.2628	0.2643	0.5861
79	75	Adhesion or extracellular matrix protein	Copg2	COPG2	471	coatomer subunit gamma-2	Q9QXK3	http://www.phosphosite.org/proteinAction.do?id=10305&showAllSites=true	98	PRTPVPSK*YIRFIFN	TPVPSK*YIR	2	551.816	5325			5287								5304					1.636			2.14					-0.233			-0.0888					0.019			0.145
80	76	Adhesion or extracellular matrix protein	Copg2	COPG2	572	coatomer subunit gamma-2	Q9QXK3	http://www.phosphosite.org/proteinAction.do?id=10305&showAllSites=true	98	YTLEPSEK*PFDMKSI	ALHQYTLEPSEK*PFDM#K	3	698.007						6967	7316							6970	7277							2.831	3.324							0.375	0.9391
81	77	Adhesion or extracellular matrix protein	Crebbp	CBP	§1015	CREB-binding protein	P45481	http://www.phosphosite.org/proteinAction.do?id=1161&showAllSites=true	266	EPEPTESK*GEPRSEM	TEVQTDDAEPEPTESK*GEPR	3	753.008	3687	3620	3621	3619	3723	3652	3952	4031	3704	3640	3657	3665	3741	3692	3977	4059	2.951	3.222	2.909	3.137	3.562	3.38	2.836	3.09	0.3501	0.2496	0.4099	0.6355	0.7272	0.5021	0.289	0.2194	0.166	0.218	0.221	0.275
82	78	Adhesion or extracellular matrix protein	Crebbp	CBP	§1015	CREB-binding protein	P45481	http://www.phosphosite.org/proteinAction.do?id=1161&showAllSites=true	266	EPEPTESK*GEPRSEM	TEVQTDDAEPEPTESK*GEPR	3	753.008				3701								3665								2.458								0.624								0.17
83	79	Adhesion or extracellular matrix protein	Crebbp	CBP	§1217	CREB-binding protein	P45481	http://www.phosphosite.org/proteinAction.do?id=1161&showAllSites=true	266	QTLCCYGK*QLCTIPR	KYEFSPQTLCCYGK*QLCTIPR	3	897.762	10298	10255		10313	10482	10434	10851	10836	10317	10278		10319	10488	10435	10896	10860	3.932	4.267		4.365	4.26	3.854	5.012	4.301	0.9775	0.8891		0.7378	0.6903	1.2606	0.8883	0.6446	0.359	0.46		0.474
84	80	Adhesion or extracellular matrix protein	Crebbp	CBP	§1217	CREB-binding protein	P45481	http://www.phosphosite.org/proteinAction.do?id=1161&showAllSites=true	266	QTLCCYGK*QLCTIPR	KYEFSPQTLCCYGK*QLCTIPR	3	897.762		10285					10892			10278					10896			3.153					2.867			0.8891					0.8883			0.471
85	81	Adhesion or extracellular matrix protein	Crebbp	CBP	§1584, 1588	CREB-binding protein	P45481	http://www.phosphosite.org/proteinAction.do?id=1161&showAllSites=true	266	EGSQGDSK*NAKKKNN, GDSKNAKK*KNNKKTN	KKEESTAASETPEGSQGDSK*NAKK*	3	864.419	1588								1578								2.366								0.8775								0.154
86	82	Adhesion or extracellular matrix protein	Crebbp	CBP	§1592, §1593, §1596, §1598	CREB-binding protein	P45481	http://www.phosphosite.org/proteinAction.do?id=1161&showAllSites=true	266	NAKKKNNK*KTNKNKS, AKKKNNKK*TNKNKSS, KNNKKTNK*NKSSISR, NKKTNKNK*SSISRAN	NNK*K*TNK*NK*SSISR	3	596.318	3174	3138	3096	3115			3444		3173	3145	3091	3119			3440		4.05	3.337	3.655	3.686			3.424		0.1956	0.57	0.8649	0.6002			0.0456		0.439	0.263	0.314	0.319
87	83	Adhesion or extracellular matrix protein	Crebbp	CBP	§1592, §1593, §1596, §1598	CREB-binding protein	P45481	http://www.phosphosite.org/proteinAction.do?id=1161&showAllSites=true	266	NAKKKNNK*KTNKNKS, AKKKNNKK*TNKNKSS, KNNKKTNK*NKSSISR, NKKTNKNK*SSISRAN	NNK*K*TNK*NK*SSISR	3	596.318			3123	3136															2.654	2.238							0.8649	0.6002							0.123	0.175
88	84	Adhesion or extracellular matrix protein	Crebbp; Ep300	CBP; p300	§1628; §1589	CREB-binding protein	P45481; E9PYJ8	http://www.phosphosite.org/proteinAction.do?id=1161&showAllSites=true	266; 263	KLYATMEK*HKEVFFV; KLYATMEK*HKEVFFV	LYATMEK*HK	3	388.202	2765		2695		2804		3051								3061		1.651		1.668		1.799		1.509		0.2235		0.0738		0.2106		-0.1997		0.188		0
89	85	Adhesion or extracellular matrix protein	Crebbp; Ep300	CBP; p300	§1712; §1673	CREB-binding protein	P45481; E9PYJ8	http://www.phosphosite.org/proteinAction.do?id=1161&showAllSites=true	266; 263	VYTCNECK*HHVETRW; VYTCNECK*HHVETRW	FVYTCNECK*HHVETR	3	674.637		2953	2899	2926				3342		2947		2932						2.118	2.452	2.134				1.839		0.2167	0.5733	0.3478				-0.1894		0.169	0.069	0.186
90	86	Adhesion or extracellular matrix protein	Crebbp	CBP	§1742, §1745	CREB-binding protein	P45481	http://www.phosphosite.org/proteinAction.do?id=1161&showAllSites=true	266	NTKSHTHK*MVKWGLG, SHTHKMVK*WGLGLDD	SHTHK*M#VK*WGLGLDDEGSSQGEPQSK	4	735.346			6364			6485					6388			6541					2.654			3.249					-0.0638			1.2587					0.094
91	87	Adhesion or extracellular matrix protein	Crebbp	CBP	§1745, 1763	CREB-binding protein	P45481	http://www.phosphosite.org/proteinAction.do?id=1161&showAllSites=true	266	SHTHKMVK*WGLGLDD, SQGEPQSK*SPQESRR	M#VK*WGLGLDDEGSSQGEPQSK*SPQESR	3	1011.47				8898	9039							8890								3.092	2.165							-0.3918	1.6317							0.335
92	88	Adhesion or extracellular matrix protein	Crebbp; Ep300	CBP; p300	1838; §1799	CREB-binding protein	P45481; E9PYJ8	http://www.phosphosite.org/proteinAction.do?id=1161&showAllSites=true	266; 263	AKHCQENK*CPVPFCL; AKHCQENK*CPVPFCL	HCQENK*CPVPFCLNIK	3	695.994	8335		8315	8363	8472	8442	8862	8895				8384	8490	8455		8869	2.233		2.225	2.599	3.207	3.554	2.397	3.071	0.5056		0.8115	0.926	0.5138	0.7396	0.5622	0.2271	0.014		0.12	0.274
93	89	Adhesion or extracellular matrix protein	Crebbp; Ep300	CBP; p300	1838; §1799	CREB-binding protein	P45481; E9PYJ8	http://www.phosphosite.org/proteinAction.do?id=1161&showAllSites=true	266; 263	AKHCQENK*CPVPFCL; AKHCQENK*CPVPFCL	HCQENK*CPVPFCLNIK	3	695.994					8480	8456							8490	8455							2.736	2.808							0.5138	0.7396
94	90	Adhesion or extracellular matrix protein	Ctnna1; Ctnna2; Ctnna2	CTNNA1; CTNNA2; CTNNA2 iso3	§842; §889; §854	catenin alpha-1	P26231; Q61301; Q61301-3	http://www.phosphosite.org/proteinAction.do?id=3088&showAllSites=true	100; 105; 102	ASYVASTK*YQKSQGM; ASYVASTK*YQKVYGT; ASYVASTK*YQKVYGT	ASYVASTK*YQK	2	644.333	3325		3252	3268	3345	3290	3623	3700	3338		3267	3273	3361	3295	3627	3707	2.946		2.808	3.201	3.468	2.985	2.913	2.715	0.2646		-0.0973	0.5232	0.3229	0.173	0.493	0.0977	0.399		0.31	0.387
95	91	Adhesion or extracellular matrix protein	Dmd	dystrophin	1711, 1715, 1720	dystrophin	P11531	http://www.phosphosite.org/proteinAction.do?id=8496&showAllSites=true	426	LDESEKKK*PQQKEDI, EKKKPQQK*EDILKRL, QQKEDILK*RLKAEMN	EKKK*PQQK*EDILK*R	4	474.274	8517																1.864								-0.7335								0.149
96	92	Adhesion or extracellular matrix protein	Dnahc5	DNAH5	1602	dynein heavy chain 5, axonemal	Q8VHE6	http://www.phosphosite.org/proteinAction.do?id=13197&showAllSites=true	528	NRYNMPFK*AQIQKWV	DSTSEVIASMEDSLM#LLGSLLSNRYNM#PFK*	4	856.41								15013																2.662								0.3002
97	93	Adhesion or extracellular matrix protein	Dnahc6	DNAH6	2676	axonemal dynein heavy chain	E9Q0B6	http://www.phosphosite.org/proteinAction.do?id=5140609&showAllSites=true	475	YLTMLTEK*RKQLVSA	INLYLTMLTEK*R	3	512.953		12222																1.885								0.3244								0.131
98	94	Adhesion or extracellular matrix protein	Dnm1; Dnm1; Dnm1; Dnm1; Dnm3	DYN1; DYN1 iso3; DYN1 iso4; DYN1 iso6; DYN3	§598; §598; §598; §594; §594	dynamin-1	P39053; P39053-3; P39053-4; P39053-6; Q8BZ98	http://www.phosphosite.org/proteinAction.do?id=1528&showAllSites=true	98; 96; 97; 97; 97	TEQRNVYK*DYRQLEL; TEQRNVYK*DYRQLEL; TEQRNVYK*DYRQLEL; TEQRNVYK*DYRQLEL; TEQRNVYK*DYRFLEL	NVYK*DYR	2	500.248		3272	3260	3283	3369					3275	3267	3284	3372					1.629	1.542	1.724	1.615					1.3794	1.9326	2.4709	2.9632					0.268	0.231	0.299
99	95	Adhesion or extracellular matrix protein	Dsp	desmoplakin	537	desmoplakin	E9Q557	http://www.phosphosite.org/proteinAction.do?id=11406&showAllSites=true	333	LAVDLSCK*IEQYYEA	M#LVPSVGLIIPPPNPLAVDLSCK*	3	830.123						14240																2.329								2.0516
100	96	Adhesion or extracellular matrix protein	Dst; Dst; Dst; Macf1; Macf1	BPAG1; BPAG1 iso6; BPAG1 iso9; ACF7; ACF7 iso7	109; 287; 109; 152; 152	dystonin isoform a	Q91ZU6-1; NP_001263693; NP_598594; Q9QXZ0; NP_033730	http://www.phosphosite.org/proteinAction.do?id=12240&showAllSites=true	834; 871; 615; 832; 620	YLKRRQVK*LVNIRND; YLKRRQVK*LVNIRND; YLKRRQVK*LVNIRND; FLKQRQVK*LVNIRND; FLKQRQVK*LVNIRND	QVK*LVNIRNDDITDG	4	436.232							6577																2.265								2.9184
101	97	Adhesion or extracellular matrix protein	Dync1h1	DNCH1	§369	cytoplasmic dynein 1 heavy chain 1	Q9JHU4	http://www.phosphosite.org/proteinAction.do?id=7506&showAllSites=true	532	LRKIRNTK*YPIQRAL	NTK*YPIQR	2	531.291	3287	3247	3214	3243	3311	3253	3597	3698	3294	3231	3223	3251	3317	3262	3605	3674	1.951	2.22	2.35	2.243	2.252	2.323	2.3	1.929	-0.3303	-0.27	-0.0911	-0.0873	0.0418	-0.0873	-0.2173	-0.0063	0.131	0.163	0.169	0.179
102	98	Adhesion or extracellular matrix protein	Dync1h1	DNCH1	§369	cytoplasmic dynein 1 heavy chain 1	Q9JHU4	http://www.phosphosite.org/proteinAction.do?id=7506&showAllSites=true	532	LRKIRNTK*YPIQRAL	NTK*YPIQR	2	531.291			3207			3250					3223			3262					2.27			2.269					-0.0911			-0.0873					0.16
103	99	Adhesion or extracellular matrix protein	Dync1h1	DNCH1	§4281	cytoplasmic dynein 1 heavy chain 1	Q9JHU4	http://www.phosphosite.org/proteinAction.do?id=7506&showAllSites=true	532	RSFDSEFK*LACKVDG	SFDSEFK*LACK	2	687.324			8078								8104								3.474								1.3049								0.256
104	100	Adhesion or extracellular matrix protein	Ep300	p300	§1179	histone acetyltransferase p300	E9PYJ8	http://www.phosphosite.org/proteinAction.do?id=3870&showAllSites=true	263	QTLCCYGK*QLCTIPR	KLEFSPQTLCCYGK*QLCTIPR	3	881.103	10753		10776	10801	10979		11355		10735		10811	10803	10972		11347		2.56		2.685	3.753	2.68		3.654		1.2605		0.6547	1.4062	1.5857		1.142		0.256		0.217	0.39
105	101	Adhesion or extracellular matrix protein	Ep300	p300	§1541, §1545	histone acetyltransferase p300	E9PYJ8	http://www.phosphosite.org/proteinAction.do?id=3870&showAllSites=true	263	NESTDVTK*GDSKNAK, DVTKGDSK*NAKKKNN	EENTSNESTDVTK*GDSK*NAK	3	746.672							2872	2956							2874	2948							3.419	4.302							0.3654	-0.1557
106	102	Adhesion or extracellular matrix protein	Ep300	p300	§1541, §1545	histone acetyltransferase p300	E9PYJ8	http://www.phosphosite.org/proteinAction.do?id=3870&showAllSites=true	263	NESTDVTK*GDSKNAK, DVTKGDSK*NAKKKNN	KREENTSNESTDVTK*GDSK*NAK	3	841.404	1706	1665	1658	1674			1884		1697	1645	1638				1880		5.287	4.209	4.151	2.796			4.904		0.6164	0.1188	1.0918	2.4608			0.6933		0.449	0.31	0.348	0.214
107	103	Adhesion or extracellular matrix protein	Ep300	p300	§1541, §1545	histone acetyltransferase p300	E9PYJ8	http://www.phosphosite.org/proteinAction.do?id=3870&showAllSites=true	263	NESTDVTK*GDSKNAK, DVTKGDSK*NAKKKNN	KREENTSNESTDVTK*GDSK*NAK	4	631.305	1702		1655	1641	1717	1643	1877	1915	1708		1638	1654	1710	1647	1891		3.079		4.095	3.568	3.006	3.775	2.937	2.775	-0.0394		0.8162	1.0037	1.4648	1.1025	-0.0739	-0.3637	0.087		0.113	0.344
108	104	Adhesion or extracellular matrix protein	Ep300	p300	§1541, §1545, §1548	histone acetyltransferase p300	E9PYJ8	http://www.phosphosite.org/proteinAction.do?id=3870&showAllSites=true	263	NESTDVTK*GDSKNAK, DVTKGDSK*NAKKKNN, KGDSKNAK*KKNNKKT	EENTSNESTDVTK*GDSK*NAK*K	3	803.374	3159	3108	3087	3101	3209	3126	3427	3503	3162	3101	3069	3097	3207	3108	3407	3499	4.635	3.287	3.951	3.423	4.133	4.996	4.246	2.839	0.4427	0.5494	1.409	0.304	1.7458	0.277	-0.3285	0.6607	0.396	0.317	0.434	0.416
109	105	Adhesion or extracellular matrix protein	Ep300	p300	§1541, §1545, §1548, §1549	histone acetyltransferase p300	E9PYJ8	http://www.phosphosite.org/proteinAction.do?id=3870&showAllSites=true	263	NESTDVTK*GDSKNAK, DVTKGDSK*NAKKKNN, KGDSKNAK*KKNNKKT, GDSKNAKK*KNNKKTS	EENTSNESTDVTK*GDSK*NAK*K*K	3	860.075	3598	3549	3533	3539	3650	3569	3862	3941	3605	3552	3547	3544	3642	3571	3857	3949	5.888	5.21	5.338	6.184	5.151	6.283	4.936	5.006	0.8173	0.649	1.4294	0.2925	0.8643	0.5869	1.1009	0.7351	0.387	0.339	0.463	0.449
110	106	Adhesion or extracellular matrix protein	Ep300	p300	§1541, §1545, §1548, §1549	histone acetyltransferase p300	E9PYJ8	http://www.phosphosite.org/proteinAction.do?id=3870&showAllSites=true	263	NESTDVTK*GDSKNAK, DVTKGDSK*NAKKKNN, KGDSKNAK*KKNNKKT, GDSKNAKK*KNNKKTS	EENTSNESTDVTK*GDSK*NAK*K*K	3	860.075	3601								3605								4.981								0.8173								0.474
111	107	Adhesion or extracellular matrix protein	Fdps	FDPS	§57	farnesyl pyrophosphate synthase	Q920E5	http://www.phosphosite.org/proteinAction.do?id=10611&showAllSites=true	41	EYNALGGK*YNRGLTV	LKEVLEYNALGGK*YNR	3	637.011			7283					7818			7301					7824			3.509					4.262			0.4918					-0.2924			0.087
112	108	Adhesion or extracellular matrix protein	Fras1	FRAS1	3331	extracellular matrix protein FRAS1 precursor	Q80T14	http://www.phosphosite.org/proteinAction.do?id=10183&showAllSites=true	442	KYLDVKHK*EHPNRIH	YLDVKHK*EHPNRIHISVQIPHQDG	4	726.382				15395																3.109								-0.0896								0.102
113	109	Adhesion or extracellular matrix protein	Fscn1	Fascin	74	fascin	Q61553	http://www.phosphosite.org/proteinAction.do?id=4519&showAllSites=true	55	GRYLAADK*DGNVTCE	YLAADK*DGNVTCER	2	827.38	4297	4201	4186	4218	4340	4253	4580	4689	4300	4206	4213	4215	4344	4255	4571	4693	4.168	4.181	4.617	4.764	4.895	4.472	4.439	3.97	0.817	1.1115	0.4167	0.4645	0.6404	0.7825	0.7577	0.0182	0.512	0.511	0.475	0.469
114	110	Adhesion or extracellular matrix protein	Gm5620; Tuba1a; Tuba1b; Tuba1c; Tuba3a; Tuba3b; Tuba4a; Tuba8	TUBA3C; TUBA1A; TUBA1B; TUBA1C; TUBA3D; TUBA3E; TUBA4A; TUBA8	310; §311; §311; §311; 311; 311; §311; 311	PREDICTED: tubulin alpha-1B chain	XP_486246; P68369; P05213; P68373; P05214; NP_033475; P68368; Q9JJZ2	http://www.phosphosite.org/proteinAction.do?id=25230&showAllSites=true	50; 50; 50; 50; 50; 50; 50; 50	KCDPRHGK*YMACCLL; KCDPRHGK*YMACCLL; KCDPRHGK*YMACCLL; KCDPRHGK*YMACCLL; KCDPRHGK*YMACCML; KCDPRHGK*YMACCML; KCDPRHGK*YMACCLL; KCDPRHGK*YMACCML	HGK*YMAC	2	454.691	2595	2540	2520	2568	2648	2559	2889										1.631	1.676	1.732	1.788	1.669	1.77	1.718		0.0544	-0.1052	0.2052	0.2328	0.1678	0.2856	-0.0711		0.044	0.3	0.137	0.224
115	111	Adhesion or extracellular matrix protein	Gm5620; Tuba1a; Tuba1b; Tuba1c; Tuba4a	TUBA3C; TUBA1A; TUBA1B; TUBA1C; TUBA4A	310; §311; §311; §311; §311	PREDICTED: tubulin alpha-1B chain	XP_486246; P68369; P05213; P68373; P68368	http://www.phosphosite.org/proteinAction.do?id=25230&showAllSites=true	50; 50; 50; 50; 50	KCDPRHGK*YMACCLL; KCDPRHGK*YMACCLL; KCDPRHGK*YMACCLL; KCDPRHGK*YMACCLL; KCDPRHGK*YMACCLL	HGK*YMACCLLYR	2	807.373	6921	6869	6860	6908	7026	6965	7368	7465	6940	6888	6861	6910	7027	7003	7365	7439	3.531	3.571	3.207	3.566	4.002	3.623	3.761	3.88	0.2812	0.6288	0.6462	1.3074	0.6108	0.5582	0.3202	0.164	0.442	0.431	0.38	0.461
116	112	Adhesion or extracellular matrix protein	Gm5620; Tuba1a; Tuba1b; Tuba1c; Tuba4a	TUBA3C; TUBA1A; TUBA1B; TUBA1C; TUBA4A	310; §311; §311; §311; §311	PREDICTED: tubulin alpha-1B chain	XP_486246; P68369; P05213; P68373; P68368	http://www.phosphosite.org/proteinAction.do?id=25230&showAllSites=true	50; 50; 50; 50; 50	KCDPRHGK*YMACCLL; KCDPRHGK*YMACCLL; KCDPRHGK*YMACCLL; KCDPRHGK*YMACCLL; KCDPRHGK*YMACCLL	HGK*YMACCLLYR	3	538.584	6930	6878	6832	6912	7029	6941	7334	7452	6940	6888	6872	6910	7027	7003	7365	7439	4.165	3.824	3.004	4.043	4.072	2.408	3.858	4.213	0.2297	0.1733	0.3679	0.4348	0.314	0.182	0.2403	-0.1099	0.401	0.336	0.396	0.407
117	113	Adhesion or extracellular matrix protein	Gm5620; Tuba1a; Tuba1b; Tuba1c; Tuba4a	TUBA3C; TUBA1A; TUBA1B; TUBA1C; TUBA4A	310; §311; §311; §311; §311	PREDICTED: tubulin alpha-1B chain	XP_486246; P68369; P05213; P68373; P68368	http://www.phosphosite.org/proteinAction.do?id=25230&showAllSites=true	50; 50; 50; 50; 50	KCDPRHGK*YMACCLL; KCDPRHGK*YMACCLL; KCDPRHGK*YMACCLL; KCDPRHGK*YMACCLL; KCDPRHGK*YMACCLL	HGK*YM#ACCLLYR	2	815.37	5709	5630	5622	5671	5840	5800	6052	6155	5712	5700	5629	5667	5776	5727	6089	6185	3.683	3.79	3.627	3.575	3.611	3.656	3.858	3.562	0.4081	0.6143	0.672	0.6296	0.5204	0.4615	0.3989	0.3424	0.505	0.534	0.491	0.559
118	114	Adhesion or extracellular matrix protein	Gm5620; Tuba1a; Tuba1b; Tuba1c; Tuba4a	TUBA3C; TUBA1A; TUBA1B; TUBA1C; TUBA4A	310; §311; §311; §311; §311	PREDICTED: tubulin alpha-1B chain	XP_486246; P68369; P05213; P68373; P68368	http://www.phosphosite.org/proteinAction.do?id=25230&showAllSites=true	50; 50; 50; 50; 50	KCDPRHGK*YMACCLL; KCDPRHGK*YMACCLL; KCDPRHGK*YMACCLL; KCDPRHGK*YMACCLL; KCDPRHGK*YMACCLL	HGK*YM#ACCLLYR	2	815.37	5794	5725		5763	5742	5704	6152	6255	5712	5700		5667	5776	5727	6089	6185	2.927	3.405		3.345	3.215	3.541	2.401	2.913	0.4234	0.6026		0.6026	0.5032	0.429	0.5026	0.3437	0.4	0.547		0.508
119	115	Adhesion or extracellular matrix protein	Gm5620; Tuba1a; Tuba1b; Tuba1c; Tuba4a	TUBA3C; TUBA1A; TUBA1B; TUBA1C; TUBA4A	310; §311; §311; §311; §311	PREDICTED: tubulin alpha-1B chain	XP_486246; P68369; P05213; P68373; P68368	http://www.phosphosite.org/proteinAction.do?id=25230&showAllSites=true	50; 50; 50; 50; 50	KCDPRHGK*YMACCLL; KCDPRHGK*YMACCLL; KCDPRHGK*YMACCLL; KCDPRHGK*YMACCLL; KCDPRHGK*YMACCLL	HGK*YM#ACCLLYR	3	543.916	5735	5704	5652	5701	5777	5739	6123	6232	5745	5700	5629	5711	5776	5793	6122	6163	4.128	4.447	3.934	4.355	4.013	4.555	4.039	3.663	0.3234	0.2909	0.3142	0.4836	0.297	0.4615	0.4155	0.1596	0.341	0.457	0.384	0.388
120	116	Adhesion or extracellular matrix protein	Gm5620; Tuba1a; Tuba1b; Tuba1c; Tuba4a	TUBA3C; TUBA1A; TUBA1B; TUBA1C; TUBA4A	310; §311; §311; §311; §311	PREDICTED: tubulin alpha-1B chain	XP_486246; P68369; P05213; P68373; P68368	http://www.phosphosite.org/proteinAction.do?id=25230&showAllSites=true	50; 50; 50; 50; 50	KCDPRHGK*YMACCLL; KCDPRHGK*YMACCLL; KCDPRHGK*YMACCLL; KCDPRHGK*YMACCLL; KCDPRHGK*YMACCLL	HGK*YM#ACCLLYR	3	543.916	5835	5793	5610	5669	5757	5840	6027	6134	5745	5700	5629	5711	5776	5793	6122	6163	3.853	3.495	3.892	3.43	3.587	3.329	3.301	3.643	0.2725	0.1025	0.3155	0.4922	0.2719	0.378	0.4639	0.205	0.38	0.337	0.372	0.322
121	117	Adhesion or extracellular matrix protein	Gm5620; Tuba1a; Tuba1b; Tuba1c; Tuba4a	TUBA3C; TUBA1A; TUBA1B; TUBA1C; TUBA4A	310; §311; §311; §311; §311	PREDICTED: tubulin alpha-1B chain	XP_486246; P68369; P05213; P68373; P68368	http://www.phosphosite.org/proteinAction.do?id=25230&showAllSites=true	50; 50; 50; 50; 50	KCDPRHGK*YMACCLL; KCDPRHGK*YMACCLL; KCDPRHGK*YMACCLL; KCDPRHGK*YMACCLL; KCDPRHGK*YMACCLL	HGK*YM#ACCLLYR	3	543.916			5740	5789	5877	5667	6238	6335			5629	5711	5776	5793	6122	6163			3.599	3.264	3.309	2.863	3.129	3.395			0.2621	0.3842	0.2498	0.5566	0.3032	0.0436			0.264	0.294
122	118	Adhesion or extracellular matrix protein	Gm5620; Tuba1a; Tuba1b; Tuba1c; Tuba4a	TUBA3C; TUBA1A; TUBA1B; TUBA1C; TUBA4A	310; §311; §311; §311; §311	PREDICTED: tubulin alpha-1B chain	XP_486246; P68369; P05213; P68373; P68368	http://www.phosphosite.org/proteinAction.do?id=25230&showAllSites=true	50; 50; 50; 50; 50	KCDPRHGK*YMACCLL; KCDPRHGK*YMACCLL; KCDPRHGK*YMACCLL; KCDPRHGK*YMACCLL; KCDPRHGK*YMACCLL	HGK*YM#ACCLLYR	3	543.916				6213			6009	6821				5711			6122	6163				2.758			2.982	2.177				0.5676			0.5321	0.5038				0.209
123	119	Adhesion or extracellular matrix protein	Gm5620; Tuba1a; Tuba1b; Tuba1c; Tuba4a	TUBA3C; TUBA1A; TUBA1B; TUBA1C; TUBA4A	310; §311; §311; §311; §311	PREDICTED: tubulin alpha-1B chain	XP_486246; P68369; P05213; P68373; P68368	http://www.phosphosite.org/proteinAction.do?id=25230&showAllSites=true	50; 50; 50; 50; 50	KCDPRHGK*YMACCLL; KCDPRHGK*YMACCLL; KCDPRHGK*YMACCLL; KCDPRHGK*YMACCLL; KCDPRHGK*YMACCLL	HGK*YM#ACCLLYR	3	543.916							6725	6622								6163							1.795	1.669							0.926	0.3756
124	120	Adhesion or extracellular matrix protein	Gm5620; Tuba1a; Tuba1b; Tuba1c; Tuba3a; Tuba3b; Tuba4a; Tuba8; Tubal3	TUBA3C; TUBA1A; TUBA1B; TUBA1C; TUBA3D; TUBA3E; TUBA4A; TUBA8; TUBAL3	§393; §394; §394; §394; §394; 394; §394; §394; §401	PREDICTED: tubulin alpha-1B chain	XP_486246; P68369; P05213; P68373; P05214; NP_033475; P68368; Q9JJZ2; Q3UX10	http://www.phosphosite.org/proteinAction.do?id=25230&showAllSites=true	50; 50; 50; 50; 50; 50; 50; 50; 50	AWARLDHK*FDLMYAK; AWARLDHK*FDLMYAK; AWARLDHK*FDLMYAK; AWARLDHK*FDLMYAK; AWARLDHK*FDLMYAK; AWARLDHK*FDLMYAK; AWARLDHK*FDLMYAK; AWARLDHK*FDLMYAK; AWARLDHK*FDLMYAK	LDHK*FDLMYAK	3	474.908							8250	8292							8267	8319							3.902	3.503							0.382	0.0664
125	121	Adhesion or extracellular matrix protein	Gm5620; Tuba1a; Tuba1b; Tuba1c; Tuba3a; Tuba3b; Tuba4a; Tuba8; Tubal3	TUBA3C; TUBA1A; TUBA1B; TUBA1C; TUBA3D; TUBA3E; TUBA4A; TUBA8; TUBAL3	§393; §394; §394; §394; §394; 394; §394; §394; §401	PREDICTED: tubulin alpha-1B chain	XP_486246; P68369; P05213; P68373; P05214; NP_033475; P68368; Q9JJZ2; Q3UX10	http://www.phosphosite.org/proteinAction.do?id=25230&showAllSites=true	50; 50; 50; 50; 50; 50; 50; 50; 50	AWARLDHK*FDLMYAK; AWARLDHK*FDLMYAK; AWARLDHK*FDLMYAK; AWARLDHK*FDLMYAK; AWARLDHK*FDLMYAK; AWARLDHK*FDLMYAK; AWARLDHK*FDLMYAK; AWARLDHK*FDLMYAK; AWARLDHK*FDLMYAK	LDHK*FDLM#YAK	2	719.855			6284								6289								2.844								0.2042								0.018
126	122	Adhesion or extracellular matrix protein	Gm5620; Tuba1a; Tuba1b; Tuba1c; Tuba3a; Tuba3b; Tuba4a; Tuba8; Tubal3	TUBA3C; TUBA1A; TUBA1B; TUBA1C; TUBA3D; TUBA3E; TUBA4A; TUBA8; TUBAL3	§393; §394; §394; §394; §394; 394; §394; §394; §401	PREDICTED: tubulin alpha-1B chain	XP_486246; P68369; P05213; P68373; P05214; NP_033475; P68368; Q9JJZ2; Q3UX10	http://www.phosphosite.org/proteinAction.do?id=25230&showAllSites=true	50; 50; 50; 50; 50; 50; 50; 50; 50	AWARLDHK*FDLMYAK; AWARLDHK*FDLMYAK; AWARLDHK*FDLMYAK; AWARLDHK*FDLMYAK; AWARLDHK*FDLMYAK; AWARLDHK*FDLMYAK; AWARLDHK*FDLMYAK; AWARLDHK*FDLMYAK; AWARLDHK*FDLMYAK	LDHK*FDLM#YAK	3	480.239	6328		6335		6478	6448	6801	6869	6358		6289		6433	6398	6727	6823	2.651		3.137		2.969	2.638	2.476	3.717	-0.069		-0.0683		-0.078	-0.0627	0.0138	-0.486	0.084		0.289
127	123	Adhesion or extracellular matrix protein	Gm5620; Tuba1a; Tuba1b; Tuba1c; Tuba3a; Tuba3b; Tuba4a; Tuba8	TUBA3C; TUBA1A; TUBA1B; TUBA1C; TUBA3D; TUBA3E; TUBA4A; TUBA8	§393; §394; §394; §394; §394; 394; §394; §394	PREDICTED: tubulin alpha-1B chain	XP_486246; P68369; P05213; P68373; P05214; NP_033475; P68368; Q9JJZ2	http://www.phosphosite.org/proteinAction.do?id=25230&showAllSites=true	50; 50; 50; 50; 50; 50; 50; 50	AWARLDHK*FDLMYAK; AWARLDHK*FDLMYAK; AWARLDHK*FDLMYAK; AWARLDHK*FDLMYAK; AWARLDHK*FDLMYAK; AWARLDHK*FDLMYAK; AWARLDHK*FDLMYAK; AWARLDHK*FDLMYAK	LDHK*FDLM#YAKR	3	532.273	5180						5477	5580								5592	1.965						2.004	2.393	0.1215						-0.2854	0.1071	0.009
128	124	Adhesion or extracellular matrix protein	Gm5620; Tuba1a; Tuba1b; Tuba1c; Tuba3a; Tuba3b; Tuba4a; Tuba8	TUBA3C; TUBA1A; TUBA1B; TUBA1C; TUBA3D; TUBA3E; TUBA4A; TUBA8	§400; §401; §401; §401; §401; 401; §401; §401	PREDICTED: tubulin alpha-1B chain	XP_486246; P68369; P05213; P68373; P05214; NP_033475; P68368; Q9JJZ2	http://www.phosphosite.org/proteinAction.do?id=25230&showAllSites=true	50; 50; 50; 50; 50; 50; 50; 50	KFDLMYAK*RAFVYWY; KFDLMYAK*RAFVHWY; KFDLMYAK*RAFVHWY; KFDLMYAK*RAFVHWY; KFDLMYAK*RAFVHWY; KFDLMYAK*RAFVHWY; KFDLMYAK*RAFVHWY; KFDLMYAK*RAFVHWY	LDHKFDLM#YAK*R	3	532.273				5189								5128								2.357								0.3159								0.105
129	125	Adhesion or extracellular matrix protein	Gm5620; Tuba1a; Tuba1b; Tuba1c; Tuba3a; Tuba3b; Tuba4a; Tuba8	TUBA3C; TUBA1A; TUBA1B; TUBA1C; TUBA3D; TUBA3E; TUBA4A; TUBA8	95; 96; 96; 96; 96; 96; 96; 96	PREDICTED: tubulin alpha-1B chain	XP_486246; P68369; P05213; P68373; P05214; NP_033475; P68368; Q9JJZ2	http://www.phosphosite.org/proteinAction.do?id=25230&showAllSites=true	50; 50; 50; 50; 50; 50; 50; 50	PEQLITGK*EDAANNY; PEQLITGK*EDAANNY; PEQLITGK*EDAANNY; PEQLITGK*EDAANNY; PEQLITGK*EDAANNY; PEQLITGK*EDAANNY; PEQLITGK*EDAANNY; PEQLITGK*EDAANNY	QLFHPEQLITGK*EDAANNYAR	3	819.743	9693	9664	9670	9675	9858	9785	10350	10292	9723	9695	9710	9725	9894	9841	10291	10255	4.061	4.78	4.744	5.044	4.758	3.233	5.517	4.991	0.902	0.9268	1.2699	0.8649	0.7994	0.801	0.7192	0.375	0.299	0.44	0.466	0.447
130	126	Adhesion or extracellular matrix protein	Gm5620; Tuba1a; Tuba1b; Tuba1c; Tuba3a; Tuba3b; Tuba4a; Tuba8	TUBA3C; TUBA1A; TUBA1B; TUBA1C; TUBA3D; TUBA3E; TUBA4A; TUBA8	95; 96; 96; 96; 96; 96; 96; 96	PREDICTED: tubulin alpha-1B chain	XP_486246; P68369; P05213; P68373; P05214; NP_033475; P68368; Q9JJZ2	http://www.phosphosite.org/proteinAction.do?id=25230&showAllSites=true	50; 50; 50; 50; 50; 50; 50; 50	PEQLITGK*EDAANNY; PEQLITGK*EDAANNY; PEQLITGK*EDAANNY; PEQLITGK*EDAANNY; PEQLITGK*EDAANNY; PEQLITGK*EDAANNY; PEQLITGK*EDAANNY; PEQLITGK*EDAANNY	QLFHPEQLITGK*EDAANNYAR	3	819.743			9673	9680			10257	10293			9710	9725			10291	10255			3.329	3.573			4.215	3.991			1.2699	0.8649			0.7253	0.375			0.359	0.374
131	127	Adhesion or extracellular matrix protein	Gm5620; Tuba1a; Tuba1b; Tuba1c; Tuba3a; Tuba3b; Tuba4a; Tuba8	TUBA3C; TUBA1A; TUBA1B; TUBA1C; TUBA3D; TUBA3E; TUBA4A; TUBA8	95; 96; 96; 96; 96; 96; 96; 96	PREDICTED: tubulin alpha-1B chain	XP_486246; P68369; P05213; P68373; P05214; NP_033475; P68368; Q9JJZ2	http://www.phosphosite.org/proteinAction.do?id=25230&showAllSites=true	50; 50; 50; 50; 50; 50; 50; 50	PEQLITGK*EDAANNY; PEQLITGK*EDAANNY; PEQLITGK*EDAANNY; PEQLITGK*EDAANNY; PEQLITGK*EDAANNY; PEQLITGK*EDAANNY; PEQLITGK*EDAANNY; PEQLITGK*EDAANNY	QLFHPEQLITGK*EDAANNYAR	3	819.743							10351	10198							10291	10255							2.87	3.208							0.7192	0.3334
132	128	Adhesion or extracellular matrix protein	Lmnb2	Lamin B2	§59	lamin-B2	P21619	http://www.phosphosite.org/proteinAction.do?id=7445&showAllSites=true	67	LLLRISEK*EEVTTRE	ISEK*EEVTTR	2	617.32		3042	3024	3045	3135	3068				3057	3036	3053	3152	3075				3.438	3.63	3.209	3.385	3.229				0.2526	0.4382	0.4042	0.0264	0.4933				0.399	0.384	0.282
133	129	Adhesion or extracellular matrix protein	Mapre1	EB1	83	microtubule-associated protein RP/EB family member 1	Q61166	http://www.phosphosite.org/proteinAction.do?id=2758&showAllSites=true	30	KILQAGFK*RMGVDKI	ILQAGFK*R	2	487.793				4802								4809								2.047								0.5995								0.098
134	130	Adhesion or extracellular matrix protein	Mmp9	MMP9	77	matrix metalloproteinase-9 precursor	P41245	http://www.phosphosite.org/proteinAction.do?id=5635&showAllSites=true	81	PALLMLQK*QLSLPQT	AAQM#M#GEKQSLRPALLM#LQK*QLS	4	666.349		14358																3.107								-0.0358								0.032
135	131	Adhesion or extracellular matrix protein	Mtap1b	MAP1B	1228	microtubule-associated protein 1B	P14873	http://www.phosphosite.org/proteinAction.do?id=3340&showAllSites=true	270	DAYCSEEK*ELKASAE	DAYCSEEK*ELK	2	707.314	4385	4299	4267	4296	4430	4349	4708		4388	4305	4279	4303	4421	4354	4692		2.849	2.719	2.571	3.145	2.614	2.733	2.474		0.5255	0.3147	0.3777	0.7823	0.8849	0.2369	0.4873		0.333	0.302	0.385	0.313
136	132	Adhesion or extracellular matrix protein	Mtap1b	MAP1B	1765	microtubule-associated protein 1B	P14873	http://www.phosphosite.org/proteinAction.do?id=3340&showAllSites=true	270	YASLASEK*VQSLEGE	EM#SLYASLASEK*VQSLEGEKLSPK	3	894.79	11463	11475	11511	11537	11725	11657	12178	12094			11549			11674		12118	2.052	2.459	2.894	2.115	1.789	2.457	1.981	2.271	0.9501	1.2733	1.3277	1.4325	1.1216	0.9035	1.192	0.3431	0.076	0.106	0.235	0.178
137	133	Adhesion or extracellular matrix protein	Mtap1b	MAP1B	296	microtubule-associated protein 1B	P14873	http://www.phosphosite.org/proteinAction.do?id=3340&showAllSites=true	270	ERKSCFWK*LIRHLDR	SCFWK*LIR	2	576.305	10752					10916		11415	10746					10908		11410	2.573					2.419		2.476	-0.233					0.1439		-0.2999	0.076
138	134	Adhesion or extracellular matrix protein	Myh8	MYH8	1620	myosin-8	P13542	http://www.phosphosite.org/proteinAction.do?id=11903&showAllSites=true	223	DALRVKKK*MEGDLNE	K*M#EGDLNEM#EIQLNHANRLAAESLRNYR	4	848.164						15258																2.137								-0.9269
139	135	Adhesion or extracellular matrix protein	Ncam1; Ncam1	NCAM1; NCAM1 iso2	1092; 825	neural cell adhesion molecule 1 isoform 1	P13595; P13595-2	http://www.phosphosite.org/proteinAction.do?id=6509&showAllSites=true	119; 94	EPPESEAK*PAPTEVK; EPPESEAK*PAPTEVK	SEPPESEAK*PAPTEVK	2	869.431	3633	3665	3639	3658	3847	3661	4023	3990	3715	3629	3679	3654	3730	3681	3966	4059	3.056	2.666	2.663	3.041	2.522	2.68	2.47	2.768	0.6339	0.4307	0.6517	0.7754	0.5067	0.5096	0.3939	0.4802	0.454	0.485	0.463	0.452
140	136	Adhesion or extracellular matrix protein	Ncam1; Ncam1	NCAM1; NCAM1 iso2	1092; 825	neural cell adhesion molecule 1 isoform 1	P13595; P13595-2	http://www.phosphosite.org/proteinAction.do?id=6509&showAllSites=true	119; 94	EPPESEAK*PAPTEVK; EPPESEAK*PAPTEVK	SEPPESEAK*PAPTEVK	2	869.431	3874	3761	3728	3748	3755	3764	4130	4141	3715	3629	3679	3654	3730	3681	3966	4059	2.628	2.565	1.521	2.245	2.474	2.09	2.363	2.534	0.2869	0.4676	0.6759	0.8669	0.6603	0.5585	0.3203	0.4279	0.301	0.383	0.195	0.418
141	137	Adhesion or extracellular matrix protein	Ncam1; Ncam1	NCAM1; NCAM1 iso2	1092; 825	neural cell adhesion molecule 1 isoform 1	P13595; P13595-2	http://www.phosphosite.org/proteinAction.do?id=6509&showAllSites=true	119; 94	EPPESEAK*PAPTEVK; EPPESEAK*PAPTEVK	SEPPESEAK*PAPTEVK	2	869.431	3779	3853				3923		4244	3715	3629				3681		4059	1.73	2.203				1.816		2.449	0.49	0.7875				0.627		0.3519	0.329	0.312
142	138	Adhesion or extracellular matrix protein	Ncam1; Ncam1	NCAM1; NCAM1 iso2	638; 638	neural cell adhesion molecule 1 isoform 1	P13595; P13595-2	http://www.phosphosite.org/proteinAction.do?id=6509&showAllSites=true	119; 94	PIRHYLVK*YRALASE; PIRHYLVK*YRALASE	HYLVK*YR	2	510.785							3746																1.759								0.1747
143	139	Adhesion or extracellular matrix protein	Nf1	NF1	§1583	neurofibromin	Q04690	http://www.phosphosite.org/proteinAction.do?id=7651&showAllSites=true	320	TRHQVHEK*EEFKALK	HQVHEK*EEFK	3	451.558	1681		1635						1686		1616						2.581		2.78						0.7539		0.819						0.023		0.074
144	140	Adhesion or extracellular matrix protein	Nf1	NF1	48	neurofibromin	Q04690	http://www.phosphosite.org/proteinAction.do?id=7651&showAllSites=true	320	ECLINISK*YKFSLVI	INISK*YK	2	454.266			6620					7132											1.991					2.077			0.4317					-0.1677			0.012
145	141	Adhesion or extracellular matrix protein	Numa1	NuMA-1	§377	nuclear mitotic apparatus protein 1	Q80Y35	http://www.phosphosite.org/proteinAction.do?id=3454&showAllSites=true	236	DKKCLEEK*NEILQGK	CLEEK*NEILQGK	2	751.88	6834	6775	6769	6816	6923	6888	7273	7325	6852	6778	6762	6822	6917	6882	7266	7329	4.082	3.674	3.685	3.445	3.741	3.304	3.408	3.172	0.5809	0.6901	0.9416	0.7041	0.4865	0.2822	0.1604	0.2103	0.295	0.269	0.31	0.285
146	142	Adhesion or extracellular matrix protein	Pfn2	profilin 2	133	profilin-2	Q9JJV2	http://www.phosphosite.org/proteinAction.do?id=8331&showAllSites=true	15	KKAYSMAK*YLRDSGF	AYSM#AK*YLR	2	580.792			4382	4411							3712	3742							1.705	1.883							0.0068	0.2299							0.183	0.099
147	143	Adhesion or extracellular matrix protein	Pi4ka	PIK4CA	549	phosphatidylinositol 4-kinase type 3 alpha	Q6DIC7	http://www.phosphosite.org/proteinAction.do?id=8357&showAllSites=true	231	YISQESDK*DAHLIPD	LYISQESDK*DAHLIPDHTIR	3	798.408	7236	7215	7217	7259	7354	7319	7648	7691	7259	7229	7224	7262	7324	7333	7651	7725	3.578	3.532	3.606	4.077	4.381	3.732	4.851	3.547	-0.3872	-0.4921	0.1844	-0.0032	-0.218	-0.6091	-0.1637	-0.1695	0.099	0.333	0.356	0.33
148	144	Adhesion or extracellular matrix protein	Pi4ka	PIK4CA	549	phosphatidylinositol 4-kinase type 3 alpha	Q6DIC7	http://www.phosphosite.org/proteinAction.do?id=8357&showAllSites=true	231	YISQESDK*DAHLIPD	LYISQESDK*DAHLIPDHTIR	4	599.058			7185	7222	7336		7675	7667			7213	7251	7357		7640	7692			2.636	2.398	2.353		2.895	2.36			0.4681	0.4819	0.469		0.1627	-0.2142			0.167	0.166
149	145	Adhesion or extracellular matrix protein	Pip5k1a; Pip5k1b	PIP5K1A; PIP5K1B	179; 138	phosphatidylinositol-4-phosphate 5-kinase type-1 alpha	P70182; P70181	http://www.phosphosite.org/proteinAction.do?id=11799&showAllSites=true	60; 61	SDDEFIIK*TVQHKEA; SDDEFIIK*TVQHKEA	EFIIK*TVQHKEAEFLQK	3	710.725								15205																2.106								1.9942
150	146	Adhesion or extracellular matrix protein	Ran	RAN	§37	GTP-binding nuclear protein Ran	P62827	http://www.phosphosite.org/proteinAction.do?id=4804&showAllSites=true	24	HLTGEFEK*KYVATLG	HLTGEFEK*K	2	565.796							3172	3259							3173	3261							1.818	2.143							0.1742	0.4254
151	147	Adhesion or extracellular matrix protein	Rap1gap; Rap1gap	Rap1GAP; Rap1GAP iso4	§442; §442	rap1 GTPase-activating protein 1	Q6A063; A2ALS4	http://www.phosphosite.org/proteinAction.do?id=11296&showAllSites=true	81; 81	NAEYACYK*AEKFAKL; NAEYACYK*AEKFAKL	LINAEYACYK*AEK	2	807.895	6417	6375	6352	6399	6517	6471	6797	6882	6424	6382	6366	6393	6510	6475	6804	6889	4.023	3.921	4.622	3.956	3.947	3.977	4.157	4.414	0.3145	0.5276	0.9214	1.1877	0.875	0.8533	0.3746	0.1554	0.396	0.43	0.429	0.387
152	148	Adhesion or extracellular matrix protein	Rtn4; Rtn4	Nogo; Nogo iso4	§371; §371	reticulon-4 isoform C	Q99P72; AAM77068	http://www.phosphosite.org/proteinAction.do?id=6765&showAllSites=true	127; 127	REEYADFK*PFEQAWE; REEYADFK*PFEQAWE	M#SVVAPVREEYADFK*PFEQAWEVK	3	971.809	11895	11914	11953	11999	12156	12078	12636		11933	11966	11978	12039	12182	12103	12648		4.408	4.786	4.885	4.915	3.668	5.343	4.659		1.2314	1.1147	1.3292	1.8626	1.3477	0.665	1.045		0.323	0.375	0.411	0.397
153	149	Adhesion or extracellular matrix protein	Rtn4; Rtn4	Nogo; Nogo iso4	§371; §371	reticulon-4 isoform C	Q99P72; AAM77068	http://www.phosphosite.org/proteinAction.do?id=6765&showAllSites=true	127; 127	REEYADFK*PFEQAWE; REEYADFK*PFEQAWE	M#SVVAPVREEYADFK*PFEQAWEVK	3	971.809						12091								12103								4.267								0.665
154	150	Adhesion or extracellular matrix protein	Rtn4; Rtn4	Nogo; Nogo iso4	§371; §371	reticulon-4 isoform C	Q99P72; AAM77068	http://www.phosphosite.org/proteinAction.do?id=6765&showAllSites=true	127; 127	REEYADFK*PFEQAWE; REEYADFK*PFEQAWE	M#SVVAPVREEYADFK*PFEQAWEVKDTYEGSR	4	931.192	11310	11325	11338	11381	11552	11537	11995	11893	11372	11350	11373	11401	11566	11476	12010	11898	4.596	3.931	4.223	4.436	4.178	4.07	5.044	4.346	1.0377	0.9628	1.2089	0.8725	0.9246	1.1304	1.2403	0.8891	0.353	0.165	0.409	0.371
155	151	Adhesion or extracellular matrix protein	Rtn4; Rtn4	Nogo; Nogo iso4	§371; §371	reticulon-4 isoform C	Q99P72; AAM77068	http://www.phosphosite.org/proteinAction.do?id=6765&showAllSites=true	127; 127	REEYADFK*PFEQAWE; REEYADFK*PFEQAWE	M#SVVAPVREEYADFK*PFEQAWEVKDTYEGSR	4	931.192						11453								11476								3.468								1.3435
156	152	Adhesion or extracellular matrix protein	Sbno2	SBNO2	452	protein strawberry notch homolog 2	Q7TNB8	http://www.phosphosite.org/proteinAction.do?id=22530&showAllSites=true	149	EFLHAIEK*RGVGAME	HAIEK*R	2	398.227				1202		1190														1.743		1.757						-0.4357		0.2746						0.03
157	153	Adhesion or extracellular matrix protein	Sbno2	SBNO2	452	protein strawberry notch homolog 2	Q7TNB8	http://www.phosphosite.org/proteinAction.do?id=22530&showAllSites=true	149	EFLHAIEK*RGVGAME	HAIEK*R	2	398.227						1225																1.538								0.2205
158	154	Adhesion or extracellular matrix protein	Serpina1c	Serpina1c	292	alpha-1-antitrypsin 1-3	NP_033271	http://www.ncbi.nlm.nih.gov/entrez/query.fcgi?db=protein&cmd=search&term=NP_033271	46	LSKELISK*FLLKRPR	ELISK*FLLK	2	566.852			11492								11472								1.72								0.677								0.17
159	155	Adhesion or extracellular matrix protein	Spnb2; Spnb2	SPTBN1; SPTBN1 iso2	§1815; §1802	spectrin beta chain, brain 1 isoform 2	Q62261; Q62261-2	http://www.phosphosite.org/proteinAction.do?id=5047&showAllSites=true	274; 251	HKFYHDAK*EIFGRIQ; HKFYHDAK*EIFGRIQ	FYHDAK*EIFGR	3	475.57			7274	7319		7396					7279	7317							3.129	2.657		1.959					1.0818	0.8656		0.2887					0.142	0.118
160	156	Adhesion or extracellular matrix protein	Spnb2; Spnb2	SPTBN1; SPTBN1 iso2	§1913; §1900	spectrin beta chain, brain 1 isoform 2	Q62261; Q62261-2	http://www.phosphosite.org/proteinAction.do?id=5047&showAllSites=true	274; 251	RLVDTGDK*FRFFSMV; RLVDTGDK*FRFFSMV	LVDTGDK*FR	2	546.788	4990	4907		4944	5046	4992	5353	5423	5010			4941	5043	4980	5330	5460	2.666	1.443		2.925	2.502	2.46	2.672	2.359	-0.1903	-0.2663		0.0733	-0.053	0.0595	-0.399	-0.5345	0.288	0.038		0.315
161	157	Adhesion or extracellular matrix protein	Spnb3	SPTBN2	1478	spectrin beta chain, brain 2	Q3UGZ4	http://www.phosphosite.org/proteinAction.do?id=11929&showAllSites=true	271	RALCQPMK*ERCRRLH	ALCQPMK*ER	2	587.789	3296	3228	3211	3253	3348	3277	3622		3305	3242	3234	3251		3273	3605		2.559	2.853	2.48	2.406	1.798	2.412	2.442		0.6284	0.2172	0.3134	0.2972	0.2095	0.562	0.1789		0.198	0.141	0.157	0.202
162	158	Adhesion or extracellular matrix protein	Spnb4	SPTBN4	1511	spectrin beta 4 isoform sigma6	Q8VIE5	http://www.phosphosite.org/proteinAction.do?id=10382&showAllSites=true	289	RRLLLASK*ELHQVAH	RRLLLASK*ELHQ	3	502.635						775																1.961								1.1976
163	159	Adhesion or extracellular matrix protein	Tcp1; Tcp1	CCT-alpha; CCT-alpha iso2	§400; §351	T-complex protein 1 subunit alpha	P11983; P11983-2	http://www.phosphosite.org/proteinAction.do?id=8014&showAllSites=true	60; 55	HDALCVVK*RVLELKS; HDALCVVK*RVLELKS	SLHDALCVVK*R	2	670.361	6092							6572	6141							6636	2.91							3.352	-0.0462							-0.2455	0.347
164	160	Adhesion or extracellular matrix protein	Tcp1; Tcp1	CCT-alpha; CCT-alpha iso2	§400; §351	T-complex protein 1 subunit alpha	P11983; P11983-2	http://www.phosphosite.org/proteinAction.do?id=8014&showAllSites=true	60; 55	HDALCVVK*RVLELKS; HDALCVVK*RVLELKS	SLHDALCVVK*R	3	447.243	6089	6131	6081	6097	6195	6135	6473	6560	6141	6074	6058	6118	6205	6167	6507	6592	2.415	2.713	3.152	2.974	3.184	2.141	2.968	2.892	0.2135	0.3479	0.7793	0.6509	0.4994	0.4979	0.433	0.1493	0.027	0.06	0.191	0.201
165	161	Adhesion or extracellular matrix protein	Tcp1; Tcp1	CCT-alpha; CCT-alpha iso2	§400; §351	T-complex protein 1 subunit alpha	P11983; P11983-2	http://www.phosphosite.org/proteinAction.do?id=8014&showAllSites=true	60; 55	HDALCVVK*RVLELKS; HDALCVVK*RVLELKS	SLHDALCVVK*R	3	447.243		6042								6074								2.41								0.3643								0.124
166	162	Adhesion or extracellular matrix protein	Tmsb10	TMSB10	§4	thymosin beta-10	Q6ZWY8	http://www.phosphosite.org/proteinAction.do?id=7707705&showAllSites=true	5	----MADK*PDMGEIA	ADK*PDMGEIASFDK	2	783.361	7966				8058	8032							8061				2.733				3.315	3.113			1.025				0.735	0.4355			0.15
167	163	Adhesion or extracellular matrix protein	Tmsb10	TMSB10	§4	thymosin beta-10	Q6ZWY8	http://www.phosphosite.org/proteinAction.do?id=7707705&showAllSites=true	5	----MADK*PDMGEIA	ADK*PDM#GEIASFDK	2	791.359	5667	5594	5581	5644	5695	5655			5679	5590		5623	5688	5672			2.739	2.88	2.263	2.49	3.405	2.989			0.492	0.3302	-0.1667	0.7481	0.413	0.3207			0.351	0.44	0.228	0.27
168	164	Adhesion or extracellular matrix protein	Tmsb10	TMSB10	§4	thymosin beta-10	Q6ZWY8	http://www.phosphosite.org/proteinAction.do?id=7707705&showAllSites=true	5	----MADK*PDMGEIA	ADK*PDMGEIASFDKAK	3	588.954					6975	6921		7367													3.418	3.236		3.36					0.4618	0.4233		-0.2691
169	165	Adhesion or extracellular matrix protein	Tmsb10	TMSB10	§4, §15	thymosin beta-10	Q6ZWY8	http://www.phosphosite.org/proteinAction.do?id=7707705&showAllSites=true	5	----MADK*PDMGEIA, GEIASFDK*AKLKKTE	ADK*PDM#GEIASFDK*AK	2	911.93	6466	6423															2.249	2.154							0.4585	0.2972							0.346	0.238
170	166	Adhesion or extracellular matrix protein	Tmsb4x	TMSB4X	§10	thymosin beta-4	P20065	http://www.phosphosite.org/proteinAction.do?id=7745&showAllSites=true	6	LPATMSDK*PDMAEIE	SDK*PDMAEIEK	2	652.806						4371																2.146								0.1305
171	167	Adhesion or extracellular matrix protein	Tmsb4x	TMSB4X	§10	thymosin beta-4	P20065	http://www.phosphosite.org/proteinAction.do?id=7745&showAllSites=true	6	LPATMSDK*PDMAEIE	SDK*PDMAEIEKFDK	3	565.603					7025																2.952								0.6244
172	168	Adhesion or extracellular matrix protein	Tmsb4x	TMSB4X	§10, §21	thymosin beta-4	P20065	http://www.phosphosite.org/proteinAction.do?id=7745&showAllSites=true	6	LPATMSDK*PDMAEIE, AEIEKFDK*SKLKKTE	SDK*PDMAEIEKFDK*SK	3	651.315	7308							7781									3.046							3.347	0.1707							0.4268	0.264
173	169	Adhesion or extracellular matrix protein	Tmsb4x	TMSB4X	§10, 23	thymosin beta-4	P20065	http://www.phosphosite.org/proteinAction.do?id=7745&showAllSites=true	6	LPATMSDK*PDMAEIE, IEKFDKSK*LKKTETQ	SDK*PDMAEIEKFDKSK*	3	651.315							7724																3.334								0.3254
174	170	Adhesion or extracellular matrix protein	Tuba1a; Tuba1b; Tuba1c	TUBA1A; TUBA1B; TUBA1C	§112; §112; §112	tubulin alpha-1A chain	P68369; P05213; P68373	http://www.phosphosite.org/proteinAction.do?id=2788&showAllSites=true	50; 50; 50	RGHYTIGK*EIIDLVL; RGHYTIGK*EIIDLVL; RGHYTIGK*EIIDLVL	GHYTIGK*EIIDLVLDR	3	628.679	14546			14595				15353				14624				15374	2.159			2.417				3.255	0.5127			0.8449				0.38	0.065			0.115
175	171	Adhesion or extracellular matrix protein	Tuba1a; Tuba1b; Tuba1c; Tuba3a; Tuba3b	TUBA1A; TUBA1B; TUBA1C; TUBA3D; TUBA3E	§326; §326; §326; §326; §326	tubulin alpha-1A chain	P68369; P05213; P68373; P05214; NP_033475	http://www.phosphosite.org/proteinAction.do?id=2788&showAllSites=true	50; 50; 50; 50; 50	YRGDVVPK*DVNAAIA; YRGDVVPK*DVNAAIA; YRGDVVPK*DVNAAIA; YRGDVVPK*DVNAAIA; YRGDVVPK*DVNAAIA	GDVVPK*DVNAAIATIK	2	826.965	9980	10061	10011	10006	10176	10121	10706	10653		10058		10066		10215	10687	10640	1.978	2.884	1.837	2.031	1.758	2.043	2.145	2.195	0.5775	0.7874	0.7172	0.7166	0.4444	0.7959	0.5884	0.321	0.058	0.296	0.01	0.208
176	172	Adhesion or extracellular matrix protein	Tuba1a; Tuba1b; Tuba1c; Tuba3a; Tuba3b	TUBA1A; TUBA1B; TUBA1C; TUBA3D; TUBA3E	§326; §326; §326; §326; §326	tubulin alpha-1A chain	P68369; P05213; P68373; P05214; NP_033475	http://www.phosphosite.org/proteinAction.do?id=2788&showAllSites=true	50; 50; 50; 50; 50	YRGDVVPK*DVNAAIA; YRGDVVPK*DVNAAIA; YRGDVVPK*DVNAAIA; YRGDVVPK*DVNAAIA; YRGDVVPK*DVNAAIA	GDVVPK*DVNAAIATIK	2	826.965				10057				10582												2.055				2.248				0.7154				0.3288				0.058
177	173	Adhesion or extracellular matrix protein	Tuba1a; Tuba1b; Tuba1c; Tuba3a; Tuba3b	TUBA1A; TUBA1B; TUBA1C; TUBA3D; TUBA3E	§326; §326; §326; §326; §326	tubulin alpha-1A chain	P68369; P05213; P68373; P05214; NP_033475	http://www.phosphosite.org/proteinAction.do?id=2788&showAllSites=true	50; 50; 50; 50; 50	YRGDVVPK*DVNAAIA; YRGDVVPK*DVNAAIA; YRGDVVPK*DVNAAIA; YRGDVVPK*DVNAAIA; YRGDVVPK*DVNAAIA	GDVVPK*DVNAAIATIK	3	551.645				10094	10227	10184						10066	10268	10215						2.072	2.074	2.294						0.595	0.5551	0.6597						0.252
178	174	Adhesion or extracellular matrix protein	Tuba1a; Tuba1b; Tuba1c; Tuba3a; Tuba3b	TUBA1A; TUBA1B; TUBA1C; TUBA3D; TUBA3E	§40; §40; §40; §40; §40	tubulin alpha-1A chain	P68369; P05213; P68373; P05214; NP_033475	http://www.phosphosite.org/proteinAction.do?id=2788&showAllSites=true	50; 50; 50; 50; 50	DGQMPSDK*TIGGGDD; DGQMPSDK*TIGGGDD; DGQMPSDK*TIGGGDD; DGQMPSDK*TIGGGDD; DGQMPSDK*TIGGGDD	CLEHGIQPDGQM#PSDK*TIGGGDDSFNTFFSETGAGK	4	965.427	10269	10239	10276	10273	10446	10401	10855	10820	10295	10267	10315	10308	10488		10896	10849	5.032	5.326	4.923	4.304	4.142	3.214	5.558	4.146	1.1932	1.6905	1.3648	1.4876	0.9618	1.1002	0.9817	1.1947	0.436	0.536	0.405	0.42
179	175	Adhesion or extracellular matrix protein	Tuba1a; Tuba1b; Tuba1c; Tuba3a; Tuba3b	TUBA1A; TUBA1B; TUBA1C; TUBA3D; TUBA3E	§40; §40; §40; §40; §40	tubulin alpha-1A chain	P68369; P05213; P68373; P05214; NP_033475	http://www.phosphosite.org/proteinAction.do?id=2788&showAllSites=true	50; 50; 50; 50; 50	DGQMPSDK*TIGGGDD; DGQMPSDK*TIGGGDD; DGQMPSDK*TIGGGDD; DGQMPSDK*TIGGGDD; DGQMPSDK*TIGGGDD	GIQPDGQM#PSDK*TIGGGDDSFNTFFSETGAGK	3	1107.16						11258		11707														2.402		2.525						2.9879		2.2465
180	176	Adhesion or extracellular matrix protein	Tuba1a; Tuba1b; Tuba1c; Tuba3a; Tuba3b	TUBA1A; TUBA1B; TUBA1C; TUBA3D; TUBA3E	§40; §40; §40; §40; §40	tubulin alpha-1A chain	P68369; P05213; P68373; P05214; NP_033475	http://www.phosphosite.org/proteinAction.do?id=2788&showAllSites=true	50; 50; 50; 50; 50	DGQMPSDK*TIGGGDD; DGQMPSDK*TIGGGDD; DGQMPSDK*TIGGGDD; DGQMPSDK*TIGGGDD; DGQMPSDK*TIGGGDD	GQM#PSDK*TIGGGDDSFNTFFSETGAGK	3	937.08		10658	10704	10729	10886	10833	11354	11323		10685	10733		10906	10864	11391	11322		3.778	4.577	2.891	4.732	4.128	4.093	4.464		1.0798	1.2208	1.3909	0.9089	1.0058	1.135	0.9349		0.376	0.436	0.316
181	177	Adhesion or extracellular matrix protein	Tuba1a; Tuba1b; Tuba1c; Tuba3a; Tuba3b	TUBA1A; TUBA1B; TUBA1C; TUBA3D; TUBA3E	§40; §40; §40; §40; §40	tubulin alpha-1A chain	P68369; P05213; P68373; P05214; NP_033475	http://www.phosphosite.org/proteinAction.do?id=2788&showAllSites=true	50; 50; 50; 50; 50	DGQMPSDK*TIGGGDD; DGQMPSDK*TIGGGDD; DGQMPSDK*TIGGGDD; DGQMPSDK*TIGGGDD; DGQMPSDK*TIGGGDD	HGIQPDGQM#PSDK*TIGGGDDSFNTFFSETGAGK	4	864.888			9961	9975		10087					9985			10094					4.306	3.566		4.535					2.787	2.0088		2.3719					0.346	0.232
182	178	Adhesion or extracellular matrix protein	Tuba1a; Tuba1b; Tuba1c; Tuba3a; Tuba3b	TUBA1A; TUBA1B; TUBA1C; TUBA3D; TUBA3E	§40; §40; §40; §40; §40	tubulin alpha-1A chain	P68369; P05213; P68373; P05214; NP_033475	http://www.phosphosite.org/proteinAction.do?id=2788&showAllSites=true	50; 50; 50; 50; 50	DGQMPSDK*TIGGGDD; DGQMPSDK*TIGGGDD; DGQMPSDK*TIGGGDD; DGQMPSDK*TIGGGDD; DGQMPSDK*TIGGGDD	K*TIGGGDDSFNTFFSETGAGK	2	1089.5	10620			10666													1.827			2.007					1.018			1.6195					0.497			0.434
183	179	Adhesion or extracellular matrix protein	Tuba1a; Tuba1b; Tuba1c; Tuba3a; Tuba3b	TUBA1A; TUBA1B; TUBA1C; TUBA3D; TUBA3E	§40; §40; §40; §40; §40	tubulin alpha-1A chain	P68369; P05213; P68373; P05214; NP_033475	http://www.phosphosite.org/proteinAction.do?id=2788&showAllSites=true	50; 50; 50; 50; 50	DGQMPSDK*TIGGGDD; DGQMPSDK*TIGGGDD; DGQMPSDK*TIGGGDD; DGQMPSDK*TIGGGDD; DGQMPSDK*TIGGGDD	K*TIGGGDDSFNTFFSETGAGK	3	726.671	10632	10603	10652	10665	10813												2.439	3.024	3.247	3.822	3.5				0.6429	0.7618	1.4477	0.7678	0.8871				0.168	0.106	0.201	0.301
184	180	Adhesion or extracellular matrix protein	Tuba1a; Tuba1b; Tuba1c; Tuba3a; Tuba3b	TUBA1A; TUBA1B; TUBA1C; TUBA3D; TUBA3E	§40; §40; §40; §40; §40	tubulin alpha-1A chain	P68369; P05213; P68373; P05214; NP_033475	http://www.phosphosite.org/proteinAction.do?id=2788&showAllSites=true	50; 50; 50; 50; 50	DGQMPSDK*TIGGGDD; DGQMPSDK*TIGGGDD; DGQMPSDK*TIGGGDD; DGQMPSDK*TIGGGDD; DGQMPSDK*TIGGGDD	PSDK*TIGGGDDSFNTFFSETGAGK	3	826.375				10870																3.334								0.9652								0.371
185	181	Adhesion or extracellular matrix protein	Tuba1a; Tuba1b; Tuba1c; Tuba3a; Tuba3b	TUBA1A; TUBA1B; TUBA1C; TUBA3D; TUBA3E	§40; §40; §40; §40; §40	tubulin alpha-1A chain	P68369; P05213; P68373; P05214; NP_033475	http://www.phosphosite.org/proteinAction.do?id=2788&showAllSites=true	50; 50; 50; 50; 50	DGQMPSDK*TIGGGDD; DGQMPSDK*TIGGGDD; DGQMPSDK*TIGGGDD; DGQMPSDK*TIGGGDD; DGQMPSDK*TIGGGDD	YCLEHGIQPDGQM#PSDK*TIGGGDDSFNTFFSETGAGK	4	1006.19	10751			10802		10918			10746			10814		10919			4.081			4.394		3.968			2.2392			1.461		0.2988			0.438			0.432
186	182	Adhesion or extracellular matrix protein	Tubb2a; Tubb2b; Tubb2c	TUBB2A; TUBB2B; TUBB2C	379; 379; 379	tubulin beta-2A chain	Q7TMM9; Q9CWF2; P68372	http://www.phosphosite.org/proteinAction.do?id=2137703&showAllSites=true	50; 50; 50	TAIQELFK*RISEQFT; TAIQELFK*RISEQFT; TAIQELFK*RISEQFT	M#SATFIGNSTAIQELFK*R	3	691.354	12609					12824			12604					12785			2.462					2.346			-0.0912					0.4744			0.181
187	183	Adhesion or extracellular matrix protein	Tubb2a	TUBB2A	58	tubulin beta-2A chain	Q7TMM9	http://www.phosphosite.org/proteinAction.do?id=2137703&showAllSites=true	50	YNEAAGNK*YVPRAIL	INVYYNEAAGNK*YVPR	2	956.981	7758	7718	7695	7741	7839	7823	8199	8241	7754	7713	7697	7746	7841	7828	8201	8242	4.687	3.472	4.856	4.095	4.826	4.751	4.621	4.861	0.7366	1.7393	1.3942	1.1355	0.665	1.0545	1.1146	0.1224	0.346	0.389	0.41	0.381
188	184	Adhesion or extracellular matrix protein	Tubb2a	TUBB2A	58	tubulin beta-2A chain	Q7TMM9	http://www.phosphosite.org/proteinAction.do?id=2137703&showAllSites=true	50	YNEAAGNK*YVPRAIL	INVYYNEAAGNK*YVPR	3	638.323	7759	7720	7716	7739	7871	7843			7754	7713	7697	7746	7852	7839			4.356	3.702	3.583	4.381	3.796	3.502			0.424	0.9055	0.7889	0.7481	0.3257	0.642			0.445	0.355	0.341	0.484
189	185	Adhesion or extracellular matrix protein	Tubb2a	TUBB2A	58	tubulin beta-2A chain	Q7TMM9	http://www.phosphosite.org/proteinAction.do?id=2137703&showAllSites=true	50	YNEAAGNK*YVPRAIL	INVYYNEAAGNK*YVPR	3	638.323	7772																2.098								0.2379								0.054
190	186	Adhesion or extracellular matrix protein	Tubb3	TUBB3	§58	tubulin beta-3 chain	Q9ERD7	http://www.phosphosite.org/proteinAction.do?id=4852&showAllSites=true	50	YNEASSHK*YVPRAIL	ISVYYNEASSHK*YVPR	2	977.986	6171	6126	6098	6148	6259	6217	6514	6595	6152	6118	6080	6162	6271	6211	6496	6592	1.674	2.66	2.835	3.023	1.658	3.401	2.821	1.77	1.077	1.3588	1.6504	1.1588	1.0366	0.4596	0.7496	0.5291	0.345	0.475	0.446	0.469
191	187	Adhesion or extracellular matrix protein	Tubb3	TUBB3	§58	tubulin beta-3 chain	Q9ERD7	http://www.phosphosite.org/proteinAction.do?id=4852&showAllSites=true	50	YNEASSHK*YVPRAIL	ISVYYNEASSHK*YVPR	3	652.327	6122	6088	6052	6109	6200	6181	6487	6554	6163	6129	6102	6162	6260	6222	6507	6592	3.274	3.18	3.003	2.77	2.659	2.687	3.206	2.52	0.8647	1.0013	1.1496	1.1788	0.769	0.944	0.7107	0.3056	0.226	0.329	0.264	0.27
192	188	Adhesion or extracellular matrix protein	Tubb3	TUBB3	§58	tubulin beta-3 chain	Q9ERD7	http://www.phosphosite.org/proteinAction.do?id=4852&showAllSites=true	50	YNEASSHK*YVPRAIL	ISVYYNEASSHK*YVPR	3	652.327		6177																2.018								1.1977								0.033
193	189	Adhesion or extracellular matrix protein	Tubb5	TUBB	§58	tubulin beta-5 chain	P99024	http://www.phosphosite.org/proteinAction.do?id=2786&showAllSites=true	50	YNEATGGK*YVPRAIL	ISVYYNEATGGK*YVPR	2	929.97	7724	7683	7672	7700	7814	7799	8165	8193	7732	7691	7675	7713	7830	7795	8179	8220	3.883	3.109	3.84	4.189	2.843	4.073	3.262	3.969	0.934	1.0453	1.0292	0.9184	0.6203	1.0055	0.8307	0.5623	0.424	0.457	0.487	0.46
194	190	Adhesion or extracellular matrix protein	Tubb5	TUBB	§58	tubulin beta-5 chain	P99024	http://www.phosphosite.org/proteinAction.do?id=2786&showAllSites=true	50	YNEATGGK*YVPRAIL	ISVYYNEATGGK*YVPR	3	620.316		7677		7704	7811		8171	8223		7691		7724	7830		8179	8209		4.246		3.413	4.351		5.409	4.777		1.53		1.3229	1.4305		0.7747	0.9533		0.42		0.387
195	191	Adhesion or extracellular matrix protein	Vcan	CSPG2	119	versican core protein isoform 1	Q62059	http://www.phosphosite.org/proteinAction.do?id=14097&showAllSites=true	367	DASLTMVK*LRASDAG	DASLTMVK*LR	3	392.553							4299																2.139								-0.103
196	192	Adhesion or extracellular matrix protein	Vegfa	VEGF	§324, §326, §329	vascular endothelial growth factor A isoform 1 precursor	Q00731	http://www.phosphosite.org/proteinAction.do?id=10609&showAllSites=true	43	EKKSVRGK*GKGQKRK, KSVRGKGK*GQKRKRK, RGKGKGQK*RKRKKSR	GK*GK*GQK*R	2	492.783					2176	2086	2356	2456					2184	2083	2365	2443					1.839	1.901	1.859	2.026					0.0722	0.3962	-0.1574	-0.4915
197	193	Adhesion or extracellular matrix protein	Zp3	ZP3	64	zona pellucida sperm-binding protein 3	P10761	http://www.phosphosite.org/proteinAction.do?id=15250804&showAllSites=true	46	RDLFGTGK*LVQPGDL	VVTVSRDLFGTGK*	3	474.265					3994																2.331								0.2165
198	Apoptosis
199	194	Apoptosis	Ep400	p400	3068	E1A-binding protein p400 isoform 1	Q8CHI8	http://www.phosphosite.org/proteinAction.do?id=9696&showAllSites=true	337	VRLKTPTK*PPCQ---	LKTPTK*PPCQ	2	606.326	3275	3222	3203	3219	3319	3242	3486	3577	2851	2813	2790	2839	3295	2850	3155	3619	2.158	2.095	2.528	2.258	2.31	2.408	2.061	2.244	0.0387	0.1188	0.1147	0.189	0.1923	0.1559	0.0049	-0.0322	0.127	0.076	0.243	0.123
200	195	Apoptosis	Ep400	p400	3068	E1A-binding protein p400 isoform 1	Q8CHI8	http://www.phosphosite.org/proteinAction.do?id=9696&showAllSites=true	337	VRLKTPTK*PPCQ---	LKTPTK*PPCQ	2	606.326	3188	3144	3121	3137	3236	3155					2790						1.979	2.042	1.987	1.783	1.759	1.954			0.1221	0.1609	0.1848	0.2484	0.1757	0.1535			0.012	0.102	0.119	0.058
201	196	Apoptosis	Ep400	p400	3068	E1A-binding protein p400 isoform 1	Q8CHI8	http://www.phosphosite.org/proteinAction.do?id=9696&showAllSites=true	337	VRLKTPTK*PPCQ---	TPTK*PPCQ	2	485.737		2431	2398	2456						2373	2340	2399						1.771	1.955	1.747						-0.2896	-0.1814	-0.2226						0.064	0.115	0.129
202	197	Apoptosis	Ep400	p400	3068	E1A-binding protein p400 isoform 1	Q8CHI8	http://www.phosphosite.org/proteinAction.do?id=9696&showAllSites=true	337	VRLKTPTK*PPCQ---	TPTK*PPCQ	2	485.737			2308								2340								1.917								-0.2556								0.034
203	198	Apoptosis	Gpi1	G6PI	§142	glucose-6-phosphate isomerase	P06745	http://www.phosphosite.org/proteinAction.do?id=7319&showAllSites=true	63	RVRSGDWK*GYTGKSI	SGDWK*GYTGK	2	570.77	4599	4464	4451	4472	4601	4532	4929	5016	4586	4470	4466	4490	4619	4530	4901	5023	2.826	3.193	3.08	2.769	2.802	2.62	2.847	3.341	0.0671	1.7041	1.6059	1.1912	1.0176	1.2341	-0.0293	-0.0591	0.358	0.397	0.369	0.362
204	199	Apoptosis	Ldha	LDH-A	§126	L-lactate dehydrogenase A chain isoform 2	P06151	http://www.phosphosite.org/proteinAction.do?id=4238&showAllSites=true	36	FIIPNIVK*YSPHCKL	IVK*YSPHCK	2	587.308	2177	2153	2131	2156			2433										2.242	2.104	2.164	1.982			2.462		-0.4666	0.2969	0.699	1.7692			0.9691		0.239	0.194	0.199	0.172
205	200	Apoptosis	Ldha	LDH-A	§57	L-lactate dehydrogenase A chain isoform 2	P06151	http://www.phosphosite.org/proteinAction.do?id=4238&showAllSites=true	36	LVDVMEDK*LKGEMMD	MEDK*LK	2	403.21		3781																1.678								0.193								0.002
206	201	Apoptosis	Ldha	LDH-A	§81	L-lactate dehydrogenase A chain isoform 2	P06151	http://www.phosphosite.org/proteinAction.do?id=4238&showAllSites=true	36	TPKIVSSK*DYCVTAN	IVSSK*DYCVTANSK	2	807.396	4144	4075	4067	4090	4196	4117	4436	4526	4168	4074	4092	4105	4201	4145	4450	4529	3.543	4.12	3.904	3.616	3.812	3.676	3.798	3.711	0.7025	0.6275	0.7217	0.7384	0.6213	0.9509	0.6523	0.9732	0.508	0.513	0.497	0.501
207	202	Apoptosis	Ldha	LDH-A	§81	L-lactate dehydrogenase A chain isoform 2	P06151	http://www.phosphosite.org/proteinAction.do?id=4238&showAllSites=true	36	TPKIVSSK*DYCVTAN	IVSSK*DYCVTANSK	3	538.6				4100	4198	4131						4116	4212	4145						2.817	2.259	2.953						0.5209	0.4422	0.5197						0.173
208	C2H2-type zinc finger protein
209	203	C2H2-type zinc finger protein	Arid2	ARID2	1402	AT rich interactive domain 2 (ARID, RFX-like)	Q69ZG5	http://www.phosphosite.org/proteinAction.do?id=22280&showAllSites=true	196	ATQQDTAK*GDQLERV	QDTAK*GDQLER	2	651.818	3686																2.457								-0.0269								0.003
210	204	C2H2-type zinc finger protein	Zfp366	ZNF366	447	zinc finger protein 366	NP_001004149	http://www.phosphosite.org/proteinAction.do?id=3749688&showAllSites=true	85	HKGVKEHK*CGICGRE	KGVKEHK*	2	434.256			3739																1.796								-0.2265								0.026
211	Calcium-binding protein
212	205	Calcium-binding protein	Calm1; Calm2; Calm3	calmodulin; CALM2; CALM3	§22; §22; §22	calmodulin	P62204; NP_031615; NP_031616	http://www.phosphosite.org/proteinAction.do?id=2070&showAllSites=true	17; 17; 17	EAFSLFDK*DGDGTIT; EAFSLFDK*DGDGTIT; EAFSLFDK*DGDGTIT	DK*DGDGTITTK	2	596.788	2168			2145		2120	2390								2387		2.176			2.446		2.057	2.99		0.6492			0.6291		0.7515	-0.0409		0.057			0.255
213	206	Calcium-binding protein	Calm1; Calm2; Calm3	calmodulin; CALM2; CALM3	§22; §22; §22	calmodulin	P62204; NP_031615; NP_031616	http://www.phosphosite.org/proteinAction.do?id=2070&showAllSites=true	17; 17; 17	EAFSLFDK*DGDGTIT; EAFSLFDK*DGDGTIT; EAFSLFDK*DGDGTIT	EAFSLFDK*DGDGTITTK	2	943.955	10310	10279	10310	10324	10501	10449	10964	10920	10339	10300	10348	10352	10510	10468	11006	10948	3.64	3.43	4.84	4.855	4.295	4.148	4.887	4.609	0.8459	0.7743	1.0149	0.8014	0.9084	0.707	0.5162	0.5316	0.479	0.49	0.454	0.519
214	207	Calcium-binding protein	Calm1; Calm2; Calm3	calmodulin; CALM2; CALM3	§22; §22; §22	calmodulin	P62204; NP_031615; NP_031616	http://www.phosphosite.org/proteinAction.do?id=2070&showAllSites=true	17; 17; 17	EAFSLFDK*DGDGTIT; EAFSLFDK*DGDGTIT; EAFSLFDK*DGDGTIT	EAFSLFDK*DGDGTITTK	3	629.639	10314						10968		10339						11006		3.018						3.486		0.8692						1.1384		0.249
215	208	Calcium-binding protein	Calm1; Calm2; Calm3	calmodulin; CALM2; CALM3	§95; §95; §95	calmodulin	P62204; NP_031615; NP_031616	http://www.phosphosite.org/proteinAction.do?id=2070&showAllSites=true	17; 17; 17	EAFRVFDK*DGNGYIS; EAFRVFDK*DGNGYIS; EAFRVFDK*DGNGYIS	VFDK*DGNGYISAAELR	2	898.944	8737	8696	8697	8749	8855	8836	9266	9250	8777	8725	8709	8769	8875	8851	9301	9276	4.623	4.899	4.821	4.344	4.877	4.545	5.08	4.209	0.858	0.9371	0.9582	0.9237	0.8302	0.8758	1.035	0.5603	0.387	0.404	0.397	0.392
216	209	Calcium-binding protein	Calm1; Calm2; Calm3	calmodulin; CALM2; CALM3	§95; §95; §95	calmodulin	P62204; NP_031615; NP_031616	http://www.phosphosite.org/proteinAction.do?id=2070&showAllSites=true	17; 17; 17	EAFRVFDK*DGNGYIS; EAFRVFDK*DGNGYIS; EAFRVFDK*DGNGYIS	VFDK*DGNGYISAAELR	3	599.632		8707		8751	8867			9258		8725		8769	8886			9265		2.948		2.765	2.916			3.471		0.4685		0.4083	0.7311			0.4167		0.233		0.156
217	Cell cycle regulation
218	210	Cell cycle regulation	Bub3	Bub3	§179	mitotic checkpoint protein BUB3	Q9WVA3	http://www.phosphosite.org/proteinAction.do?id=6058&showAllSites=true	37	QRRESSLK*YQTRCIR	ESSLK*YQTR	2	577.296		2893	2868	2895	2986	2927		3322		2886	2860	2888	2991	2921				2.283	1.897	2.393	2.318	2.116		2.173		0.5901	0.8033	-0.1017	2.4954	0.7054		2.6896		0.06	0.164	0.097
219	211	Cell cycle regulation	Cul3	CUL3	88	cullin-3	Q9JLV5	http://www.phosphosite.org/proteinAction.do?id=4488&showAllSites=true	89	VTEHLINK*VREDVLN	HLINK*VR	2	461.285					3527																1.703								0.2636
220	212	Cell cycle regulation	Fabp7	FABP7	101	fatty acid-binding protein, brain	P51880	http://www.phosphosite.org/proteinAction.do?id=14622&showAllSites=true	15	HVQKWDGK*ETNCTRE	WDGK*ETNCTR	2	654.785	2684	2665	2590	2640	2707			3030	2697	2640	2603	2641	2712			3055	3.097	2.083	3.002	2.716	2.175			2.417	0.3444	0.6379	0.5745	0.4193	0.5783			-0.3823	0.403	0.186	0.388	0.374
221	213	Cell cycle regulation	Fabp7	FABP7	101	fatty acid-binding protein, brain	P51880	http://www.phosphosite.org/proteinAction.do?id=14622&showAllSites=true	15	HVQKWDGK*ETNCTRE	WDGK*ETNCTR	2	654.785	2724								2697								2.3								0.3101								0.224
222	214	Cell cycle regulation	Fabp7	FABP7	38	fatty acid-binding protein, brain	P51880	http://www.phosphosite.org/proteinAction.do?id=14622&showAllSites=true	15	RQVGNVTK*PTVIISQ	QVGNVTK*PTVIISQEGGK	2	949.023	7269	7269	7259	7300	7422	7372	7700	7764	7292	7295	7290	7317	7445	7388	7717	7769	3.255	2.783	3.008	3.168	3.292	2.993	2.996	3.918	0.8932	0.8806	0.85	1.394	0.7541	0.9412	0.7572	0.2786	0.532	0.477	0.522	0.591
223	215	Cell cycle regulation	Nasp	NASP	251	nuclear autoantigenic sperm protein isoform 1	B1AU75	http://www.phosphosite.org/proteinAction.do?id=10996&showAllSites=true	84	SGAYVQNK*EFRETVE	SISGAYVQNK*EFR	2	770.891	6374	6309	6298	6334	6464	6408	6758	6837	6391	6327	6322	6349	6477	6409	6771	6856	3.482	3.231	3.261	3.216	3.568	2.953	3.361	3.065	0.8946	0.4617	0.5915	0.648	0.1469	1.0588	0.2086	-0.2918	0.388	0.316	0.358	0.337
224	216	Cell cycle regulation	Nde1	NUDE1	317	nuclear distribution protein nudE homolog 1 isoform b	Q9CZA6	http://www.phosphosite.org/proteinAction.do?id=16584&showAllSites=true	39	VGDKGSGK*RLEFGKP	RPGSTSVGDKGSGK*R	3	510.938		8767																1.658								0.8111								0.109
225	217	Cell cycle regulation	Psmb3	PSMB3	§77	proteasome subunit beta type-3	Q9R1P1	http://www.phosphosite.org/proteinAction.do?id=12596&showAllSites=true	23	RLNLYELK*EGRQIKP	LNLYELK*EGR	2	638.848			9151	9201			9800	9747			9149	9198			9818	9771			2.946	2.745			2.781	2.82			0.3292	0.5618			0.348	-0.0029			0.284	0.262
226	218	Cell cycle regulation	Ptms	PTMS	§124	parathymosin	Q66JR8	http://www.phosphosite.org/proteinAction.do?id=11269&showAllSites=true	23	AAAELSAK*DLKEKKD	SVEAAAELSAK*DLK	2	737.393	7260	7241	7151	7274	7303	7312	7866	7727	7248	7207	7202	7240	7324	7311	7684	7758	3.59	3.824	3.476	3.867	3.777	3.626	3.879	4.551	0.2111	0.243	0.4282	0.4011	0.0442	0.1588	0.3753	-0.2341	0.246	0.249	0.223	0.254
227	219	Cell cycle regulation	Ptms	PTMS	§124	parathymosin	Q66JR8	http://www.phosphosite.org/proteinAction.do?id=11269&showAllSites=true	23	AAAELSAK*DLKEKKD	SVEAAAELSAK*DLK	2	737.393	7352	7153	7248	7437	7406	7413	7663	7826	7248	7207	7202	7240	7324	7311	7684	7758	3.144	3.389	3.382	3.056	3.393	2.862	3.754	3.535	0.2579	0.224	0.4336	0.4031	0.0652	0.2294	0.114	-0.1859	0.249	0.2	0.209	0.143
228	220	Cell cycle regulation	Ptms	PTMS	§124	parathymosin	Q66JR8	http://www.phosphosite.org/proteinAction.do?id=11269&showAllSites=true	23	AAAELSAK*DLKEKKD	SVEAAAELSAK*DLK	2	737.393	7610	7360			7510		7763	7964	7248	7207			7324		7684	7758	2.732	3.08			2.754		3.487	3.003	1.2037	0.2273			0.3508		0.1527	0.1995	0.141	0.208
229	221	Cell cycle regulation	Ptms	PTMS	§124	parathymosin	Q66JR8	http://www.phosphosite.org/proteinAction.do?id=11269&showAllSites=true	23	AAAELSAK*DLKEKKD	SVEAAAELSAK*DLK	3	491.931	7228	7176	7171	7220	7314		7654		7248	7218	7202	7240	7335		7684		3.284	4.454	4.222	3.943	4.006		3.02		0.2267	0.1459	0.5056	0.4547	0.1161		0.2117		0.167	0.238	0.211	0.159
230	222	Cell cycle regulation	Ptms	PTMS	127	parathymosin	Q66JR8	http://www.phosphosite.org/proteinAction.do?id=11269&showAllSites=true	23	ELSAKDLK*EKKDKVE	SVEAAAELSAKDLK*	3	491.931						7279								7311								2.946								0.2769
231	223	Cell cycle regulation	Smc3	SMC3	§105, §106	structural maintenance of chromosomes protein 3	Q9CW03	http://www.phosphosite.org/proteinAction.do?id=8840&showAllSites=true	142	LRRVIGAK*KDQYFLD, RRVIGAKK*DQYFLDK	RVIGAK*K*DQY	2	631.349							4569	4664															2.508	2.094							1.2023	0.7719
232	224	Cell cycle regulation	Smc3	SMC3	§105, §106	structural maintenance of chromosomes protein 3	Q9CW03	http://www.phosphosite.org/proteinAction.do?id=8840&showAllSites=true	142	LRRVIGAK*KDQYFLD, RRVIGAKK*DQYFLDK	RVIGAK*K*DQYFLDKK	3	631.691	5615	5536	5521	5574	5646	5610	5897		5580	5568	5552	5601	5666	5650	5924		5.428	4.653	5.628	4.763	5.363	4.994	4.814		0.2176	0.3122	0.3069	0.1738	0.2282	0.2673	0.337		0.421	0.419	0.428	0.336
233	225	Cell cycle regulation	Smc3	SMC3	§105, §106	structural maintenance of chromosomes protein 3	Q9CW03	http://www.phosphosite.org/proteinAction.do?id=8840&showAllSites=true	142	LRRVIGAK*KDQYFLD, RRVIGAKK*DQYFLDK	RVIGAK*K*DQYFLDKK	4	474.02	5616		5544	5605					5591		5552	5601					2.621		2.794	3.052					0.1178		0.1717	0.2731					0.058		0.292	0.243
234	226	Cell cycle regulation	Smc3	SMC3	§105, §106	structural maintenance of chromosomes protein 3	Q9CW03	http://www.phosphosite.org/proteinAction.do?id=8840&showAllSites=true	142	LRRVIGAK*KDQYFLD, RRVIGAKK*DQYFLDK	VIGAK*K*DQY	2	553.298							5983	6074															2.342	1.959							0.0416	-0.4206
235	227	Cell cycle regulation	Smc3	SMC3	§105, §106	structural maintenance of chromosomes protein 3	Q9CW03	http://www.phosphosite.org/proteinAction.do?id=8840&showAllSites=true	142	LRRVIGAK*KDQYFLD, RRVIGAKK*DQYFLDK	VIGAK*K*DQYFLDKK	2	868.983	6826	6773	6770	6809	6926	6880	7240	7303	6852	6789	6784	6800	6939	6882	7244	7307	2.974	3.392	3.431	2.913	3.951	3.745	3.701	3.827	0.5095	0.4997	0.8613	0.7473	0.3247	0.4243	0.5855	0.1917	0.305	0.44	0.4	0.382
236	228	Cell cycle regulation	Smc3	SMC3	§105, §106	structural maintenance of chromosomes protein 3	Q9CW03	http://www.phosphosite.org/proteinAction.do?id=8840&showAllSites=true	142	LRRVIGAK*KDQYFLD, RRVIGAKK*DQYFLDK	VIGAK*K*DQYFLDKK	3	579.658		6780	6774	6813	6930	6874	7246	7319		6778			6939	6871		7296		2.465	1.412	1.308	1.552	1.844	1.665	2.611		0.3247	0.4358	0.6149	0.2902	0.4421	0.3316	0.0409		0.282	0.107	0.129
237	229	Cell cycle regulation	Smc3	SMC3	§105, §106	structural maintenance of chromosomes protein 3	Q9CW03	http://www.phosphosite.org/proteinAction.do?id=8840&showAllSites=true	142	LRRVIGAK*KDQYFLD, RRVIGAKK*DQYFLDK	VIGAK*K*DQYFLDKK	3	579.658						6894																1.663								0.4421
238	Cell development/differentiation
239	230	Cell development/differentiation	Brd1	BRD1	§519	bromodomain containing 1	Q571F6	http://www.phosphosite.org/proteinAction.do?id=9388&showAllSites=true	133	DEEMKAAK*EKLKYWQ	ENDEEMKAAK*EK	2	732.338	1889	1868	1811	1858		1843	2106	2156	1895	1865	1803	1852		1834	2100	2158	2.994	2.588	2.157	2.661		2.111	2.077	2.525	0.4025	0.3246	1.2257	1.2729		1.5824	0.5774	-0.0792	0.332	0.328	0.121	0.322
240	231	Cell development/differentiation	Brd1	BRD1	§519	bromodomain containing 1	Q571F6	http://www.phosphosite.org/proteinAction.do?id=9388&showAllSites=true	133	DEEMKAAK*EKLKYWQ	ENDEEMKAAK*EK	3	488.561		1877		1876						1865								2.09		2.32						-0.0075		0.0991						0.2		0.046
241	232	Cell development/differentiation	Brd1	BRD1	§523	bromodomain containing 1	Q571F6	http://www.phosphosite.org/proteinAction.do?id=9388&showAllSites=true	133	KAAKEKLK*YWQRLRH	LK*YWQR	2	468.259	5253	5123			5268				5239	5119			5262				1.857	2.159			1.942				-0.4958	0.2011			-0.1666				0.077	0.113
242	233	Cell development/differentiation	Mllt3	MLLT3	134, 137	protein AF-9 isoform 1	A2AM29	http://www.phosphosite.org/proteinAction.do?id=16140&showAllSites=true	63	PTEDFRRK*LLKAGGD, DFRRKLLK*AGGDPNR	K*LLK*AGGDPNRSIHTSSSSSSSSSSSSSSSSSSSSSSS	4	923.92						12541																3.032								0.0725
243	234	Cell development/differentiation	Rufy3; Rufy3; Rufy3; Rufy3	RUFY3; RUFY3 iso1; RUFY3 iso3; RUFY3 iso4	455; 405; 423; 455	protein RUFY3	Q9D394-2; Q9D394; Q9D394-3; Q9D394-4	http://www.phosphosite.org/proteinAction.do?id=17406&showAllSites=true	74; 53; 55; 57	LDDLRALK*HELAFKL; LDDLRALK*HELAFKL; LDDLRALK*HELAFKL; LDDLRALK*HELAFKL	ALK*HELAFK	3	366.882	4793		4734		4865	4787		5199	4790		4705			4782		5229	2.802		2.094		1.766	2.695		2.334	0.707		0.778		0.8781	0.7725		0.1654	0.413		0.155
244	Chaperone
245	235	Chaperone	Hsp90aa1; Hsp90ab1	HSP90A; HSP90B	§284; §275	heat shock protein HSP 90-alpha	P07901; P11499	http://www.phosphosite.org/proteinAction.do?id=2030&showAllSites=true	85; 83	KKKKIKEK*YIDQEEL; KTKKIKEK*YIDQEEL	EK*YIDQEELNK	2	725.857	5060						5357		5063						5352		2.648						2.332		-0.8738						-1.3432		0.301
246	236	Chaperone	Hspa8	HSC70	§108	heat shock cognate 71 kDa protein	P08109	http://www.phosphosite.org/proteinAction.do?id=4250&showAllSites=true	71	PKVQVEYK*GETKSFY	VQVEYK*GETK	2	611.819	3319	3278	3248	3255	3354	3286	3619	3699	3327	3253	3256	3273	3361	3284	3627	3696	2.793	2.632	3.028	2.688	2.858	2.728	2.925	3.068	0.107	0.4645	0.0114	0.5111	0.3172	0.5643	0.0858	-0.2038	0.309	0.273	0.352	0.202
247	237	Chaperone	Hspa8	HSC70	3	heat shock cognate 71 kDa protein	P08109	http://www.phosphosite.org/proteinAction.do?id=4250&showAllSites=true	71	-----MSK*GPAVGID	SK*GPAVGIDLGTTYSCVGVFQHGK	3	840.757	9621	9604	9630	9636	9793	9725			9635	9607		9637	9784	9731			5.391	4.695	3.782	3.994	5.086	5.346			0.9572	1.5547	1.5107	0.9243	1.1838	0.3945			0.44	0.461	0.247	0.314
248	238	Chaperone	Hspa8	HSC70	3	heat shock cognate 71 kDa protein	P08109	http://www.phosphosite.org/proteinAction.do?id=4250&showAllSites=true	71	-----MSK*GPAVGID	SK*GPAVGIDLGTTYSCVGVFQHGK	3	840.757						9730																2.358								0.3945
249	239	Chaperone	Hspa8	HSC70	§601	heat shock cognate 71 kDa protein	P08109	http://www.phosphosite.org/proteinAction.do?id=4250&showAllSites=true	71	HQQKELEK*VCNPIIT	ELEK*VCNPIITK	2	743.403	6926								6929								2.773								0.9942								0.199
250	240	Chaperone	Hspa9	HSPA9B	§300	stress-70 protein, mitochondrial	P38647	http://www.phosphosite.org/proteinAction.do?id=9558&showAllSites=true	73	ETGVDLTK*DNMALQR	ETGVDLTK*DNMALQR	2	866.93	7323						7774		7325						7783		4.546						4.6		0.2944						-0.3226		0.402
251	241	Chaperone	Hspa9	HSPA9B	§300	stress-70 protein, mitochondrial	P38647	http://www.phosphosite.org/proteinAction.do?id=9558&showAllSites=true	73	ETGVDLTK*DNMALQR	ETGVDLTK*DNM#ALQR	2	874.928	5894	5827	5826	5868	5961	5921		6312	5888	5832	5816	5854	5952	5925		6317	3.884	3.153	2.958	2.949	3.161	3.424		3.448	0.7533	1.1502	0.9706	0.6898	1.6945	0.5995		0.7499	0.376	0.378	0.293	0.32
252	242	Chaperone	Hspa9	HSPA9B	§567	stress-70 protein, mitochondrial	P38647	http://www.phosphosite.org/proteinAction.do?id=9558&showAllSites=true	73	NMVKNAEK*YAEEDRR	NAEK*YAEEDRR	2	711.834	1978	1938	1896	1937				2250	1982	1941	1906	1938				2245	2.216	2.619	2.244	2.134				2.135	0.3221	0.2715	1.2549	0.8507				-0.1784	0.139	0.162	0.053	0.195
253	243	Chaperone	Hspa9	HSPA9B	§567	stress-70 protein, mitochondrial	P38647	http://www.phosphosite.org/proteinAction.do?id=9558&showAllSites=true	73	NMVKNAEK*YAEEDRR	NAEK*YAEEDRR	3	474.892		1944																1.948								0.0226								0.077
254	244	Chaperone	Hspd1	HSP60	§125	60 kDa heat shock protein, mitochondrial	P19226	http://www.phosphosite.org/proteinAction.do?id=4249&showAllSites=true	61	VLARSIAK*EGFEKIS	SIAK*EGFEK	2	525.777		3945	3932	3976	4071	3993				3975			4091	4013				2.13	1.872	2.349	1.954	2.143				-0.5501	-0.0199	1.9591	-0.2969	-0.2759				0.148	0.026	0.125
255	245	Chaperone	Hspd1	HSP60	§130	60 kDa heat shock protein, mitochondrial	P19226	http://www.phosphosite.org/proteinAction.do?id=4249&showAllSites=true	61	IAKEGFEK*ISKGANP	EGFEK*ISK	2	490.258						4153	4530															1.679	1.827							0.1724	-0.1042
256	246	Chaperone	Hspd1	HSP60	§352	60 kDa heat shock protein, mitochondrial	P19226	http://www.phosphosite.org/proteinAction.do?id=4249&showAllSites=true	61	VGEVIVTK*DDAMLLK	VGEVIVTK*DDAM#LLK	2	844.961			8861								8863								2.836								1.1221								0.219
257	247	Chaperone	Hspd1	HSP60	369	60 kDa heat shock protein, mitochondrial	P19226	http://www.phosphosite.org/proteinAction.do?id=4249&showAllSites=true	61	GDKAHIEK*RIQEITE	AHIEK*R	2	398.227					1263								1253								1.521								0.3538
258	248	Chaperone	Hspd1	HSP60	§389	60 kDa heat shock protein, mitochondrial	P19226	http://www.phosphosite.org/proteinAction.do?id=4249&showAllSites=true	61	TSEYEKEK*LNERLAK	IQEITEQLDITTSEYEKEK*LNER	3	951.145	10155	10131	10147	10172	10330	10287	10770	10734	10174	10146	10161	10176	10345	10292	10775	10728	4.122	3.545	4.106	4.775	3.404	3.69	3.745	4.085	1.1197	1.3848	1.5086	1.066	0.9433	1.1586	1.0208	0.8861	0.263	0.325	0.31	0.448
259	249	Chaperone	Hspd1	HSP60	§389	60 kDa heat shock protein, mitochondrial	P19226	http://www.phosphosite.org/proteinAction.do?id=4249&showAllSites=true	61	TSEYEKEK*LNERLAK	IQEITEQLDITTSEYEKEK*LNER	3	951.145	10160							10716	10174							10728	3.427							2.635	1.1197							0.7785	0.301
260	250	Chaperone	Hspd1	HSP60	§455	60 kDa heat shock protein, mitochondrial	P19226	http://www.phosphosite.org/proteinAction.do?id=4249&showAllSites=true	61	IPALDSLK*PANEDQK	CIPALDSLK*PANEDQK	2	920.959	8666	8646	8631	8680	8819	8804	9190		8711	8615	8654	8703	8776	8763	9213		4.425	3.659	4.38	2.414	4.172	2.194	4.282		0.879	1.0816	1.2001	0.6862	-0.2204	0.4222	0.652		0.425	0.489	0.453	0.257
261	251	Chaperone	Hspd1	HSP60	§469	60 kDa heat shock protein, mitochondrial	P19226	http://www.phosphosite.org/proteinAction.do?id=4249&showAllSites=true	61	KIGIEIIK*RALKIPA	IGIEIIK*R	2	492.316	7773		7736	7785	7888	7856	8272	8326	8370		8335	7812	7918	8444	8916	8935	2.653		2.489	2.533	2.058	2.263	2.113	2.934	0.282		0.4782	0.5534	0.2251	0.404	0.2729	-0.0941	0.056		0.08	0.08
262	252	Chaperone	Ptges3	TEBP	§33	prostaglandin E synthase 3	Q9R0Q7	http://www.phosphosite.org/proteinAction.do?id=4822&showAllSites=true	19	DVNVNFEK*SKLTFSC	DVNVNFEK*SK	2	611.309							5669	5762							5649	5757							2.844	2.405							0.036	-0.3848
263	253	Chaperone	Stip1	STI1	§312	stress-induced-phosphoprotein 1	Q60864	http://www.phosphosite.org/proteinAction.do?id=2730&showAllSites=true	63	RIGNSYFK*EEKYKDA	IGNSYFK*EEK	2	628.812		4799				4854	5204							4859	5198			2.029				2.395	2.246			-1.3656				-0.9574	-0.6828			0.048
264	Chromatin, DNA-binding, DNA repair or DNA replication protein
265	254	Chromatin, DNA-binding, DNA repair or DNA replication protein	Adnp	ADNP	859	activity-dependent neuroprotector homeobox protein	Q9Z103	http://www.phosphosite.org/proteinAction.do?id=9197&showAllSites=true	124	DSRVNASK*TVDKKHN	VNASK*TVDKK	3	377.884								2202																1.933								-1.7027
266	255	Chromatin, DNA-binding, DNA repair or DNA replication protein	C77370	KIAA2022	1444, 1450	hypothetical protein LOC245555	Q5DTT1	http://www.phosphosite.org/proteinAction.do?id=10451&showAllSites=true	167	GNNGPTHK*KLYRHKS, HKKLYRHK*SSSKGLR	YSNVNTLGNNGPTHK*KLYRHK*	4	632.081	7863																2.329								-0.9475								0.012
267	256	Chromatin, DNA-binding, DNA repair or DNA replication protein	Cbx3	CBX3	§44	chromobox protein homolog 3	P23198	http://www.phosphosite.org/proteinAction.do?id=8646&showAllSites=true	21	DRRVVNGK*VEYFLKW	VVNGK*VEYFLK	2	669.377		9235	9261				9896			9231	9248				9884			2.877	2.892				3.01			0.3451	0.2868				0.1321			0.308	0.254
268	257	Chromatin, DNA-binding, DNA repair or DNA replication protein	H2afv; H2afz	H2AFV; H2AZ	§5, §8; §5, §8	histone H2A.V	Q3THW5; P0C0S6	http://www.phosphosite.org/proteinAction.do?id=9917204&showAllSites=true	14; 14	---MAGGK*AGKDSGK, MAGGKAGK*DSGKAKA; ---MAGGK*AGKDSGK, MAGGKAGK*DSGKAKT	AGGK*AGK*DSGK	2	530.275		1393	1375	1382	1436	1384		1614		1392	1374	1390	1435			1785		3.442	3.563	3.478	3.275	3.587		3.703		-0.0155	0.1779	0.3233	0.3695	0.1138		-0.5941		0.418	0.408	0.418
269	258	Chromatin, DNA-binding, DNA repair or DNA replication protein	H2afv; H2afz	H2AFV; H2AZ	§5, §8, §12; §5, §8, §12	histone H2A.V	Q3THW5; P0C0S6	http://www.phosphosite.org/proteinAction.do?id=9917204&showAllSites=true	14; 14	---MAGGK*AGKDSGK, MAGGKAGK*DSGKAKA, KAGKDSGK*AKAKAVS; ---MAGGK*AGKDSGK, MAGGKAGK*DSGKAKT, KAGKDSGK*AKTKAVS	AGGK*AGK*DSGK*AK	2	650.846	1678	1638	1629	1624	1691	1617	1850	1905									3.534	3.457	3.567	3.159	3.249	3.347	3.032	3.27	0.6189	0.6474	0.6858	0.7404	0.5021	0.622	0.3345	-0.0684	0.208	0.254	0.277	0.223
270	259	Chromatin, DNA-binding, DNA repair or DNA replication protein	H2afv; H2afz	H2AFV; H2AZ	§5, §8, §12; §5, §8, §12	histone H2A.V	Q3THW5; P0C0S6	http://www.phosphosite.org/proteinAction.do?id=9917204&showAllSites=true	14; 14	---MAGGK*AGKDSGK, MAGGKAGK*DSGKAKA, KAGKDSGK*AKAKAVS; ---MAGGK*AGKDSGK, MAGGKAGK*DSGKAKT, KAGKDSGK*AKTKAVS	AGGK*AGK*DSGK*AK	3	434.233		1646	1630		1701	1626		1912										3.031	3.256		3.437	3.165		3.8		0.1769	0.3214		0.3406	0.2437		-0.2529		0.181	0.149
271	260	Chromatin, DNA-binding, DNA repair or DNA replication protein	H2afv	H2AFV	§5, §8, §12, §14	histone H2A.V	Q3THW5	http://www.phosphosite.org/proteinAction.do?id=9917204&showAllSites=true	14	---MAGGK*AGKDSGK, MAGGKAGK*DSGKAKA, KAGKDSGK*AKAKAVS, GKDSGKAK*AKAVSRS	AGGK*AGK*DSGK*AK*AK	2	771.418	2332	2273	2270	2329	2389	2311	2571										3.049	4.101	3.34	3.68	2.908	3.341	3.58		0.5037	0.4148	1.2495	0.2812	0.6807	0.8493	0.0918		0.078	0.302	0.249	0.363
272	261	Chromatin, DNA-binding, DNA repair or DNA replication protein	H2afv	H2AFV	§5, §8, §12, §14	histone H2A.V	Q3THW5	http://www.phosphosite.org/proteinAction.do?id=9917204&showAllSites=true	14	---MAGGK*AGKDSGK, MAGGKAGK*DSGKAKA, KAGKDSGK*AKAKAVS, GKDSGKAK*AKAVSRS	AGGK*AGK*DSGK*AK*AK	3	514.614			2269	2319		2298	2563												3.91	4.453		3.7	4.197				0.7683	0.9369		0.8772	0.3311				0.345	0.332
273	262	Chromatin, DNA-binding, DNA repair or DNA replication protein	H2afv; H2afz	H2AFV; H2AZ	§8, §12; §8, §12	histone H2A.V	Q3THW5; P0C0S6	http://www.phosphosite.org/proteinAction.do?id=9917204&showAllSites=true	14; 14	MAGGKAGK*DSGKAKA, KAGKDSGK*AKAKAVS; MAGGKAGK*DSGKAKT, KAGKDSGK*AKTKAVS	AGK*DSGK*AK	2	473.254					1403	1363		1592					1402	1350		1591					2.885	2.298		2.694					-0.0624	0.0328		-0.8694
274	263	Chromatin, DNA-binding, DNA repair or DNA replication protein	H2afv	H2AFV	§8, §12, §14	histone H2A.V	Q3THW5	http://www.phosphosite.org/proteinAction.do?id=9917204&showAllSites=true	14	MAGGKAGK*DSGKAKA, KAGKDSGK*AKAKAVS, GKDSGKAK*AKAVSRS	AGK*DSGK*AK*AK	2	593.825	1710	1670	1661		1724	1654	1906	1935	1708	1667	1660		1721	1658	1902	1933	3.506	3.297	3.275		3.501	3.261	3.051	3.118	0.3982	0.656	0.4673		0.126	1.2771	0.3636	-0.0384	0.286	0.354	0.319
275	264	Chromatin, DNA-binding, DNA repair or DNA replication protein	H2afy2	H2AFY2	163	core histone macro-H2A.2	Q8CCK0	http://www.phosphosite.org/proteinAction.do?id=17985&showAllSites=true	40	TSKKSKAK*DSDKEGT	AK*DSDKEGTSNSTSEDGPGDGFTILSSK	3	958.104	6917	6883	6893	6917	7077	7013	7395	7475	7017	6976	6960	6998	7137	7069	7431	7516	5.31	5.161	5.087	4.54	5.944	5.894	7.458	6.41	0.6316	1.0323	1.1127	1.0361	0.7019	0.7726	0.9383	0.5633	0.373	0.481	0.559	0.433
276	265	Chromatin, DNA-binding, DNA repair or DNA replication protein	H2afy2	H2AFY2	163	core histone macro-H2A.2	Q8CCK0	http://www.phosphosite.org/proteinAction.do?id=17985&showAllSites=true	40	TSKKSKAK*DSDKEGT	AK*DSDKEGTSNSTSEDGPGDGFTILSSK	3	958.104	6971						7411		7017						7431		5.224						6.23		0.7889						0.9575		0.496
277	266	Chromatin, DNA-binding, DNA repair or DNA replication protein	H2afy2	H2AFY2	167	core histone macro-H2A.2	Q8CCK0	http://www.phosphosite.org/proteinAction.do?id=17985&showAllSites=true	40	SKAKDSDK*EGTSNST	AKDSDK*EGTSNSTSEDGPGDGFTILSSK	3	958.104	7069	6978	6985	7012		7105			7017	6976	6960	6998		7069			5.791	6.518	6.049	6.857		5.003			0.7611	0.9571	1.0793	1.0048		0.805			0.378	0.452	0.436	0.464
278	267	Chromatin, DNA-binding, DNA repair or DNA replication protein	H2afy2	H2AFY2	167	core histone macro-H2A.2	Q8CCK0	http://www.phosphosite.org/proteinAction.do?id=17985&showAllSites=true	40	SKAKDSDK*EGTSNST	AKDSDK*EGTSNSTSEDGPGDGFTILSSK	3	958.104				7016								6998								6.285								1.0048								0.519
279	268	Chromatin, DNA-binding, DNA repair or DNA replication protein	H2afy2	H2AFY2	167	core histone macro-H2A.2	Q8CCK0	http://www.phosphosite.org/proteinAction.do?id=17985&showAllSites=true	40	SKAKDSDK*EGTSNST	DSDK*EGTSNSTSEDGPGDGFTILSSK	3	891.726	8619								8634								4.023								-0.7								0.343
280	269	Chromatin, DNA-binding, DNA repair or DNA replication protein	H2afz	H2AZ	§5, §8, §12, §14	histone H2A.Z	P0C0S6	http://www.phosphosite.org/proteinAction.do?id=12274&showAllSites=true	14	---MAGGK*AGKDSGK, MAGGKAGK*DSGKAKT, KAGKDSGK*AKTKAVS, GKDSGKAK*TKAVSRS	AGGK*AGK*DSGK*AK*TK	2	786.423	2257	2216	2195	2226	2293	2228	2506	2559	2274		2208	2245	2316	2247	2522	2576	4.142	3.875	4.435	4.424	4.571	4.071	4.287	4.23	0.5235	0.6806	0.7328	0.8868	0.7684	0.7742	0.1793	-0.1649	0.462	0.395	0.456	0.473
281	270	Chromatin, DNA-binding, DNA repair or DNA replication protein	H2afz	H2AZ	§5, §8, §12, §14	histone H2A.Z	P0C0S6	http://www.phosphosite.org/proteinAction.do?id=12274&showAllSites=true	14	---MAGGK*AGKDSGK, MAGGKAGK*DSGKAKT, KAGKDSGK*AKTKAVS, GKDSGKAK*TKAVSRS	AGGK*AGK*DSGK*AK*TK	3	524.618	2264	2215	2199	2225	2295	2226	2502	2564	2284			2245	2316	2247	2522	2582	4.554	3.312	4.151	4.919	4.215	4.694	4.734	4.238	-0.0147	-0.0764	-0.0154	0.0584	0.1055	0.0769	-0.252	-0.4601	0.379	0.313	0.316	0.372
282	271	Chromatin, DNA-binding, DNA repair or DNA replication protein	H2afz	H2AZ	§8, §12, §14	histone H2A.Z	P0C0S6	http://www.phosphosite.org/proteinAction.do?id=12274&showAllSites=true	14	MAGGKAGK*DSGKAKT, KAGKDSGK*AKTKAVS, GKDSGKAK*TKAVSRS	AGK*DSGK*AK*TK	2	608.83	1672	1636	1617	1612	1679		1844			1634	1627	1621	1688		1848		2.001	2.529	3.299	3.162	3.187		2.432		0.0089	0.1215	0.3105	0.3163	0.253		0.1404		0.128	0.194	0.314	0.312
283	272	Chromatin, DNA-binding, DNA repair or DNA replication protein	Hist1h1b; Hist1h1d; Hist1h1e	H1B; H1D; H1E	§90; §91; §90	histone H1.5	P43276; P43277; P43274	http://www.phosphosite.org/proteinAction.do?id=8660&showAllSites=true	23; 22; 22	GLKSLVSK*GTLVQTK; GLKSLVSK*GTLVQTK; GLKSLVSK*GTLVQTK	SLVSK*GTLVQTK	2	651.885							6631	6704							6628	6702							2.986	2.952							0.2298	-0.0604
284	273	Chromatin, DNA-binding, DNA repair or DNA replication protein	Hist1h1c	H1C	175, 176, 178	histone H1.2	P15864	http://www.phosphosite.org/proteinAction.do?id=5384&showAllSites=true	21	KKVAKSPK*KAKVTKP, KVAKSPKK*AKVTKPK, AKSPKKAK*VTKPKKV	SPK*K*AK*VTK	2	556.837				2559	2643		2849													1.978	1.776		2.167					0.3553	0.0416		-0.2136					0.034
285	274	Chromatin, DNA-binding, DNA repair or DNA replication protein	Hist1h1c; Hist1h1d; Hist1h1e; Hist1h1t	H1C; H1D; H1E; H1T	75; 76; 75; 77	histone H1.2	P15864; P43277; P43274; Q07133	http://www.phosphosite.org/proteinAction.do?id=5384&showAllSites=true	21; 22; 22; 22	AAGYDVEK*NNSRIKL; AAGYDVEK*NNSRIKL; AAGYDVEK*NNSRIKL; AAGYDVEK*NNSRIKL	ALAAAGYDVEK*NNSR	2	810.903							5208	5301							5198	5284							2.952	2.888							-0.8635	-1.731
286	275	Chromatin, DNA-binding, DNA repair or DNA replication protein	Hist1h2ba; Hist1h2bb; Hist1h2bc; Hist1h2be; Hist1h2bh; Hist1h2bm; Hist1h2bn; Hist1h2bp; Hist2h2bb; Hist2h2be; Hist3h2ba; Hist3h2bb-ps	H2B1A; H2B1N; H2B1C; H2B1K; H2B2E; H2B1D; H2B; Hist1h2bp; H2B1H; H2B1L; Hist3h2ba; HIST3H2BB	§110; §109; §109; §109; §109; §109; §109; §109; §109; §109; §109; §109	histone H2B type 1-A	P70696; Q64475; Q6ZWY9; NP_001171124; Q64478; P10854; P10853; Q8CGP2; Q64525; Q64524; Q9D2U9; Q8CGP0	http://www.phosphosite.org/proteinAction.do?id=15481&showAllSites=true	14; 14; 14; 14; 14; 14; 14; 14; 14; 14; 14; 14	LLPGELAK*HAVSEGT; LLPGELAK*HAVSEGT; LLPGELAK*HAVSEGT; LLPGELAK*HAVSEGT; LLPGELAK*HAVSEGT; LLPGELAK*HAVSEGT; LLPGELAK*HAVSEGT; LLPGELAK*HAVSEGT; LLPGELAK*HAVSEGT; LLPGELAK*HAVSEGT; LLPGELAK*HAVSEGT; LLPGELAK*HAVSEGT	LLLPGELAK*HAVSEGTK	3	602.344	9221			9234				9755								9771	2.333			1.779				2.513	0.485			0.4102				0.0651	0.08			0.042
287	276	Chromatin, DNA-binding, DNA repair or DNA replication protein	Hist1h2ba; Hist1h2bb; Hist1h2bc; Hist1h2be; Hist1h2bh; Hist1h2bm; Hist1h2bn; Hist1h2bp; Hist2h2bb; Hist2h2be; Hist3h2ba; Hist3h2bb-ps	H2B1A; H2B1N; H2B1C; H2B1K; H2B2E; H2B1D; H2B; Hist1h2bp; H2B1H; H2B1L; Hist3h2ba; HIST3H2BB	§118; §117; §117; §117; §117; §117; §117; 117; §117; §117; 117; §117	histone H2B type 1-A	P70696; Q64475; Q6ZWY9; NP_001171124; Q64478; P10854; P10853; Q8CGP2; Q64525; Q64524; Q9D2U9; Q8CGP0	http://www.phosphosite.org/proteinAction.do?id=15481&showAllSites=true	14; 14; 14; 14; 14; 14; 14; 14; 14; 14; 14; 14	HAVSEGTK*AVTKYTS; HAVSEGTK*AVTKYTS; HAVSEGTK*AVTKYTS; HAVSEGTK*AVTKYTS; HAVSEGTK*AVTKYTS; HAVSEGTK*AVTKYTS; HAVSEGTK*AVTKYTS; HAVSEGTK*AVTKYTS; HAVSEGTK*AVTKYTS; HAVSEGTK*AVTKYTS; HAVSEGTK*AVTKYTS; HAVSEGTK*AVTKYTS	HAVSEGTK*AVTK	2	635.343				1550								1830								2.995								0.8346								0.393
288	277	Chromatin, DNA-binding, DNA repair or DNA replication protein	Hist1h2ba; Hist1h2bb; Hist1h2bc; Hist1h2be; Hist1h2bh; Hist1h2bm; Hist1h2bn; Hist1h2bp; Hist2h2bb; Hist3h2ba; Hist3h2bb-ps	H2B1A; H2B1N; H2B1C; H2B1K; H2B2E; H2B1D; H2B; Hist1h2bp; H2B1H; Hist3h2ba; HIST3H2BB	§122; §121; §121; §121; §121; §121; §121; §121; §121; §121; §121	histone H2B type 1-A	P70696; Q64475; Q6ZWY9; NP_001171124; Q64478; P10854; P10853; Q8CGP2; Q64525; Q9D2U9; Q8CGP0	http://www.phosphosite.org/proteinAction.do?id=15481&showAllSites=true	14; 14; 14; 14; 14; 14; 14; 14; 14; 14; 14	EGTKAVTK*YTSSK--; EGTKAVTK*YTSSK--; EGTKAVTK*YTSSK--; EGTKAVTK*YTSSK--; EGTKAVTK*YTSSK--; EGTKAVTK*YTSSK--; EGTKAVTK*YTSSK--; EGTKAVTK*YTSSK--; EGTKAVTK*YTSSK--; EGTKAVTK*YTSSK--; EGTKAVTK*YTSSK--	AVTK*YTSSK	2	513.777	1961	1912	1882	1919	2018	1902	2178	2225	1971	1941	1914	1938	2006	1930	2208	2256	2.58	2.231	2.848	2.448	2.741	2.3	2.354	2.44	-0.2619	-0.1401	0.0264	0.0206	0.156	0.1774	-0.1772	-0.635	0.352	0.233	0.268	0.28
289	278	Chromatin, DNA-binding, DNA repair or DNA replication protein	Hist1h2bb; Hist1h2bc; Hist1h2be; Hist1h2bh; Hist1h2bm; Hist1h2bn; Hist2h2bb; Hist2h2be; Hist3h2bb-ps	H2B1N; H2B1C; H2B1K; H2B2E; H2B1D; H2B; H2B1H; H2B1L; HIST3H2BB	§12, §13; §12, §13; §12, §13; §12, §13; §12, §13; §12, §13; §12, §13; §12, §13; §12, §13	histone H2B type 1-B	Q64475; Q6ZWY9; NP_001171124; Q64478; P10854; P10853; Q64525; Q64524; Q8CGP0	http://www.phosphosite.org/proteinAction.do?id=8395&showAllSites=true	14; 14; 14; 14; 14; 14; 14; 14; 14	SKSAPAPK*KGSKKAI, KSAPAPKK*GSKKAIS; AKSAPAPK*KGSKKAV, KSAPAPKK*GSKKAVT; AKSAPAPK*KGSKKAV, KSAPAPKK*GSKKAVT; AKSAPAPK*KGSKKAL, KSAPAPKK*GSKKALT; TKSAPAPK*KGSKKAV, KSAPAPKK*GSKKAVT; AKSAPAPK*KGSKKAV, KSAPAPKK*GSKKAVT; AKSAPAPK*KGSKKAV, KSAPAPKK*GSKKAVT; AKSAPAPK*KGSKKAV, KSAPAPKK*GSKKAVT; SKSAPAPK*KGSKKAV, KSAPAPKK*GSKKAVT	SAPAPK*K*GSK	2	527.798					1582																1.644								-0.1341
290	279	Chromatin, DNA-binding, DNA repair or DNA replication protein	Hist1h2bb; Hist1h2bc; Hist1h2be; Hist1h2bh; Hist1h2bm; Hist1h2bn; Hist2h2bb; Hist2h2be; Hist3h2bb-ps	H2B1N; H2B1C; H2B1K; H2B2E; H2B1D; H2B; H2B1H; H2B1L; HIST3H2BB	§12, §13, §16; §12, §13, §16; §12, §13, §16; §12, §13, §16; §12, §13, §16; §12, §13, §16; §12, §13, §16; §12, §13, §16; §12, §13, §16	histone H2B type 1-B	Q64475; Q6ZWY9; NP_001171124; Q64478; P10854; P10853; Q64525; Q64524; Q8CGP0	http://www.phosphosite.org/proteinAction.do?id=8395&showAllSites=true	14; 14; 14; 14; 14; 14; 14; 14; 14	SKSAPAPK*KGSKKAI, KSAPAPKK*GSKKAIS, PAPKKGSK*KAISKAQ; AKSAPAPK*KGSKKAV, KSAPAPKK*GSKKAVT, PAPKKGSK*KAVTKAQ; AKSAPAPK*KGSKKAV, KSAPAPKK*GSKKAVT, PAPKKGSK*KAVTKAQ; AKSAPAPK*KGSKKAL, KSAPAPKK*GSKKALT, PAPKKGSK*KALTKAQ; TKSAPAPK*KGSKKAV, KSAPAPKK*GSKKAVT, PAPKKGSK*KAVTKAQ; AKSAPAPK*KGSKKAV, KSAPAPKK*GSKKAVT, PAPKKGSK*KAVTKAQ; AKSAPAPK*KGSKKAV, KSAPAPKK*GSKKAVT, PAPKKGSK*KAVTKVQ; AKSAPAPK*KGSKKAV, KSA…	SAPAPK*K*GSK*K	2	612.851	1864	1823	1815	1832	1873	1814	2057	2127	1851	1843	1792	1841	1897	1812	2067	2114	2.225	2.33	2.197	2.164	2.162	2.129	2.127	2.193	-0.1577	-0.1291	0.1191	0.0546	-0.0507	0.2343	-0.0874	-0.3095	0.236	0.344	0.314	0.319
291	280	Chromatin, DNA-binding, DNA repair or DNA replication protein	Hist1h2bb; Hist1h2bc; Hist1h2be; Hist1h2bh; Hist1h2bm; Hist1h2bn; Hist2h2bb; Hist2h2be; Hist3h2bb-ps	H2B1N; H2B1C; H2B1K; H2B2E; H2B1D; H2B; H2B1H; H2B1L; HIST3H2BB	§12, §13, §16; §12, §13, §16; §12, §13, §16; §12, §13, §16; §12, §13, §16; §12, §13, §16; §12, §13, §16; §12, §13, §16; §12, §13, §16	histone H2B type 1-B	Q64475; Q6ZWY9; NP_001171124; Q64478; P10854; P10853; Q64525; Q64524; Q8CGP0	http://www.phosphosite.org/proteinAction.do?id=8395&showAllSites=true	14; 14; 14; 14; 14; 14; 14; 14; 14	SKSAPAPK*KGSKKAI, KSAPAPKK*GSKKAIS, PAPKKGSK*KAISKAQ; AKSAPAPK*KGSKKAV, KSAPAPKK*GSKKAVT, PAPKKGSK*KAVTKAQ; AKSAPAPK*KGSKKAV, KSAPAPKK*GSKKAVT, PAPKKGSK*KAVTKAQ; AKSAPAPK*KGSKKAL, KSAPAPKK*GSKKALT, PAPKKGSK*KALTKAQ; TKSAPAPK*KGSKKAV, KSAPAPKK*GSKKAVT, PAPKKGSK*KAVTKAQ; AKSAPAPK*KGSKKAV, KSAPAPKK*GSKKAVT, PAPKKGSK*KAVTKAQ; AKSAPAPK*KGSKKAV, KSAPAPKK*GSKKAVT, PAPKKGSK*KAVTKVQ; AKSAPAPK*KGSKKAV, KSA…	SAPAPK*K*GSK*K	2	612.851	1839		1782	1826		1799		2095	1851		1792	1841		1812		2114	1.832		1.768	1.678		1.781		2.121	-0.1577		0.1191	0.0546		0.2343		-0.3095	0.191		0.238	0.181
292	281	Chromatin, DNA-binding, DNA repair or DNA replication protein	Hist1h2bb; Hist1h2bc; Hist1h2be; Hist1h2bh; Hist1h2bm; Hist1h2bn; Hist2h2bb; Hist2h2be; Hist3h2bb-ps	H2B1N; H2B1C; H2B1K; H2B2E; H2B1D; H2B; H2B1H; H2B1L; HIST3H2BB	§12, §13, §16; §12, §13, §16; §12, §13, §16; §12, §13, §16; §12, §13, §16; §12, §13, §16; §12, §13, §16; §12, §13, §16; §12, §13, §16	histone H2B type 1-B	Q64475; Q6ZWY9; NP_001171124; Q64478; P10854; P10853; Q64525; Q64524; Q8CGP0	http://www.phosphosite.org/proteinAction.do?id=8395&showAllSites=true	14; 14; 14; 14; 14; 14; 14; 14; 14	SKSAPAPK*KGSKKAI, KSAPAPKK*GSKKAIS, PAPKKGSK*KAISKAQ; AKSAPAPK*KGSKKAV, KSAPAPKK*GSKKAVT, PAPKKGSK*KAVTKAQ; AKSAPAPK*KGSKKAV, KSAPAPKK*GSKKAVT, PAPKKGSK*KAVTKAQ; AKSAPAPK*KGSKKAL, KSAPAPKK*GSKKALT, PAPKKGSK*KALTKAQ; TKSAPAPK*KGSKKAV, KSAPAPKK*GSKKAVT, PAPKKGSK*KAVTKAQ; AKSAPAPK*KGSKKAV, KSAPAPKK*GSKKAVT, PAPKKGSK*KAVTKAQ; AKSAPAPK*KGSKKAV, KSAPAPKK*GSKKAVT, PAPKKGSK*KAVTKVQ; AKSAPAPK*KGSKKAV, KSA…	SAPAPK*K*GSK*K	3	408.903			1794			1815	2058				1792			1812					1.84			2.264	1.823				0.3314			0.4637	0.0881				0.192
293	282	Chromatin, DNA-binding, DNA repair or DNA replication protein	Hist1h2bb	H2B1N	§12, §13, §16, §17	histone H2B type 1-B	Q64475	http://www.phosphosite.org/proteinAction.do?id=8395&showAllSites=true	14	SKSAPAPK*KGSKKAI, KSAPAPKK*GSKKAIS, PAPKKGSK*KAISKAQ, APKKGSKK*AISKAQK	SAPAPK*K*GSK*K*AISK	2	833.48			3825	3859	3947	3887	4160	4242			3459	3467	3554	3494	3780	3839			2.563	2.484	3.092	2.382	2.839	2.419			0.3938	0.7323	0.0769	0.0282	0.2611	0.4184			0.363	0.424
294	283	Chromatin, DNA-binding, DNA repair or DNA replication protein	Hist1h2bb	H2B1N	§12, §13, §16, §17	histone H2B type 1-B	Q64475	http://www.phosphosite.org/proteinAction.do?id=8395&showAllSites=true	14	SKSAPAPK*KGSKKAI, KSAPAPKK*GSKKAIS, PAPKKGSK*KAISKAQ, APKKGSKK*AISKAQK	SAPAPK*K*GSK*K*AISK	3	555.989		3825					4146	4228							3769	3839		2.164					2.352	2.991		0.332					0.4268	-0.0372		0.087
295	284	Chromatin, DNA-binding, DNA repair or DNA replication protein	Hist1h2bb	H2B1N	§13, §16, §17	histone H2B type 1-B	Q64475	http://www.phosphosite.org/proteinAction.do?id=8395&showAllSites=true	14	KSAPAPKK*GSKKAIS, PAPKKGSK*KAISKAQ, APKKGSKK*AISKAQK	K*GSK*K*AISK	2	536.822	2173	2154	2143	2160	2223	2144	2437	2490	1862	1854	1803	1852	1908	1823	2078	2125	3.419	3.066	3.655	3.485	2.372	3.247	3.464	3.15	-0.3874	-0.2662	-0.2215	-0.1003	-0.2439	-0.1432	-0.4135	-0.8359	0.182	0.191	0.183	0.193
296	285	Chromatin, DNA-binding, DNA repair or DNA replication protein	Hist1h2bb	H2B1N	§13, §16, §17	histone H2B type 1-B	Q64475	http://www.phosphosite.org/proteinAction.do?id=8395&showAllSites=true	14	KSAPAPKK*GSKKAIS, PAPKKGSK*KAISKAQ, APKKGSKK*AISKAQK	K*GSK*K*AISK	2	536.822							2422	2533							2078	2125							2.838	2.445							-0.4135	-0.8359
297	286	Chromatin, DNA-binding, DNA repair or DNA replication protein	Hist1h2bb	H2B1N	§13, §16, §17, §21	histone H2B type 1-B	Q64475	http://www.phosphosite.org/proteinAction.do?id=8395&showAllSites=true	14	KSAPAPKK*GSKKAIS, PAPKKGSK*KAISKAQ, APKKGSKK*AISKAQK, GSKKAISK*AQKKDGK	K*GSK*K*AISK*AQK	2	721.422	3298	3255	3240	3259	3338	3279	3587	3659	2818	2770	2757	2795	2866	2807	3083	3154	4.238	4.253	4.616	4.033	4.723	4.088	4.326	4.304	0.2479	0.6987	0.8471	0.7764	0.7549	0.8007	0.2541	-0.0337	0.394	0.365	0.371	0.337
298	287	Chromatin, DNA-binding, DNA repair or DNA replication protein	Hist1h2bb	H2B1N	§13, §16, §17, §21	histone H2B type 1-B	Q64475	http://www.phosphosite.org/proteinAction.do?id=8395&showAllSites=true	14	KSAPAPKK*GSKKAIS, PAPKKGSK*KAISKAQ, APKKGSKK*AISKAQK, GSKKAISK*AQKKDGK	K*GSK*K*AISK*AQK	3	481.284	3301	3256	3246	3264		3285	3586	3657	2818	2770	2757	2795		2807	3083	3154	3.926	3.624	3.728	4.016		3.898	2.863	2.857	0.3006	0.2403	-2.183	0.4116		0.4213	0.2909	-0.0926	0.318	0.199	0.272	0.248
299	288	Chromatin, DNA-binding, DNA repair or DNA replication protein	Hist1h2bb	H2B1N	§17, §21	histone H2B type 1-B	Q64475	http://www.phosphosite.org/proteinAction.do?id=8395&showAllSites=true	14	APKKGSKK*AISKAQK, GSKKAISK*AQKKDGK	K*AISK*AQK	2	479.29	1940	1928	1889	1917	1991	1907	2168	2210	1567	1590	1572	1533	1600	1515	1793	1840	2.228	2.922	2.477	2.187	2.533	2.356	2.357	2.18	-0.1619	0.1409	0.0219	-0.0627	-0.0345	0.4521	-0.3102	-0.6151	0.104	0.108	0.093	0.062
300	289	Chromatin, DNA-binding, DNA repair or DNA replication protein	Hist1h2bb	H2B1N	§17, §21	histone H2B type 1-B	Q64475	http://www.phosphosite.org/proteinAction.do?id=8395&showAllSites=true	14	APKKGSKK*AISKAQK, GSKKAISK*AQKKDGK	K*AISK*AQKK	2	543.337							1704																2.151								0.0386
301	290	Chromatin, DNA-binding, DNA repair or DNA replication protein	Hist1h2bb; Hist1h2bc; Hist1h2be; Hist1h2bh; Hist1h2bm; Hist1h2bn; Hist1h2bp; Hist1h2bp; Hist2h2bb	H2B1N; H2B1C; H2B1K; H2B2E; H2B1D; H2B; Hist1h2bp; Hist1h2bp iso3; H2B1H	§35; §35; §35; 35; §35; 35; 35; 35; §35	histone H2B type 1-B	Q64475; Q6ZWY9; NP_001171124; Q64478; P10854; P10853; Q8CGP2; Q8C622; Q64525	http://www.phosphosite.org/proteinAction.do?id=8395&showAllSites=true	14; 14; 14; 14; 14; 14; 14; 16; 14	KKRKRSRK*ESYSVYV; KKRKRSRK*ESYSVYV; KKRKRSRK*ESYSVYV; KKRKRSRK*ESYSVYV; KKRKRSRK*ESYSVYV; KKRKRSRK*ESYSVYV; KKRKRSRK*ESYSVYV; EERKRSRK*ESYSVYV; KKRKRSRK*ESYSVYV	K*ESYSVYVYK	2	654.33		6073								6074								1.923								0.152								0.03
302	291	Chromatin, DNA-binding, DNA repair or DNA replication protein	Hist1h2bc; Hist1h2be; Hist1h2bm; Hist1h2bn; Hist2h2bb; Hist2h2be; Hist3h2bb-ps	H2B1C; H2B1K; H2B1D; H2B; H2B1H; H2B1L; HIST3H2BB	§12, §13, §16, §17; §12, §13, §16, §17; §12, §13, §16, §17; §12, §13, §16, §17; §12, §13, §16, §17; §12, §13, §16, §17; §12, §13, §16, §17	histone H2B type 1-C/E/G	Q6ZWY9; NP_001171124; P10854; P10853; Q64525; Q64524; Q8CGP0	http://www.phosphosite.org/proteinAction.do?id=8393&showAllSites=true	14; 14; 14; 14; 14; 14; 14	AKSAPAPK*KGSKKAV, KSAPAPKK*GSKKAVT, PAPKKGSK*KAVTKAQ, APKKGSKK*AVTKAQK; AKSAPAPK*KGSKKAV, KSAPAPKK*GSKKAVT, PAPKKGSK*KAVTKAQ, APKKGSKK*AVTKAQK; TKSAPAPK*KGSKKAV, KSAPAPKK*GSKKAVT, PAPKKGSK*KAVTKAQ, APKKGSKK*AVTKAQK; AKSAPAPK*KGSKKAV, KSAPAPKK*GSKKAVT, PAPKKGSK*KAVTKAQ, APKKGSKK*AVTKAQK; AKSAPAPK*KGSKKAV, KSAPAPKK*GSKKAVT, PAPKKGSK*KAVTKVQ, APKKGSKK*AVTKVQK; AKSAPAPK*KGSKKAV, KSAPAPKK*GSKKAVT, PAP…	SAPAPK*K*GSK*K*AVTK	2	833.48	3492	3461	3457					3849	3495	3464	3459					3839	2.455	3.092	3.173					3.184	0.4778	1.0571	1.0187					1.1855	0.292	0.481	0.488
303	292	Chromatin, DNA-binding, DNA repair or DNA replication protein	Hist1h2bc; Hist1h2be; Hist1h2bm; Hist1h2bn; Hist2h2bb; Hist2h2be; Hist3h2bb-ps	H2B1C; H2B1K; H2B1D; H2B; H2B1H; H2B1L; HIST3H2BB	§12, §13, §16, §17; §12, §13, §16, §17; §12, §13, §16, §17; §12, §13, §16, §17; §12, §13, §16, §17; §12, §13, §16, §17; §12, §13, §16, §17	histone H2B type 1-C/E/G	Q6ZWY9; NP_001171124; P10854; P10853; Q64525; Q64524; Q8CGP0	http://www.phosphosite.org/proteinAction.do?id=8393&showAllSites=true	14; 14; 14; 14; 14; 14; 14	AKSAPAPK*KGSKKAV, KSAPAPKK*GSKKAVT, PAPKKGSK*KAVTKAQ, APKKGSKK*AVTKAQK; AKSAPAPK*KGSKKAV, KSAPAPKK*GSKKAVT, PAPKKGSK*KAVTKAQ, APKKGSKK*AVTKAQK; TKSAPAPK*KGSKKAV, KSAPAPKK*GSKKAVT, PAPKKGSK*KAVTKAQ, APKKGSKK*AVTKAQK; AKSAPAPK*KGSKKAV, KSAPAPKK*GSKKAVT, PAPKKGSK*KAVTKAQ, APKKGSKK*AVTKAQK; AKSAPAPK*KGSKKAV, KSAPAPKK*GSKKAVT, PAPKKGSK*KAVTKVQ, APKKGSKK*AVTKVQK; AKSAPAPK*KGSKKAV, KSAPAPKK*GSKKAVT, PAP…	SAPAPK*K*GSK*K*AVTK	3	555.989	3488				3540	3478	3761	3834	3495				3554		3769		2.497				2.224	2.029	1.879	1.978	-0.2023				0.2653	0.5463	0.3464	-0.1434	0.179
304	293	Chromatin, DNA-binding, DNA repair or DNA replication protein	Hist1h2bc; Hist1h2be; Hist1h2bm; Hist1h2bn; Hist1h2bp; Hist1h2bp; Hist2h2bb; Hist2h2be; Hist3h2bb-ps	H2B1C; H2B1K; H2B1D; H2B; Hist1h2bp; Hist1h2bp iso3; H2B1H; H2B1L; HIST3H2BB	§13, §16, §17; §13, §16, §17; §13, §16, §17; §13, §16, §17; §13, §16, §17; §13, §16, §17; §13, §16, §17; §13, §16, §17; §13, §16, §17	histone H2B type 1-C/E/G	Q6ZWY9; NP_001171124; P10854; P10853; Q8CGP2; Q8C622; Q64525; Q64524; Q8CGP0	http://www.phosphosite.org/proteinAction.do?id=8393&showAllSites=true	14; 14; 14; 14; 14; 16; 14; 14; 14	KSAPAPKK*GSKKAVT, PAPKKGSK*KAVTKAQ, APKKGSKK*AVTKAQK; KSAPAPKK*GSKKAVT, PAPKKGSK*KAVTKAQ, APKKGSKK*AVTKAQK; KSAPAPKK*GSKKAVT, PAPKKGSK*KAVTKAQ, APKKGSKK*AVTKAQK; KSAPAPKK*GSKKAVT, PAPKKGSK*KAVTKAQ, APKKGSKK*AVTKAQK; KSVPAPKK*GSKKAVT, PAPKKGSK*KAVTKAQ, APKKGSKK*AVTKAQK; KSVPAPKK*GSKKAVT, PAPKKGSK*KAVTKVR, APKKGSKK*AVTKVRK; KSAPAPKK*GSKKAVT, PAPKKGSK*KAVTKVQ, APKKGSKK*AVTKVQK; KSAPAPKK*GSKKAVT, PAP…	K*GSK*K*AVTK	2	536.822	1871	1827	1785	1843	1890	1802	2081	2124	1862	1854	1803	1852	1908	1823	2078	2125	1.97	3.08	3.504	2.417	3.241	3.189	2.627	2.352	-0.339	-0.1945	-0.0537	-0.1264	-0.2588	0.0479	-0.2812	-0.7436	0.113	0.185	0.193	0.2
305	294	Chromatin, DNA-binding, DNA repair or DNA replication protein	Hist1h2bc; Hist1h2be; Hist1h2bm; Hist1h2bn; Hist1h2bp; Hist1h2bp; Hist2h2bb; Hist2h2be; Hist3h2bb-ps	H2B1C; H2B1K; H2B1D; H2B; Hist1h2bp; Hist1h2bp iso3; H2B1H; H2B1L; HIST3H2BB	§13, §16, §17; §13, §16, §17; §13, §16, §17; §13, §16, §17; §13, §16, §17; §13, §16, §17; §13, §16, §17; §13, §16, §17; §13, §16, §17	histone H2B type 1-C/E/G	Q6ZWY9; NP_001171124; P10854; P10853; Q8CGP2; Q8C622; Q64525; Q64524; Q8CGP0	http://www.phosphosite.org/proteinAction.do?id=8393&showAllSites=true	14; 14; 14; 14; 14; 16; 14; 14; 14	KSAPAPKK*GSKKAVT, PAPKKGSK*KAVTKAQ, APKKGSKK*AVTKAQK; KSAPAPKK*GSKKAVT, PAPKKGSK*KAVTKAQ, APKKGSKK*AVTKAQK; KSAPAPKK*GSKKAVT, PAPKKGSK*KAVTKAQ, APKKGSKK*AVTKAQK; KSAPAPKK*GSKKAVT, PAPKKGSK*KAVTKAQ, APKKGSKK*AVTKAQK; KSVPAPKK*GSKKAVT, PAPKKGSK*KAVTKAQ, APKKGSKK*AVTKAQK; KSVPAPKK*GSKKAVT, PAPKKGSK*KAVTKVR, APKKGSKK*AVTKVRK; KSAPAPKK*GSKKAVT, PAPKKGSK*KAVTKVQ, APKKGSKK*AVTKVQK; KSAPAPKK*GSKKAVT, PAP…	K*GSK*K*AVTK	2	536.822					1932								1908								3.199								-0.2588
306	295	Chromatin, DNA-binding, DNA repair or DNA replication protein	Hist1h2bc; Hist1h2be; Hist1h2bm; Hist1h2bn; Hist1h2bp; Hist2h2be; Hist3h2bb-ps	H2B1C; H2B1K; H2B1D; H2B; Hist1h2bp; H2B1L; HIST3H2BB	§13, §16, §17, §21; §13, §16, §17, §21; §13, §16, §17, §21; §13, §16, §17, §21; §13, §16, §17, §21; §13, §16, §17, §21; §13, §16, §17, §21	histone H2B type 1-C/E/G	Q6ZWY9; NP_001171124; P10854; P10853; Q8CGP2; Q64524; Q8CGP0	http://www.phosphosite.org/proteinAction.do?id=8393&showAllSites=true	14; 14; 14; 14; 14; 14; 14	KSAPAPKK*GSKKAVT, PAPKKGSK*KAVTKAQ, APKKGSKK*AVTKAQK, GSKKAVTK*AQKKDGK; KSAPAPKK*GSKKAVT, PAPKKGSK*KAVTKAQ, APKKGSKK*AVTKAQK, GSKKAVTK*AQKKDGK; KSAPAPKK*GSKKAVT, PAPKKGSK*KAVTKAQ, APKKGSKK*AVTKAQK, GSKKAVTK*AQKKDGK; KSAPAPKK*GSKKAVT, PAPKKGSK*KAVTKAQ, APKKGSKK*AVTKAQK, GSKKAVTK*AQKKDGK; KSVPAPKK*GSKKAVT, PAPKKGSK*KAVTKAQ, APKKGSKK*AVTKAQK, GSKKAVTK*AQKKDGK; KSAPAPKK*GSKKAVT, PAPKKGSK*KAVTKAQ, APK…	K*GSK*K*AVTK*AQK	2	721.422	2786	2739	2725	2830	2835		3052	3124	2818	2770	2757	2795	2866		3083	3154	4.371	4.156	4.355	4.568	4.285		4.533	4.354	0.3228	0.3582	0.5357	0.5614	0.4684		0.13	-0.2979	0.273	0.299	0.296	0.283
307	296	Chromatin, DNA-binding, DNA repair or DNA replication protein	Hist1h2bc; Hist1h2be; Hist1h2bm; Hist1h2bn; Hist1h2bp; Hist2h2be; Hist3h2bb-ps	H2B1C; H2B1K; H2B1D; H2B; Hist1h2bp; H2B1L; HIST3H2BB	§13, §16, §17, §21; §13, §16, §17, §21; §13, §16, §17, §21; §13, §16, §17, §21; §13, §16, §17, §21; §13, §16, §17, §21; §13, §16, §17, §21	histone H2B type 1-C/E/G	Q6ZWY9; NP_001171124; P10854; P10853; Q8CGP2; Q64524; Q8CGP0	http://www.phosphosite.org/proteinAction.do?id=8393&showAllSites=true	14; 14; 14; 14; 14; 14; 14	KSAPAPKK*GSKKAVT, PAPKKGSK*KAVTKAQ, APKKGSKK*AVTKAQK, GSKKAVTK*AQKKDGK; KSAPAPKK*GSKKAVT, PAPKKGSK*KAVTKAQ, APKKGSKK*AVTKAQK, GSKKAVTK*AQKKDGK; KSAPAPKK*GSKKAVT, PAPKKGSK*KAVTKAQ, APKKGSKK*AVTKAQK, GSKKAVTK*AQKKDGK; KSAPAPKK*GSKKAVT, PAPKKGSK*KAVTKAQ, APKKGSKK*AVTKAQK, GSKKAVTK*AQKKDGK; KSVPAPKK*GSKKAVT, PAPKKGSK*KAVTKAQ, APKKGSKK*AVTKAQK, GSKKAVTK*AQKKDGK; KSAPAPKK*GSKKAVT, PAPKKGSK*KAVTKAQ, APK…	K*GSK*K*AVTK*AQK	2	721.422				2750								2795								4.16								0.5614								0.232
308	297	Chromatin, DNA-binding, DNA repair or DNA replication protein	Hist1h2bc; Hist1h2be; Hist1h2bm; Hist1h2bn; Hist1h2bp; Hist2h2be; Hist3h2bb-ps	H2B1C; H2B1K; H2B1D; H2B; Hist1h2bp; H2B1L; HIST3H2BB	§13, §16, §17, §21; §13, §16, §17, §21; §13, §16, §17, §21; §13, §16, §17, §21; §13, §16, §17, §21; §13, §16, §17, §21; §13, §16, §17, §21	histone H2B type 1-C/E/G	Q6ZWY9; NP_001171124; P10854; P10853; Q8CGP2; Q64524; Q8CGP0	http://www.phosphosite.org/proteinAction.do?id=8393&showAllSites=true	14; 14; 14; 14; 14; 14; 14	KSAPAPKK*GSKKAVT, PAPKKGSK*KAVTKAQ, APKKGSKK*AVTKAQK, GSKKAVTK*AQKKDGK; KSAPAPKK*GSKKAVT, PAPKKGSK*KAVTKAQ, APKKGSKK*AVTKAQK, GSKKAVTK*AQKKDGK; KSAPAPKK*GSKKAVT, PAPKKGSK*KAVTKAQ, APKKGSKK*AVTKAQK, GSKKAVTK*AQKKDGK; KSAPAPKK*GSKKAVT, PAPKKGSK*KAVTKAQ, APKKGSKK*AVTKAQK, GSKKAVTK*AQKKDGK; KSVPAPKK*GSKKAVT, PAPKKGSK*KAVTKAQ, APKKGSKK*AVTKAQK, GSKKAVTK*AQKKDGK; KSAPAPKK*GSKKAVT, PAPKKGSK*KAVTKAQ, APK…	K*GSK*K*AVTK*AQK	3	481.284	2819	2749	2747	2774	2889	2775		3123	2818	2770	2757	2795	2866	2807		3154	3.734	3.948	4.03	3.913	3.705	4.006		3.933	0.1279	0.2347	0.3595	0.4428	0.5426	0.4594		-0.2931	0.129	0.177	0.218	0.183
309	298	Chromatin, DNA-binding, DNA repair or DNA replication protein	Hist1h2bc; Hist1h2be; Hist1h2bm; Hist1h2bn; Hist1h2bp; Hist2h2be; Hist3h2bb-ps	H2B1C; H2B1K; H2B1D; H2B; Hist1h2bp; H2B1L; HIST3H2BB	§13, §16, §21; §13, §16, §21; §13, §16, §21; §13, §16, §21; §13, §16, §21; §13, §16, §21; §13, §16, §21	histone H2B type 1-C/E/G	Q6ZWY9; NP_001171124; P10854; P10853; Q8CGP2; Q64524; Q8CGP0	http://www.phosphosite.org/proteinAction.do?id=8393&showAllSites=true	14; 14; 14; 14; 14; 14; 14	KSAPAPKK*GSKKAVT, PAPKKGSK*KAVTKAQ, GSKKAVTK*AQKKDGK; KSAPAPKK*GSKKAVT, PAPKKGSK*KAVTKAQ, GSKKAVTK*AQKKDGK; KSAPAPKK*GSKKAVT, PAPKKGSK*KAVTKAQ, GSKKAVTK*AQKKDGK; KSAPAPKK*GSKKAVT, PAPKKGSK*KAVTKAQ, GSKKAVTK*AQKKDGK; KSVPAPKK*GSKKAVT, PAPKKGSK*KAVTKAQ, GSKKAVTK*AQKKDGK; KSAPAPKK*GSKKAVT, PAPKKGSK*KAVTKAQ, GSKKAVTK*AQKKDGK; KSAPAPKK*GSKKAVT, PAPKKGSK*KAVTKAQ, GSKKAVTK*AQKKDGK	K*GSK*KAVTK*AQK	3	467.28	1747	1761						2028	1763	1722						2018	3.438	2.67						3.467	-0.0678	0.0972						-0.5243	0.22	0.217
310	299	Chromatin, DNA-binding, DNA repair or DNA replication protein	Hist1h2bc; Hist1h2be; Hist1h2bm; Hist1h2bn; Hist1h2bp; Hist2h2be; Hist3h2bb-ps	H2B1C; H2B1K; H2B1D; H2B; Hist1h2bp; H2B1L; HIST3H2BB	§16, §17, §21; §16, §17, §21; §16, §17, §21; §16, §17, §21; §16, §17, §21; §16, §17, §21; §16, §17, §21	histone H2B type 1-C/E/G	Q6ZWY9; NP_001171124; P10854; P10853; Q8CGP2; Q64524; Q8CGP0	http://www.phosphosite.org/proteinAction.do?id=8393&showAllSites=true	14; 14; 14; 14; 14; 14; 14	PAPKKGSK*KAVTKAQ, APKKGSKK*AVTKAQK, GSKKAVTK*AQKKDGK; PAPKKGSK*KAVTKAQ, APKKGSKK*AVTKAQK, GSKKAVTK*AQKKDGK; PAPKKGSK*KAVTKAQ, APKKGSKK*AVTKAQK, GSKKAVTK*AQKKDGK; PAPKKGSK*KAVTKAQ, APKKGSKK*AVTKAQK, GSKKAVTK*AQKKDGK; PAPKKGSK*KAVTKAQ, APKKGSKK*AVTKAQK, GSKKAVTK*AQKKDGK; PAPKKGSK*KAVTKAQ, APKKGSKK*AVTKAQK, GSKKAVTK*AQKKDGK; PAPKKGSK*KAVTKAQ, APKKGSKK*AVTKAQK, GSKKAVTK*AQKKDGK	KGSK*K*AVTK*AQK	2	700.417	1756	1717	1710	1738		1706	1961	1998	1763	1733	1715	1753		1713	1968	2010	3.541	3.516	4.016	3.248		3.855	3.689	3.439	0.7173	0.818	0.7602	0.773		0.7595	0.4401	0.3558	0.223	0.179	0.295	0.23
311	300	Chromatin, DNA-binding, DNA repair or DNA replication protein	Hist1h2bc; Hist1h2be; Hist1h2bm; Hist1h2bn; Hist1h2bp; Hist2h2be; Hist3h2bb-ps	H2B1C; H2B1K; H2B1D; H2B; Hist1h2bp; H2B1L; HIST3H2BB	§16, §17, §21; §16, §17, §21; §16, §17, §21; §16, §17, §21; §16, §17, §21; §16, §17, §21; §16, §17, §21	histone H2B type 1-C/E/G	Q6ZWY9; NP_001171124; P10854; P10853; Q8CGP2; Q64524; Q8CGP0	http://www.phosphosite.org/proteinAction.do?id=8393&showAllSites=true	14; 14; 14; 14; 14; 14; 14	PAPKKGSK*KAVTKAQ, APKKGSKK*AVTKAQK, GSKKAVTK*AQKKDGK; PAPKKGSK*KAVTKAQ, APKKGSKK*AVTKAQK, GSKKAVTK*AQKKDGK; PAPKKGSK*KAVTKAQ, APKKGSKK*AVTKAQK, GSKKAVTK*AQKKDGK; PAPKKGSK*KAVTKAQ, APKKGSKK*AVTKAQK, GSKKAVTK*AQKKDGK; PAPKKGSK*KAVTKAQ, APKKGSKK*AVTKAQK, GSKKAVTK*AQKKDGK; PAPKKGSK*KAVTKAQ, APKKGSKK*AVTKAQK, GSKKAVTK*AQKKDGK; PAPKKGSK*KAVTKAQ, APKKGSKK*AVTKAQK, GSKKAVTK*AQKKDGK	KGSK*K*AVTK*AQK	3	467.28			1706					2015			1715					2018			3.669					3.121			0.3201					-0.5243			0.181
312	301	Chromatin, DNA-binding, DNA repair or DNA replication protein	Hist1h2bc; Hist1h2be; Hist1h2bm; Hist1h2bn; Hist1h2bp; Hist2h2be; Hist3h2bb-ps	H2B1C; H2B1K; H2B1D; H2B; Hist1h2bp; H2B1L; HIST3H2BB	§17, §21; §17, §21; §17, §21; §17, §21; §17, §21; §17, §21; §17, §21	histone H2B type 1-C/E/G	Q6ZWY9; NP_001171124; P10854; P10853; Q8CGP2; Q64524; Q8CGP0	http://www.phosphosite.org/proteinAction.do?id=8393&showAllSites=true	14; 14; 14; 14; 14; 14; 14	APKKGSKK*AVTKAQK, GSKKAVTK*AQKKDGK; APKKGSKK*AVTKAQK, GSKKAVTK*AQKKDGK; APKKGSKK*AVTKAQK, GSKKAVTK*AQKKDGK; APKKGSKK*AVTKAQK, GSKKAVTK*AQKKDGK; APKKGSKK*AVTKAQK, GSKKAVTK*AQKKDGK; APKKGSKK*AVTKAQK, GSKKAVTK*AQKKDGK; APKKGSKK*AVTKAQK, GSKKAVTK*AQKKDGK	K*AVTK*AQK	2	479.29								1837								1840								2.88								-0.3937
313	302	Chromatin, DNA-binding, DNA repair or DNA replication protein	Hist1h2bc; Hist1h2be; Hist1h2bm; Hist1h2bn; Hist1h2bp; Hist2h2be; Hist3h2bb-ps	H2B1C; H2B1K; H2B1D; H2B; Hist1h2bp; H2B1L; HIST3H2BB	§17, §21; §17, §21; §17, §21; §17, §21; §17, §21; §17, §21; §17, §21	histone H2B type 1-C/E/G	Q6ZWY9; NP_001171124; P10854; P10853; Q8CGP2; Q64524; Q8CGP0	http://www.phosphosite.org/proteinAction.do?id=8393&showAllSites=true	14; 14; 14; 14; 14; 14; 14	APKKGSKK*AVTKAQK, GSKKAVTK*AQKKDGK; APKKGSKK*AVTKAQK, GSKKAVTK*AQKKDGK; APKKGSKK*AVTKAQK, GSKKAVTK*AQKKDGK; APKKGSKK*AVTKAQK, GSKKAVTK*AQKKDGK; APKKGSKK*AVTKAQK, GSKKAVTK*AQKKDGK; APKKGSKK*AVTKAQK, GSKKAVTK*AQKKDGK; APKKGSKK*AVTKAQK, GSKKAVTK*AQKKDGK	K*AVTK*AQKK	2	543.337		1399								1392								2.936								-0.3611								0.153
314	303	Chromatin, DNA-binding, DNA repair or DNA replication protein	Hist1h2bc; Hist1h2be; Hist1h2bm; Hist1h2bn; Hist1h2bp; Hist2h2be; Hist3h2bb-ps	H2B1C; H2B1K; H2B1D; H2B; Hist1h2bp; H2B1L; HIST3H2BB	§17, §21, §24; §17, §21, §24; §17, §21, §24; §17, §21, §24; §17, §21, §24; §17, §21, §24; §17, §21, §24	histone H2B type 1-C/E/G	Q6ZWY9; NP_001171124; P10854; P10853; Q8CGP2; Q64524; Q8CGP0	http://www.phosphosite.org/proteinAction.do?id=8393&showAllSites=true	14; 14; 14; 14; 14; 14; 14	APKKGSKK*AVTKAQK, GSKKAVTK*AQKKDGK, KAVTKAQK*KDGKKRK; APKKGSKK*AVTKAQK, GSKKAVTK*AQKKDGK, KAVTKAQK*KDGKKRK; APKKGSKK*AVTKAQK, GSKKAVTK*AQKKDGK, KAVTKAQK*KDGKKRK; APKKGSKK*AVTKAQK, GSKKAVTK*AQKKDGK, KAVTKAQK*KDGKKRK; APKKGSKK*AVTKAQK, GSKKAVTK*AQKKDGK, KAVTKAQK*KDGKKRK; APKKGSKK*AVTKAQK, GSKKAVTK*AQKKDGK, KAVTKAQK*KDGKKRK; APKKGSKK*AVTKAQK, GSKKAVTK*AQKKDGK, KAVTKAQK*KDGKKRK	K*AVTK*AQK*K	2	564.343	2060	2022	2005	2048	2106	2028		2351	2079	2059	2022	2069	2116	2038		2358	3.201	3.027	3.208	3.144	3.24	3.247		3.227	-0.1532	-0.1842	-0.0423	-0.2241	-0.0885	-0.3545		-0.5221	0.189	0.196	0.187	0.183
315	304	Chromatin, DNA-binding, DNA repair or DNA replication protein	Hist1h2bc; Hist1h2be; Hist1h2bh; Hist1h2bn	H2B1C; H2B1K; H2B2E; H2B	§6; §6; §6; §6	histone H2B type 1-C/E/G	Q6ZWY9; NP_001171124; Q64478; P10853	http://www.phosphosite.org/proteinAction.do?id=8393&showAllSites=true	14; 14; 14; 14	--MPEPAK*SAPAPKK; --MPEPAK*SAPAPKK; --MPEPAK*SAPAPKK; --MPEPAK*SAPAPKK	PEPAK*SAPAPK	2	567.811			1971																2.137								0.1471								0.076
316	305	Chromatin, DNA-binding, DNA repair or DNA replication protein	Hist1h2bc; Hist1h2be; Hist1h2bh; Hist1h2bn	H2B1C; H2B1K; H2B2E; H2B	§6, §12, §13; §6, §12, §13; §6, §12, §13; §6, §12, §13	histone H2B type 1-C/E/G	Q6ZWY9; NP_001171124; Q64478; P10853	http://www.phosphosite.org/proteinAction.do?id=8393&showAllSites=true	14; 14; 14; 14	--MPEPAK*SAPAPKK, AKSAPAPK*KGSKKAV, KSAPAPKK*GSKKAVT; --MPEPAK*SAPAPKK, AKSAPAPK*KGSKKAV, KSAPAPKK*GSKKAVT; --MPEPAK*SAPAPKK, AKSAPAPK*KGSKKAL, KSAPAPKK*GSKKALT; --MPEPAK*SAPAPKK, AKSAPAPK*KGSKKAV, KSAPAPKK*GSKKAVT	PEPAK*SAPAPK*K*GSK	2	809.944		2914																2.05								0.2399								0.378
317	306	Chromatin, DNA-binding, DNA repair or DNA replication protein	Hist1h2bc; Hist1h2be; Hist1h2bh; Hist1h2bn	H2B1C; H2B1K; H2B2E; H2B	§6, §12, §13, §16; §6, §12, §13, §16; §6, §12, §13, §16; §6, §12, §13, §16	histone H2B type 1-C/E/G	Q6ZWY9; NP_001171124; Q64478; P10853	http://www.phosphosite.org/proteinAction.do?id=8393&showAllSites=true	14; 14; 14; 14	--MPEPAK*SAPAPKK, AKSAPAPK*KGSKKAV, KSAPAPKK*GSKKAVT, PAPKKGSK*KAVTKAQ; --MPEPAK*SAPAPKK, AKSAPAPK*KGSKKAV, KSAPAPKK*GSKKAVT, PAPKKGSK*KAVTKAQ; --MPEPAK*SAPAPKK, AKSAPAPK*KGSKKAL, KSAPAPKK*GSKKALT, PAPKKGSK*KALTKAQ; --MPEPAK*SAPAPKK, AKSAPAPK*KGSKKAV, KSAPAPKK*GSKKAVT, PAPKKGSK*KAVTKAQ	PEPAK*SAPAPK*K*GSK*K	2	894.996							3637								3627								2.793								0.2161
318	307	Chromatin, DNA-binding, DNA repair or DNA replication protein	Hist1h2bc; Hist1h2be; Hist1h2bh; Hist1h2bn	H2B1C; H2B1K; H2B2E; H2B	§6, §12, §13, §16; §6, §12, §13, §16; §6, §12, §13, §16; §6, §12, §13, §16	histone H2B type 1-C/E/G	Q6ZWY9; NP_001171124; Q64478; P10853	http://www.phosphosite.org/proteinAction.do?id=8393&showAllSites=true	14; 14; 14; 14	--MPEPAK*SAPAPKK, AKSAPAPK*KGSKKAV, KSAPAPKK*GSKKAVT, PAPKKGSK*KAVTKAQ; --MPEPAK*SAPAPKK, AKSAPAPK*KGSKKAV, KSAPAPKK*GSKKAVT, PAPKKGSK*KAVTKAQ; --MPEPAK*SAPAPKK, AKSAPAPK*KGSKKAL, KSAPAPKK*GSKKALT, PAPKKGSK*KALTKAQ; --MPEPAK*SAPAPKK, AKSAPAPK*KGSKKAV, KSAPAPKK*GSKKAVT, PAPKKGSK*KAVTKAQ	PEPAK*SAPAPK*K*GSK*K	3	597	3352	3311	3293	3310	3388	3314		3678	3338	3297	3289	3317	3394				4.302	3.35	3.625	3.485	3.866	3.406		2.72	0.1351	0.1966	0.0736	0.4453	0.4017	0.1194		0.0831	0.399	0.361	0.419	0.386
319	308	Chromatin, DNA-binding, DNA repair or DNA replication protein	Hist1h2bc; Hist1h2be; Hist1h2bh; Hist1h2bn	H2B1C; H2B1K; H2B2E; H2B	§6, §12, §13, §17; §6, §12, §13, §17; §6, §12, §13, §17; §6, §12, §13, §17	histone H2B type 1-C/E/G	Q6ZWY9; NP_001171124; Q64478; P10853	http://www.phosphosite.org/proteinAction.do?id=8393&showAllSites=true	14; 14; 14; 14	--MPEPAK*SAPAPKK, AKSAPAPK*KGSKKAV, KSAPAPKK*GSKKAVT, APKKGSKK*AVTKAQK; --MPEPAK*SAPAPKK, AKSAPAPK*KGSKKAV, KSAPAPKK*GSKKAVT, APKKGSKK*AVTKAQK; --MPEPAK*SAPAPKK, AKSAPAPK*KGSKKAL, KSAPAPKK*GSKKALT, APKKGSKK*ALTKAQK; --MPEPAK*SAPAPKK, AKSAPAPK*KGSKKAV, KSAPAPKK*GSKKAVT, APKKGSKK*AVTKAQK	PEPAK*SAPAPK*K*GSKK*	3	597							3652																3.374								-0.0142
320	309	Chromatin, DNA-binding, DNA repair or DNA replication protein	Hist1h2bc; Hist1h2be; Hist1h2bh; Hist1h2bn	H2B1C; H2B1K; H2B2E; H2B	§6, §13, §16; §6, §13, §16; §6, §13, §16; §6, §13, §16	histone H2B type 1-C/E/G	Q6ZWY9; NP_001171124; Q64478; P10853	http://www.phosphosite.org/proteinAction.do?id=8393&showAllSites=true	14; 14; 14; 14	--MPEPAK*SAPAPKK, KSAPAPKK*GSKKAVT, PAPKKGSK*KAVTKAQ; --MPEPAK*SAPAPKK, KSAPAPKK*GSKKAVT, PAPKKGSK*KAVTKAQ; --MPEPAK*SAPAPKK, KSAPAPKK*GSKKALT, PAPKKGSK*KALTKAQ; --MPEPAK*SAPAPKK, KSAPAPKK*GSKKAVT, PAPKKGSK*KAVTKAQ	PEPAK*SAPAPKK*GSK*	3	540.298		2851			2951													2.275			2.315					-0.0789			0.2547					0.149
321	310	Chromatin, DNA-binding, DNA repair or DNA replication protein	Hist1h2bh	H2B2E	§12, §13, §16, §17	histone H2B type 1-H	Q64478	http://www.phosphosite.org/proteinAction.do?id=22837&showAllSites=true	14	AKSAPAPK*KGSKKAL, KSAPAPKK*GSKKALT, PAPKKGSK*KALTKAQ, APKKGSKK*ALTKAQK	SAPAPK*K*GSK*K*ALTK	2	840.488				4487								4479								2.782								0.9881								0.262
322	311	Chromatin, DNA-binding, DNA repair or DNA replication protein	Hist1h2bm	H2B1D	§6	histone H2B type 1-M	P10854	http://www.phosphosite.org/proteinAction.do?id=8425&showAllSites=true	14	--MPEPTK*SAPAPKK	PEPTK*SAPAPK	2	582.817							2288	2311															2.451	1.85							-0.4541	-0.2746
323	312	Chromatin, DNA-binding, DNA repair or DNA replication protein	Hist1h4b; Hist1h4n	H4; H4H4	§13, §17; §13, §17	histone H4	P62806; NP_783588	http://www.phosphosite.org/proteinAction.do?id=1878&showAllSites=true	11; 11	KGGKGLGK*GGAKRHR, GLGKGGAK*RHRKVLR; KGGKGLGK*GGAKRHR, GLGKGGAK*RHRKVLR	GK*GGAK*R	2	379.219	3376	3324															1.798	1.707							-0.072	0.0732							0.011	0.019
324	313	Chromatin, DNA-binding, DNA repair or DNA replication protein	Hist1h4b; Hist1h4n	H4; H4H4	§13, §17; §13, §17	histone H4	P62806; NP_783588	http://www.phosphosite.org/proteinAction.do?id=1878&showAllSites=true	11; 11	KGGKGLGK*GGAKRHR, GLGKGGAK*RHRKVLR; KGGKGLGK*GGAKRHR, GLGKGGAK*RHRKVLR	GLGK*GGAK*R	2	464.272	2080	2035	2023	2056	2117	2039	2308	2370	2099	2068	2053	2088	2140	2057	2331	2400	2.58	2.383	2.684	2.475	2.422	2.118	2.299	2.788	1.9404	1.8304	2.2013	1.9522	1.3668	1.2461	1.1296	0.8752	0.013	0.046	0.022	0.025
325	314	Chromatin, DNA-binding, DNA repair or DNA replication protein	Hist1h4b; Hist1h4n	H4; H4H4	§13, §17; §13, §17	histone H4	P62806; NP_783588	http://www.phosphosite.org/proteinAction.do?id=1878&showAllSites=true	11; 11	KGGKGLGK*GGAKRHR, GLGKGGAK*RHRKVLR; KGGKGLGK*GGAKRHR, GLGKGGAK*RHRKVLR	LGK*GGAK*R	2	435.761		1769	1751	1800														1.867	1.99	2.092						0.3532	0.4474	0.4233						0.029	0.145	0.08
326	315	Chromatin, DNA-binding, DNA repair or DNA replication protein	Hist1h4b; Hist1h4n	H4; H4H4	§32; §32	histone H4	P62806; NP_783588	http://www.phosphosite.org/proteinAction.do?id=1878&showAllSites=true	11; 11	DNIQGITK*PAIRRLA; DNIQGITK*PAIRRLA	DNIQGITK*PAIR	2	684.386				6870								6184								2.522								0.5647								0.218
327	316	Chromatin, DNA-binding, DNA repair or DNA replication protein	Hist1h4b; Hist1h4n	H4; H4H4	§6, §13, §17; §6, §13, §17	histone H4	P62806; NP_783588	http://www.phosphosite.org/proteinAction.do?id=1878&showAllSites=true	11; 11	--MSGRGK*GGKGLGK, KGGKGLGK*GGAKRHR, GLGKGGAK*RHRKVLR; --MSGRGK*GGKGLGK, KGGKGLGK*GGAKRHR, GLGKGGAK*RHRKVLR	GK*GGKGLGK*GGAK*R	2	698.905	2081				2131				2046				2072				4.048				3.732				0.1639				0.1732				0.378
328	317	Chromatin, DNA-binding, DNA repair or DNA replication protein	Hist1h4b; Hist1h4n	H4; H4H4	§6, §13, §17; §6, §13, §17	histone H4	P62806; NP_783588	http://www.phosphosite.org/proteinAction.do?id=1878&showAllSites=true	11; 11	--MSGRGK*GGKGLGK, KGGKGLGK*GGAKRHR, GLGKGGAK*RHRKVLR; --MSGRGK*GGKGLGK, KGGKGLGK*GGAKRHR, GLGKGGAK*RHRKVLR	GK*GGKGLGK*GGAK*R	3	466.272		1975	1937	1993	2051			2350		2007			2072			2336		4.384	3.223	3.549	3.962			3.728		1.096	1.7231	1.6966	1.2299			0.2541		0.159	0	0.07
329	318	Chromatin, DNA-binding, DNA repair or DNA replication protein	Hist1h4b; Hist1h4n	H4; H4H4	§6, §9; §6, §9	histone H4	P62806; NP_783588	http://www.phosphosite.org/proteinAction.do?id=1878&showAllSites=true	11; 11	--MSGRGK*GGKGLGK, SGRGKGGK*GLGKGGA; --MSGRGK*GGKGLGK, SGRGKGGK*GLGKGGA	GK*GGK*GLGK	2	443.261	1919	1899	1859	1897		1877	2172	2213	1938	1919	1888	1918			2177	2223	2.884	2.915	2.764	2.544		1.825	2.343	2.975	-0.1933	-0.2068	-0.0149	0.0326		0.1037	-0.2249	-0.593	0.055	0.037	0.007	0.06
330	319	Chromatin, DNA-binding, DNA repair or DNA replication protein	Hist1h4b; Hist1h4n	H4; H4H4	§6, §9, §13; §6, §9, §13	histone H4	P62806; NP_783588	http://www.phosphosite.org/proteinAction.do?id=1878&showAllSites=true	11; 11	--MSGRGK*GGKGLGK, SGRGKGGK*GLGKGGA, KGGKGLGK*GGAKRHR; --MSGRGK*GGKGLGK, SGRGKGGK*GLGKGGA, KGGKGLGK*GGAKRHR	GK*GGK*GLGK*GGAK	2	620.854	2690	2645	2622	2662	2741	2661	2970	3038	2730	2693	2669	2696	2778	2697	3006	3077	3.723	3.666	3.737	3.349	3.231	3.571	3.306	3.585	0.0692	0.0999	0.1563	0.1934	0.1426	0.2836	-0.0992	-0.4426	0.344	0.404	0.39	0.378
331	320	Chromatin, DNA-binding, DNA repair or DNA replication protein	Hist1h4b; Hist1h4n	H4; H4H4	§6, §9, §13; §6, §9, §13	histone H4	P62806; NP_783588	http://www.phosphosite.org/proteinAction.do?id=1878&showAllSites=true	11; 11	--MSGRGK*GGKGLGK, SGRGKGGK*GLGKGGA, KGGKGLGK*GGAKRHR; --MSGRGK*GGKGLGK, SGRGKGGK*GLGKGGA, KGGKGLGK*GGAKRHR	GK*GGK*GLGK*GGAK	2	620.854	2776	2729	2704			2744			2730	2693	2669			2697			3.012	3.107	3.239			3.447			0.0692	0.0999	0.1523			0.2836			0.35	0.35	0.297
332	321	Chromatin, DNA-binding, DNA repair or DNA replication protein	Hist1h4b; Hist1h4n	H4; H4H4	§6, §9, §13; §6, §9, §13	histone H4	P62806; NP_783588	http://www.phosphosite.org/proteinAction.do?id=1878&showAllSites=true	11; 11	--MSGRGK*GGKGLGK, SGRGKGGK*GLGKGGA, KGGKGLGK*GGAKRHR; --MSGRGK*GGKGLGK, SGRGKGGK*GLGKGGA, KGGKGLGK*GGAKRHR	GK*GGK*GLGK*GGAK	3	414.238	2712						2987	3067							3006	3077	3.058						2.894	3.114	0.3594						0.3167	-0.1435	0.065
333	322	Chromatin, DNA-binding, DNA repair or DNA replication protein	Hist1h4b; Hist1h4n	H4; H4H4	§6, §9, §13; §6, §9, §13	histone H4	P62806; NP_783588	http://www.phosphosite.org/proteinAction.do?id=1878&showAllSites=true	11; 11	--MSGRGK*GGKGLGK, SGRGKGGK*GLGKGGA, KGGKGLGK*GGAKRHR; --MSGRGK*GGKGLGK, SGRGKGGK*GLGKGGA, KGGKGLGK*GGAKRHR	GK*GGK*GLGK*GGAK	3	414.238	2705																2.813								0.3763								0.113
334	323	Chromatin, DNA-binding, DNA repair or DNA replication protein	Hist1h4b; Hist1h4n	H4; H4H4	§6, §9, §13, §17; §6, §9, §13, §17	histone H4	P62806; NP_783588	http://www.phosphosite.org/proteinAction.do?id=1878&showAllSites=true	11; 11	--MSGRGK*GGKGLGK, SGRGKGGK*GLGKGGA, KGGKGLGK*GGAKRHR, GLGKGGAK*RHRKVLR; --MSGRGK*GGKGLGK, SGRGKGGK*GLGKGGA, KGGKGLGK*GGAKRHR, GLGKGGAK*RHRKVLR	GK*GGK*GLGK*GGAK*	2	641.859			4691																2.827								0.3876								0.066
335	324	Chromatin, DNA-binding, DNA repair or DNA replication protein	Hist1h4b; Hist1h4n	H4; H4H4	§6, §9, §13, §17; §6, §9, §13, §17	histone H4	P62806; NP_783588	http://www.phosphosite.org/proteinAction.do?id=1878&showAllSites=true	11; 11	--MSGRGK*GGKGLGK, SGRGKGGK*GLGKGGA, KGGKGLGK*GGAKRHR, GLGKGGAK*RHRKVLR; --MSGRGK*GGKGLGK, SGRGKGGK*GLGKGGA, KGGKGLGK*GGAKRHR, GLGKGGAK*RHRKVLR	GK*GGK*GLGK*GGAK*R	2	719.91	3340	3287	3280	3297	3385	3408	3726	3796	3380	3330	3311	3339	3435	3360	3671	3729	4.731	5.06	4.998	4.813	4.945	4.824	4.729	4.922	1.3116	1.2011	1.0329	1.0225	0.7862	0.6451	0.7327	0.5853	0.438	0.443	0.457	0.45
336	325	Chromatin, DNA-binding, DNA repair or DNA replication protein	Hist1h4b; Hist1h4n	H4; H4H4	§6, §9, §13, §17; §6, §9, §13, §17	histone H4	P62806; NP_783588	http://www.phosphosite.org/proteinAction.do?id=1878&showAllSites=true	11; 11	--MSGRGK*GGKGLGK, SGRGKGGK*GLGKGGA, KGGKGLGK*GGAKRHR, GLGKGGAK*RHRKVLR; --MSGRGK*GGKGLGK, SGRGKGGK*GLGKGGA, KGGKGLGK*GGAKRHR, GLGKGGAK*RHRKVLR	GK*GGK*GLGK*GGAK*R	2	719.91	3431	3377	3373	3392	3479	3319	3629	3697	3380	3330	3311	3339	3435	3360	3671	3729	4.593	4.785	4.737	4.718	4.724	4.657	4.641	4.785	1.3109	1.2004	1.0322	1.0218	0.7862	0.6451	0.7327	0.586	0.476	0.441	0.474	0.46
337	326	Chromatin, DNA-binding, DNA repair or DNA replication protein	Hist1h4b; Hist1h4n	H4; H4H4	§6, §9, §13, §17; §6, §9, §13, §17	histone H4	P62806; NP_783588	http://www.phosphosite.org/proteinAction.do?id=1878&showAllSites=true	11; 11	--MSGRGK*GGKGLGK, SGRGKGGK*GLGKGGA, KGGKGLGK*GGAKRHR, GLGKGGAK*RHRKVLR; --MSGRGK*GGKGLGK, SGRGKGGK*GLGKGGA, KGGKGLGK*GGAKRHR, GLGKGGAK*RHRKVLR	GK*GGK*GLGK*GGAK*R	2	719.91	3521	3482	3511	3520					3380	3330	3311	3339					4.49	3.92	3.237	3.163					0.6055	0.5735	0.6013	0.6104					0.39	0.428	0.44	0.375
338	327	Chromatin, DNA-binding, DNA repair or DNA replication protein	Hist1h4b; Hist1h4n	H4; H4H4	§6, §9, §13, §17; §6, §9, §13, §17	histone H4	P62806; NP_783588	http://www.phosphosite.org/proteinAction.do?id=1878&showAllSites=true	11; 11	--MSGRGK*GGKGLGK, SGRGKGGK*GLGKGGA, KGGKGLGK*GGAKRHR, GLGKGGAK*RHRKVLR; --MSGRGK*GGKGLGK, SGRGKGGK*GLGKGGA, KGGKGLGK*GGAKRHR, GLGKGGAK*RHRKVLR	GK*GGK*GLGK*GGAK*R	2	719.91	3645								3380								4.438								0.3713								0.45
339	328	Chromatin, DNA-binding, DNA repair or DNA replication protein	Hist1h4b; Hist1h4n	H4; H4H4	§6, §9, §13, §17; §6, §9, §13, §17	histone H4	P62806; NP_783588	http://www.phosphosite.org/proteinAction.do?id=1878&showAllSites=true	11; 11	--MSGRGK*GGKGLGK, SGRGKGGK*GLGKGGA, KGGKGLGK*GGAKRHR, GLGKGGAK*RHRKVLR; --MSGRGK*GGKGLGK, SGRGKGGK*GLGKGGA, KGGKGLGK*GGAKRHR, GLGKGGAK*RHRKVLR	GK*GGK*GLGK*GGAK*R	3	480.276	3430	3345	3372	3296	3384	3318	3693	3774	3380	3330	3311	3339	3435	3360	3671	3729	5.189	5.073	4.811	4.897	4.83	4.592	5.048	4.527	2.4556	2.2381	2.6419	2.8143	2.1436	2.0734	1.6751	1.6515	0.318	0.259	0.341	0.273
340	329	Chromatin, DNA-binding, DNA repair or DNA replication protein	Hist1h4b; Hist1h4n	H4; H4H4	§6, §9, §13, §17; §6, §9, §13, §17	histone H4	P62806; NP_783588	http://www.phosphosite.org/proteinAction.do?id=1878&showAllSites=true	11; 11	--MSGRGK*GGKGLGK, SGRGKGGK*GLGKGGA, KGGKGLGK*GGAKRHR, GLGKGGAK*RHRKVLR; --MSGRGK*GGKGLGK, SGRGKGGK*GLGKGGA, KGGKGLGK*GGAKRHR, GLGKGGAK*RHRKVLR	GK*GGK*GLGK*GGAK*R	3	480.276	3339	3366	3279	3391	3478	3407	3682	3752	3380	3330	3311	3339	3435	3360	3671	3729	4.915	5.002	4.805	4.853	4.744	4.542	4.219	4.034	2.4591	2.2381	2.6461	2.8122	2.1512	2.0692	1.6751	1.6515	0.308	0.372	0.294	0.364
341	330	Chromatin, DNA-binding, DNA repair or DNA replication protein	Hist1h4b; Hist1h4n	H4; H4H4	§6, §9, §13, §17; §6, §9, §13, §17	histone H4	P62806; NP_783588	http://www.phosphosite.org/proteinAction.do?id=1878&showAllSites=true	11; 11	--MSGRGK*GGKGLGK, SGRGKGGK*GLGKGGA, KGGKGLGK*GGAKRHR, GLGKGGAK*RHRKVLR; --MSGRGK*GGKGLGK, SGRGKGGK*GLGKGGA, KGGKGLGK*GGAKRHR, GLGKGGAK*RHRKVLR	GK*GGK*GLGK*GGAK*R	3	480.276		3528	3509	3518	3641	3568		3978			3311							2.873	3.632	2.246	3.254	1.851		2.201		0.2761	0.4818	0.7278	0.782	0.4832		0.0238		0.104	0.254	0.013
342	331	Chromatin, DNA-binding, DNA repair or DNA replication protein	Hist1h4b; Hist1h4n	H4; H4H4	§6, §9, §13, §17; §6, §9, §13, §17	histone H4	P62806; NP_783588	http://www.phosphosite.org/proteinAction.do?id=1878&showAllSites=true	11; 11	--MSGRGK*GGKGLGK, SGRGKGGK*GLGKGGA, KGGKGLGK*GGAKRHR, GLGKGGAK*RHRKVLR; --MSGRGK*GGKGLGK, SGRGKGGK*GLGKGGA, KGGKGLGK*GGAKRHR, GLGKGGAK*RHRKVLR	GK*GGK*GLGK*GGAK*R	3	480.276			2292								2285								2.858								1.5278								0.205
343	332	Chromatin, DNA-binding, DNA repair or DNA replication protein	Hist1h4b; Hist1h4n	H4; H4H4	§6, §9, §13, §17; §6, §9, §13, §17	histone H4	P62806; NP_783588	http://www.phosphosite.org/proteinAction.do?id=1878&showAllSites=true	11; 11	--MSGRGK*GGKGLGK, SGRGKGGK*GLGKGGA, KGGKGLGK*GGAKRHR, GLGKGGAK*RHRKVLR; --MSGRGK*GGKGLGK, SGRGKGGK*GLGKGGA, KGGKGLGK*GGAKRHR, GLGKGGAK*RHRKVLR	GK*GGK*GLGK*GGAK*R	3	480.276			3600																2.777								0.1607								0.105
344	333	Chromatin, DNA-binding, DNA repair or DNA replication protein	Hist1h4b; Hist1h4n	H4; H4H4	§78; §78	histone H4	P62806; NP_783588	http://www.phosphosite.org/proteinAction.do?id=1878&showAllSites=true	11; 11	VTYTEHAK*RKTVTAM; VTYTEHAK*RKTVTAM	DAVTYTEHAK*	2	588.78	3729	3632	3631	3647	3758		4017	4100	3726	3640	3646	3665	3763		4021	4113	2.062	2.402	2.282	2.641	2.393		2.259	2.304	-0.0415	0.3367	-0.3279	-0.186	-0.2778		-0.1511	-0.0678	0.215	0.202	0.188	0.294
345	334	Chromatin, DNA-binding, DNA repair or DNA replication protein	Hist1h4b; Hist1h4n	H4; H4H4	§78; §78	histone H4	P62806; NP_783588	http://www.phosphosite.org/proteinAction.do?id=1878&showAllSites=true	11; 11	VTYTEHAK*RKTVTAM; VTYTEHAK*RKTVTAM	DAVTYTEHAK*R	2	666.831	2837	2777	2762	2779	2876	2803		3182	2840	2770	2757	2784	2877	2807		3187	2.706	2.808	2.896	3.117	2.63	2.822		2.963	0.3153	0.3851	0.5854	0.8225	0.4676	0.74		-0.3383	0.323	0.418	0.411	0.451
346	335	Chromatin, DNA-binding, DNA repair or DNA replication protein	Hist1h4b; Hist1h4n	H4; H4H4	§9, §13; §9, §13	histone H4	P62806; NP_783588	http://www.phosphosite.org/proteinAction.do?id=1878&showAllSites=true	11; 11	SGRGKGGK*GLGKGGA, KGGKGLGK*GGAKRHR; SGRGKGGK*GLGKGGA, KGGKGLGK*GGAKRHR	GGK*GLGK*GGAK	2	507.291	2146	2119	2095		2202	2113	2392	2467	2171	2145	2122		2217	2137	2428	2487	2.586	2.635	2.434		2.736	2.266	2.901	2.753	-0.3894	-0.3529	-0.2444		-0.1615	0.0358	-0.4723	-0.7317	0.02	0.047	0.075
347	336	Chromatin, DNA-binding, DNA repair or DNA replication protein	Hist1h4b; Hist1h4n	H4; H4H4	§9, §13; §9, §13	histone H4	P62806; NP_783588	http://www.phosphosite.org/proteinAction.do?id=1878&showAllSites=true	11; 11	SGRGKGGK*GLGKGGA, KGGKGLGK*GGAKRHR; SGRGKGGK*GLGKGGA, KGGKGLGK*GGAKRHR	GGK*GLGK*GGAKR	2	585.341		1653	1645	1650		1635				1645	1638	1643		1636				3.28	3.044	2.828		3.516				0.3799	0.5141	0.5525		0.4226				0.242	0.274	0.203
348	337	Chromatin, DNA-binding, DNA repair or DNA replication protein	Hist1h4b; Hist1h4n	H4; H4H4	§9, §13; §9, §13	histone H4	P62806; NP_783588	http://www.phosphosite.org/proteinAction.do?id=1878&showAllSites=true	11; 11	SGRGKGGK*GLGKGGA, KGGKGLGK*GGAKRHR; SGRGKGGK*GLGKGGA, KGGKGLGK*GGAKRHR	GGK*GLGK*GGAKR	3	390.563						1627								1636								2.197								0.579
349	338	Chromatin, DNA-binding, DNA repair or DNA replication protein	Hist1h4b; Hist1h4n	H4; H4H4	§9, §13; §9, §13	histone H4	P62806; NP_783588	http://www.phosphosite.org/proteinAction.do?id=1878&showAllSites=true	11; 11	SGRGKGGK*GLGKGGA, KGGKGLGK*GGAKRHR; SGRGKGGK*GLGKGGA, KGGKGLGK*GGAKRHR	GKGGK*GLGK*GGAK	3	400.235							1780	1831							1782								3.374	2.837							2.5391	2.4565
350	339	Chromatin, DNA-binding, DNA repair or DNA replication protein	Hist1h4b; Hist1h4n	H4; H4H4	§9, §13, §17; §9, §13, §17	histone H4	P62806; NP_783588	http://www.phosphosite.org/proteinAction.do?id=1878&showAllSites=true	11; 11	SGRGKGGK*GLGKGGA, KGGKGLGK*GGAKRHR, GLGKGGAK*RHRKVLR; SGRGKGGK*GLGKGGA, KGGKGLGK*GGAKRHR, GLGKGGAK*RHRKVLR	GGK*GLGK*GGAK*R	2	606.346	2841	2854	2839	2867	2869	2889	3096	3262	2873	2813	2790	2839	2910	2840	3138	3217	4.129	3.804	3.939	3.697	3.841	3.781	3.786	3.916	1.359	1.3854	1.3507	1.4266	1.1345	0.9744	0.9405	0.688	0.32	0.347	0.281	0.315
351	340	Chromatin, DNA-binding, DNA repair or DNA replication protein	Hist1h4b; Hist1h4n	H4; H4H4	§9, §13, §17; §9, §13, §17	histone H4	P62806; NP_783588	http://www.phosphosite.org/proteinAction.do?id=1878&showAllSites=true	11; 11	SGRGKGGK*GLGKGGA, KGGKGLGK*GGAKRHR, GLGKGGAK*RHRKVLR; SGRGKGGK*GLGKGGA, KGGKGLGK*GGAKRHR, GLGKGGAK*RHRKVLR	GGK*GLGK*GGAK*R	2	606.346	2933	2768	2755	2781	2959	2798	3185	3167	2873	2813	2790	2839	2910	2840	3138	3217	3.26	3.76	3.881	3.61	3.567	3.607	3.686	3.743	1.3656	1.392	1.3523	1.4274	1.1336	0.9752	0.9356	0.688	0.196	0.307	0.305	0.321
352	341	Chromatin, DNA-binding, DNA repair or DNA replication protein	Hist1h4b; Hist1h4n	H4; H4H4	§9, §13, §17; §9, §13, §17	histone H4	P62806; NP_783588	http://www.phosphosite.org/proteinAction.do?id=1878&showAllSites=true	11; 11	SGRGKGGK*GLGKGGA, KGGKGLGK*GGAKRHR, GLGKGGAK*RHRKVLR; SGRGKGGK*GLGKGGA, KGGKGLGK*GGAKRHR, GLGKGGAK*RHRKVLR	GGK*GLGK*GGAK*R	2	606.346	3403		3331	3342	2091	3372			2873		2790	2839		2840			3.012		2.044	3.602	2.662	2.997			-0.0333		-0.0878	0.102	-1.1978	0.0434			0.281		0.122	0.344
353	342	Chromatin, DNA-binding, DNA repair or DNA replication protein	Hist1h4b; Hist1h4n	H4; H4H4	§9, §13, §17; §9, §13, §17	histone H4	P62806; NP_783588	http://www.phosphosite.org/proteinAction.do?id=1878&showAllSites=true	11; 11	SGRGKGGK*GLGKGGA, KGGKGLGK*GGAKRHR, GLGKGGAK*RHRKVLR; SGRGKGGK*GLGKGGA, KGGKGLGK*GGAKRHR, GLGKGGAK*RHRKVLR	GGK*GLGK*GGAK*R	2	606.346			1988								1980								3.187								0.4643								0.28
354	343	Chromatin, DNA-binding, DNA repair or DNA replication protein	Hist1h4b; Hist1h4n	H4; H4H4	§9, §13, §17; §9, §13, §17	histone H4	P62806; NP_783588	http://www.phosphosite.org/proteinAction.do?id=1878&showAllSites=true	11; 11	SGRGKGGK*GLGKGGA, KGGKGLGK*GGAKRHR, GLGKGGAK*RHRKVLR; SGRGKGGK*GLGKGGA, KGGKGLGK*GGAKRHR, GLGKGGAK*RHRKVLR	GGK*GLGK*GGAK*R	3	404.567	2852	2804	2780	2829	2911	2830	3106	3177	2873	2803	2790	2839	2910	2840	3147	3217	3.688	4.298	3.879	3.711	3.401	3.922	2.963	2.707	0.4602	0.4742	0.8671	0.9001	0.8704	0.6286	0.4429	0.1408	0.195	0.256	0.245	0.182
355	344	Chromatin, DNA-binding, DNA repair or DNA replication protein	Hist1h4b; Hist1h4n	H4; H4H4	§9, §13, §17; §9, §13, §17	histone H4	P62806; NP_783588	http://www.phosphosite.org/proteinAction.do?id=1878&showAllSites=true	11; 11	SGRGKGGK*GLGKGGA, KGGKGLGK*GGAKRHR, GLGKGGAK*RHRKVLR; SGRGKGGK*GLGKGGA, KGGKGLGK*GGAKRHR, GLGKGGAK*RHRKVLR	GKGGK*GLGK*GGAK*R	2	698.905	1992	2051	1948	2070	2041	1975	2240	2359	2046	2007	1980	2036	2072	2006	2274	2349	3.396	4.258	3.615	3.517	3.954	4.016	3.937	3.967	0.1724	0.1903	0.4044	0.3335	0.1803	0.1617	-0.0753	-0.401	0.341	0.391	0.321	0.315
356	345	Chromatin, DNA-binding, DNA repair or DNA replication protein	Hist1h4b; Hist1h4n	H4; H4H4	§9, §13, §17; §9, §13, §17	histone H4	P62806; NP_783588	http://www.phosphosite.org/proteinAction.do?id=1878&showAllSites=true	11; 11	SGRGKGGK*GLGKGGA, KGGKGLGK*GGAKRHR, GLGKGGAK*RHRKVLR; SGRGKGGK*GLGKGGA, KGGKGLGK*GGAKRHR, GLGKGGAK*RHRKVLR	GKGGK*GLGK*GGAK*R	2	698.905		1964		1989				2276		2007		2036				2349		3.711		3.359				3.822		0.2061		0.3357				-0.3888		0.33		0.392
357	346	Chromatin, DNA-binding, DNA repair or DNA replication protein	Hist1h4b; Hist1h4n	H4; H4H4	§9, §13, §17; §9, §13, §17	histone H4	P62806; NP_783588	http://www.phosphosite.org/proteinAction.do?id=1878&showAllSites=true	11; 11	SGRGKGGK*GLGKGGA, KGGKGLGK*GGAKRHR, GLGKGGAK*RHRKVLR; SGRGKGGK*GLGKGGA, KGGKGLGK*GGAKRHR, GLGKGGAK*RHRKVLR	GKGGK*GLGK*GGAK*R	3	466.272	2025						2229	2268	2046						2274	2336	3.69						3.792	3.849	1.1704						0.9857	0.2734	0.169
358	347	Chromatin, DNA-binding, DNA repair or DNA replication protein	Hist1h4b; Hist1h4n	H4; H4H4	§9, §13, §17; §9, §13, §17	histone H4	P62806; NP_783588	http://www.phosphosite.org/proteinAction.do?id=1878&showAllSites=true	11; 11	SGRGKGGK*GLGKGGA, KGGKGLGK*GGAKRHR, GLGKGGAK*RHRKVLR; SGRGKGGK*GLGKGGA, KGGKGLGK*GGAKRHR, GLGKGGAK*RHRKVLR	GKGGK*GLGK*GGAK*R	3	466.272	2020								2046								3.583								1.1876								0.161
359	348	Chromatin, DNA-binding, DNA repair or DNA replication protein	Hist1h4b; Hist1h4n	H4; H4H4	§9, §13, §17; §9, §13, §17	histone H4	P62806; NP_783588	http://www.phosphosite.org/proteinAction.do?id=1878&showAllSites=true	11; 11	SGRGKGGK*GLGKGGA, KGGKGLGK*GGAKRHR, GLGKGGAK*RHRKVLR; SGRGKGGK*GLGKGGA, KGGKGLGK*GGAKRHR, GLGKGGAK*RHRKVLR	GK*GLGK*GGAK*R	2	577.836	2870				2902		3131	3223	2873				2910		3147	3217	3.518				3.619		3.609	3.691	0.5035				0.7546		0.8646	0.1068	0.29
360	349	Chromatin, DNA-binding, DNA repair or DNA replication protein	Hist1h4b; Hist1h4n	H4; H4H4	§9, §13, §17; §9, §13, §17	histone H4	P62806; NP_783588	http://www.phosphosite.org/proteinAction.do?id=1878&showAllSites=true	11; 11	SGRGKGGK*GLGKGGA, KGGKGLGK*GGAKRHR, GLGKGGAK*RHRKVLR; SGRGKGGK*GLGKGGA, KGGKGLGK*GGAKRHR, GLGKGGAK*RHRKVLR	K*GLGK*GGAK*R	2	549.325			2729		2917														2.852		2.789						0.2652		0.1085						0.181
361	350	Chromatin, DNA-binding, DNA repair or DNA replication protein	Hist2h2bb	H2B1H	§13, §16, §17, §21	histone H2B type 2-B	Q64525	http://www.phosphosite.org/proteinAction.do?id=8391&showAllSites=true	14	KSAPAPKK*GSKKAVT, PAPKKGSK*KAVTKVQ, APKKGSKK*AVTKVQK, GSKKAVTK*VQKKDGK	K*GSK*K*AVTK*VQK	2	735.438	3502	3459	3456	3475	3560	3503	3788	3866	3539	3497	3492	3500	3598	3527	3813	3883	4.563	4.824	4.922	4.53	4.666	4.74	4.604	4.678	0.4689	0.5417	0.6513	0.8452	0.6241	0.6424	0.1342	-0.0719	0.41	0.396	0.41	0.446
362	351	Chromatin, DNA-binding, DNA repair or DNA replication protein	Hist2h2bb	H2B1H	§13, §16, §17, §21	histone H2B type 2-B	Q64525	http://www.phosphosite.org/proteinAction.do?id=8391&showAllSites=true	14	KSAPAPKK*GSKKAVT, PAPKKGSK*KAVTKVQ, APKKGSKK*AVTKVQK, GSKKAVTK*VQKKDGK	K*GSK*K*AVTK*VQK	3	490.628	3507	3465	3460	3481	3558	3506	3849	3865	3528	3497	3492	3511	3587	3527	3813	3894	4.287	4.019	4.323	4.64	4.032	4.019	3.613	3.695	0.2104	0.3315	0.6363	0.7316	0.5336	0.5098	0.1322	-0.1821	0.288	0.203	0.322	0.29
363	352	Chromatin, DNA-binding, DNA repair or DNA replication protein	Hist2h2bb	H2B1H	§13, §16, §21	histone H2B type 2-B	Q64525	http://www.phosphosite.org/proteinAction.do?id=8391&showAllSites=true	14	KSAPAPKK*GSKKAVT, PAPKKGSK*KAVTKVQ, GSKKAVTK*VQKKDGK	K*GSK*KAVTK*VQK	3	476.624	2237		2234	2276		2248	2535	2604	2252		2208	2234		2247	2511	2576	2.604		3.68	3.698		3.838	3.902	3.547	-0.339		0.2346	0.091		0.1499	-0.1394	-0.4819	0.151		0.224	0.183
364	353	Chromatin, DNA-binding, DNA repair or DNA replication protein	Hist2h2bb	H2B1H	§13, §17, §21	histone H2B type 2-B	Q64525	http://www.phosphosite.org/proteinAction.do?id=8391&showAllSites=true	14	KSAPAPKK*GSKKAVT, APKKGSKK*AVTKVQK, GSKKAVTK*VQKKDGK	K*GSKK*AVTK*VQK	3	476.624				2295								2234								2.573								0.091								0.12
365	354	Chromatin, DNA-binding, DNA repair or DNA replication protein	Hist2h2bb	H2B1H	§16, §17, §21	histone H2B type 2-B	Q64525	http://www.phosphosite.org/proteinAction.do?id=8391&showAllSites=true	14	PAPKKGSK*KAVTKVQ, APKKGSKK*AVTKVQK, GSKKAVTK*VQKKDGK	KGSK*K*AVTK*VQK	2	714.433					2300								2305								2.597								1.4742
366	355	Chromatin, DNA-binding, DNA repair or DNA replication protein	Hist2h2bb	H2B1H	§17, §21	histone H2B type 2-B	Q64525	http://www.phosphosite.org/proteinAction.do?id=8391&showAllSites=true	14	APKKGSKK*AVTKVQK, GSKKAVTK*VQKKDGK	K*AVTK*VQK	2	493.306	2059																2.355								-0.9174								0.008
367	356	Chromatin, DNA-binding, DNA repair or DNA replication protein	Hist2h2bb	H2B1H	§17, §21	histone H2B type 2-B	Q64525	http://www.phosphosite.org/proteinAction.do?id=8391&showAllSites=true	14	APKKGSKK*AVTKVQK, GSKKAVTK*VQKKDGK	K*AVTK*VQKK	2	557.353								1762								1753								2.775								-0.274
368	357	Chromatin, DNA-binding, DNA repair or DNA replication protein	Hist2h2bb	H2B1H	§17, §21, §24	histone H2B type 2-B	Q64525	http://www.phosphosite.org/proteinAction.do?id=8391&showAllSites=true	14	APKKGSKK*AVTKVQK, GSKKAVTK*VQKKDGK, KAVTKVQK*KDGKKRK	K*AVTK*VQK*K	2	578.358							3104	3186							3105								2.812	2.418							0.2199	-0.6142
369	358	Chromatin, DNA-binding, DNA repair or DNA replication protein	Hist2h2bb	H2B1H	§21	histone H2B type 2-B	Q64525	http://www.phosphosite.org/proteinAction.do?id=8391&showAllSites=true	14	GSKKAVTK*VQKKDGK	KAVTK*VQK	2	472.3	1262	1239	1241	1249	1321	1235	1514		1315		1265	1239	1291	1260	1518		1.81	1.804	2.628	2.326	2.235	2.171	2.853		-0.4721	-0.3683	-0.0185	-0.0418	0.151	0.1033	-0.6162		0.163	0.049	0.007	0.09
370	359	Chromatin, DNA-binding, DNA repair or DNA replication protein	Hist2h2bb	H2B1H	§21	histone H2B type 2-B	Q64525	http://www.phosphosite.org/proteinAction.do?id=8391&showAllSites=true	14	GSKKAVTK*VQKKDGK	KAVTK*VQK	2	472.3	1292		1210	1212		1274						1239					1.837		1.748	1.906		1.886			-0.5103		-0.1256	0.3111		0.0822			0.032		0.041	0.083
371	360	Chromatin, DNA-binding, DNA repair or DNA replication protein	Hist2h2bb	H2B1H	§21	histone H2B type 2-B	Q64525	http://www.phosphosite.org/proteinAction.do?id=8391&showAllSites=true	14	GSKKAVTK*VQKKDGK	KAVTK*VQK	2	472.3				1177																1.825								0.062								0.009
372	361	Chromatin, DNA-binding, DNA repair or DNA replication protein	Hist2h2be	H2B1L	§121	histone H2B type 2-E	Q64524	http://www.phosphosite.org/proteinAction.do?id=11535&showAllSites=true	14	EGTKAVTK*YTSAK--	AVTK*YTSAK	2	505.779	2194	2157	2135	2170	2241	2160	2438	2499	2193	2156	2133	2169	2228	2148	2436	2506	2.703	2.655	2.44	2.789	2.579	2.643	2.744	2.333	-0.4485	-0.0646	-0.2189	-0.0675	-0.1774	-0.0082	-0.3189	-0.8414	0.412	0.315	0.257	0.348
373	362	Chromatin, DNA-binding, DNA repair or DNA replication protein	Hist3h2ba	Hist3h2ba	12, §13, §16	histone H2B type 3-A	Q9D2U9	http://www.phosphosite.org/proteinAction.do?id=5143208&showAllSites=true	14	SRSTPAPK*KGSKKAI, RSTPAPKK*GSKKAIT, PAPKKGSK*KAITKAQ	STPAPK*K*GSK*K	2	627.856			1854	1902			2129	2172											1.334	1.51			1.662	1.602			0.1508	0.3859			-0.1409	-0.2262			0.134	0.2
374	363	Chromatin, DNA-binding, DNA repair or DNA replication protein	Hist3h2ba	Hist3h2ba	12, §13, §16, §17	histone H2B type 3-A	Q9D2U9	http://www.phosphosite.org/proteinAction.do?id=5143208&showAllSites=true	14	SRSTPAPK*KGSKKAI, RSTPAPKK*GSKKAIT, PAPKKGSK*KAITKAQ, APKKGSKK*AITKAQK	STPAPK*K*GSK*K*AITK	2	855.493	4233	4192					4514	4580		4173					4505	4584	1.594	2.951					2.518	2.294	0.4452	0.7867					0.923	0.4838	0.144	0.165
375	364	Chromatin, DNA-binding, DNA repair or DNA replication protein	Hist3h2ba	Hist3h2ba	12, §13, §16, §17	histone H2B type 3-A	Q9D2U9	http://www.phosphosite.org/proteinAction.do?id=5143208&showAllSites=true	14	SRSTPAPK*KGSKKAI, RSTPAPKK*GSKKAIT, PAPKKGSK*KAITKAQ, APKKGSKK*AITKAQK	STPAPK*K*GSK*K*AITK	3	570.665		4168																1.964								0.8002								0.023
376	365	Chromatin, DNA-binding, DNA repair or DNA replication protein	Hist3h2ba	Hist3h2ba	§13, §16, §17	histone H2B type 3-A	Q9D2U9	http://www.phosphosite.org/proteinAction.do?id=5143208&showAllSites=true	14	RSTPAPKK*GSKKAIT, PAPKKGSK*KAITKAQ, APKKGSKK*AITKAQK	K*GSK*K*AITK	2	543.83	2402	2364	2363	2611	2471	2414	2931	2982	2411	2384	2351	2399	2470	2390	2687	2742	3.607	3.167	3.559	3.111	3.811	2.821	3.557	3.545	-0.5196	-0.5104	-0.457	-0.1782	-0.388	-0.2408	-0.5472	-0.7221	0.205	0.123	0.213	0.085
377	366	Chromatin, DNA-binding, DNA repair or DNA replication protein	Hist3h2ba	Hist3h2ba	§13, §16, §17	histone H2B type 3-A	Q9D2U9	http://www.phosphosite.org/proteinAction.do?id=5143208&showAllSites=true	14	RSTPAPKK*GSKKAIT, PAPKKGSK*KAITKAQ, APKKGSKK*AITKAQK	K*GSK*K*AITK	2	543.83	2628				2680	2601	2677		2411				2470	2390	2687		3.08				3.02	2.299	3.208		-0.4828				-0.2629	-0.0365	-0.2868		0.226
378	367	Chromatin, DNA-binding, DNA repair or DNA replication protein	Hist3h2ba	Hist3h2ba	§13, §16, §17, §21	histone H2B type 3-A	Q9D2U9	http://www.phosphosite.org/proteinAction.do?id=5143208&showAllSites=true	14	RSTPAPKK*GSKKAIT, PAPKKGSK*KAITKAQ, APKKGSKK*AITKAQK, GSKKAITK*AQKKDGK	K*GSK*K*AITK*AQK	2	728.43	3486	3700	3707	3448	3534	3752	3775	3856	3528	3464	3470	3478	3565	3505	3791	3883	4.088	4.165	4.182	4.014	4.125	4.125	4.377	4.308	0.2427	0.1047	0.2118	0.5497	0.4144	0.558	0.1637	0.0683	0.421	0.357	0.369	0.343
379	368	Chromatin, DNA-binding, DNA repair or DNA replication protein	Hist3h2ba	Hist3h2ba	§13, §16, §17, §21	histone H2B type 3-A	Q9D2U9	http://www.phosphosite.org/proteinAction.do?id=5143208&showAllSites=true	14	RSTPAPKK*GSKKAIT, PAPKKGSK*KAITKAQ, APKKGSKK*AITKAQK, GSKKAITK*AQKKDGK	K*GSK*K*AITK*AQK	2	728.43	3763	3512	3430	3727	3804	3477	4056	4121	3528	3464	3470	3478	3565	3505	3791	3883	3.792	4.122	3.746	4.006	3.643	3.82	3.881	4.295	0.0545	0.2757	0.4515	0.2702	0.2558	0.6377	0.0318	-0.2944	0.328	0.397	0.257	0.362
380	369	Chromatin, DNA-binding, DNA repair or DNA replication protein	Hist3h2ba	Hist3h2ba	§13, §16, §17, §21	histone H2B type 3-A	Q9D2U9	http://www.phosphosite.org/proteinAction.do?id=5143208&showAllSites=true	14	RSTPAPKK*GSKKAIT, PAPKKGSK*KAITKAQ, APKKGSKK*AITKAQK, GSKKAITK*AQKKDGK	K*GSK*K*AITK*AQK	2	728.43		3427								3464								3.541								0.288								0.223
381	370	Chromatin, DNA-binding, DNA repair or DNA replication protein	Hist3h2ba	Hist3h2ba	§13, §16, §17, §21	histone H2B type 3-A	Q9D2U9	http://www.phosphosite.org/proteinAction.do?id=5143208&showAllSites=true	14	RSTPAPKK*GSKKAIT, PAPKKGSK*KAITKAQ, APKKGSKK*AITKAQK, GSKKAITK*AQKKDGK	K*GSK*K*AITK*AQK	3	485.956	3480	3434	3449	3513	3533	3479	3773	3855	3517	3464	3470	3478	3565	3505	3802	3883	3.112	3.424	3.743	3.623	3.757	3.704	3.603	4.43	0.0524	0.3595	0.6129	0.5882	0.3615	0.49	0.0552	-0.1014	0.116	0.165	0.236	0.116
382	371	Chromatin, DNA-binding, DNA repair or DNA replication protein	Hist3h2ba	Hist3h2ba	§13, §16, §17, §21	histone H2B type 3-A	Q9D2U9	http://www.phosphosite.org/proteinAction.do?id=5143208&showAllSites=true	14	RSTPAPKK*GSKKAIT, PAPKKGSK*KAITKAQ, APKKGSKK*AITKAQK, GSKKAITK*AQKKDGK	K*GSK*K*AITK*AQK	3	485.956	3771	3737	3705	3755	3844			4129	3517	3464	3470	3478	3565			3883	2.717	2.901	2.75	2.789	2.778			2.777	-0.0142	0.2585	0.1706	-0.0231	-0.1255			-0.2841	0.036	0.056	0.137	0.095
383	372	Chromatin, DNA-binding, DNA repair or DNA replication protein	Hist3h2ba	Hist3h2ba	§16, §17	histone H2B type 3-A	Q9D2U9	http://www.phosphosite.org/proteinAction.do?id=5143208&showAllSites=true	14	PAPKKGSK*KAITKAQ, APKKGSKK*AITKAQK	KGSK*K*AITK	2	522.824	1605						1792										1.872						1.688		-0.291						-0.6394		0.005
384	373	Chromatin, DNA-binding, DNA repair or DNA replication protein	Hist3h2ba	Hist3h2ba	§16, §17, §21	histone H2B type 3-A	Q9D2U9	http://www.phosphosite.org/proteinAction.do?id=5143208&showAllSites=true	14	PAPKKGSK*KAITKAQ, APKKGSKK*AITKAQK, GSKKAITK*AQKKDGK	KGSK*K*AITK*AQK	2	707.425	2223		2163	2198	2280		2477		2204		2164	2179	2261		2489		3.039		3.087	3.121	2.428		2.619		-0.1294		0.8502	0.2631	1.119		1.0122		0.269		0.227	0.268
385	374	Chromatin, DNA-binding, DNA repair or DNA replication protein	Hist3h2ba	Hist3h2ba	§16, §17, §21	histone H2B type 3-A	Q9D2U9	http://www.phosphosite.org/proteinAction.do?id=5143208&showAllSites=true	14	PAPKKGSK*KAITKAQ, APKKGSKK*AITKAQK, GSKKAITK*AQKKDGK	KGSK*K*AITK*AQK	3	471.952					2286		2462	2522					2437		2654	2516					2.485		3.155	3.565					-0.1436		0.1606	-0.343
386	375	Chromatin, DNA-binding, DNA repair or DNA replication protein	Hist3h2ba	Hist3h2ba	§17, §21	histone H2B type 3-A	Q9D2U9	http://www.phosphosite.org/proteinAction.do?id=5143208&showAllSites=true	14	APKKGSKK*AITKAQK, GSKKAITK*AQKKDGK	K*AITK*AQK	2	486.298	2009				2057	1979	2257	2289	2024							2301	1.879				1.796	2.042	2.155	2.513	-0.4036				-0.136	-0.4231	-0.5261	-0.8091	0.058
387	376	Chromatin, DNA-binding, DNA repair or DNA replication protein	Hist3h2ba	Hist3h2ba	§17, §21, 24	histone H2B type 3-A	Q9D2U9	http://www.phosphosite.org/proteinAction.do?id=5143208&showAllSites=true	14	APKKGSKK*AITKAQK, GSKKAITK*AQKKDGK, KAITKAQK*KDGKKRK	K*AITK*AQK*K	2	571.351								3012								3023								2.882								-0.2565
388	377	Chromatin, DNA-binding, DNA repair or DNA replication protein	Hmga1; Hmga1; Hmga1	HMGA1; HMGA1 iso2; HMGA1 iso3	§15; §15; §15	high mobility group protein HMG-I/HMG-Y isoform a	P17095; P17095-1; Q3TE85	http://www.phosphosite.org/proteinAction.do?id=5179&showAllSites=true	12; 11; 11	SSQPLASK*QEKDGTE; SSQPLASK*QEKDGTE; SSQPLASK*QEKDGTE	SSQPLASK*QEK	2	622.828	2084	2038	2026	2059	2112	2040	2312	2458	2106	2079	2053	2089	2151	2073	2340	2412	2.825	2.454	2.534	2.595	2.778	2.916	2.979	2.36	-0.3719	-0.3124	-0.2867	-0.1951	-0.3943	-0.179	-0.396	-0.4514	0.221	0.054	0.286	0.12
389	378	Chromatin, DNA-binding, DNA repair or DNA replication protein	Hmga1; Hmga1; Hmga1	HMGA1; HMGA1 iso2; HMGA1 iso3	§15; §15; §15	high mobility group protein HMG-I/HMG-Y isoform a	P17095; P17095-1; Q3TE85	http://www.phosphosite.org/proteinAction.do?id=5179&showAllSites=true	12; 11; 11	SSQPLASK*QEKDGTE; SSQPLASK*QEKDGTE; SSQPLASK*QEKDGTE	SSQPLASK*QEK	2	622.828					2199			2379					2151			2412					2.48			2.259					-0.2754			-0.4691
390	379	Chromatin, DNA-binding, DNA repair or DNA replication protein	Hmga1; Hmga1; Hmga1	HMGA1; HMGA1 iso2; HMGA1 iso3	§15; §15; §15	high mobility group protein HMG-I/HMG-Y isoform a	P17095; P17095-1; Q3TE85	http://www.phosphosite.org/proteinAction.do?id=5179&showAllSites=true	12; 11; 11	SSQPLASK*QEKDGTE; SSQPLASK*QEKDGTE; SSQPLASK*QEKDGTE	SSQPLASK*QEK	3	415.554	2118	2082	2054	2092	2152	2076	2357	2414		2079	2053	2089			2343	2416	2.233	2.079	2.161	2.654	2.159	2.415	2.65	2.495	0.7096	1.0374	0.8172	0.892	0.4709	0.5891	0.5023	0.3537	0.061	0.137	0.088	0.057
391	380	Chromatin, DNA-binding, DNA repair or DNA replication protein	Hmga1; Hmga1; Hmga1	HMGA1; HMGA1 iso2; HMGA1 iso3	§15; §15; §15	high mobility group protein HMG-I/HMG-Y isoform a	P17095; P17095-1; Q3TE85	http://www.phosphosite.org/proteinAction.do?id=5179&showAllSites=true	12; 11; 11	SSQPLASK*QEKDGTE; SSQPLASK*QEKDGTE; SSQPLASK*QEKDGTE	SSQPLASK*QEKDGTEKR	3	644.332				1569	1634			1842				1566				1840				2.676	1.901			2.658				0.5602	0.4675			-0.3279				0.225
392	381	Chromatin, DNA-binding, DNA repair or DNA replication protein	Hmga1; Hmga1; Hmga1	HMGA1; HMGA1 iso2; HMGA1 iso3	§18; §18; §18	high mobility group protein HMG-I/HMG-Y isoform a	P17095; P17095-1; Q3TE85	http://www.phosphosite.org/proteinAction.do?id=5179&showAllSites=true	12; 11; 11	PLASKQEK*DGTEKRG; PLASKQEK*DGTEKRG; PLASKQEK*DGTEKRG	SSQPLASKQEK*DGTEKR	3	644.332			1573			1541	1783				1572			1559	1782				2.064			2.106	2.21				0.4841			0.5763	0.4095				0.201
393	382	Chromatin, DNA-binding, DNA repair or DNA replication protein	Hmgb1; Hmgb2; LOC637733	HMG1L1; HMGB2; LOC637733	154; §154; 154	high mobility group protein B1	P63158; P30681; XP_918585	http://www.phosphosite.org/proteinAction.do?id=6935&showAllSites=true	25; 24; 25	KAAKLKEK*YEKDIAA; KAAKLKEK*YEKDIAA; KAAKLKEK*YEKDIAA	LKEK*YEKDIAAYR	3	556.97		4366	4355	4368	4496	4430	4733			4382	4334	4358	4509	4442	4736			3.837	3.408	2.946	3.567	3.651	3.888			-0.0286	0.3099	0.3267	0.7036	0.7018	-0.3923			0.393	0.295	0.297
394	383	Chromatin, DNA-binding, DNA repair or DNA replication protein	Hmgb1; LOC637733	HMG1L1; LOC637733	§59; 59	high mobility group protein B1	P63158; XP_918585	http://www.phosphosite.org/proteinAction.do?id=6935&showAllSites=true	25; 25	MSAKEKGK*FEDMAKA; MSAKEKGK*FEDMAKA	EKGK*FEDM#AK	2	620.798		1820																1.929								0.72								0.142
395	384	Chromatin, DNA-binding, DNA repair or DNA replication protein	Hmgb1; LOC637733	HMG1L1; LOC637733	§59; 59	high mobility group protein B1	P63158; XP_918585	http://www.phosphosite.org/proteinAction.do?id=6935&showAllSites=true	25; 25	MSAKEKGK*FEDMAKA; MSAKEKGK*FEDMAKA	GK*FEDMAK	2	484.231								4963								4979								2.466								-0.2956
396	385	Chromatin, DNA-binding, DNA repair or DNA replication protein	Hmgb1; LOC637733	HMG1L1; LOC637733	§59; 59	high mobility group protein B1	P63158; XP_918585	http://www.phosphosite.org/proteinAction.do?id=6935&showAllSites=true	25; 25	MSAKEKGK*FEDMAKA; MSAKEKGK*FEDMAKA	GK*FEDM#AK	2	492.229						2427	2760															1.396	1.574							-0.0759	-0.6036
397	386	Chromatin, DNA-binding, DNA repair or DNA replication protein	Hmgb3	HMGB3	165	high mobility group protein B3	O54879	http://www.phosphosite.org/proteinAction.do?id=9556&showAllSites=true	23	ADYKSKGK*FDGAKGP	GK*FDGAK	2	382.7	2384								2367								1.94								-0.1374								0.07
398	387	Chromatin, DNA-binding, DNA repair or DNA replication protein	Hmgb3	HMGB3	165	high mobility group protein B3	O54879	http://www.phosphosite.org/proteinAction.do?id=9556&showAllSites=true	23	ADYKSKGK*FDGAKGP	GK*FDGAKGPAK	2	559.304					2193	2123	2393	2496					2206	2115	2387						2.709	2.643	2.416	1.961					0.7673	0.2153	0.0014	-0.7976
399	388	Chromatin, DNA-binding, DNA repair or DNA replication protein	Hmgb3	HMGB3	§59	high mobility group protein B3	O54879	http://www.phosphosite.org/proteinAction.do?id=9556&showAllSites=true	23	MSSKEKSK*FDEMAKA	SK*FDEM#AK	2	507.234		2637																1.743								0.3174								0.072
400	389	Chromatin, DNA-binding, DNA repair or DNA replication protein	Hmgn1	HMGN1	§13	non-histone chromosomal protein HMG-14	P18608	http://www.phosphosite.org/proteinAction.do?id=1303&showAllSites=true	10	VSADGAAK*AEPKRRS	VSADGAAK*AEPK	2	593.309	2140		2082			2096	2368	2435	2138		2069			2093	2354	2432	3.256		3.335			3.136	3.396	3.212	0.3163		0.1003			0.4849	0.7835	-0.3762	0.254		0.192
401	390	Chromatin, DNA-binding, DNA repair or DNA replication protein	Hmgn2	HMGN2	§31	non-histone chromosomal protein HMG-17	P09602	http://www.phosphosite.org/proteinAction.do?id=12265&showAllSites=true	9	RSARLSAK*PAPPKPE	LSAK*PAPPKPEPKPK	4	407.495					2222								2250								2.013								0.5851
402	391	Chromatin, DNA-binding, DNA repair or DNA replication protein	Hmgn2	HMGN2	59	non-histone chromosomal protein HMG-17	P09602	http://www.phosphosite.org/proteinAction.do?id=12265&showAllSites=true	9	VPKGKKGK*ADAGKDA	GK*ADAGKDANNPAENGDAK	3	628.961					1584								1578								2.875								0.5457
403	392	Chromatin, DNA-binding, DNA repair or DNA replication protein	Hmgn2	HMGN2	§64	non-histone chromosomal protein HMG-17	P09602	http://www.phosphosite.org/proteinAction.do?id=12265&showAllSites=true	9	KGKADAGK*DANNPAE	ADAGK*DANNPAENGDAK	2	850.38	1795	1751	1733	1773	1808	1741	1988	2043	1807	1777	1737	1797	1820	1746	2001	2059	4.212	4.62	3.987	3.621	3.76	3.969	3.778	4.765	1.0286	0.685	1.3516	1.121	1.2245	0.8727	0.7509	-0.6858	0.528	0.523	0.57	0.511
404	393	Chromatin, DNA-binding, DNA repair or DNA replication protein	Hmgn2	HMGN2	§64	non-histone chromosomal protein HMG-17	P09602	http://www.phosphosite.org/proteinAction.do?id=12265&showAllSites=true	9	KGKADAGK*DANNPAE	ADAGK*DANNPAENGDAKTDQAQK	3	791.03	1726		1665		1740		1911	1939	1719		1660		1732		1913	1933	2.647		2.926		3.205		3.012	2.605	0.3994		0.7516		1.2362		1.5639	1.8043	0.252		0.334
405	394	Chromatin, DNA-binding, DNA repair or DNA replication protein	Hmgn2	HMGN2	§64	non-histone chromosomal protein HMG-17	P09602	http://www.phosphosite.org/proteinAction.do?id=12265&showAllSites=true	9	KGKADAGK*DANNPAE	ADAGK*DANNPAENGDAKTDQAQKAEGAGDAK	4	768.354			1985	2043								2055							2.379	2.337							1.5588	0.2655							0.004	0.208
406	395	Chromatin, DNA-binding, DNA repair or DNA replication protein	Hmgn2	HMGN2	§64	non-histone chromosomal protein HMG-17	P09602	http://www.phosphosite.org/proteinAction.do?id=12265&showAllSites=true	9	KGKADAGK*DANNPAE	GKADAGK*DANNPAENGDAK	3	628.961		1520	1501	1514		1499		1767		1524	1517	1511				1775		3.028	3.853	4.196		3.66		2.881		0.2672	0.5176	0.8009		0.611		0.1685		0.001	0.046	0.028
407	396	Chromatin, DNA-binding, DNA repair or DNA replication protein	Prr12	PRR12	§1214	proline rich 12	Q69ZN8	http://www.phosphosite.org/proteinAction.do?id=15928&showAllSites=true	212	GTRLEPLK*PLKIKLS	LEPLK*PLK	2	490.313	6337								6325								1.411								-0.2293								0.2
408	397	Chromatin, DNA-binding, DNA repair or DNA replication protein	Pura	PURA	§272	transcriptional activator protein Pur-alpha	P42669	http://www.phosphosite.org/proteinAction.do?id=13141&showAllSites=true	35	KFGHTFCK*YSEEMKK	FGHTFCK*YSEEM#K	3	574.582	4381			4288	4439	4352		4788	4366			4281	4421	4332		4781	3.512			3.741	2.635	2.653		3.173	0.5185			0.5359	0.4139	0.2972		0.2652	0.42			0.139
409	398	Chromatin, DNA-binding, DNA repair or DNA replication protein	Pura	PURA	§272	transcriptional activator protein Pur-alpha	P42669	http://www.phosphosite.org/proteinAction.do?id=13141&showAllSites=true	35	KFGHTFCK*YSEEMKK	FGHTFCK*YSEEMKK	4	459.213							4833								4857								3.119								0.1659
410	399	Chromatin, DNA-binding, DNA repair or DNA replication protein	Rad23a; Rad23a	RAD23A; RAD23A iso2	78; 78	UV excision repair protein RAD23 homolog A	P54726; NP_033036	http://www.phosphosite.org/proteinAction.do?id=12045&showAllSites=true	40; 40	FVVVMVTK*AKAGQGI; FVVVMVTK*AKAGQGI	NFVVVMVTK*AK	3	426.581			4904		5044						4947								1.936		1.639						0.1395		0.1379						0.266
411	400	Chromatin, DNA-binding, DNA repair or DNA replication protein	Rad23a; Rad23a	RAD23A; RAD23A iso2	80; 80	UV excision repair protein RAD23 homolog A	P54726; NP_033036	http://www.phosphosite.org/proteinAction.do?id=12045&showAllSites=true	40; 40	VVMVTKAK*AGQGIPA; VVMVTKAK*AGQGIPA	NFVVVMVTKAK*	3	426.581	5011						5309								5319		1.694						2		0.2999						0.0135		0.015
412	401	Chromatin, DNA-binding, DNA repair or DNA replication protein	Set	SET	23	protein SET isoform 2	Q9EQU5	http://www.phosphosite.org/proteinAction.do?id=5132&showAllSites=true	33	PRPAAAPK*LEDKSAS	KPRPAAAPK*LEDK	3	488.284						1709	1955							1713	1957							2.334	2.819							0.6194	0.3678
413	402	Chromatin, DNA-binding, DNA repair or DNA replication protein	Set; Set	SET; SET iso2	§82; §70	protein SET isoform 2	Q9EQU5; Q9EQU5-2	http://www.phosphosite.org/proteinAction.do?id=5132&showAllSites=true	33; 32	LRQPFFQK*RSELIAK; LRQPFFQK*RSELIAK	LRQPFFQK*R	3	421.244					5340		5630						5336		5638						2.361		1.878						1.9786		1.8106
414	403	Chromatin, DNA-binding, DNA repair or DNA replication protein	Spin1; Spin1	SPIN1; SPIN1 iso2	44; 22	spindlin-1 isoform 1	Q61142; Q3TQU2	http://www.phosphosite.org/proteinAction.do?id=17419&showAllSites=true	30; 25	RTSVGPSK*PVSQPRR; RTSVGPSK*PVSQPRR	TSVGPSK*PVSQPR	2	691.375						3183								3174								2.518								0.898
415	404	Chromatin, DNA-binding, DNA repair or DNA replication protein	Terf1	TRF1	249, 255	telomeric repeat-binding factor 1	P70371	http://www.phosphosite.org/proteinAction.do?id=1486&showAllSites=true	48	FLMKAATK*VVENEKA, TKVVENEK*ARTQASK	VGDVLSEKSSTFLMKAATK*VVENEK*	4	699.369					15930																2.324								1.0492
416	405	Chromatin, DNA-binding, DNA repair or DNA replication protein	Zbtb17	ZBTB17	435, 438	zinc finger and BTB domain-containing protein 17	Q60821	http://www.phosphosite.org/proteinAction.do?id=19125&showAllSites=true	87	LETHDTDK*EHKCPHC, HDTDKEHK*CPHCDKK	MRHLETHDTDK*EHK*	4	465.972					4296																2.237								2.644
417	406	Chromatin, DNA-binding, DNA repair or DNA replication protein	Zfp422	ZNF22	§18	zinc finger protein 22	Q9ERU3	http://www.phosphosite.org/proteinAction.do?id=12245&showAllSites=true	27	SRSASQGK*AYESKRK	SASQGK*AYESK	2	599.291						1586								1581								2.409								-0.0497
418	Cytoskeletal protein
419	407	Cytoskeletal protein	Actr6	ACTR6	§260	actin-related protein 6	Q9D864	http://www.phosphosite.org/proteinAction.do?id=10166367&showAllSites=true	46	EEMVLSGK*YKSGEQI	EEMVLSGK*YK	2	613.31		5697			5838	5792	6151	6238		5711			5842	5815	6177	6262		2.536			3.026	2.676	2.627	1.999		-1.1621			-1.0389	-0.4971	-0.2727	-0.6268		0.296
420	408	Cytoskeletal protein	Actr6	ACTR6	§260	actin-related protein 6	Q9D864	http://www.phosphosite.org/proteinAction.do?id=10166367&showAllSites=true	46	EEMVLSGK*YKSGEQI	EEM#VLSGK*YK	2	621.308		4247	4244	4255	4386					4261	4268	4281						2.015	2.029	2.022	1.866					0.0331	0.6122	0.4205	0.9078					0.142	0.208	0.202
421	409	Cytoskeletal protein	Ina	INA	§290	alpha-internexin	P46660	http://www.phosphosite.org/proteinAction.do?id=13293&showAllSites=true	56	AEEWYKSK*FANLNEQ	SK*FANLNEQAAR	2	695.857	5182	5059	5061	5083	5192	5131	5478	5590	5184	5075	5068	5095	5196	5133	5484	5581	3.642	3.947	4.29	3.937	4.011	4.148	3.977	3.457	-0.3028	0.3782	0.4789	0.5069	0.1272	0.3005	0.1136	0.0633	0.296	0.305	0.337	0.33
422	410	Cytoskeletal protein	Kif14	KIF14	691, 699	kinesin-like protein KIF14	Q7TQJ9	http://www.phosphosite.org/proteinAction.do?id=14299&showAllSites=true	181	RLIVNIAK*VNEDMNA, VNEDMNAK*LIRELKA	LIVNIAK*VNEDMNAK*LIR	4	535.306								9897																1.935								0.29
423	411	Cytoskeletal protein	Kif5c	KIF5C	507	kinesin heavy chain isoform 5C	P28738	http://www.phosphosite.org/proteinAction.do?id=23611&showAllSites=true	109	KSQEVEDK*TRANEQL	SQEVEDK*TR	2	567.275		1710	1703															1.776	1.705							-1.051	0.0561							0.041	0.005
424	412	Cytoskeletal protein	Lmnb1	Lamin B1	112	lamin-B1	P14733	http://www.phosphosite.org/proteinAction.do?id=2157&showAllSites=true	67	QIELGKFK*AEHDQLL	FK*AEHDQLLLNYAK	3	577.974							7833	7899							7838	7879							3.433	3.082							1.1053	1.9102
425	413	Cytoskeletal protein	Lmnb1	Lamin B1	262	lamin-B1	P14733	http://www.phosphosite.org/proteinAction.do?id=2157&showAllSites=true	67	DAQVRLYK*EELEQTY	LYK*EELEQTYHAK	3	565.286			5911																1.514								-0.8961								0.018
426	414	Cytoskeletal protein	Lmnb1	Lamin B1	§272	lamin-B1	P14733	http://www.phosphosite.org/proteinAction.do?id=2157&showAllSites=true	67	LEQTYHAK*LENARLS	LYKEELEQTYHAK*LENAR	3	759.722	7070	7006	6969	7029	7141			7514	7061	7009	7004		7159			7505	2.736	2.473	2.122	2.092	3.336			2.47	-0.091	-0.0769	0.9406	0.8918	0.2788			0.1883	0.147	0.318	0.133	0.029
427	415	Cytoskeletal protein	Lmnb1	Lamin B1	§272	lamin-B1	P14733	http://www.phosphosite.org/proteinAction.do?id=2157&showAllSites=true	67	LEQTYHAK*LENARLS	LYKEELEQTYHAK*LENAR	4	570.043			6984	7006			7412	7493			6971	7031			7453	7527			3.672	3.768			3.357	3.164			0.3785	0.7469			0.346	-0.1547			0.081	0.258
428	416	Cytoskeletal protein	Lmnb1	Lamin B1	§484	lamin-B1	P14733	http://www.phosphosite.org/proteinAction.do?id=2157&showAllSites=true	67	GDTSVSYK*YTSRYVL	KIGDTSVSYK*YTSR	3	549.618								4773								4792								2.822								2.9348
429	417	Cytoskeletal protein	Mapre2	RP1	237	microtubule-associated protein RP/EB family member 2 isoform 2	Q8R001	http://www.phosphosite.org/proteinAction.do?id=2773&showAllSites=true	37	GSASRSDK*DLETQVI	SDK*DLETQVIQLNEQVHSLK	3	789.411	10639	10623	10665	10677	10848	10793	11298	11260			10678			10809	11314	11256	2.629	2.112	2.773	2.391	2.979	2.968	2.936	2.886	-1.1089	-0.9091	-0.7459	-0.9141	-1.21	-1.0857	-1.1542	-1.4073	0.166	0.036	0.196	0.218
430	418	Cytoskeletal protein	Mapt; Mapt; Mapt	tau; tau iso3; tau iso7	603; 300; 260	microtubule-associated protein tau isoform a	P10637; P10637-2; B1AQW2	http://www.phosphosite.org/proteinAction.do?id=1501&showAllSites=true	76; 45; 41	GSVQIVYK*PVDLSKV; GSVQIVYK*PVDLSKV; GSVQIVYK*PVDLSKV	VQIVYK*PVDLSK	2	715.916	8451	8434	8440	8488	8596	8568	8997	8977	8502	8483	8489	8527	8633	8598	9004	9012	3.023	3.099	3.136	3.298	3.215	3.343	3.666	3.706	0.2097	0.425	0.5172	0.5662	0.2419	0.3991	0.2412	-0.1809	0.3	0.336	0.349	0.391
431	419	Cytoskeletal protein	Mapt; Mapt; Mapt	tau; tau iso3; tau iso7	603; 300; 260	microtubule-associated protein tau isoform a	P10637; P10637-2; B1AQW2	http://www.phosphosite.org/proteinAction.do?id=1501&showAllSites=true	76; 45; 41	GSVQIVYK*PVDLSKV; GSVQIVYK*PVDLSKV; GSVQIVYK*PVDLSKV	VQIVYK*PVDLSK	2	715.916	8540		8524				9041		8502		8489				9004		2.812		3.107				3.421		0.2083		0.5221				0.2412		0.326		0.353
432	420	Cytoskeletal protein	Mtap6; Mtap6	MAP6; MAP6 iso3	254; 51	microtubule-associated protein 6 isoform 3	O55129; Q7TSJ2-3	http://www.phosphosite.org/proteinAction.do?id=8692&showAllSites=true	96; 33	RNEGHEEK*PLPPAQS; RNEGHEEK*PLPPAQS	NEGHEEK*PLPPAQSQTQEGGPAAGK	3	867.084	3235	3182	3178	3182	3293	3217	3505	3574	3272	3209	3201	3185	3306	3251	3528	3597	4.369	3.832	3.932	4.515	4.17	4.433	4.423	4.311	0.6984	0.8038	0.6484	1.3075	0.6854	0.8573	0.715	0.3953	0.355	0.489	0.34	0.456
433	421	Cytoskeletal protein	Mtap6; Mtap6	MAP6; MAP6 iso3	254; 51	microtubule-associated protein 6 isoform 3	O55129; Q7TSJ2-3	http://www.phosphosite.org/proteinAction.do?id=8692&showAllSites=true	96; 33	RNEGHEEK*PLPPAQS; RNEGHEEK*PLPPAQS	NEGHEEK*PLPPAQSQTQEGGPAAGK	3	867.084	3335	3285	3261	3270					3272	3209	3201	3185					4.117	2.859	3.736	3.861					0.4807	0.533	0.6307	0.8181					0.337	0.33	0.335	0.382
434	422	Cytoskeletal protein	Mtap6; Mtap6	MAP6; MAP6 iso3	254; 51	microtubule-associated protein 6 isoform 3	O55129; Q7TSJ2-3	http://www.phosphosite.org/proteinAction.do?id=8692&showAllSites=true	96; 33	RNEGHEEK*PLPPAQS; RNEGHEEK*PLPPAQS	NEGHEEK*PLPPAQSQTQEGGPAAGK	3	867.084	3248								3272								4.009								0.675								0.491
435	423	Cytoskeletal protein	Mtap6; Mtap6	MAP6; MAP6 iso3	300; 97	microtubule-associated protein 6 isoform 3	O55129; Q7TSJ2-3	http://www.phosphosite.org/proteinAction.do?id=8692&showAllSites=true	96; 33	RSEGHEEK*PLPPAQS; RSEGHEEK*PLPPAQS	SEGHEEK*PLPPAQSQTQEGGPAAGK	3	858.081	3259	3208	3210	3206	3313	3239	3516	3595	3305	3231	3223	3262	3339	3306	3572	3608	4.106	4.88	4.539	3.027	3.992	3.603	4.391	3.945	-0.0597	0.338	0.263	0.212	0.1518	0.191	0.2501	0.1086	0.406	0.555	0.519	0.365
436	424	Cytoskeletal protein	Mtap6; Mtap6	MAP6; MAP6 iso3	300; 97	microtubule-associated protein 6 isoform 3	O55129; Q7TSJ2-3	http://www.phosphosite.org/proteinAction.do?id=8692&showAllSites=true	96; 33	RSEGHEEK*PLPPAQS; RSEGHEEK*PLPPAQS	SEGHEEK*PLPPAQSQTQEGGPAAGK	3	858.081						3248		3596						3306		3608						3.169		3.508						0.191		0.1086
437	425	Cytoskeletal protein	Mtap6; Mtap6	MAP6; MAP6 iso3	453; 250	microtubule-associated protein 6 isoform 3	O55129; Q7TSJ2-3	http://www.phosphosite.org/proteinAction.do?id=8692&showAllSites=true	96; 33	IKAKPQYK*PPDDKMV; IKAKPQYK*PPDDKMV	AKPQYK*PPDDK	2	664.846		1873																1.399								2.6866								0.096
438	426	Cytoskeletal protein	Mtap7d3	RP11-535K18.3	752	MAP7 domain-containing protein 3	A2AEY4	http://www.phosphosite.org/proteinAction.do?id=5140289&showAllSites=true	98	KGSKLSAK*KPPTRPI	KGSKLSAK*	2	430.764				4706																1.847								0.3775								0.028
439	427	Cytoskeletal protein	Nefm	NFM	296	neurofilament medium polypeptide	P08553	http://www.phosphosite.org/proteinAction.do?id=2399&showAllSites=true	96	WFKCRYAK*LTEAAEQ	YAK*LTEAAEQNK	2	704.359	4111	4027	4025	4041	4166				4124	4030	4026	4039					3.438	3.827	3.408	3.483	2.313				0.6	1.169	0.9346	1.3466	2.4079				0.327	0.286	0.278	0.344
440	428	Cytoskeletal protein	Nefm	NFM	296	neurofilament medium polypeptide	P08553	http://www.phosphosite.org/proteinAction.do?id=2399&showAllSites=true	96	WFKCRYAK*LTEAAEQ	YAK*LTEAAEQNKEAIR	3	626.33			4780																1.995								0.0958								0.033
441	429	Cytoskeletal protein	Stmn1	STMN1	§119	stathmin	P54227	http://www.phosphosite.org/proteinAction.do?id=1533&showAllSites=true	17	REAQMAAK*LERLREK	EAQMAAK*LER	2	594.806	4803			4769	4868		5112	5239	4801			4743	4845		5143	5240	3.083			2.906	2.953		2.778	2.851	0.0643			0.1485	0.3184		0.0021	-0.2402	0.225			0.212
442	430	Cytoskeletal protein	Stmn1	STMN1	§119	stathmin	P54227	http://www.phosphosite.org/proteinAction.do?id=1533&showAllSites=true	17	REAQMAAK*LERLREK	EAQM#AAK*LER	2	602.803	2481		2431	2490	2540	2473	2812	2901	2510		2428	2465	2536	2478			2.061		2.134	2.337	2.191	2.334	2.271	2.028	0.0181		0.4656	0.3162	0.2655	0.3934	-0.4119	-0.5323	0.088		0.112	0.217
443	431	Cytoskeletal protein	Stmn1	STMN1	137	stathmin	P54227	http://www.phosphosite.org/proteinAction.do?id=1533&showAllSites=true	17	VEEVRKNK*ESKDPAD	NK*ESKDPADETEAD	2	795.842	1914	1885	1832	1883	1956	1871	2130	2174	1906	1898	1847	1885	1952	1876	2133	2180	3.001	2.782	2.635	2.608	2.534	3.184	2.741	3.664	0.3326	0.9355	1.0561	1.1423	0.7783	1.0474	0.5231	-0.1075	0.45	0.486	0.4	0.448
444	432	Cytoskeletal protein	Tubb2b	TUBB2B	58	tubulin beta-2B chain	Q9CWF2	http://www.phosphosite.org/proteinAction.do?id=19277&showAllSites=true	50	YNEATGNK*YVPRAIL	INVYYNEATGNK*YVPR	2	971.986	7696	7661	7640	7667	7789	7760	8132	8168	7721	7669	7653	7680	7797	7784	8157	8176	4.37	4.352	4.601	4.214	3.685	4.691	4.306	4.491	1.1171	1.0852	0.8644	1.2215	0.9163	0.5473	0.4403	0.2087	0.52	0.508	0.529	0.505
445	433	Cytoskeletal protein	Tubb2b	TUBB2B	58	tubulin beta-2B chain	Q9CWF2	http://www.phosphosite.org/proteinAction.do?id=19277&showAllSites=true	50	YNEATGNK*YVPRAIL	INVYYNEATGNK*YVPR	3	648.327			7629	7664	7781	7746		8167			7653	7680	7797	7784		8187			3.645	3.121	2.999	3.217		3.732			0.2941	0.693	0.2967	0.4367		0.2401			0.371	0.307
446	434	Cytoskeletal protein	Tubb2b	TUBB2B	58	tubulin beta-2B chain	Q9CWF2	http://www.phosphosite.org/proteinAction.do?id=19277&showAllSites=true	50	YNEATGNK*YVPRAIL	INVYYNEATGNK*YVPR	3	648.327								8190								8187								3.382								0.2401
447	ENZYME, MISC.
448	435	ENZYME, MISC.	Acat1	ACAT1	§171	acetyl-CoA acetyltransferase, mitochondrial precursor	Q8QZT1	http://www.phosphosite.org/proteinAction.do?id=9173&showAllSites=true	45	ATPYGGVK*LEDLIVK	GATPYGGVK*LEDLIVK	2	851.475			11381	11419		11521	12070	11988			11406	11456			12087	12019			1.732	1.63		1.627	3.744	2.873			0.7946	0.8998		0.8816	0.539	0.3739			0.136	0.208
449	436	ENZYME, MISC.	Acat1	ACAT1	§171	acetyl-CoA acetyltransferase, mitochondrial precursor	Q8QZT1	http://www.phosphosite.org/proteinAction.do?id=9173&showAllSites=true	45	ATPYGGVK*LEDLIVK	GATPYGGVK*LEDLIVK	3	567.986							12091																2.191								0.4961
450	437	ENZYME, MISC.	Acat1	ACAT1	§171	acetyl-CoA acetyltransferase, mitochondrial precursor	Q8QZT1	http://www.phosphosite.org/proteinAction.do?id=9173&showAllSites=true	45	ATPYGGVK*LEDLIVK	GATPYGGVK*LEDLIVKDGLTDVYNK	3	903.144	12662	12668	12717	12759	12926	12854	13433	13355	12681	12681	12737	12776	12952	12862	13451	13372	3.093	2.916	4.054	2.891	2.72	3.003	2.73	3.02	1.3113	1.1536	1.3756	1.4613	0.8256	1.1883	0.8884	0.5549	0.391	0.308	0.486	0.444
451	438	ENZYME, MISC.	Acat1	ACAT1	§171	acetyl-CoA acetyltransferase, mitochondrial precursor	Q8QZT1	http://www.phosphosite.org/proteinAction.do?id=9173&showAllSites=true	45	ATPYGGVK*LEDLIVK	GATPYGGVK*LEDLIVKDGLTDVYNK	3	903.144			12740								12737								2.77								1.3756								0.347
452	439	ENZYME, MISC.	Acat1	ACAT1	§187	acetyl-CoA acetyltransferase, mitochondrial precursor	Q8QZT1	http://www.phosphosite.org/proteinAction.do?id=9173&showAllSites=true	45	GLTDVYNK*IHMGNCA	DGLTDVYNK*IHM#GNCAENTAK	3	803.698	8817	8756	8748	8800	8923	8900	9370	9319	8821	8769	8764	8813	8941	8917	9367	9320	2.545	3.198	2.945	3.009	3.046	2.598	3.178	3.297	0.6035	0.3927	0.7061	0.8119	0.5894	0.2694	1.2017	0.5342	0.241	0.376	0.311	0.255
453	440	ENZYME, MISC.	Acat1	ACAT1	§187	acetyl-CoA acetyltransferase, mitochondrial precursor	Q8QZT1	http://www.phosphosite.org/proteinAction.do?id=9173&showAllSites=true	45	GLTDVYNK*IHMGNCA	DGLTDVYNK*IHM#GNCAENTAK	3	803.698		8774								8769								2.449								0.3927								0.209
454	441	ENZYME, MISC.	Acat1	ACAT1	220	acetyl-CoA acetyltransferase, mitochondrial precursor	Q8QZT1	http://www.phosphosite.org/proteinAction.do?id=9173&showAllSites=true	45	LSSYTRSK*EAWDAGK	SK*EAWDAGKFASEITPITISVK	3	807.428	11527		11575					12060	11482		11516					12085	5.341		4.239					4.595	0.9817		1.0135					0.564	0.449		0.336
455	442	ENZYME, MISC.	Acat1	ACAT1	§227	acetyl-CoA acetyltransferase, mitochondrial precursor	Q8QZT1	http://www.phosphosite.org/proteinAction.do?id=9173&showAllSites=true	45	KEAWDAGK*FASEITP	SKEAWDAGK*FASEITPITISVK	3	807.428	11439	11463	11485	11524	11691	11621	12119		11482	11493	11516	11544	11720	11652	12164		4.675	5.132	4.787	4.411	5.402	5.206	4.753		0.983	0.8479	1.0057	1.1235	0.7557	0.7479	0.5719		0.403	0.397	0.405	0.462
456	443	ENZYME, MISC.	Acat1	ACAT1	§254	acetyl-CoA acetyltransferase, mitochondrial precursor	Q8QZT1	http://www.phosphosite.org/proteinAction.do?id=9173&showAllSites=true	45	VKEDEEYK*RVDFSKV	GKPDVVVKEDEEYK*R	3	611.651		3197					3521	3603		3810					4142	3619		1.913					2.542	2.165		0.18					0.7163	0.27		0.074
457	444	ENZYME, MISC.	Acat1	ACAT1	§335	acetyl-CoA acetyltransferase, mitochondrial precursor	Q8QZT1	http://www.phosphosite.org/proteinAction.do?id=9173&showAllSites=true	45	YAVPKVLK*YAGLKKE	VLK*YAGLK	2	467.292		5275	5278	5318	5403	5345	5728	5834		5295	5299	5348	5413	5364	5726	5844		1.747	2.165	2.262	2.634	2.218	2.221	2.554		-0.3972	-0.0769	-0.124	-0.2601	-0.2815	-0.4593	-0.6414		0.079	0.178	0.174
458	445	ENZYME, MISC.	Acat1	ACAT1	§335	acetyl-CoA acetyltransferase, mitochondrial precursor	Q8QZT1	http://www.phosphosite.org/proteinAction.do?id=9173&showAllSites=true	45	YAVPKVLK*YAGLKKE	VLK*YAGLKK	2	531.34		3448					3837	3920		3464					3835	3916		2.368					2.493	2.277		0.2498					-0.0262	-0.1844		0.105
459	446	ENZYME, MISC.	Acat2	ACAT2	§235	acetyl-CoA acetyltransferase, cytosolic	Q8CAY6	http://www.phosphosite.org/proteinAction.do?id=2812809&showAllSites=true	41	LEAMGKLK*PYFLTDG	LK*PYFLTDGTGTVTPANASGM#NDGAAAVVLM#K	3	1095.54	11049			11121	11276		11684	11611	11075			11148	11291		11691	11634	4.16			4.665	3.566		2.579	4.585	1.0996			1.8294	1.2485		1.0463	1.2786	0.48			0.501
460	447	ENZYME, MISC.	Adsl	ADSL	§295	adenylosuccinate lyase	P54822	http://www.phosphosite.org/proteinAction.do?id=9175&showAllSites=true	55	GSSAMPYK*RNPMRSE	QQIGSSAMPYK*R	2	704.356								5237								5229								2.363								1.172
461	448	ENZYME, MISC.	Ckb	CKB	307	creatine kinase B-type	Q04447	http://www.phosphosite.org/proteinAction.do?id=5407&showAllSites=true	43	PHLGKHEK*FSEVLKR	HEK*FSEVLK	2	579.811							5214	5326							5440	5570							2.523	2.378							0.4194	0.0732
462	449	ENZYME, MISC.	Ckb	CKB	313	creatine kinase B-type	Q04447	http://www.phosphosite.org/proteinAction.do?id=5407&showAllSites=true	43	EKFSEVLK*RLRLQKR	FSEVLK*R	2	460.764	4533	4449	4448	4461	4577	4510		4981	4553	4470	4466	4501	4608	4530		4990	1.811	2.209	2.408	1.809	1.867	2.048		2.456	-0.2403	-0.2305	0.179	0.0802	-0.1501	-0.0741		-0.4467	0.086	0.101	0.057	0.086
463	450	ENZYME, MISC.	Dlst	DLST	§268	dihydrolipoyllysine-residue succinyltransferase component of 2-oxoglutarate dehydrogenase complex, mitochondrial	Q9D2G2	http://www.phosphosite.org/proteinAction.do?id=18685&showAllSites=true	49	QEMRARHK*DAFLKKH	HK*DAFLK	2	450.75							3197	3274							3195	3261							2.468	2.254							-0.5902	-0.538
464	451	ENZYME, MISC.	Dlst	DLST	§273	dihydrolipoyllysine-residue succinyltransferase component of 2-oxoglutarate dehydrogenase complex, mitochondrial	Q9D2G2	http://www.phosphosite.org/proteinAction.do?id=18685&showAllSites=true	49	RHKDAFLK*KHNLKLG	HKDAFLK*K	2	514.798		1762	1719	1741	1793	1719	1983				1726	1753	1798	1735	1990			2.065	2.382	2.066	2.326	2.168	1.893			-0.1025	-0.0714	0.2601	0.0423	0.1143	-0.1366			0.021	0.225	0.257
465	452	ENZYME, MISC.	Dot1l	DOT1L	88	histone-lysine N-methyltransferase, H3 lysine-79 specific	Q571B8	http://www.phosphosite.org/proteinAction.do?id=10968&showAllSites=true	165	PEVDHQLK*ERFANMK	DHQLK*ER	2	484.251		1507																2.099								-0.6133								0.016
466	453	ENZYME, MISC.	Echs1	ECHS1	§101	enoyl-CoA hydratase, mitochondrial precursor	Q8BH95	http://www.phosphosite.org/proteinAction.do?id=15720&showAllSites=true	31	FAAGADIK*EMQNRTF	AFAAGADIK*EM#QNR	2	790.38			4890					5404			4925					5383			3.707					3.909			0.5875					-0.4064			0.44
467	454	ENZYME, MISC.	Ehmt1	EHMT1	299, 300, 301	histone-lysine N-methyltransferase EHMT1 isoform 1	Q5DW34	http://www.phosphosite.org/proteinAction.do?id=18139&showAllSites=true	142	GTYSLVPK*KKTKVLK, TYSLVPKK*KTKVLKQ, YSLVPKKK*TKVLKQR	SLVPK*K*K*TK	2	577.861								5475																2.405								-0.523
468	455	ENZYME, MISC.	Hadh	HADHSC	§241	hydroxyacyl-coenzyme A dehydrogenase, mitochondrial precursor	Q61425	http://www.phosphosite.org/proteinAction.do?id=10555&showAllSites=true	34	HERGDASK*EDIDTAM	GDASK*EDIDTAMK	2	711.824			4722	4762			5142	5248			4716	4754			5132	5240			3.531	2.897			3.447	3.826			0.0803	1.1789			0.4282	0.5203			0.372	0.357
469	456	ENZYME, MISC.	Hadha	HADHA	§353	trifunctional enzyme subunit alpha, mitochondrial precursor	Q8BMS1	http://www.phosphosite.org/proteinAction.do?id=11619&showAllSites=true	83	QVLCKKNK*FGAPQKN	NK*FGAPQK	2	466.253	2756			2723			3060	3151				2718				3143	1.947			2.343			2.156	2.455	-1.0726			-0.3801			0.1577	-0.6668	0.063			0.039
470	457	ENZYME, MISC.	Ppat	ATASE	60	phosphoribosyl pyrophosphate amidotransferase	Q3TKC5	http://www.phosphosite.org/proteinAction.do?id=9664&showAllSites=true	53	SDGSAVPK*FRVHKGM	GQESAGIVTSDGSAVPK*FR	2	974.492	7510			7499				7996	7501			7493					2.523			3.97				1.804	1.2082			1.509				0.1558	0.365			0.501
471	458	ENZYME, MISC.	Ppat	ATASE	§81	phosphoribosyl pyrophosphate amidotransferase	Q3TKC5	http://www.phosphosite.org/proteinAction.do?id=9664&showAllSites=true	53	FTEDNLKK*LYDSNLG	K*LYDSNLGIGHTR	3	505.935	5374			5327				5800	5371			5502				5801	2.291			3.108				2.249	0.6828			0.4822				0.6564	0.02			0.167
472	459	ENZYME, MISC.	Whsc1l1	WHSC1L1	§790	histone-lysine N-methyltransferase NSD3 isoform 1	Q6P2L6	http://www.phosphosite.org/proteinAction.do?id=1169911&showAllSites=true	161	PTAIFESK*GFRCPQH	KFPTAIFESK*GFR	3	523.952	9307	9325	9340	9287	9437	9469			9316	9242	9259	9286	9458	9423			3.21	3.537	3.783	3.266	3.42	3.304			-0.0172	0.0727	-0.107	0.1128	0.0796	-0.0802			0.351	0.338	0.379	0.361
473	460	ENZYME, MISC.	Whsc1l1	WHSC1L1	§790	histone-lysine N-methyltransferase NSD3 isoform 1	Q6P2L6	http://www.phosphosite.org/proteinAction.do?id=1169911&showAllSites=true	161	PTAIFESK*GFRCPQH	KFPTAIFESK*GFR	3	523.952		9232	9249	9391		9369				9242	9259	9286		9423				3.403	3.37	2.462		2.444				0.0937	-0.07	0.1593		0.0109				0.344	0.381	0.27
474	Endoplasmic reticulum or golgi
475	461	Endoplasmic reticulum or golgi	Cat	catalase	§449	catalase	P24270	http://www.phosphosite.org/proteinAction.do?id=4045&showAllSites=true	60	QVRTFYTK*VLNEEER	TFYTK*VLNEEER	2	785.891	8673		8630	8644		8758			8667		8599	8648		8763			3.495		2.667	3.526		4.363			0.8239		0.82	0.7099		0.9034			0.383		0.321	0.348
476	462	Endoplasmic reticulum or golgi	Cat	catalase	§499	catalase	P24270	http://www.phosphosite.org/proteinAction.do?id=4045&showAllSites=true	60	RIQALLDK*YNAEKPK	IQALLDK*YNAEKPK	3	558.314				6619			6995					6602			6991					2.563			2.222					0.4227			0.3199					0.183
477	463	Endoplasmic reticulum or golgi	Cyb5r4	CYB5R4	449	cytochrome b5 reductase 4	Q3TDX8	http://www.phosphosite.org/proteinAction.do?id=2464747&showAllSites=true	60	IWRCQLEK*LALREKR	CQLEK*LALR	2	586.826						7364								7355								2.034								0.2231
478	Enzyme, misc.
479	464	Enzyme, misc.	Acaca; Acacb	ACC1; ACC2	519; 653	acetyl-CoA carboxylase 1	Q5SWU9; Q6JIZ0	http://www.phosphosite.org/proteinAction.do?id=5670&showAllSites=true	265; 276	ENPDEGFK*PSSGTVQ; ENPDEGFK*PSSGTVQ	ITSENPDEGFK*PSSGTVQELNFR	3	865.417	9364		9344	9358	9517		9943		9360		9347	9374	9524		9917		3.288		4.07	3.865	3.935		3.987		0.5128		0.815	0.6543	0.6847		0.1782		0.378		0.335	0.452
480	465	Enzyme, misc.	Acox1; Acox1	ACOX1; ACOX1 iso3	§437; §437	peroxisomal acyl-coenzyme A oxidase 1	Q9R0H0; Q8BW35	http://www.phosphosite.org/proteinAction.do?id=10613&showAllSites=true	75; 56	QTARFLMK*IYDQVQS; QTARFLMK*IYDQVQS	FLMK*IYDQVQSGK	2	799.916				9516			10119								10137					2.74			2.968					0.5473			-0.0694					0.239
481	466	Enzyme, misc.	Acox1; Acox1	ACOX1; ACOX1 iso3	§437; §437	peroxisomal acyl-coenzyme A oxidase 1	Q9R0H0; Q8BW35	http://www.phosphosite.org/proteinAction.do?id=10613&showAllSites=true	75; 56	QTARFLMK*IYDQVQS; QTARFLMK*IYDQVQS	FLM#K*IYDQVQSGK	2	807.913	8221	8171	7967	8008	8144	8309	8750	8559	8238	7988	8181	8021	8138	8312	8751	8550	3.96	3.397	3.937	3.654	4.452	3.974	3.867	3.87	0.3669	0.1532	0.3811	0.552	0.2715	0.4734	0.1278	0.178	0.405	0.41	0.43	0.436
482	467	Enzyme, misc.	Acox1; Acox1	ACOX1; ACOX1 iso3	§437; §437	peroxisomal acyl-coenzyme A oxidase 1	Q9R0H0; Q8BW35	http://www.phosphosite.org/proteinAction.do?id=10613&showAllSites=true	75; 56	QTARFLMK*IYDQVQS; QTARFLMK*IYDQVQS	FLM#K*IYDQVQSGK	2	807.913	8026	7992	8165	8214	8344	8101		8733	8238	7988		8021	8138	8312		8550	3.454	3.392	1.992	3.485	4.253	3.812		3.005	0.5365	0.7074	0.4715	0.2151	0.178	0.7719		0.0622	0.373	0.453	0.103	0.447
483	468	Enzyme, misc.	Acox1	ACOX1	§655	peroxisomal acyl-coenzyme A oxidase 1	Q9R0H0	http://www.phosphosite.org/proteinAction.do?id=10613&showAllSites=true	75	ESYYKHLK*PLQSKL-	HLK*PLQSK	2	496.798	1970								1971								1.889								-0.616								0.155
484	469	Enzyme, misc.	Akr1a4	AKR1A1	§127	alcohol dehydrogenase [NADP+]	Q9JII6	http://www.phosphosite.org/proteinAction.do?id=12602&showAllSites=true	37	RGDNPFPK*NADGTVR	GDNPFPK*NADGTVR	2	765.371	5333	5247	5229	5278	5374	5319	5678	5756	5327	5262	5255	5282	5380	5309	5671	5757	3.029	2.752	2.588	2.533	3.343	2.975	2.406	2.922	0.3085	0.5739	0.687	1.1636	-0.0275	0.7903	-0.1726	0.4915	0.38	0.276	0.294	0.211
485	470	Enzyme, misc.	Aldh1l1	ALDH1L1	§882	aldehyde dehydrogenase family 1 member L1	Q8R0Y6	http://www.phosphosite.org/proteinAction.do?id=16592&showAllSites=true	99	FKQSGFGK*DLGEAAL	QSGFGK*DLGEAALNEYLR	2	1005.5	11937		11996		12210	12132			11955		12011		12226	12136			2.899		3.036		3.082	3.042			0.3271		0.4967		-0.3167	-0.267			0.532		0.562
486	471	Enzyme, misc.	Aldh1l1	ALDH1L1	§882	aldehyde dehydrogenase family 1 member L1	Q8R0Y6	http://www.phosphosite.org/proteinAction.do?id=16592&showAllSites=true	99	FKQSGFGK*DLGEAAL	QSGFGK*DLGEAALNEYLR	3	670.669		11970		12045		12128				11988				12147				2.732		1.968		3.719				0.5246		0.5281		0.334				0.254		0.057
487	472	Enzyme, misc.	Aldh1l2	ALDH1L2	177	aldehyde dehydrogenase family 1 member L2, mitochondrial	Q8K009	http://www.phosphosite.org/proteinAction.do?id=21096&showAllSites=true	102	LQRSCDVK*PNDTVDS	SCDVK*PNDTVDSLYNR	2	962.939	6619								6622								2.965								-0.0387								0.502
488	473	Enzyme, misc.	Alox12b	ALOX12B	191	arachidonate 12-lipoxygenase, 12R-type	O70582	http://www.phosphosite.org/proteinAction.do?id=1284654&showAllSites=true	81	FPILINIK*ATRFLNS	NPNRPEWDGYIPGFPILINIK*ATRFL	4	771.667							14755																2.852								2.1061
489	474	Enzyme, misc.	Atat1; ATAT1 iso2	ATAT1; ATAT1 iso2	162; 162	alpha-tubulin N-acetyltransferase isoform 1	Q8K341; Q8K341-2	http://www.phosphosite.org/proteinAction.do?id=21502&showAllSites=true	47; 45	AIDRPSPK*LLKFLNK; AIDRPSPK*LLKFLNK	AIDRPSPK*LLK	3	427.263				4563	4664	4591														2.017	2.044	2.126						0.7488	0.68	0.6284						0.189
490	475	Enzyme, misc.	Atat1; ATAT1 iso2	ATAT1; ATAT1 iso2	162; 162	alpha-tubulin N-acetyltransferase isoform 1	Q8K341; Q8K341-2	http://www.phosphosite.org/proteinAction.do?id=21502&showAllSites=true	47; 45	AIDRPSPK*LLKFLNK; AIDRPSPK*LLKFLNK	ERVEPHQLAIDRPSPK*LLK	4	567.826						5576	5882								5858							2.906	2.877							0.1847	0.2539
491	476	Enzyme, misc.	Atat1; ATAT1 iso2	ATAT1; ATAT1 iso2	162; 162	alpha-tubulin N-acetyltransferase isoform 1	Q8K341; Q8K341-2	http://www.phosphosite.org/proteinAction.do?id=21502&showAllSites=true	47; 45	AIDRPSPK*LLKFLNK; AIDRPSPK*LLKFLNK	VEPHQLAIDRPSPK*LLK	3	661.718						6187								6167								2.579								0.177
492	477	Enzyme, misc.	Atat1; ATAT1 iso2	ATAT1; ATAT1 iso2	§233; §210	alpha-tubulin N-acetyltransferase isoform 1	Q8K341; Q8K341-2	http://www.phosphosite.org/proteinAction.do?id=21502&showAllSites=true	47; 45	KRAEGDIK*PYSSSDR; KRAEGDIK*PYSSSDR	AEGDIK*PYSSSDREFLK	3	661.994	6553	6508	6485	6529		6600		6996	6567	6514	6487	6525		6618		7010	2.103	2.156	2.517	2.742		2.878		2.414	0.5332	0.4284	1.0554	0.4747		0.9783		0.2227	0.108	0.084	0.233	0.235
493	478	Enzyme, misc.	Atat1; ATAT1 iso2	ATAT1; ATAT1 iso2	§233; §210	alpha-tubulin N-acetyltransferase isoform 1	Q8K341; Q8K341-2	http://www.phosphosite.org/proteinAction.do?id=21502&showAllSites=true	47; 45	KRAEGDIK*PYSSSDR; KRAEGDIK*PYSSSDR	RAEGDIK*PYSSSDR	3	541.597		2773		2797	2872		3091			2781		2806	2866		3094			2.309		1.89	2.386		2.764			0.2107		0.2291	0.5077		-0.0087			0.147		0.015
494	479	Enzyme, misc.	Atat1; ATAT1 iso2	ATAT1; ATAT1 iso2	§233; §210	alpha-tubulin N-acetyltransferase isoform 1	Q8K341; Q8K341-2	http://www.phosphosite.org/proteinAction.do?id=21502&showAllSites=true	47; 45	KRAEGDIK*PYSSSDR; KRAEGDIK*PYSSSDR	RAEGDIK*PYSSSDREFLK	3	714.027		5439	5435	5486	5548	5512				5436	5431	5480	5523	5518				4.27	4.013	4.307	3.607	3.768				0.7307	0.7391	0.6279	0.6863	0.6307				0.299	0.283	0.352
495	480	Enzyme, misc.	Cmas	CMAS	267	N-acylneuraminate cytidylyltransferase	Q99KK2	http://www.phosphosite.org/proteinAction.do?id=9538&showAllSites=true	48	LRFGYFGK*EKLKEIK	FGYFGK*EK	2	509.256					6395																1.42								1.4695
496	481	Enzyme, misc.	Cmas	CMAS	404	N-acylneuraminate cytidylyltransferase	Q99KK2	http://www.phosphosite.org/proteinAction.do?id=9538&showAllSites=true	48	KAVGYICK*CSGGRGA	AVGYICK*CSGGR	2	685.321	4100			4049			4415		4102			4028			4428		3.096			2.94			3.404		0.4482			0.5308			-0.0008		0.467			0.408
497	482	Enzyme, misc.	Cwc27	SDCCAG10	291, 292, 299	peptidyl-prolyl cis-trans isomerase CWC27 homolog	Q3TKY6	http://www.phosphosite.org/proteinAction.do?id=21243&showAllSites=true	54	ERIAKRLK*KDASASV, RIAKRLKK*DASASVK, KDASASVK*SAGDGEK	IAKRLK*K*DASASVK*	3	547.661							4800																1.547								0.8968
498	483	Enzyme, misc.	Dcps	DCPS	§141	scavenger mRNA-decapping enzyme DcpS	Q9DAR7	http://www.phosphosite.org/proteinAction.do?id=22956&showAllSites=true	39	ATEKHLQK*YMRQDLR	HLQK*YMR	2	509.269	2502		2374	2431	2549	2469		2813	2466		2395	2443	2525	2445		2840	2.006		1.96	2.106	2.132	2.195		2.065	-0.4416		-0.4033	-0.3817	-0.4465	-0.4338		-0.764	0.017		0.153	0.103
499	484	Enzyme, misc.	Dcps	DCPS	§141	scavenger mRNA-decapping enzyme DcpS	Q9DAR7	http://www.phosphosite.org/proteinAction.do?id=22956&showAllSites=true	39	ATEKHLQK*YMRQDLR	HLQK*YM#R	2	517.266	1690			1669	1704		1905	1923	1697			1643	1710		1891	1933	2.069			1.855	2.086		1.98	2.142	-0.1006			0.6444	1.5346		0.299	-0.3193	0.012			0.06
500	485	Enzyme, misc.	Ddx59	DDX59	360	probable ATP-dependent RNA helicase DDX59	Q9DBN9	http://www.phosphosite.org/proteinAction.do?id=22643&showAllSites=true	68	DEADTMLK*MGFQQQV	EADTMLK*	2	425.205		2644																1.835								1.5613								0.125
501	486	Enzyme, misc.	Dpysl3	CRMP-4	157	dihydropyrimidinase-related protein 3 isoform 1	Q62188	http://www.phosphosite.org/proteinAction.do?id=6606&showAllSites=true	62	QEVQSLSK*EKGVNSF	QEVQSLSK*EK	2	609.322	2701	2655	2623	2669	2749	2670			2708	2660	2625	2674	2745	2665			2.206	2.281	2.074	2.519	2.372	2.204			-0.1485	-0.1706	-0.0401	0.2819	0.0724	0.3525			0.143	0.103	0.158	0.089
502	487	Enzyme, misc.	Epc1	EPC1	340, 343	enhancer of polycomb homolog 1 isoform 1	Q8C9X6	http://www.phosphosite.org/proteinAction.do?id=18997&showAllSites=true	90	RPKRKYEK*KPKVLPP, RKYEKKPK*VLPPSAA	YEK*KPK*VLPPSAAAPQQQSPAALPGFSAK	5	618.938	1362																2.234								-0.2593								0.024
503	488	Enzyme, misc.	Esd	esterase D	§200	S-formylglutathione hydrolase	Q9R0P3	http://www.phosphosite.org/proteinAction.do?id=11127&showAllSites=true	31	GPDESKWK*AYDATCL	WK*AYDATCLVK	2	698.85	8241	8206	8195	8237	8348		8761		8260	8230	8203	8263	8369		8784		3.013	2.886	3.383	2.787	3.011		3.321		-0.2001	-0.5796	-0.1858	-0.0483	-0.3197		0.4235		0.188	0.2	0.278	0.151
504	489	Enzyme, misc.	Fasn	FASN	§1764	fatty acid synthase	P19096	http://www.phosphosite.org/proteinAction.do?id=7967&showAllSites=true	272	GRFLEIGK*FDLSNNH	FLEIGK*FDLSNNHPLGMAIFLK	3	849.454		14428					15176	15094							15178	15099		1.911					2.362	3.054		1.4065					0.3643	1.2797		0.02
505	490	Enzyme, misc.	Fasn	FASN	§1764	fatty acid synthase	P19096	http://www.phosphosite.org/proteinAction.do?id=7967&showAllSites=true	272	GRFLEIGK*FDLSNNH	FLEIGK*FDLSNNHPLGM#AIFLK	3	854.786	13082	13112	13137	13159	13330	13252	13821	13774	13110	13132	13155	13183	13348	13291	13847	13801	3.268	4.434	4.45	3.385	2.641	3.411	3.64	3.66	1.4092	1.5009	1.4416	1.4631	0.7052	0.9752	0.8789	1.0178	0.373	0.377	0.345	0.336
506	491	Enzyme, misc.	Fasn	FASN	2375	fatty acid synthase	P19096	http://www.phosphosite.org/proteinAction.do?id=7967&showAllSites=true	272	FLDVEHSK*VLEALLP	QFLDVEHSK*VLEALLPLK	3	707.737			13921		14068	14031		14602			13936		14074	14061					3.078		3.794	3.343		2.29			0.6816		0.9706	1.3138		0.6081			0.124
507	492	Enzyme, misc.	Fasn	FASN	2375	fatty acid synthase	P19096	http://www.phosphosite.org/proteinAction.do?id=7967&showAllSites=true	272	FLDVEHSK*VLEALLP	QFLDVEHSK*VLEALLPLK	3	707.737			13913								13936								2.867								0.6816								0.013
508	493	Enzyme, misc.	Fasn	FASN	2427	fatty acid synthase	P19096	http://www.phosphosite.org/proteinAction.do?id=7967&showAllSites=true	272	LRAADQYK*PKAKYHG	AADQYK*PK	2	481.751		2223		2235	2310					2211		2212	2294					1.941		2.124	1.711					0.4017		0.5046	0.9087					0.147		0.197
509	494	Enzyme, misc.	Fasn	FASN	§59	fatty acid synthase	P19096	http://www.phosphosite.org/proteinAction.do?id=7967&showAllSites=true	272	GKLKDLSK*FDASFFG	LKDLSK*FDASFFGVHPK	4	495.266						9783								9764								3.262								0.1438
510	495	Enzyme, misc.	Fasn	FASN	§673	fatty acid synthase	P19096	http://www.phosphosite.org/proteinAction.do?id=7967&showAllSites=true	272	KQEGVFAK*EVRTGGL	QEGVFAK*EVR	2	602.82	5511	5423			5544	5506			5536	5425			5534	5507			2.421	2.165			2.268	2.047			0.1844	-0.0596			0.5298	-0.5021			0.181	0.202
511	496	Enzyme, misc.	Fasn	FASN	993	fatty acid synthase	P19096	http://www.phosphosite.org/proteinAction.do?id=7967&showAllSites=true	272	LTQGEVYK*ELRLRGY	LTQGEVYK*ELR	2	689.372	6684	6585	6583	6634	6739	6701	7063	7171	6688	6602	6597	6646	6752	6717	7068	7175	3.044	3.026	2.456	2.632	2.432	2.793	2.854	2.635	0.2198	0.5217	0.5021	1.0581	0.6517	0.317	0.4622	-0.0335	0.33	0.314	0.361	0.321
512	497	Enzyme, misc.	Fkbp1a	FKBP12	48	peptidyl-prolyl cis-trans isomerase FKBP1A	P26883	http://www.phosphosite.org/proteinAction.do?id=19749&showAllSites=true	12	RDRNKPFK*FTLGKQE	NKPFK*FTLGK	3	407.904	6604	6553		6595	6674	6622		7138					6697	6651		7098	1.996	2.093		2.166	2.605	2.518		2.119	0.4812	0.8544		0.9142	0.7226	0.7668		0.229	0.019	0.039		0.046
513	498	Enzyme, misc.	Fkbp1a	FKBP12	§53	peptidyl-prolyl cis-trans isomerase FKBP1A	P26883	http://www.phosphosite.org/proteinAction.do?id=19749&showAllSites=true	12	PFKFTLGK*QEVIRGW	FTLGK*QEVIR	2	616.854	7643	7612	7605		7740	7695	8108		7644	7614	7598		7742	7707	8113		2.26	2.418	2.651		2.04	2.394	1.877		0.2746	0.4547	0.6762		-0.0101	0.6997	0.4929		0.212	0.182	0.233
514	499	Enzyme, misc.	G6pd2	G6PD-2	407, 427, 429	glucose-6-phosphate 1-dehydrogenase 2	P97324	http://www.phosphosite.org/proteinAction.do?id=4378&showAllSites=true	59	VYTTMMTK*KPGMFFN, LDLTYGNK*YKNVKLP, LTYGNKYK*NVKLPGA	K*KPGMFFNPEESELDLTYGNK*YK*	3	954.462	8862																2.948								2.2003								0.204
515	500	Enzyme, misc.	Gapdh	GAPDH	§192	glyceraldehyde-3-phosphate dehydrogenase	P16858	http://www.phosphosite.org/proteinAction.do?id=4368&showAllSites=true	36	TVDGPSGK*LWRDGRG	TVDGPSGK*LWR	2	629.333	6697	6620	6625	6684	6773	6736	7130	7226	6732	6668	6663	6723	6829	6783	7178	7263	2.916	2.73	2.782	3.094	2.598	2.7	3.25	3.197	0.0462	0.2609	0.365	0.2958	0.2108	0.1273	-0.019	-0.2313	0.29	0.244	0.245	0.303
516	501	Enzyme, misc.	Gapdh	GAPDH	§192	glyceraldehyde-3-phosphate dehydrogenase	P16858	http://www.phosphosite.org/proteinAction.do?id=4368&showAllSites=true	36	TVDGPSGK*LWRDGRG	TVDGPSGK*LWR	2	629.333	6801								6732								2.334								0.0438								0.283
517	502	Enzyme, misc.	Gapdh	GAPDH	§249	glyceraldehyde-3-phosphate dehydrogenase	P16858	http://www.phosphosite.org/proteinAction.do?id=4368&showAllSites=true	36	DLTCRLEK*PAKYDDI	LEK*PAKYDDIK	3	454.582								4054																2.034								-0.2153
518	503	Enzyme, misc.	Gapdh	GAPDH	§252	glyceraldehyde-3-phosphate dehydrogenase	P16858	http://www.phosphosite.org/proteinAction.do?id=4368&showAllSites=true	36	CRLEKPAK*YDDIKKV	LEKPAK*YDDIK	2	681.369	3689				3735		4009	4078	3693				3730		3999	4081	2.482				2.687		2.215	2.764	-0.0391				-0.2946		0.2305	-0.5281	0.085
519	504	Enzyme, misc.	Gapdh	GAPDH	§252	glyceraldehyde-3-phosphate dehydrogenase	P16858	http://www.phosphosite.org/proteinAction.do?id=4368&showAllSites=true	36	CRLEKPAK*YDDIKKV	LEKPAK*YDDIK	3	454.582	3683	3600	3650			3636			3693		3613			3670			2.791	1.874	3.043			3.051			-0.3468	-0.2057	-0.0787			0.1247			0.193	0.124	0.228
520	505	Enzyme, misc.	Gapdh	GAPDH	§252	glyceraldehyde-3-phosphate dehydrogenase	P16858	http://www.phosphosite.org/proteinAction.do?id=4368&showAllSites=true	36	CRLEKPAK*YDDIKKV	LEKPAK*YDDIK	3	454.582			3611			3696					3613			3670					2.526			2.638					-0.0787			0.0975					0.193
521	506	Enzyme, misc.	Gapdh	GAPDH	§252	glyceraldehyde-3-phosphate dehydrogenase	P16858	http://www.phosphosite.org/proteinAction.do?id=4368&showAllSites=true	36	CRLEKPAK*YDDIKKV	LEKPAK*YDDIKK	2	745.417	2703	2667	2657	2672	2744	2673	2981	3032	2697	2660	2647	2674	2745	2665	2973	3045	2.211	2.997	2.205	2.469	2.707	2.044	2.875	2.502	0.6939	0.2173	0.0005	0.8174	1.696	1.8893	0.7973	0.5019	0.097	0.094	0.062	0.236
522	507	Enzyme, misc.	Gapdh	GAPDH	§252	glyceraldehyde-3-phosphate dehydrogenase	P16858	http://www.phosphosite.org/proteinAction.do?id=4368&showAllSites=true	36	CRLEKPAK*YDDIKKV	LEKPAK*YDDIKK	3	497.28	2711	2685	2627	2667	2747	2666	2947	3014	2708	2649	2614	2674	2756	2676	2962	3045	3.679	3.85	3.366	3.641	3.904	3.656	3.392	2.778	-0.9835	-0.2941	-0.9096	-0.4378	-0.378	-0.4364	-0.8566	-0.6687	0.256	0.225	0.229	0.198
523	508	Enzyme, misc.	Gapdh	GAPDH	§252	glyceraldehyde-3-phosphate dehydrogenase	P16858	http://www.phosphosite.org/proteinAction.do?id=4368&showAllSites=true	36	CRLEKPAK*YDDIKKV	LEKPAK*YDDIKK	3	497.28							2964								2962								2.929								-0.8405
524	509	Enzyme, misc.	Gapdh	GAPDH	§59	glyceraldehyde-3-phosphate dehydrogenase	P16858	http://www.phosphosite.org/proteinAction.do?id=4368&showAllSites=true	36	GKFNGTVK*AENGKLV	FNGTVK*AENGK	2	603.809	2479	2441	2401		2533				2466	2428	2395		2525				2.519	2.66	2.785		2.837				-0.4503	-0.394	-0.6783		-0.292				0.104	0.161	0.167
525	510	Enzyme, misc.	Gapdh	GAPDH	§59	glyceraldehyde-3-phosphate dehydrogenase	P16858	http://www.phosphosite.org/proteinAction.do?id=4368&showAllSites=true	36	GKFNGTVK*AENGKLV	FNGTVK*AENGK	2	603.809					2539								2525								2.798								-0.292
526	511	Enzyme, misc.	Gapdh	GAPDH	§70	glyceraldehyde-3-phosphate dehydrogenase	P16858	http://www.phosphosite.org/proteinAction.do?id=4368&showAllSites=true	36	GKLVINGK*PITIFQE	LVINGK*PITIFQERDPTNIK	3	780.109		10283	10335		10515		10899			10300	10348				10896			3.247	2.666		2.399		2.64			0.2512	0.5211		0.3368		0.7285			0.162	0.185
527	512	Enzyme, misc.	Gapdh	GAPDH	§70	glyceraldehyde-3-phosphate dehydrogenase	P16858	http://www.phosphosite.org/proteinAction.do?id=4368&showAllSites=true	36	GKLVINGK*PITIFQE	LVINGK*PITIFQERDPTNIK	3	780.109			10341																2.294								0.5211								0.036
528	513	Enzyme, misc.	Gsta3	GSTA3	123	glutathione S-transferase A3	P30115	http://www.phosphosite.org/proteinAction.do?id=19791&showAllSites=true	25	EKEASLAK*IKEQTRN	ASLAK*IK	2	386.75				4791																1.743								0.131								0.009
529	514	Enzyme, misc.	Hmgcs1	HMGCS1	206	hydroxymethylglutaryl-CoA synthase, cytoplasmic	Q8JZK9	http://www.phosphosite.org/proteinAction.do?id=9215&showAllSites=true	58	QHAYDFYK*PDMLSEY	GTHM#QHAYDFYK*PDM#LSEYPVVDGK	4	751.339	8445	8424	8418	8366		8461			8403	8384	8357	8406		8510			3.721	3.517	3.931	3.914		3.093			0.4916	0.86	1.2624	1.2347		0.9223			0.177	0.311	0.251	0.3
530	515	Enzyme, misc.	Hmgcs1	HMGCS1	206	hydroxymethylglutaryl-CoA synthase, cytoplasmic	Q8JZK9	http://www.phosphosite.org/proteinAction.do?id=9215&showAllSites=true	58	QHAYDFYK*PDMLSEY	GTHM#QHAYDFYK*PDM#LSEYPVVDGK	4	751.339			8321	8454							8357	8406							3.613	3.643							1.1804	1.0589							0.302	0.247
531	516	Enzyme, misc.	Hsd17b1	HSD17B1	131	estradiol 17-beta-dehydrogenase 1	P51656	http://www.phosphosite.org/proteinAction.do?id=7579909&showAllSites=true	37	QAFLPDMK*RRHSGRV	M#LQAFLPDMK*R	2	704.36							8160								8168								2.466								0.3262
532	517	Enzyme, misc.	Idh1	IDH1	115	isocitrate dehydrogenase [NADP] cytoplasmic	O88844	http://www.phosphosite.org/proteinAction.do?id=10631&showAllSites=true	47	FREAIICK*NIPRLVT	EAIICK*NIPR	2	628.345	6407	6365	6360	6402	6498	6461	6803	6874	6413	6371	6366	6404	6510	6475	6804	6889	1.989	2.71	2.019	2.515	2.196	2.095	2.592	2.237	0.3503	0.9579	0.9165	0.6648	0.7604	0.3909	0.5286	0.1902	0.021	0.28	0.116	0.269
533	518	Enzyme, misc.	Idh1	IDH1	243	isocitrate dehydrogenase [NADP] cytoplasmic	O88844	http://www.phosphosite.org/proteinAction.do?id=10631&showAllSites=true	47	KSQFEAQK*ICYEHRL	SQFEAQK*ICYEHR	2	869.404	5092	4983			5097				5063	4987			5109				3.156	3.992			3.584				0.1302	0.6153			0.0444				0.43	0.481
534	519	Enzyme, misc.	Idh1	IDH1	243	isocitrate dehydrogenase [NADP] cytoplasmic	O88844	http://www.phosphosite.org/proteinAction.do?id=10631&showAllSites=true	47	KSQFEAQK*ICYEHRL	SQFEAQK*ICYEHR	3	579.939		4990	4970	5008	5121	5046	5366	5495		4987		5007	5109	5034	5374	5493		2.226	1.742	1.951	2.495	1.691	1.704	1.955		-0.2249	-0.2191	-0.1115	-0.3388	-0.1598	-0.1944	-0.4504		0.222	0	0.183
535	520	Enzyme, misc.	Idh1	IDH1	66	isocitrate dehydrogenase [NADP] cytoplasmic	O88844	http://www.phosphosite.org/proteinAction.do?id=10631&showAllSites=true	47	DAAEAIKK*YNVGVKC	K*YNVGVK	2	425.245	2810	2752		2764			3109		2829	2759		2773			3105		2.317	2.522		2.588			2.54		0.0961	0.8506		0.5575			1.092		0.095	0.187		0.101
536	521	Enzyme, misc.	Idh1	IDH1	§81	isocitrate dehydrogenase [NADP] cytoplasmic	O88844	http://www.phosphosite.org/proteinAction.do?id=10631&showAllSites=true	47	ATITPDEK*RVEEFKL	CATITPDEK*R	2	616.801	2821	2772	2753	2778	2862	2799	3099	3172	2840	2792	2768	2806	2877	2807	3116	3176	2.666	2.46	2.219	2.694	2.506	2.528	2.424	2.449	-0.3032	-0.3617	0.0975	0.4261	0.1649	0.2314	-0.1288	-0.2951	0.174	0.177	0.215	0.221
537	522	Enzyme, misc.	Idi1	IDI1	§176	isopentenyl-diphosphate Delta-isomerase 1	P58044	http://www.phosphosite.org/proteinAction.do?id=2473669&showAllSites=true	26	KSYCYVSK*EEVREIL	SYCYVSK*EEVR	2	731.338	5334								5316								3.612								0.1567								0.284
538	523	Enzyme, misc.	Mdh1	MDH1	§118	malate dehydrogenase, cytoplasmic	P14152	http://www.phosphosite.org/proteinAction.do?id=14289&showAllSites=true	37	SQGTALEK*YAKKSVK	SQGTALEK*YAK	2	619.325	4555	4462	4447	4469	4598	4520	4869	4971	4564	4448	4444	4479	4586	4530	4879	4990	3.216	3.528	3.772	3.377	3.297	3.631	3.353	3.317	0.0944	0.0661	0.298	0.2431	0.0718	0.1041	0.1453	0.2116	0.408	0.453	0.435	0.429
539	524	Enzyme, misc.	Mgea5	OGA	844, 850	bifunctional protein NCOAT	Q9EQQ9	http://www.phosphosite.org/proteinAction.do?id=6710&showAllSites=true	103	ANFPSLIK*MDIHKKV, IKMDIHKK*VTDPSVA	IK*M#DIHKK*VTDPSVAK	3	637.352		2390																2.541								1.4994								0.062
540	525	Enzyme, misc.	Mobkl2c	MOBKL2C	39	mps one binder kinase activator-like 2C	Q8BJG4	http://www.phosphosite.org/proteinAction.do?id=9830817&showAllSites=true	26	KKAQASLK*SGLDLRS	QASLK*SGLDLR	3	410.567	2387																2.313								0.6053								0.011
541	526	Enzyme, misc.	Myst4	MYST4	§856, §860, §862	histone acetyltransferase MYST4	Q8BRB7	http://www.phosphosite.org/proteinAction.do?id=22836&showAllSites=true	209	SSRQSSAK*VQSKNKY, SSAKVQSK*NKYLHSP, AKVQSKNK*YLHSPER	QSSAK*VQSK*NK*YLHSPER	3	738.382	5192						5460	5578								5570	2.432						2.392	2.856	0.6907						-0.4516	-0.114	0.009
542	527	Enzyme, misc.	Naa10	NAA10	§136	N-alpha-acetyltransferase 10, NatA catalytic subunit isoform 2	Q9QY36	http://www.phosphosite.org/proteinAction.do?id=7998&showAllSites=true	27	QISEVEPK*YYADGED	AALHLYSNTLNFQISEVEPK*YYADGEDAYAM#KR	4	967.215				11026			11621					11049			11658					2.791			3.676					1.0636			0.8209					0.192
543	528	Enzyme, misc.	Naa10	NAA10	148	N-alpha-acetyltransferase 10, NatA catalytic subunit isoform 2	Q9QY36	http://www.phosphosite.org/proteinAction.do?id=7998&showAllSites=true	27	GEDAYAMK*RDLTQMA	AALHLYSNTLNFQISEVEPKYYADGEDAYAM#K*R	4	967.215	10963																3.029								0.793								0.069
544	529	Enzyme, misc.	Naa11	NAA11	§136	N-alpha-acetyltransferase 11, NatA catalytic subunit	Q3UX61	http://www.phosphosite.org/proteinAction.do?id=5117611&showAllSites=true	25	QVSEVEPK*YYADGED	AALHLYSNTLNFQVSEVEPK*YYADGEDAYAM#KR	4	963.711		10506	10530	10536	10692					10465	10535	10539						3.198	3.723	3.083	2.355					2.0807	1.136	1.0376	1.4987					0.047	0.307	0.188
545	530	Enzyme, misc.	Naa30	NAA30	§235	N-alpha-acetyltransferase 30, NatC catalytic subunit	Q8CES0	http://www.phosphosite.org/proteinAction.do?id=12251&showAllSites=true	39	DIMRLITK*DLSEPYS	LITK*DLSEPYSIYTYR	2	1002.52	10420	10400	10440	10453	10611	10566	11049	11010	10449	10432	10469	10473	10642	10600	11072		3.743	3.698	3.641	3.759	3.775	4.046	3.767	1.176	1.0568	1.1516	1.3277	1.189	0.9355	1.2494	0.9156	0.6391	0.524	0.538	0.489	0.536
546	531	Enzyme, misc.	Naa30	NAA30	§235	N-alpha-acetyltransferase 30, NatC catalytic subunit	Q8CES0	http://www.phosphosite.org/proteinAction.do?id=12251&showAllSites=true	39	DIMRLITK*DLSEPYS	LITK*DLSEPYSIYTYR	3	668.682							11074	11016							11083	11047							3.658	3.272							0.4929	0.3188
547	532	Enzyme, misc.	Naa50; Naa50	NAA50; NAA50 iso4	§34; §40	N-alpha-acetyltransferase 50, NatE catalytic subunit	Q6PGB6; Q6PGB6-4	http://www.phosphosite.org/proteinAction.do?id=4323&showAllSites=true	19; 20	FPVSYNDK*FYKDVLE; FPVSYNDK*FYKDVLE	LNQVIFPVSYNDK*FYK	2	1009.03	11250		11279	11317	11494	11416	11976	11896	11251		11296	11335	11511	11432	11977	11887	2.855		2.549	2.899	2.978	2.735	2.633	2.756	0.9562		1.1922	1.3365	1.1035	1.1287	1.0802	0.7629	0.36		0.305	0.35
548	533	Enzyme, misc.	Naa50; Naa50	NAA50; NAA50 iso4	§34; §40	N-alpha-acetyltransferase 50, NatE catalytic subunit	Q6PGB6; Q6PGB6-4	http://www.phosphosite.org/proteinAction.do?id=4323&showAllSites=true	19; 20	FPVSYNDK*FYKDVLE; FPVSYNDK*FYKDVLE	LNQVIFPVSYNDK*FYK	3	673.019						11435																2.3								1.8571
549	534	Enzyme, misc.	Naa50; Naa50	NAA50; NAA50 iso4	§34; §40	N-alpha-acetyltransferase 50, NatE catalytic subunit	Q6PGB6; Q6PGB6-4	http://www.phosphosite.org/proteinAction.do?id=4323&showAllSites=true	19; 20	FPVSYNDK*FYKDVLE; FPVSYNDK*FYKDVLE	LNQVIFPVSYNDK*FYKDVLEVGELAK	3	1024.21		14819				14922				14870								2.783				2.084				1.6779				1.6063				0.278
550	535	Enzyme, misc.	Naa50; Naa50	NAA50; NAA50 iso4	§34; §40	N-alpha-acetyltransferase 50, NatE catalytic subunit	Q6PGB6; Q6PGB6-4	http://www.phosphosite.org/proteinAction.do?id=4323&showAllSites=true	19; 20	FPVSYNDK*FYKDVLE; FPVSYNDK*FYKDVLE	RLNQVIFPVSYNDK*FYK	3	725.053								10529								10541								4.078								0.2332
551	536	Enzyme, misc.	Naa50; Naa50	NAA50; NAA50 iso4	§34; §40	N-alpha-acetyltransferase 50, NatE catalytic subunit	Q6PGB6; Q6PGB6-4	http://www.phosphosite.org/proteinAction.do?id=4323&showAllSites=true	19; 20	FPVSYNDK*FYKDVLE; FPVSYNDK*FYKDVLE	RLNQVIFPVSYNDK*FYKDVLEVGELAK	3	1076.24		13747						14437		13748						14428		2.243						2.14		1.1319						0.3592		0.343
552	537	Enzyme, misc.	Naa50; Naa50	NAA50; NAA50 iso4	§34; §40	N-alpha-acetyltransferase 50, NatE catalytic subunit	Q6PGB6; Q6PGB6-4	http://www.phosphosite.org/proteinAction.do?id=4323&showAllSites=true	19; 20	FPVSYNDK*FYKDVLE; FPVSYNDK*FYKDVLE	RLNQVIFPVSYNDK*FYKDVLEVGELAK	4	807.434	13252						14541		13704						14496		3.338						4.851		0.2241						1.1526		0.065
553	538	Enzyme, misc.	Naa50; Naa50	NAA50; NAA50 iso4	§37; §43	N-alpha-acetyltransferase 50, NatE catalytic subunit	Q6PGB6; Q6PGB6-4	http://www.phosphosite.org/proteinAction.do?id=4323&showAllSites=true	19; 20	SYNDKFYK*DVLEVGE; SYNDKFYK*DVLEVGE	LNQVIFPVSYNDKFYK*DVLEVGELAK	3	1024.21	14344		14388				15575	15045								15550	1.93		1.905				2.017	1.974	0.7299		0.6065				1.4796	0.5553	0.094		0.091
554	539	Enzyme, misc.	Naa50; Naa50	NAA50; NAA50 iso4	§37; §43	N-alpha-acetyltransferase 50, NatE catalytic subunit	Q6PGB6; Q6PGB6-4	http://www.phosphosite.org/proteinAction.do?id=4323&showAllSites=true	19; 20	SYNDKFYK*DVLEVGE; SYNDKFYK*DVLEVGE	RLNQVIFPVSYNDKFYK*DVLEVGELAK	4	807.434		13729		13297	13924			14412		13759		13744	13953			14428		5.08		3.546	5.847			3.2		1.3466		0.588	0.6698			0.9564		0.348		0.235
555	540	Enzyme, misc.	Naa50; Naa50	NAA50; NAA50 iso4	§37; §43	N-alpha-acetyltransferase 50, NatE catalytic subunit	Q6PGB6; Q6PGB6-4	http://www.phosphosite.org/proteinAction.do?id=4323&showAllSites=true	19; 20	SYNDKFYK*DVLEVGE; SYNDKFYK*DVLEVGE	RLNQVIFPVSYNDKFYK*DVLEVGELAK	4	807.434				13804								13744								3.395								1.2552								0.167
556	541	Enzyme, misc.	Naa50; Naa50	NAA50; NAA50 iso4	47; 53	N-alpha-acetyltransferase 50, NatE catalytic subunit	Q6PGB6; Q6PGB6-4	http://www.phosphosite.org/proteinAction.do?id=4323&showAllSites=true	19; 20	LEVGELAK*LAYFNDI; LEVGELAK*LAYFNDI	LNQVIFPVSYNDKFYKDVLEVGELAK*	3	1024.21		14905		14813														1.951		1.978						1.716		1.7215						0.2		0.162
557	542	Enzyme, misc.	Pelo	PELO	95, 114	protein pelota homolog	Q80X73	http://www.phosphosite.org/proteinAction.do?id=8934&showAllSites=true	43	IQENEYVK*MGAYHTI, NRQFTLAK*KQWDSVV	VK*MGAYHTIELEPNRQFTLAK*K	3	886.807			12161																2.79								1.1023								0.134
558	543	Enzyme, misc.	Plcb1; Plcb3	PLCB1; PLCB3	158; 159	1-phosphatidylinositol-4,5-bisphosphate phosphodiesterase beta-1 isoform 1	Q9Z1B3; P51432	http://www.phosphosite.org/proteinAction.do?id=5599&showAllSites=true	138; 139	FLEKAYTK*LKLQVTP; FLRKAYTK*LKLQVNQ	KAYTK*LK	2	447.276				1678																2.274								0.1414								0.026
559	544	Enzyme, misc.	Ppia	PPIA	§131	peptidyl-prolyl cis-trans isomerase A	P17742	http://www.phosphosite.org/proteinAction.do?id=7284&showAllSites=true	18	GKHVVFGK*VKEGMNI	HVVFGK*VK	2	478.29	3257	3277		3212	3300	3233	3600	3680	3305	3231		3251	3328	3273	3627	3707	1.993	1.966		2.048	2.003	1.947	2.183	2.249	-0.2419	-0.1623		0.0313	0.0711	-0.0692	0.1422	0.251	0.021	0.184		0.161
560	545	Enzyme, misc.	Pygb; Pygl; Pygm	PYGB; PYGL; PYGM	§290; §290; §290	glycogen phosphorylase, brain form	Q8CI94; Q9ET01; Q9WUB3	http://www.phosphosite.org/proteinAction.do?id=8093&showAllSites=true	97; 97; 97	NDNFFEGK*ELRLKQE; NDNFFEGK*ELRLKQE; NDNFFEGK*ELRLKQE	VLYPNDNFFEGK*ELR	2	941.97	10572			10626	10767			11177	10570			10616	10763			11179	2.911			2.324	2.555			2.799	1.51			1.5817	1.6151			1.0787	0.157			0.106
561	546	Enzyme, misc.	Pygb; Pygl; Pygm	PYGB; PYGL; PYGM	§290; §290; §290	glycogen phosphorylase, brain form	Q8CI94; Q9ET01; Q9WUB3	http://www.phosphosite.org/proteinAction.do?id=8093&showAllSites=true	97; 97; 97	NDNFFEGK*ELRLKQE; NDNFFEGK*ELRLKQE; NDNFFEGK*ELRLKQE	VLYPNDNFFEGK*ELR	3	628.316			10585	10598			11207				10601	10605			11204				5.064	3.052			3.438				1.0469	1.3438			1.7612				0.264	0.221
562	547	Enzyme, misc.	Taldo1	TALDO1	§321	transaldolase	Q93092	http://www.phosphosite.org/proteinAction.do?id=9223&showAllSites=true	37	KFAADAIK*LERMLTE	FAADAIK*LER	2	588.325			7012		7174						7004		7170						2.501		2.57						0.7585		0.7424						0.265
563	548	Enzyme, misc.	Top1	TOP1	150	DNA topoisomerase 1	Q04750	http://www.phosphosite.org/proteinAction.do?id=6475&showAllSites=true	91	DEDDADYK*PKKIKTE	LRDEDDADYK*PK	3	502.907						2873																2.228								-0.184
564	549	Enzyme, misc.	Upp2	UPP2	16	uridine phosphorylase 2	Q8CGR7	http://www.phosphosite.org/proteinAction.do?id=7583499&showAllSites=true	36	NRSMRPDK*NTYERKR	MASILPASNRSMRPDK*NTYER	3	827.077								11479																1.71								1.5736
565	550	Enzyme, misc.	Zadh2	ZADH2	§35	zinc-binding alcohol dehydrogenase domain-containing protein 2	Q8BGC4	http://www.phosphosite.org/proteinAction.do?id=1175190&showAllSites=true	41	AIPRTMQK*LVVTRLS	TMQK*LVVTR	2	559.323							5582																2.121								1.9687
566	G protein or regulator
567	551	G protein or regulator	Arhgef26	SGEF	437	Rho guanine nucleotide exchange factor (GEF) 26	D3YYY8	http://www.phosphosite.org/proteinAction.do?id=23358&showAllSites=true	97	TVSQEERK*RQEAIFE	RNGLSQTVSQEERK*	3	558.624			5553			5653					5519								2.646			2.284					2.6989			2.7377					0.058
568	552	G protein or regulator	Dock7; Dock7	DOCK7; DOCK7 iso3	§1952; §1920	dedicator of cytokinesis protein 7	Q8R1A4; NP_080358	http://www.phosphosite.org/proteinAction.do?id=9893&showAllSites=true	241; 238	GELHEQFK*RKTILTT; GELHEQFK*RKTILTT	AHGELHEQFK*R	2	697.352	2147	2108	2077	2131	2192	2103	2384	2471	2160	2134	2069	2125	2195	2115	2398	2476	2.698	3.722	3.079	2.635	2.752	2.953	3.371	3.18	0.3834	0.453	0.2011	0.7278	1.1167	0.3425	-0.5745	-0.3542	0.333	0.424	0.338	0.392
569	553	G protein or regulator	Dock7; Dock7	DOCK7; DOCK7 iso3	§1952; §1920	dedicator of cytokinesis protein 7	Q8R1A4; NP_080358	http://www.phosphosite.org/proteinAction.do?id=9893&showAllSites=true	241; 238	GELHEQFK*RKTILTT; GELHEQFK*RKTILTT	AHGELHEQFK*R	3	465.237	2172	2146		2148		2127	2400		2171	2123		2136		2115	2387		2.186	2.514		2.313		2.181	2.013		0.3245	-0.0034		0.552		0.694	-0.37		0.1	0.05		0.088
570	554	G protein or regulator	Rab4a	Rab4	55	ras-related protein Rab-4A	P56371	http://www.phosphosite.org/proteinAction.do?id=5359&showAllSites=true	24	KIINVGGK*YVKLQIW	IINVGGK*YVK	2	566.84							6385								6375								2.015								-0.0045
571	555	G protein or regulator	Ranbp1	RanBP1	§134	ran-specific GTPase-activating protein	P34022	http://www.phosphosite.org/proteinAction.do?id=7697&showAllSites=true	24	DFADECPK*PELLAIR	AWVWNTHADFADECPK*PELLAIR	3	927.787							12981	12911							12989	12932							4.41	2.721							0.1396	0.063
572	556	G protein or regulator	Tbc1d24	TBC1D24	§288	TBC1 domain family member 24 isoform a	Q3UUG6	http://www.phosphosite.org/proteinAction.do?id=16348&showAllSites=true	63	SPEKLLEK*AFAIRLF	LLEK*AFAIR	2	551.835								9395								9386								2.05								0.0087
573	Inhibitor protein
574	557	Inhibitor protein	Pebp1	RKIP	148	phosphatidylethanolamine-binding protein 1	P70296	http://www.phosphosite.org/proteinAction.do?id=2390&showAllSites=true	21	KSGDNRGK*FKVETFR	GK*FKVETFR	3	385.217	5332							5752	5305							5768	2.101							2.456	0.0885							-0.527	0.288
575	Ligand, receptor tyrosine kinase
576	558	Ligand, receptor tyrosine kinase	Efnb2	EFNB2	279	ephrin-B2 precursor	P52800	http://www.phosphosite.org/proteinAction.do?id=1578&showAllSites=true	37	LSTLATPK*RGGNNNG	TLATPK*R	2	414.75		2863																1.686								0.3483								0.012
577	Lipid binding protein
578	559	Lipid binding protein	Dbi	DBI	§51	acyl-CoA-binding protein isoform 1	P31786	http://www.phosphosite.org/proteinAction.do?id=14297&showAllSites=true	10	RPGLLDLK*GKAKWDS	QATVGDVNTDRPGLLDLK*GK	3	713.718			7813																2.699								1.0371								0.023
579	560	Lipid binding protein	Dbi	DBI	§55	acyl-CoA-binding protein isoform 1	P31786	http://www.phosphosite.org/proteinAction.do?id=14297&showAllSites=true	10	LDLKGKAK*WDSWNKL	AK*WDSWNK	2	538.762							7191								7211								2.283								-0.019
580	561	Lipid binding protein	Dbi	DBI	§55	acyl-CoA-binding protein isoform 1	P31786	http://www.phosphosite.org/proteinAction.do?id=14297&showAllSites=true	10	LDLKGKAK*WDSWNKL	AK*WDSWNKLK	3	439.903	7335	7283	7269	7312	7436	7390	7807	7871	7369	7306	7279	7328	7456	7410	7816	7879	2.21	2.341	2.715	2.242	2.963	2.759	2.216	2.693	0.4375	0.3146	0.4489	0.3131	0.2493	0.2288	0.2023	-0.1339	0.126	0.108	0.101	0.099
581	Mitochondrial protein
582	562	Mitochondrial protein	Abat	ABAT	§279	4-aminobutyrate aminotransferase, mitochondrial isoform 2 precursor	P61922	http://www.phosphosite.org/proteinAction.do?id=15703&showAllSites=true	56	EVEDLIVK*YRKKKRT	CLEEVEDLIVK*YR	3	569.959		12625		12720						12604		12699						3.075		3.017						1.1203		0.5564						0.09		0.111
583	563	Mitochondrial protein	Acadsb	ACADSB	§284	short/branched chain specific acyl-CoA dehydrogenase, mitochondrial	Q9DBL1	http://www.phosphosite.org/proteinAction.do?id=10575&showAllSites=true	48	GKIGHGYK*YAIGSLN	IGHGYK*YAIGSLNEGR	2	888.955	6549	6477	6440	6501			6913	6987	6545	6492	6465	6492			6925	6988	3.565	3.318	3.354	4.067			3.764	3.217	0.8383	0.7207	0.6487	1.2176			0.4736	0.8828	0.49	0.49	0.461	0.551
584	564	Mitochondrial protein	Acadsb	ACADSB	§284	short/branched chain specific acyl-CoA dehydrogenase, mitochondrial	Q9DBL1	http://www.phosphosite.org/proteinAction.do?id=10575&showAllSites=true	48	GKIGHGYK*YAIGSLN	IGHGYK*YAIGSLNEGR	3	592.972	6580	6493	6422	6473	6591	6545			6534	6492	6465	6514	6609	6585			3.174	3.811	2.785	3.07	3.714	3.159			0.2902	0.3161	0.4112	0.5665	0.3999	0.4883			0.092	0.242	0.264	0.142
585	565	Mitochondrial protein	Acadsb	ACADSB	§284	short/branched chain specific acyl-CoA dehydrogenase, mitochondrial	Q9DBL1	http://www.phosphosite.org/proteinAction.do?id=10575&showAllSites=true	48	GKIGHGYK*YAIGSLN	IGHGYK*YAIGSLNEGR	3	592.972	6494								6534								3.08								0.2502								0.116
586	566	Mitochondrial protein	Aco2	ACO2	§50	aconitate hydratase, mitochondrial precursor	Q99KI0	http://www.phosphosite.org/proteinAction.do?id=9181&showAllSites=true	85	IRYDLLEK*NINIVRK	YDLLEK*NINIVR	2	766.428		10408	10452	10466	10626	10575	11080	11041		10410	10458	10473	10620	10578	11083	11036		3.347	3.568	3.04	3.176	3.564	3.283	3.492		1.2402	1.9772	2.5445	2.1547	2.8859	0.195	0.4424		0.35	0.353	0.361
587	567	Mitochondrial protein	Aco2	ACO2	§577	aconitate hydratase, mitochondrial precursor	Q99KI0	http://www.phosphosite.org/proteinAction.do?id=9181&showAllSites=true	85	PFDKWDGK*DLEDLQI	LQLLEPFDKWDGK*DLEDLQILIK	3	937.844			15378					16031			15377					16023			4.232					4.648			0.8524					0.5721			0.168
588	568	Mitochondrial protein	Aco2	ACO2	§605	aconitate hydratase, mitochondrial precursor	Q99KI0	http://www.phosphosite.org/proteinAction.do?id=9181&showAllSites=true	85	SAAGPWLK*FRGHLDN	CTTDHISAAGPWLK*FR	3	634.649	9485		9483	9502	9603	9594	10032	9988	9470		9457	9462	9612	9555	10071	10035	3.313		3.71	2.98	3.544	3.555	3.019	3.351	0.8206		0.6381	0.7012	0.5156	0.4378	0.9231	0.4641	0.27		0.272	0.121
589	569	Mitochondrial protein	Aco2	ACO2	§689	aconitate hydratase, mitochondrial precursor	Q99KI0	http://www.phosphosite.org/proteinAction.do?id=9181&showAllSites=true	85	GGRAIITK*SFARIHE	AIITK*SFAR	2	524.811			6281		6394	6389		6802			6289		6906	6849		6823			2.526		1.86	2.297		2.51			-0.0097		0.2649	-0.2348		-0.2434			0.254
590	570	Mitochondrial protein	Acot10; Acot9	Acot10; ACOT9	§102; §102	acyl-coenzyme A thioesterase 10, mitochondrial precursor	Q32MW3; Q9R0X4	http://www.phosphosite.org/proteinAction.do?id=25516000&showAllSites=true	51; 51	TDPELRDK*YVTVQNT; TDPELRDK*YVTVQNT	DK*YVTVQNTVR	2	682.862	5243	5241	5157	5295	5296	5235	5566	5673	5283	5207	5200	5238	5336	5276	5605	5713	2.809	3.255	3	3.109	3.102	2.993	3.22	3.1	0.0908	0.1729	0.274	0.2857	0.1611	0.3033	0.0673	-0.2719	0.348	0.353	0.328	0.374
591	571	Mitochondrial protein	Acot10; Acot9	Acot10; ACOT9	§102; §102	acyl-coenzyme A thioesterase 10, mitochondrial precursor	Q32MW3; Q9R0X4	http://www.phosphosite.org/proteinAction.do?id=25516000&showAllSites=true	51; 51	TDPELRDK*YVTVQNT; TDPELRDK*YVTVQNT	DK*YVTVQNTVR	2	682.862	5330	5161	5251	5202	5410	5339	5662	5772	5283	5207	5200	5238	5336	5276	5605	5713	2.78	3.046	2.951	3.022	2.732	2.764	2.804	2.759	0.0988	0.1575	0.296	0.2417	0.1641	0.3062	0.071	-0.2221	0.307	0.37	0.274	0.374
592	572	Mitochondrial protein	Acot10; Acot9	Acot10; ACOT9	§102; §102	acyl-coenzyme A thioesterase 10, mitochondrial precursor	Q32MW3; Q9R0X4	http://www.phosphosite.org/proteinAction.do?id=25516000&showAllSites=true	51; 51	TDPELRDK*YVTVQNT; TDPELRDK*YVTVQNT	DK*YVTVQNTVR	2	682.862					5400								5336								2.664								0.1516
593	573	Mitochondrial protein	Acot2	ACOT2	§83	acyl-coenzyme A thioesterase 2, mitochondrial precursor	Q9QYR9	http://www.phosphosite.org/proteinAction.do?id=19723&showAllSites=true	50	RSALRDEK*GALFRAH	SALRDEK*GALFR	3	468.925		6633								6646								2.414								-0.0403								0.191
594	574	Mitochondrial protein	Ak3	AK3	§29	GTP:AMP phosphotransferase, mitochondrial	Q9WTP7	http://www.phosphosite.org/proteinAction.do?id=15789&showAllSites=true	25	TVSSRITK*HFELKHL	ITK*HFELK	2	529.306	4644	4566		4594		4636		5074		4591		4622					1.722	2.158		2.326		1.877		1.799	-0.3037	-0.3179		0.3393		-0.0512		-0.2479	0.05	0.127		0.051
595	575	Mitochondrial protein	Ak3	AK3	§34	GTP:AMP phosphotransferase, mitochondrial	Q9WTP7	http://www.phosphosite.org/proteinAction.do?id=15789&showAllSites=true	25	ITKHFELK*HLSSGDL	HFELK*HLSSGDLLR	2	847.455		7953								7944								4.721								0.9138								0.305
596	576	Mitochondrial protein	Ak3	AK3	§34	GTP:AMP phosphotransferase, mitochondrial	Q9WTP7	http://www.phosphosite.org/proteinAction.do?id=15789&showAllSites=true	25	ITKHFELK*HLSSGDL	HFELK*HLSSGDLLR	3	565.306	7999	7924	7942	7978	8095	8027	8414	8441	7974	7944	7928	7966	8094	8048	8432	8462	3.319	3.672	4.118	3.868	3.937	3.858	3.416	4.217	0.0802	0.0714	0.2916	0.3347	0.2573	0.2243	0.0531	-0.3926	0.279	0.357	0.394	0.332
597	577	Mitochondrial protein	Aldh4a1	ALDH4A1	§92	delta-1-pyrroline-5-carboxylate dehydrogenase, mitochondrial precursor	Q8CHT0	http://www.phosphosite.org/proteinAction.do?id=15730&showAllSites=true	62	NHAHKVAK*FCYADKA	VAK*FCYADK	2	572.279				4749		4814						4743								2.404		1.383						0.3323		0.9129						0.219
598	578	Mitochondrial protein	Aldh5a1	ALDH5A1	§353	succinate-semialdehyde dehydrogenase, mitochondrial precursor	Q8BWF0	http://www.phosphosite.org/proteinAction.do?id=10569&showAllSites=true	56	TKFAEAMK*KSLRVGN	FAEAMK*K	2	433.726			2825	2865							2827	2866							1.932	1.978							-1.0699	0.5862							0.065	0.059
599	579	Mitochondrial protein	Aldoa; Aldoart1; Aldoc	ALDOA; Aldoart1; ALDOC	§147; §147; §147	fructose-bisphosphate aldolase A isoform 1	P05064; Q9CPQ9; P05063	http://www.phosphosite.org/proteinAction.do?id=4240&showAllSites=true	39; 39; 39	KDGADFAK*WRCVLKI; KDGADFAK*WRCVLKI; KDGADFAK*WRCVLKI	DGADFAK*WR	2	554.264							8094								8102								2.797								0.111
600	580	Mitochondrial protein	Aldoa; Aldoart1; Aldoc	ALDOA; Aldoart1; ALDOC	§147; §147; §147	fructose-bisphosphate aldolase A isoform 1	P05064; Q9CPQ9; P05063	http://www.phosphosite.org/proteinAction.do?id=4240&showAllSites=true	39; 39; 39	KDGADFAK*WRCVLKI; KDGADFAK*WRCVLKI; KDGADFAK*WRCVLKI	KDGADFAK*WR	3	412.544		5315																2.217								0.479								0.02
601	581	Mitochondrial protein	Aldoa; Aldoart1	ALDOA; Aldoart1	230; 230	fructose-bisphosphate aldolase A isoform 1	P05064; Q9CPQ9	http://www.phosphosite.org/proteinAction.do?id=4240&showAllSites=true	39; 39	YLEGTLLK*PNMVTPG; YLEGTLLK*PNMVTPG	ALSDHHVYLEGTLLK*PNM#VTPGHACTQK	4	794.647			6915		7075		7314	7361			6927		7115		7343	7428			4.146		3.979		3.89	2.978			1.1514		1.2764		0.1314	0.4768			0.255
602	582	Mitochondrial protein	Aldoa; Aldoart1	ALDOA; Aldoart1	243; 243	fructose-bisphosphate aldolase A isoform 1	P05064; Q9CPQ9	http://www.phosphosite.org/proteinAction.do?id=4240&showAllSites=true	39; 39	PGHACTQK*FSNEEIA; PGHACTQK*FSNEEIA	ALSDHHVYLEGTLLKPNM#VTPGHACTQK*	4	794.647		6949								6921								2.822								1.0909								0.108
603	583	Mitochondrial protein	Aldoa	ALDOA	§42	fructose-bisphosphate aldolase A isoform 1	P05064	http://www.phosphosite.org/proteinAction.do?id=4240&showAllSites=true	39	ESTGSIAK*RLQSIGT	GILAADESTGSIAK*R	2	765.91	5982	5937	5919	5969	6058	6015	6351	6426	6009	5964	5948	5997	6073	6024	6375	6449	4.287	4.285	4.791	4.205	4.166	3.756	3.925	3.998	0.3488	0.4697	0.3416	0.6715	0.55	0.4422	0.3821	0.0764	0.482	0.409	0.503	0.462
604	584	Mitochondrial protein	Atad3a	ATAD3A	§490	ATPase family AAA domain-containing protein 3	Q925I1	http://www.phosphosite.org/proteinAction.do?id=15738&showAllSites=true	67	LVRMYFDK*YVLKPAT	M#YFDK*YVLKPATEGK	3	616.646							8209	8261								8242							1.647	2.141							0.1889	-0.375
605	585	Mitochondrial protein	Atp5b	ATP5B	§522	ATP synthase subunit beta, mitochondrial precursor	P56480	http://www.phosphosite.org/proteinAction.do?id=15701&showAllSites=true	56	EAVAKADK*LAEEHGS	ADK*LAEEHGS	2	549.757		2253	2220	2258	2328	2259	2547	2623		2255	2230	2278	2338	2269	2566	2643		2.957	2.732	2.352	2.875	2.814	2.694	3.053		-0.2127	-0.0169	0.0176	-0.0106	0.1961	-0.1735	-0.463		0.297	0.285	0.247
606	586	Mitochondrial protein	Atp5b	ATP5B	§522	ATP synthase subunit beta, mitochondrial precursor	P56480	http://www.phosphosite.org/proteinAction.do?id=15701&showAllSites=true	56	EAVAKADK*LAEEHGS	ADK*LAEEHGS	2	549.757		2256								2255								2.9								-0.2127								0.322
607	587	Mitochondrial protein	Atp5j2	ATP5J2	48	ATP synthase subunit f, mitochondrial	P56135	http://www.phosphosite.org/proteinAction.do?id=19741&showAllSites=true	10	GYDRYYNK*YINVRKG	YYNK*YINVR	2	637.83	6448	6389		6407	6528	6482	6855	6969	6457	6415		6415	6543	6497	6881	6966	2.615	2.399		2.321	2.385	2.295	2.363	2.564	0.0578	-0.3164		0.1339	-0.3281	-0.2583	0.0014	-0.0269	0.309	0.253		0.195
608	588	Mitochondrial protein	Atpif1	ATPIF1	83	ATPase inhibitor, mitochondrial precursor	O35143	http://www.phosphosite.org/proteinAction.do?id=17520&showAllSites=true	12	DEIDHHSK*EIERLQK	KHHEDEIDHHSK*EIER	4	521		1500					1690								1683			2.464					2.593			0.369					-0.4537			0.001
609	589	Mitochondrial protein	Bdh1	BDH	§275	D-beta-hydroxybutyrate dehydrogenase, mitochondrial precursor	Q80XN0	http://www.phosphosite.org/proteinAction.do?id=9209&showAllSites=true	38	VRKDYGRK*YFDEKIA	K*YFDEK	2	436.213							3743	3837							3747	3839							1.805	1.689							0.2634	0.0305
610	590	Mitochondrial protein	Cs	CS	§327	citrate synthase, mitochondrial precursor	Q9CZU6	http://www.phosphosite.org/proteinAction.do?id=13877&showAllSites=true	52	GKDVSDEK*LRDYIWN	EVGKDVSDEK*LR	2	708.87	3117	3045		3049	3157				3118	3198		3053	3152				2.321	2.542		2.268	2.435				0.1715	-0.4031		1.2909	0.9804				0.11	0.156		0.12
611	591	Mitochondrial protein	Dcakd	DCAKD	166	dephospho-CoA kinase domain-containing protein	Q8BHC4	http://www.phosphosite.org/proteinAction.do?id=1847200&showAllSites=true	26	INAQLPLK*DKARMAN	QLPLK*DKAR	2	555.835	4459			3992	4088		4334										2.28			1.982	2.117		1.968		0.1287			0.5069	0.3898		0.3394		0.006			0.07
612	592	Mitochondrial protein	Dld	DLD	§104	dihydrolipoyl dehydrogenase, mitochondrial precursor	O08749	http://www.phosphosite.org/proteinAction.do?id=9221&showAllSites=true	54	YYHMAHGK*DFASRGI	ALLNNSHYYHMAHGK*DFASR	4	594.284						5314								5331								1.596								1.3294
613	593	Mitochondrial protein	Dld	DLD	§410	dihydrolipoyl dehydrogenase, mitochondrial precursor	O08749	http://www.phosphosite.org/proteinAction.do?id=9221&showAllSites=true	54	GKSEEQLK*EEGIEFK	SEEQLK*EEGIEFK	2	804.394	7530	7492							7545	7482							4.077	3.744							0.4087	1.0307							0.29	0.293
614	594	Mitochondrial protein	Dld	DLD	§420	dihydrolipoyl dehydrogenase, mitochondrial precursor	O08749	http://www.phosphosite.org/proteinAction.do?id=9221&showAllSites=true	54	GIEFKIGK*FPFAANS	IGK*FPFAANSR	2	625.338							8763	8771							8718	8759							3.012	3.202							0.5844	0.0523
615	595	Mitochondrial protein	Ech1	ECH1	308, §316	delta(3,5)-Delta(2,4)-dienoyl-CoA isomerase, mitochondrial precursor	O35459	http://www.phosphosite.org/proteinAction.do?id=19767&showAllSites=true	36	LQTQDIIK*SVQAAME, SVQAAMEK*RDTKSIT	LQTQDIIK*SVQAAMEK*RDTK	3	796.425					16019																2.484								0.3922
616	596	Mitochondrial protein	Fh1	FH	§220	fumarate hydratase, mitochondrial precursor	P97807	http://www.phosphosite.org/proteinAction.do?id=7201&showAllSites=true	54	DALSAKSK*EFAQVIK	SK*EFAQVIK	2	546.308						6040	6424	6519								6493						2.011	1.933	2.004						-0.1095	0.2771	-0.5904
617	597	Mitochondrial protein	Fh1	FH	§63	fumarate hydratase, mitochondrial precursor	P97807	http://www.phosphosite.org/proteinAction.do?id=7201&showAllSites=true	54	ELKVPTDK*YYGAQTV	TDK*YYGAQTVR	2	672.333		3830																3.038								-0.4062								0.155
618	598	Mitochondrial protein	Fh1	FH	§63	fumarate hydratase, mitochondrial precursor	P97807	http://www.phosphosite.org/proteinAction.do?id=7201&showAllSites=true	54	ELKVPTDK*YYGAQTV	VEFDTFGELKVPTDK*YYGAQTVR	3	902.453	10778	10780	10821	10835	11005	10953	11410	11347	10791	10801	10836	10856	11008	10951	11413	11366	3.761	4.648	4.91	4.663	4.037	2.856	3.807	5.361	0.0943	0.5224	0.7638	0.7867	0.4514	0.1705	0.8059	-0.2446	0.348	0.458	0.358	0.394
619	599	Mitochondrial protein	Fh1	FH	§63	fumarate hydratase, mitochondrial precursor	P97807	http://www.phosphosite.org/proteinAction.do?id=7201&showAllSites=true	54	ELKVPTDK*YYGAQTV	VEFDTFGELKVPTDK*YYGAQTVR	3	902.453			10822	10838	11012						10836	10856	11008						4.13	2.974	3.123						0.7638	0.7867	0.3812						0.411	0.226
620	600	Mitochondrial protein	Fh1	FH	§63	fumarate hydratase, mitochondrial precursor	P97807	http://www.phosphosite.org/proteinAction.do?id=7201&showAllSites=true	54	ELKVPTDK*YYGAQTV	VPTDK*YYGAQTVR	2	770.394	4982	4926	4875	4932	5019		5279	5390	4988	4921	4903	4941	5032		5308	5405	3.894	3.938	4.16	3.658	4.028		4.064	4.116	1.0433	0.1561	0.8016	0.6516	0.7153		0.3951	-0.2647	0.379	0.464	0.415	0.482
621	601	Mitochondrial protein	Fh1	FH	§63	fumarate hydratase, mitochondrial precursor	P97807	http://www.phosphosite.org/proteinAction.do?id=7201&showAllSites=true	54	ELKVPTDK*YYGAQTV	VPTDK*YYGAQTVR	2	770.394				4968								4941								3.047								0.6516								0.315
622	602	Mitochondrial protein	Fsip2	FSIP2	4133	PREDICTED: hypothetical protein LOC241516	A2ARZ3	http://www.phosphosite.org/proteinAction.do?id=3248118&showAllSites=true	785	YKLHNSLK*NFNSEPM	LHNSLK*NFNSEPM#TSKDYSTML	4	654.558							5820																2.541								0.6493
623	603	Mitochondrial protein	Gfm1	EFG1	745, 746, 748	elongation factor G, mitochondrial precursor	Q8K0D5	http://www.phosphosite.org/proteinAction.do?id=1169906&showAllSites=true	84	ATGQLPVK*KGKAKN-, TGQLPVKK*GKAKN--, QLPVKKGK*AKN----	PVK*K*GK*AKN	2	548.33				5109																1.991								0.3642								0.1
624	604	Mitochondrial protein	Glud1	GLUD1	§346	glutamate dehydrogenase 1, mitochondrial precursor	P26443	http://www.phosphosite.org/proteinAction.do?id=9550&showAllSites=true	61	NPDGIDPK*ELEDFKL	CVGVGESDGSIWNPDGIDPK*ELEDFKLQHGSILGFPK	4	1021.5	12887						13612										2.829						2.267		1.6415						-0.2038		0.106
625	605	Mitochondrial protein	Glud1	GLUD1	363	glutamate dehydrogenase 1, mitochondrial precursor	P26443	http://www.phosphosite.org/proteinAction.do?id=9550&showAllSites=true	61	GSILGFPK*AKVYEGS	CVGVGESDGSIWNPDGIDPKELEDFKLQHGSILGFPK*	4	1021.5		12910								12945								2.352								0.9728								0.289
626	606	Mitochondrial protein	Glud1	GLUD1	§457	glutamate dehydrogenase 1, mitochondrial precursor	P26443	http://www.phosphosite.org/proteinAction.do?id=9550&showAllSites=true	61	SYGRLTFK*YERDSNY	LTFK*YER	2	499.769	6054	5899	5961	5932	6019	5981	6376	6472	6020	5931	5915	5964	6051	6013	6408	6493	2.146	2.071	2.398	2.239	2.027	2.267	2.188	2.169	0.0592	0.0772	0.2064	0.2455	0.2956	0.1213	-0.1601	-0.4676	0.043	0.179	0.058	0.07
627	607	Mitochondrial protein	Glud1	GLUD1	§457	glutamate dehydrogenase 1, mitochondrial precursor	P26443	http://www.phosphosite.org/proteinAction.do?id=9550&showAllSites=true	61	SYGRLTFK*YERDSNY	LTFK*YER	2	499.769	5966		5873								5915						1.782		2.236						0.0652		0.2044						0.043		0.142
628	608	Mitochondrial protein	Glud1	GLUD1	§503	glutamate dehydrogenase 1, mitochondrial precursor	P26443	http://www.phosphosite.org/proteinAction.do?id=9550&showAllSites=true	61	RISGASEK*DIVHSGL	ISGASEK*DIVHSGLAYTM#ER	3	741.363	7989	7967	7943	8068	8121	8074	8482	8502	8018	8010	7972	8021	8149	8081	8531	8517	4.923	4.723	4.863	4.738	4.327	4.672	4.734	4.729	0.6425	0.5556	0.5822	0.7388	0.7523	0.7852	0.6857	0.386	0.462	0.365	0.394	0.428
629	609	Mitochondrial protein	Glud1	GLUD1	§503	glutamate dehydrogenase 1, mitochondrial precursor	P26443	http://www.phosphosite.org/proteinAction.do?id=9550&showAllSites=true	61	RISGASEK*DIVHSGL	ISGASEK*DIVHSGLAYTM#ER	3	741.363	8077	8058	8043	7975					8018	8010	7972	8021					4.212	4.646	2.663	4.667					0.624	0.5669	0.5723	0.742					0.399	0.384	0.299	0.436
630	610	Mitochondrial protein	Glud1	GLUD1	§527	glutamate dehydrogenase 1, mitochondrial precursor	P26443	http://www.phosphosite.org/proteinAction.do?id=9550&showAllSites=true	61	QIMRTAMK*YNLGLDL	TAMK*YNLGLDLR	2	718.882	9748	9742	9759	9784	9954	9901	10406	10370	9778	9772	9787	9802	9982	9907	10434	10387	3.306	2.938	3.491	3.111	3.136	3.054	3.379	2.868	1.0409	0.8203	1.208	0.6797	0.2997	1.0917	0.7639	0.4967	0.229	0.201	0.287	0.268
631	611	Mitochondrial protein	Glud1	GLUD1	§527	glutamate dehydrogenase 1, mitochondrial precursor	P26443	http://www.phosphosite.org/proteinAction.do?id=9550&showAllSites=true	61	QIMRTAMK*YNLGLDL	TAMK*YNLGLDLR	2	718.882	9849								9778								2.968								0.6581								0.236
632	612	Mitochondrial protein	Glud1	GLUD1	§527	glutamate dehydrogenase 1, mitochondrial precursor	P26443	http://www.phosphosite.org/proteinAction.do?id=9550&showAllSites=true	61	QIMRTAMK*YNLGLDL	TAM#K*YNLGLDLR	2	726.879	8693	8739	8744	8782	8805	8890	9250	9240	8733	8692	8698	8736	8853	8840	9301	9276	4.235	3.487	3.586	3.627	3.564	3.178	3.85	3.989	0.3744	0.6147	0.7083	0.7076	0.4144	0.5658	0.2202	-0.0482	0.32	0.333	0.325	0.346
633	613	Mitochondrial protein	Glud1	GLUD1	§527	glutamate dehydrogenase 1, mitochondrial precursor	P26443	http://www.phosphosite.org/proteinAction.do?id=9550&showAllSites=true	61	QIMRTAMK*YNLGLDL	TAM#K*YNLGLDLR	2	726.879	8791	8640	8646	8690	8900	8789	9454	9333	8733	8692	8698	8736	8853	8840	9301	9276	3.527	3.482	3.56	3.343	3.546	3.086	3.438	3.441	0.4859	0.5087	0.6849	0.6897	0.4701	0.5073	0.2801	0.1239	0.363	0.352	0.317	0.327
634	614	Mitochondrial protein	Glud1	GLUD1	§527	glutamate dehydrogenase 1, mitochondrial precursor	P26443	http://www.phosphosite.org/proteinAction.do?id=9550&showAllSites=true	61	QIMRTAMK*YNLGLDL	TAM#K*YNLGLDLR	2	726.879	8895	8842	8845	8884	9005		9348		8733	8692	8698	8736	8853		9301		2.604	2.703	2.648	2.614	2.684		3.364		0.4164	0.5665	0.5919	0.5706	0.4433		0.3951		0.22	0.326	0.311	0.28
635	615	Mitochondrial protein	Glud1	GLUD1	§527	glutamate dehydrogenase 1, mitochondrial precursor	P26443	http://www.phosphosite.org/proteinAction.do?id=9550&showAllSites=true	61	QIMRTAMK*YNLGLDL	TAM#K*YNLGLDLR	3	484.922					8844								8864								3.019								0.9003
636	616	Mitochondrial protein	Glud1	GLUD1	§68	glutamate dehydrogenase 1, mitochondrial precursor	P26443	http://www.phosphosite.org/proteinAction.do?id=9550&showAllSites=true	61	EDDPNFFK*MVEGFFD	SEAAADREDDPNFFK*M#VEGFFDR	3	917.738	13799	13876	13880	13875	14082	14025	14692		13847	13902	13892	13887	14074	14017	14683		4.282	5.162	5.075	4.874	3.672	4.094	4.294		1.4765	1.5077	1.7971	1.555	0.9178	2.2536	1.2555		0.534	0.438	0.546	0.366
637	617	Mitochondrial protein	Glud1	GLUD1	§68	glutamate dehydrogenase 1, mitochondrial precursor	P26443	http://www.phosphosite.org/proteinAction.do?id=9550&showAllSites=true	61	EDDPNFFK*MVEGFFD	SEAAADREDDPNFFK*M#VEGFFDR	3	917.738				13895																3.864								1.555								0.308
638	618	Mitochondrial protein	Glud1	GLUD1	§84	glutamate dehydrogenase 1, mitochondrial precursor	P26443	http://www.phosphosite.org/proteinAction.do?id=9550&showAllSites=true	61	GASIVEDK*LVEDLKT	GASIVEDK*LVEDLK	2	779.422	10935	10944	10959	11000	11174	11116	11677	11581	10943	10954	10966	11005	11170	11135	11669	11590	3.506	3.474	3.189	3.41	3.127	3.448	3.438	2.667	0.4899	0.6549	0.9296	0.9091	0.5708	0.6722	0.4174	0.3615	0.322	0.28	0.277	0.309
639	619	Mitochondrial protein	Glud1	GLUD1	§84	glutamate dehydrogenase 1, mitochondrial precursor	P26443	http://www.phosphosite.org/proteinAction.do?id=9550&showAllSites=true	61	GASIVEDK*LVEDLKT	GASIVEDK*LVEDLKTR	3	605.667							10809	10787							10808	10772							2.851	2.758							0.6698	0.2323
640	620	Mitochondrial protein	Glud1	GLUD1	§90	glutamate dehydrogenase 1, mitochondrial precursor	P26443	http://www.phosphosite.org/proteinAction.do?id=9550&showAllSites=true	61	DKLVEDLK*TRESEEQ	GASIVEDKLVEDLK*TR	2	907.996	9445	9415	9420	9422	9611		10045	9979	9459	9418	9457	9429	9612		10060	9991	4.693	4.539	4.404	3.212	3.766		2.975	4.462	0.6538	0.7359	0.8131	0.9684	0.8869		0.9144	0.6472	0.376	0.39	0.418	0.374
641	621	Mitochondrial protein	Glud1	GLUD1	§90	glutamate dehydrogenase 1, mitochondrial precursor	P26443	http://www.phosphosite.org/proteinAction.do?id=9550&showAllSites=true	61	DKLVEDLK*TRESEEQ	GASIVEDKLVEDLK*TR	3	605.667	9505	9389	9392	9399	9613	9556	10015	10049	9459	9418	9435	9429	9612	9544	10060	9991	5.001	5.142	3.327	4.19	5.318	5.032	2.533	3.958	0.4323	0.4555	0.5254	0.5987	0.3888	0.3811	0.6566	0.2164	0.321	0.324	0.23	0.285
642	622	Mitochondrial protein	Glud1	GLUD1	§90	glutamate dehydrogenase 1, mitochondrial precursor	P26443	http://www.phosphosite.org/proteinAction.do?id=9550&showAllSites=true	61	DKLVEDLK*TRESEEQ	GASIVEDKLVEDLK*TR	3	605.667				9497								9429								3.072								0.6048								0.251
643	623	Mitochondrial protein	Got2	GOT2	§150	aspartate aminotransferase, mitochondrial	P05202	http://www.phosphosite.org/proteinAction.do?id=10223&showAllSites=true	47	SFLQRFFK*FSRDVFL	FFK*FSR	2	437.235	7249	7187	7170	7210		7290	7719		7248	7163	7158			7278			2.057	1.979	2.173	1.917		2.176	1.952		-0.2988	-0.4339	-0.4351	-0.6217		-0.4202	-0.2164		0	0	0	0
644	624	Mitochondrial protein	Got2	GOT2	§150	aspartate aminotransferase, mitochondrial	P05202	http://www.phosphosite.org/proteinAction.do?id=10223&showAllSites=true	47	SFLQRFFK*FSRDVFL	FFK*FSR	2	437.235	7230								7248								2.027								-0.498								0
645	625	Mitochondrial protein	Got2	GOT2	§296	aspartate aminotransferase, mitochondrial	P05202	http://www.phosphosite.org/proteinAction.do?id=10223&showAllSites=true	47	GAFTVVCK*DAEEAKR	VGAFTVVCK*DAEEAK	2	833.411	7714	7675	7638	7683	7805	7813	8187	8229	7732	7658	7664	7680	7797	7784	8190	8242	3.521	3.516	3.323	3.486	3.552	2.618	4.085	3.292	0.6294	0.8281	0.6	0.902	1.1559	0.6696	0.4151	0.307	0.347	0.285	0.406	0.377
646	626	Mitochondrial protein	Got2	GOT2	§302	aspartate aminotransferase, mitochondrial	P05202	http://www.phosphosite.org/proteinAction.do?id=10223&showAllSites=true	47	CKDAEEAK*RVESQLK	DAEEAK*RVESQLK	2	772.899	4920	4807		4837	4929	4885	5226	5333	4933	4833		4842	4944	4892	5231	5339	2.72	2.562		3.063	3.245	2.714	3.152	3.27	0.0967	-0.2095		0.0003	-0.2438	0.4171	-0.0729	-0.5105	0.026	0.079		0.195
647	627	Mitochondrial protein	Got2	GOT2	§302	aspartate aminotransferase, mitochondrial	P05202	http://www.phosphosite.org/proteinAction.do?id=10223&showAllSites=true	47	CKDAEEAK*RVESQLK	DAEEAK*RVESQLK	3	515.602			4817	4854	4956	4894					4815		4944	4892					2.572	1.936	2.486	2.92					-0.1331	-0.1991	-0.3027	-0.2613					0.132	0.049
648	628	Mitochondrial protein	Got2	GOT2	§302	aspartate aminotransferase, mitochondrial	P05202	http://www.phosphosite.org/proteinAction.do?id=10223&showAllSites=true	47	CKDAEEAK*RVESQLK	VGAFTVVCKDAEEAK*R	3	607.977		7007	6957	7019						6998	6971	7031						4.871	3.997	4.084						0.7012	0.4866	0.8977						0.334	0.361	0.434
649	629	Mitochondrial protein	Got2	GOT2	§302	aspartate aminotransferase, mitochondrial	P05202	http://www.phosphosite.org/proteinAction.do?id=10223&showAllSites=true	47	CKDAEEAK*RVESQLK	VGAFTVVCKDAEEAK*R	3	607.977			6941								6971								2.64								0.4866								0.102
650	630	Mitochondrial protein	Got2	GOT2	§396	aspartate aminotransferase, mitochondrial	P05202	http://www.phosphosite.org/proteinAction.do?id=10223&showAllSites=true	47	EQVERLTK*EFSVYMT	LTK*EFSVYM#TK	2	702.858	6884	6825	6823	6849	6993	6924	7306	7369	6896	6833	6817	6844	6983	7113	7299	7384	2.594	3.277	3.003	2.987	2.31	2.984	2.875	2.969	0.094	0.2065	0.529	0.781	0.5361	0.2848	0.1175	-0.1402	0.295	0.407	0.261	0.364
651	631	Mitochondrial protein	Got2	GOT2	§396	aspartate aminotransferase, mitochondrial	P05202	http://www.phosphosite.org/proteinAction.do?id=10223&showAllSites=true	47	EQVERLTK*EFSVYMT	LTK*EFSVYM#TK	2	702.858		6828		6848	6978					6833		6844	6983					2.554		2.527	2.301					0.2065		0.781	0.4792					0.133		0.204
652	632	Mitochondrial protein	Got2	GOT2	§404	aspartate aminotransferase, mitochondrial	P05202	http://www.phosphosite.org/proteinAction.do?id=10223&showAllSites=true	47	EFSVYMTK*DGRISVA	EFSVYMTK*DGR	2	687.822	7385	7345	7316	7370	7498	7435	7878	7931	7391	7339	7312	7350	7500	7432	7871	7945	3.129	2.843	3.094	3.029	2.714	2.816	3.071	3.274	0.6157	0.3655	0.6099	0.5874	0.236	0.7656	0.1	-0.0142	0.388	0.435	0.441	0.395
653	633	Mitochondrial protein	Got2	GOT2	52	aspartate aminotransferase, mitochondrial	P05202	http://www.phosphosite.org/proteinAction.do?id=10223&showAllSites=true	47	LGVTEAFK*RDTNSKK	SSWWTHVEM#GPPDPILGVTEAFK*R	3	933.458							14212	14146							14232	14164							5.815	5.715							1.257	1.0641
654	634	Mitochondrial protein	Got2	GOT2	§73	aspartate aminotransferase, mitochondrial	P05202	http://www.phosphosite.org/proteinAction.do?id=10223&showAllSites=true	47	AYRDDNGK*PYVLPSV	DDNGK*PYVLPSVR	2	751.386	7835	7786	7776		7937	7906	8334	8351	7864	7834	7807		7984	7938	8355	8385	3.171	2.147	2.616		3.228	2.407	2.724	3.072	0.2959	0.4617	0.4877		0.1981	0.2906	0.1767	-0.0457	0.085	0.07	0.131
655	635	Mitochondrial protein	Got2	GOT2	§73	aspartate aminotransferase, mitochondrial	P05202	http://www.phosphosite.org/proteinAction.do?id=10223&showAllSites=true	47	AYRDDNGK*PYVLPSV	DDNGK*PYVLPSVR	2	751.386	7855							8409	7864							8385	2.906							2.353	0.2953							-0.0496	0.265
656	636	Mitochondrial protein	Got2	GOT2	§73	aspartate aminotransferase, mitochondrial	P05202	http://www.phosphosite.org/proteinAction.do?id=10223&showAllSites=true	47	AYRDDNGK*PYVLPSV	MNLGVGAYRDDNGK*PYVLPSVR	3	821.753			9295								9292								3.995								0.3965								0.317
657	637	Mitochondrial protein	Got2	GOT2	§73	aspartate aminotransferase, mitochondrial	P05202	http://www.phosphosite.org/proteinAction.do?id=10223&showAllSites=true	47	AYRDDNGK*PYVLPSV	M#NLGVGAYRDDNGK*PYVLPSVR	3	827.085	8364	8336	8338	8378	8485	8451	8845	8839	8392	8362	8379	8406	8523	8499	8861	8869	4.062	3.358	5.247	4.709	4.59	4.063	4.226	4.221	0.5389	0.6974	0.749	1.0391	0.7216	0.5486	0.5938	0.4038	0.415	0.239	0.428	0.449
658	638	Mitochondrial protein	Hibch	HIBCH	§352	3-hydroxyisobutyryl-CoA hydrolase, mitochondrial precursor	Q8QZS1	http://www.phosphosite.org/proteinAction.do?id=10477&showAllSites=true	43	VRAVLIDK*DQTPKWK	AVLIDK*DQTPK	2	635.356	4931		4857	4896	4997	4935		5348	4911		4848	4897	4999	4914		5339	2.825		2.294	2.57	2.865	2.217		2.356	0.0965		0.4147	0.2092	0.1257	0.8928		0.3194	0.21		0.192	0.262
659	639	Mitochondrial protein	Hk1; Hk1	HK1; HK1 iso3	402; 345	hexokinase-1 isoform HK1	P17710; G3UVV4	http://www.phosphosite.org/proteinAction.do?id=10900&showAllSites=true	108; 102	VAAIETDK*EGVQNAK; VAAIETDK*EGVQNAK	GKFTTSDVAAIETDK*EGVQNAK	3	784.396		7107	7102				7551			7097	7081				7563			3.089	3.876				3.946			1.0839	2.7942				0.7879			0.246	0.129
660	640	Mitochondrial protein	Hspe1	HSPE1	§86	10 kDa heat shock protein, mitochondrial	Q64433	http://www.phosphosite.org/proteinAction.do?id=9560&showAllSites=true	11	TKVVLDDK*DYFLFRD	VVLDDK*DYFLFR	2	786.409				12242				12858				12237				12866				2.74				2.514				1.6375				2.4754				0.308
661	641	Mitochondrial protein	Hspe1	HSPE1	§99	10 kDa heat shock protein, mitochondrial	Q64433	http://www.phosphosite.org/proteinAction.do?id=9560&showAllSites=true	11	RDSDILGK*YVD----	DSDILGK*YVD	2	583.782	10583	10537	10583	10610	10766	10709			10581	10553	10612	10605	10774	10721			1.975	1.753	2.083	1.98	1.657	2.22			0.4573	0.3562	0.7299	0.5491	0.6888	0.4702			0.319	0.223	0.342	0.342
662	642	Mitochondrial protein	Idh2	IDH2	§106	isocitrate dehydrogenase [NADP], mitochondrial precursor	P54071	http://www.phosphosite.org/proteinAction.do?id=9668&showAllSites=true	51	DSALATQK*YSVAVKC	YFDLGLPNRDQTNDQVTIDSALATQK*YSVAVK	4	903.96		11917			12150			12549					12171			12558		2.453			3.898			3.062		2.0169			2.217			1.1312		0.017
663	643	Mitochondrial protein	Idh2	IDH2	§166	isocitrate dehydrogenase [NADP], mitochondrial precursor	P54071	http://www.phosphosite.org/proteinAction.do?id=9668&showAllSites=true	51	RLVPGWTK*PITIGRH	LVPGWTK*PITIGR	2	740.438	10134								10141								1.874								0.6353								0.112
664	644	Mitochondrial protein	Idh2	IDH2	§180	isocitrate dehydrogenase [NADP], mitochondrial precursor	P54071	http://www.phosphosite.org/proteinAction.do?id=9668&showAllSites=true	51	HAHGDQYK*ATDFVVD	HAHGDQYK*ATDFVVDR	3	634.303	5079	4980	4988	5024	5116	5053	5372	5492	5074	4998	4980	5029	5120	5067	5396	5493	3.327	4.098	3.696	3.655	3.13	3.622	4.362	3.785	0.3939	0.1577	-0.0633	0.577	0.3108	0.8621	0.427	0.053	0.308	0.333	0.271	0.184
665	645	Mitochondrial protein	Idh2	IDH2	§384	isocitrate dehydrogenase [NADP], mitochondrial precursor	P54071	http://www.phosphosite.org/proteinAction.do?id=9668&showAllSites=true	51	RGLEHRGK*LDGNQDL	GK*LDGNQDLIR	2	635.841	5971	5913	5890	5938	6028	5985			5976	5920	5882	5953	6040	5980			2.767	2.91	3.195	3.027	2.92	3.115			-0.0884	0.3036	0.0769	0.4098	0.8545	0.1391			0.283	0.334	0.261	0.272
666	646	Mitochondrial protein	Idh2	IDH2	§80	isocitrate dehydrogenase [NADP], mitochondrial precursor	P54071	http://www.phosphosite.org/proteinAction.do?id=9668&showAllSites=true	51	PHVDVQLK*YFDLGLP	LILPHVDVQLK*YFDLGLPNR	3	798.118	13481				13748		14268		13495				13755		14309		2.292				2.745		2.629		0.9057				0.5608		0.8676		0.158
667	647	Mitochondrial protein	Idh2	IDH2	§80	isocitrate dehydrogenase [NADP], mitochondrial precursor	P54071	http://www.phosphosite.org/proteinAction.do?id=9668&showAllSites=true	51	PHVDVQLK*YFDLGLP	LILPHVDVQLK*YFDLGLPNRDQTNDQVTIDSALATQK	5	845.05							13885								13924								4.371								1.1452
668	648	Mitochondrial protein	Mdh2	MDH2	§185	malate dehydrogenase, mitochondrial precursor	P08249	http://www.phosphosite.org/proteinAction.do?id=4264&showAllSites=true	36	NTFVAELK*GLDPARV	ANTFVAELK*GLDPAR	2	822.441					12455								12446								2.1								0.9766
669	649	Mitochondrial protein	Mdh2	MDH2	§239	malate dehydrogenase, mitochondrial precursor	P08249	http://www.phosphosite.org/proteinAction.do?id=4264&showAllSites=true	36	EAGTEVVK*AKAGAGS	IQEAGTEVVK*AK	2	657.867							3636								3627								3.373								0.3969
670	650	Mitochondrial protein	Mdh2	MDH2	§314	malate dehydrogenase, mitochondrial precursor	P08249	http://www.phosphosite.org/proteinAction.do?id=4264&showAllSites=true	36	KITPFEEK*MIAEAIP	ITPFEEK*M#IAEAIPELK	2	1009.03	12053		12107	12136		12243	12799	12731	12054		12143	12149		12246	12813	12767	2.409		2.447	2.539		2.077	2.312	2.256	1.2354		1.3311	1.2211		1.3167	1.401	0.9122	0.259		0.276	0.167
671	651	Mitochondrial protein	Mdh2	MDH2	§314	malate dehydrogenase, mitochondrial precursor	P08249	http://www.phosphosite.org/proteinAction.do?id=4264&showAllSites=true	36	KITPFEEK*MIAEAIP	ITPFEEK*M#IAEAIPELK	3	673.024					12287	12225		12748						12246		12767					1.981	4.372		4.187					1.1502	1.1556		0.9231
672	652	Mitochondrial protein	Ndufa10	NDUFA10	§122	NADH dehydrogenase [ubiquinone] 1 alpha subcomplex subunit 10, mitochondrial precursor	Q99LC3	http://www.phosphosite.org/proteinAction.do?id=7485&showAllSites=true	41	EKFYDDPK*SNDGNSY	FYDDPK*SNDGNSYR	2	860.366	4866	4764					5151	5259	4867	4756					5143	5273	3.553	2.88					3.947	3.494	-0.0484	0.8081					0.6907	0.065	0.522	0.456
673	653	Mitochondrial protein	Ndufa5	NDUFA5	§36	NADH dehydrogenase [ubiquinone] 1 alpha subcomplex subunit 5	Q9CPP6	http://www.phosphosite.org/proteinAction.do?id=12681&showAllSites=true	13	TKTLDILK*HFPKHAA	TLDILK*HFPK	3	418.58							9692																1.808								0.6493
674	654	Mitochondrial protein	Ndufa9	NUEM	§370	NADH dehydrogenase [ubiquinone] 1 alpha subcomplex subunit 9, mitochondrial precursor	Q9DC69	http://www.phosphosite.org/proteinAction.do?id=7913&showAllSites=true	43	SSEIEETK*PAKTVNY	WLSSEIEETK*PAK	2	780.401	7092	7041		7073	7199				7094	7042		7075	7192				3.026	4.194		3.566	2.91				0.7097	0.2436		0.4033	0.4481				0.352	0.372		0.333
675	655	Mitochondrial protein	Ndufv1	NDUFV1	§375	NADH dehydrogenase [ubiquinone] flavoprotein 1, mitochondrial precursor	Q91YT0	http://www.phosphosite.org/proteinAction.do?id=13223&showAllSites=true	51	ARLIEFYK*HESCGQC	LIEFYK*HESCGQCTPCR	3	742.996	5974	5929	5891	5926	6034	5988	6317	6414	5976	5931	5915	5953	6040	6002	6342	6427	3.98	3.991	3.308	3.204	4.066	3.924	3.947	3.718	1.018	0.4576	0.9879	0.974	1.3539	0.8833	0.8752	0.6058	0.442	0.317	0.365	0.318
676	656	Mitochondrial protein	Nipsnap1	NIPSNAP1	§146	protein NipSnap homolog 1	O55125	http://www.phosphosite.org/proteinAction.do?id=13897&showAllSites=true	33	MNKLKNNK*EYLEFRK	NNK*EYLEFR	2	627.809	7014	6941		6985	7097		7456		6995	6921					7453		2.312	2.229		1.66	1.74		2.091		0.2205	0.5234		0.796	0.8103		0.5106		0.15	0.151		0.02
677	657	Mitochondrial protein	Oxct1	OXCT1	271	succinyl-CoA:3-ketoacid-coenzyme A transferase 1, mitochondrial precursor	Q9D0K2	http://www.phosphosite.org/proteinAction.do?id=19739&showAllSites=true	56	IYVHRLIK*GEKYEKR	LIK*GEKYEK	3	383.889			1915								1914								2.019								0.1928								0.121
678	658	Mitochondrial protein	Oxct1	OXCT1	274	succinyl-CoA:3-ketoacid-coenzyme A transferase 1, mitochondrial precursor	Q9D0K2	http://www.phosphosite.org/proteinAction.do?id=19739&showAllSites=true	56	HRLIKGEK*YEKRIER	LIKGEK*YEK	2	575.329	1952		1894	1931	2000	1924	2189	2233	1971			1949	2006	1941	2208		2.648		1.776	2.574	2.119	2.578	1.984	1.948	0.0546		0.0815	0.2129	0.573	0.827	0.2998	-0.4595	0.234		0.054	0.116
679	659	Mitochondrial protein	Oxct1	OXCT1	274	succinyl-CoA:3-ketoacid-coenzyme A transferase 1, mitochondrial precursor	Q9D0K2	http://www.phosphosite.org/proteinAction.do?id=19739&showAllSites=true	56	HRLIKGEK*YEKRIER	LIKGEK*YEK	3	383.889		1942					2198	2252		1941						2245		2.023					2.115	2.294		-0.0925					-0.2299	-1.1206		0.152
680	660	Mitochondrial protein	Oxct1	OXCT1	406	succinyl-CoA:3-ketoacid-coenzyme A transferase 1, mitochondrial precursor	Q9D0K2	http://www.phosphosite.org/proteinAction.do?id=19739&showAllSites=true	56	LGAMQVSK*YGDLANW	GGHVNLTM#LGAM#QVSK*YGDLANWM#IPGK	3	1026.83		11531	11565	11593							11571	11577						2.151	2.041	2.698						1.5862	0.4197	0.1933						0.049	0.252	0.333
681	661	Mitochondrial protein	Oxr1; Oxr1; Oxr1	OXR1; OXR1 iso4; OXR1 iso5	132; 220; 213	oxidation resistance protein 1 isoform B	Q4KMM3-2; Q4KMM3-4; NP_001123637	http://www.phosphosite.org/proteinAction.do?id=9436&showAllSites=true	86; 93; 92	KFLKINCK*YITIGKG; KFLKINCK*YITIGKG; KFLKINCK*YITIGKG	INCK*YITIGK	2	626.342							6846	6941							6408	6493							2.546	2.797							-0.4411	0.071
682	662	Mitochondrial protein	Pdha1	PDHA1	267	pyruvate dehydrogenase E1 component subunit alpha, somatic form, mitochondrial precursor	P35486	http://www.phosphosite.org/proteinAction.do?id=1784&showAllSites=true	43	LCVREATK*FAAAYCR	EATK*FAAAYCR	2	665.316	5500						5843	5940	5514						5836	5943	2.435						2.229	2.543	-1.1832						-0.4041	-0.9177	0.312
683	663	Mitochondrial protein	Pdha1	PDHA1	§321	pyruvate dehydrogenase E1 component subunit alpha, somatic form, mitochondrial precursor	P35486	http://www.phosphosite.org/proteinAction.do?id=1784&showAllSites=true	43	SDPIMLLK*DRMVNSN	SKSDPIM#LLK*DR	2	730.893	7181																1.784								0.274								0.047
684	664	Mitochondrial protein	Pdha1	PDHA1	39	pyruvate dehydrogenase E1 component subunit alpha, somatic form, mitochondrial precursor	P35486	http://www.phosphosite.org/proteinAction.do?id=1784&showAllSites=true	43	NDATFEIK*KCDLHRL	FANDATFEIK*K	2	663.34				6875				7379												2.19				2.572				-1.1777				-2.2798				0.022
685	665	Mitochondrial protein	Pdha1	PDHA1	63	pyruvate dehydrogenase E1 component subunit alpha, somatic form, mitochondrial precursor	P35486	http://www.phosphosite.org/proteinAction.do?id=1784&showAllSites=true	43	LTREDGLK*YYRMMQT	EDGLK*YYR	2	543.267							5390								5396								1.766								-0.103
686	666	Mitochondrial protein	Pdha1; Pdha2	PDHA1; PDHA2	§77; §78	pyruvate dehydrogenase E1 component subunit alpha, somatic form, mitochondrial precursor	P35486; P35487	http://www.phosphosite.org/proteinAction.do?id=1784&showAllSites=true	43; 43	TVRRMELK*ADQLYKQ; VIRRMELK*ADQLYKQ	MELK*ADQLYK	2	640.831							7461								7464								1.982								0.2683
687	667	Mitochondrial protein	Pdha1; Pdha2	PDHA1; PDHA2	§77; §78	pyruvate dehydrogenase E1 component subunit alpha, somatic form, mitochondrial precursor	P35486; P35487	http://www.phosphosite.org/proteinAction.do?id=1784&showAllSites=true	43; 43	TVRRMELK*ADQLYKQ; VIRRMELK*ADQLYKQ	RMELK*ADQLYK	2	718.882							6064								6056								2.98								0.2663
688	668	Mitochondrial protein	Pdha1; Pdha2	PDHA1; PDHA2	§77; §78	pyruvate dehydrogenase E1 component subunit alpha, somatic form, mitochondrial precursor	P35486; P35487	http://www.phosphosite.org/proteinAction.do?id=1784&showAllSites=true	43; 43	TVRRMELK*ADQLYKQ; VIRRMELK*ADQLYKQ	RMELK*ADQLYK	3	479.59							6071																1.791								-0.0121
689	669	Mitochondrial protein	Pdha1; Pdha2	PDHA1; PDHA2	§83; §84	pyruvate dehydrogenase E1 component subunit alpha, somatic form, mitochondrial precursor	P35486; P35487	http://www.phosphosite.org/proteinAction.do?id=1784&showAllSites=true	43; 43	LKADQLYK*QKIIRGF; LKADQLYK*QKFIRGF	ADQLYK*QK	2	518.277		2453	2430		2541	2471				2450	2428		2547	2467				2.698	2.795		2.581	2.61				-0.7959	-0.6337		-0.5584	-0.4338				0.121	0.067
690	670	Mitochondrial protein	Scp2	SCP2	432	non-specific lipid-transfer protein	P32020	http://www.phosphosite.org/proteinAction.do?id=10623&showAllSites=true	59	SSAGDGFK*ANLVFKE	SSAGDGFK*ANLVFK	2	741.883		9309	9331	9356	9510		9980	9931		9319	9347	9352	9513		9994	9936		3.847	3.739	2.932	3.181		3.414	3.653		0.7197	0.7291	0.3009	0.8013		0.4566	0.0938		0.339	0.458	0.357
691	671	Mitochondrial protein	Scp2	SCP2	§438	non-specific lipid-transfer protein	P32020	http://www.phosphosite.org/proteinAction.do?id=10623&showAllSites=true	59	FKANLVFK*EIEKKLE	ANLVFK*EIEK	2	616.848				8410		8484	8936					8406		8499	8949					2.116		2.385	2.019					0.6481		-0.0455	0.0997					0.128
692	672	Mitochondrial protein	Sdha	SDHA	167	succinate dehydrogenase [ubiquinone] flavoprotein subunit, mitochondrial precursor	Q8K2B3	http://www.phosphosite.org/proteinAction.do?id=10557&showAllSites=true	73	FSRTEDGK*IYQRAFG	TEDGK*IYQR	2	576.288			2943		3063						2625		2745						2.298		2.075						-1.3028		0.427						0.171
693	673	Mitochondrial protein	Sdha	SDHA	§608	succinate dehydrogenase [ubiquinone] flavoprotein subunit, mitochondrial precursor	Q8K2B3	http://www.phosphosite.org/proteinAction.do?id=10557&showAllSites=true	73	VDEYDYSK*PIQGQQK	VDEYDYSK*PIQGQQK	3	613.963					5277	5241							5303	5232							2.888	1.958							1.4612	0.8791
694	674	Mitochondrial protein	Sdha	SDHA	§608	succinate dehydrogenase [ubiquinone] flavoprotein subunit, mitochondrial precursor	Q8K2B3	http://www.phosphosite.org/proteinAction.do?id=10557&showAllSites=true	73	VDEYDYSK*PIQGQQK	VRVDEYDYSK*PIQGQQK	3	699.02						5349	5653	5751														2.864	2.597	2.138						-0.1019	0.5496	-0.0694
695	675	Mitochondrial protein	Sod2	SOD2	§130	superoxide dismutase [Mn], mitochondrial precursor	P09671	http://www.phosphosite.org/proteinAction.do?id=10597&showAllSites=true	25	RDFGSFEK*FKEKLTA	DFGSFEK*FKEK	2	702.346	7517	7481	7460	7498					7523	7460	7455	7493					3.022	2.666	2.617	2.696					0.208	-0.1539	-0.1895	-0.2344					0.349	0.241	0.261	0.232
696	676	Mitochondrial protein	Sod2	SOD2	§68	superoxide dismutase [Mn], mitochondrial precursor	P09671	http://www.phosphosite.org/proteinAction.do?id=10597&showAllSites=true	25	NLNATEEK*YHEALAK	HHAAYVNNLNATEEK*YHEALAK	4	642.067	6179		6094	6153	6254			6578	6163		6080	6151	6260			6625	2.767		2.556	3.325	3.216			2.533	0.176		0.5709	0.7487	0.7518			0.4551	0.116		0.03	0.223
697	677	Mitochondrial protein	Sucla2	SCS-beta	§88	succinyl-CoA ligase [ADP-forming] subunit beta, mitochondrial precursor	Q9Z2I9	http://www.phosphosite.org/proteinAction.do?id=4333&showAllSites=true	50	DEAYAIAK*KLGSKDV	SSDEAYAIAK*K	2	612.809				3998			4358	4453				3984			4351	4452				2.614			3.129	3.321				0.767			1.208	-0.5771				0.193
698	678	Mitochondrial protein	Uqcrb	UQCRB	§83	cytochrome b-c1 complex subunit 7	Q9D855	http://www.phosphosite.org/proteinAction.do?id=15763&showAllSites=true	14	LPKDQWTK*YEEDKFY	DQWTK*YEEDKFYLEPYLK	3	813.058			12260								12253								2.624								1.3329								0.112
699	679	Mitochondrial protein	Uqcrb	UQCRB	§88	cytochrome b-c1 complex subunit 7	Q9D855	http://www.phosphosite.org/proteinAction.do?id=15763&showAllSites=true	14	WTKYEEDK*FYLEPYL	DQWTKYEEDK*FYLEPYLK	3	813.058	12203								12208								2.919								1.2467								0.118
700	680	Mitochondrial protein	Uqcrh	UQCRHL	§83	cytochrome b-c1 complex subunit 6, mitochondrial	P99028	http://www.phosphosite.org/proteinAction.do?id=9612&showAllSites=true	10	RDHCVAHK*LFKNLK-	DHCVAHK*LFK	3	432.889								4390																1.969								-0.6636
701	Phosphatase
702	681	Phosphatase	Nt5m	NT5M	129	5(3)-deoxyribonucleotidase, mitochondrial precursor	Q8VCE6	http://www.phosphosite.org/proteinAction.do?id=7580526&showAllSites=true	26	TSPIKMFK*YCPYEKY	MFK*YCPYEK	2	654.294	6455							6954	6424							6944	1.976							2.281	0.9915							0.0102	0.158
703	682	Phosphatase	Nt5m	NT5M	129	5(3)-deoxyribonucleotidase, mitochondrial precursor	Q8VCE6	http://www.phosphosite.org/proteinAction.do?id=7580526&showAllSites=true	26	TSPIKMFK*YCPYEKY	M#FK*YCPYEK	2	662.291		5424								5414								2.172								0.5559								0.162
704	683	Phosphatase	Pgam1; Pgam2	PGAM1; PGAM2	§100; §100	phosphoglycerate mutase 1	Q9DBJ1; O70250	http://www.phosphosite.org/proteinAction.do?id=4427&showAllSites=true	29; 29	GGLTGLNK*AETAAKH; GGLTGLNK*AETAAKH	HYGGLTGLNK*AETAAK	2	836.936	5161	5062	5065	5098	5203	5138	5466	5566	5184	5086	5101	5117	5218	5155	5473	5581	3.895	4.354	4.325	4.643	4.453	4.082	4.479	4.93	0.4022	0.4482	0.652	0.609	0.2904	0.5026	0.5498	0.117	0.411	0.389	0.38	0.45
705	684	Phosphatase	Pgam1; Pgam2	PGAM1; PGAM2	§100; §100	phosphoglycerate mutase 1	Q9DBJ1; O70250	http://www.phosphosite.org/proteinAction.do?id=4427&showAllSites=true	29; 29	GGLTGLNK*AETAAKH; GGLTGLNK*AETAAKH	HYGGLTGLNK*AETAAK	3	558.293		5066	5104	5142						5086	5079	5117						2.996	3.386	3.276						0.215	0.2121	0.4625						0.2	0.31	0.286
706	685	Phosphatase	Ppp2ca; Ppp2cb	PPP2CA; PPP2CB	136; 136	serine/threonine-protein phosphatase 2A catalytic subunit alpha isoform	P63330; P62715	http://www.phosphosite.org/proteinAction.do?id=1686&showAllSites=true	36; 36	FYDECLRK*YGNANVW; FYDECLRK*YGNANVW	K*YGNANVWK	2	561.291							4985								4978								2.038								0.1849
707	686	Phosphatase	Ppp5c	PPP5C	135	serine/threonine-protein phosphatase 5	Q60676	http://www.phosphosite.org/proteinAction.do?id=1378&showAllSites=true	57	NDKDAKMK*YQECSKI	MK*YQECSK	2	558.247	1976	1946	1908			1935	2211	2259	1982	1941	1914			1930	2219	2266	2.08	2.084	2.306			2.437	2.161	2.314	0.362	0.1477	0.0097			0.4131	0.0823	0.076	0.241	0.318	0.389
708	687	Phosphatase	Sbf1	MTMR5	992	myotubularin-related protein 5 isoform 2	Q6ZPE2	http://www.phosphosite.org/proteinAction.do?id=13789&showAllSites=true	209	SCTFQLLK*MAFDEEV	SCTFQLLK*M#AFDEEVGSDSAELFRK	3	989.468			15437																2.501								-1.6383								0.115
709	688	Phosphatase	Wbp11	WBP11	§13	WW domain-binding protein 11	Q923D5	http://www.phosphosite.org/proteinAction.do?id=7742&showAllSites=true	70	TSSTKSGK*FMNPTDQ	SGK*FMNPTDQAR	2	697.33	4788	4699		4740		4769	5076	5184	4779	4701		4732		4782	5110	5207	3.394	3.385		3.102		2.991	4.045	3.106	0.2844	0.5556		1.228		0.6109	0.293	0.2665	0.332	0.395		0.398
710	689	Phosphatase	Wbp11	WBP11	§13	WW domain-binding protein 11	Q923D5	http://www.phosphosite.org/proteinAction.do?id=7742&showAllSites=true	70	TSSTKSGK*FMNPTDQ	SGK*FM#NPTDQAR	2	705.327								4003								4015								3.348								-0.0044
711	Protease
712	690	Protease	Egfbp2	Egfbp2	147	epidermal growth factor-binding protein type B precursor	P36368	http://www.phosphosite.org/proteinAction.do?id=5141684&showAllSites=true	29	ALPTKEPK*PGSKCLA	EPK*PGSKCLASG	3	424.88			6501																1.857								-0.2859								0.065
713	691	Protease	Lactb	LACTB	§346	serine beta-lactamase-like protein LACTB, mitochondrial precursor	Q9EP89	http://www.phosphosite.org/proteinAction.do?id=10157&showAllSites=true	61	VERASGYK*YLDYMQK	ASGYK*YLDYM#QK	2	762.856	6388	6308	6297	6333		6406	6767	6843	6402	6349	6322	6371			6793		2.361	2.884	3.063	2.673		2.77	3.14	2.846	-0.8121	-1.1269	-1.4181	-0.7865		-1.3735	-1.5683	-1.7401	0.032	0.294	0.277	0.229
714	692	Protease	Pcsk2	PCSK2	417	neuroendocrine convertase 2 precursor	P21661	http://www.phosphosite.org/proteinAction.do?id=10194&showAllSites=true	71	HLTVLTSK*RNQLHDE	HLTVLTSK*R	2	548.827								6143																2.054								-0.3966
715	693	Protease	Pitrm1	PITRM1	770	presequence protease, mitochondrial precursor	Q8K411	http://www.phosphosite.org/proteinAction.do?id=23850&showAllSites=true	117	RKLPRIKK*YLLNCDN	K*YLLNCDNMR	2	684.824	6334	6291	6272	6314	6409	6373	6736		6347	6283	6278	6294	6400	6354	6727		2.766	2.834	3.385	3.025	2.675	3.3	2.364		-0.3004	-0.2112	0.5099	0.8153	-0.2032	0.4829	0.3068		0.221	0.241	0.317	0.29
716	694	Protease	Pitrm1	PITRM1	770	presequence protease, mitochondrial precursor	Q8K411	http://www.phosphosite.org/proteinAction.do?id=23850&showAllSites=true	117	RKLPRIKK*YLLNCDN	K*YLLNCDNM#R	2	692.821	4886			4812					4878			4820					2.93			2.573					1.3695			0.7217					0.205			0.214
717	695	Protease	Pitrm1	PITRM1	§945	presequence protease, mitochondrial precursor	Q8K411	http://www.phosphosite.org/proteinAction.do?id=23850&showAllSites=true	117	VDWAKSGK*FTQQDID	SGK*FTQQDIDEAK	2	754.865		4698	4679				5087	5183		4690	4672				5077	5185		2.69	2.805				2.643	2.399		0.3504	1.3247				-0.1646	0.0621		0.118	0.186
718	696	Protease	Psma5	PSMA5	91	proteasome subunit alpha type-5	Q9Z2U1	http://www.phosphosite.org/proteinAction.do?id=11024&showAllSites=true	26	DAKTLIDK*ARVETQN	TLIDK*AR	2	429.756		4010																1.683								0.0185								0.053
719	697	Protease	Psma6	PSMA6	§104	proteasome subunit alpha type-6	Q9QUM9	http://www.phosphosite.org/proteinAction.do?id=8079&showAllSites=true	27	EAANWKYK*YGYEIPV	YK*YGYEIPVDM#LCK	2	918.931	9223	9185	9208	9224	9378	9330	9814	9762	9261	9209	9237	9242	9403	9357	9818	9771	4.313	2.853	3.288	3.016	3.342	3.775	3.915	4.139	0.7091	0.9927	1.0929	0.8566	0.7772	0.7309	0.8408	0.5888	0.504	0.473	0.424	0.43
720	698	Protease	Psma6	PSMA6	§104	proteasome subunit alpha type-6	Q9QUM9	http://www.phosphosite.org/proteinAction.do?id=8079&showAllSites=true	27	EAANWKYK*YGYEIPV	YK*YGYEIPVDM#LCKR	3	664.99	8119	8048	8063	8100	8217	8193		8545	8106	8087	8071	8087	8215	8191		8594	2.449	1.962	2.486	2.414	2.553	2.428		2.798	0.3575	0.5412	0.5863	0.6616	0.3103	0.5266		-0.1859	0.253	0.15	0.255	0.192
721	699	Protease	Psma6	PSMA6	§181	proteasome subunit alpha type-6	Q9QUM9	http://www.phosphosite.org/proteinAction.do?id=8079&showAllSites=true	27	ESTSFLEK*KVKKKFD	QTESTSFLEK*K	2	670.341	5403						5744		5393						5715		2.027						2.559		0.1148						0.2827		0.046
722	700	Protease	Psmc6	RPT4	§206	26S protease regulatory subunit 10B	P62334	http://www.phosphosite.org/proteinAction.do?id=8085&showAllSites=true	44	VSSSIVDK*YIGESAR	VVSSSIVDK*YIGESAR	2	876.462	9460			9494		9582	10055	10004	9470			9451		9566	10060	10035	3.063			2.696		2.998	3.536	4.277	0.8708			1.513		1.2458	1.0324	0.9399	0.168			0.228
723	701	Protease	Psmc6	RPT4	§206	26S protease regulatory subunit 10B	P62334	http://www.phosphosite.org/proteinAction.do?id=8085&showAllSites=true	44	VSSSIVDK*YIGESAR	VVSSSIVDK*YIGESAR	3	584.644	9442	9400		9423		9538		10026	9459			9451		9566		10013	3.342	2.337		2.788		3.091		3.462	0.4387	0.7013		0.6825		0.5272		0.6065	0.256	0.013		0.167
724	702	Protease	Psmd12	PSMD12	§368	26S proteasome non-ATPase regulatory subunit 12	Q9D8W5	http://www.phosphosite.org/proteinAction.do?id=14892&showAllSites=true	53	HNIRIMAK*YYTRITM	IMAK*YYTR	2	544.284							5053																1.958								-0.0678
725	703	Protease	Uchl1	UCHL1	135	ubiquitin carboxyl-terminal hydrolase isozyme L1	Q9R0P9	http://www.phosphosite.org/proteinAction.do?id=9334&showAllSites=true	25	DRAKCFEK*NEAIQAA	CFEK*NEAIQAAHDSVAQEGQCR	3	864.052	7177	7160	7140	7125	7250	7209	7558	7617	7204	7119	7114	7152	7269	7245	7585	7670	5.538	5.448	5.822	5.184	5.603	5.22	5.28	5.631	0.8812	0.7774	0.7438	0.8468	0.3056	0.472	0.7283	0.4955	0.555	0.53	0.604	0.493
726	704	Protease	Uchl1	UCHL1	135	ubiquitin carboxyl-terminal hydrolase isozyme L1	Q9R0P9	http://www.phosphosite.org/proteinAction.do?id=9334&showAllSites=true	25	DRAKCFEK*NEAIQAA	CFEK*NEAIQAAHDSVAQEGQCR	3	864.052	7167	7100	7085	7205		7200	7546		7204	7119	7114	7152		7245	7585		4.814	4.846	5.646	4.588		4.183	4.088		0.8812	0.7774	0.7125	0.8468		0.472	0.7283		0.467	0.471	0.497	0.503
727	705	Protease	Uchl1	UCHL1	71	ubiquitin carboxyl-terminal hydrolase isozyme L1	Q9R0P9	http://www.phosphosite.org/proteinAction.do?id=9334&showAllSites=true	25	KKQIEELK*GQEVSPK	QIEELK*GQEVSPK	2	763.907	4937	4865	4871	4892	4987	4938	5254	5341	4966	4899	4903	4930	5032	4958	5275	5372	3.632	3.547	3.489	3.637	3.255	3.715	2.897	2.962	0.5842	0.3419	0.6098	0.7152	0.5534	0.6641	0.1067	-0.0432	0.395	0.373	0.417	0.43
728	706	Protease	Uchl1	UCHL1	71	ubiquitin carboxyl-terminal hydrolase isozyme L1	Q9R0P9	http://www.phosphosite.org/proteinAction.do?id=9334&showAllSites=true	25	KKQIEELK*GQEVSPK	QIEELK*GQEVSPK	2	763.907				4976								4930								2.981								0.7152								0.345
729	707	Protease	Uchl1	UCHL1	71	ubiquitin carboxyl-terminal hydrolase isozyme L1	Q9R0P9	http://www.phosphosite.org/proteinAction.do?id=9334&showAllSites=true	25	KKQIEELK*GQEVSPK	QIEELK*GQEVSPK	3	509.607	4951	4882	4868	4906	5009	4932	5269	5357	4955	4910	4881	4930	5021	4947	5275	5383	3.874	3.277	3.99	3.917	3.541	3.913	4.136	4.214	0.2613	0.0904	0.1015	0.3903	0.2004	0.3864	-0.1461	-0.0688	0.218	0.256	0.247	0.301
730	708	Protease	Uchl5	UCHL5	§158	ubiquitin carboxyl-terminal hydrolase isozyme L5 isoform 2	Q9WUP7	http://www.phosphosite.org/proteinAction.do?id=9233&showAllSites=true	38	FDTKTPAK*EEDAFHF	TPAK*EEDAFHFVSYVPVNGR	3	769.046	9939	9925	9940	9951	10111	10058	10527	10501	9954	9970	9985	10000	10147	10094	10566	10530	4.941	4.437	4.633	4.021	4.346	4.516	3.411	4.35	0.625	0.8913	0.6584	0.6319	0.9208	0.4532	1.0393	0.3261	0.375	0.388	0.463	0.305
731	709	Protease	Uchl5	UCHL5	§158	ubiquitin carboxyl-terminal hydrolase isozyme L5 isoform 2	Q9WUP7	http://www.phosphosite.org/proteinAction.do?id=9233&showAllSites=true	38	FDTKTPAK*EEDAFHF	TPAK*EEDAFHFVSYVPVNGR	3	769.046			10024								9985								3.742								0.6432								0.288
732	710	Protease	Usp5	USP5	353	ubiquitin carboxyl-terminal hydrolase 5	P56399	http://www.phosphosite.org/proteinAction.do?id=6591&showAllSites=true	96	SIPDFQRK*YVDKLEK	K*YVDKLEK	2	532.803			2561								2570								2.112								-0.4983								0.122
733	Protein kinase
734	711	Protein kinase	Gm4922	EG237300	345	sperm motility kinase Z	Q8C0N0	http://www.phosphosite.org/proteinAction.do?id=5142397&showAllSites=true	56	DGNYVQTK*LMNPGMP	DGNYVQTK*LM#NPGM#PPFPSVTDSGAFSLPPRR	4	888.433							13673																2.885								1.1101
735	Protein kinase, Ser/Thr (non-receptor)
736	712	Protein kinase, Ser/Thr (non-receptor)	Camk2a; Camk2b; Camk2b; Camk2d; Camk2d; Camk2g; Camk2g	CaMK2-alpha; CaMK2-beta; CaMK2-beta iso3; CaMK2-delta; CaMK2-delta iso5; CaMK2-gamma; CaMK2-gamma iso3	56; 57; 57; 57; 57; 57; 57	calcium/calmodulin-dependent protein kinase type II subunit alpha isoform 1	P11798; P28652; Q5SVJ0; Q6PHZ2; Q6PHZ2-5; Q923T9; Q923T9-3	http://www.phosphosite.org/proteinAction.do?id=1433&showAllSites=true	54; 60; 73; 56; 58; 60; 56	LSARDHQK*LEREARI; LSARDHQK*LEREARI; LSARDHQK*LEREARI; LSARDHQK*LEREARI; LSARDHQK*LEREARI; LSARDHQK*LEREARI; LSARDHQK*LEREARI	DHQK*LER	2	484.251			1493																1.685								-0.3259								0.031
737	713	Protein kinase, Ser/Thr (non-receptor)	Camk2b; Camk2b; Camk2b	CaMK2-beta; CaMK2-beta iso2; CaMK2-beta iso3	268; 139; 268	calcium/calmodulin-dependent protein kinase type II subunit beta isoform 1	P28652; Q3TY93; Q5SVJ0	http://www.phosphosite.org/proteinAction.do?id=5321&showAllSites=true	60; 42; 73	ITAHEALK*HPWVCQR; ITAHEALK*HPWVCQR; ITAHEALK*HPWVCQR	ITAHEALK*HPWVCQR	3	629.993								5720								5757								2.26								1.019
738	714	Protein kinase, Ser/Thr (non-receptor)	Camk2b; Camk2b	CaMK2-beta; CaMK2-beta iso3	33; 33	calcium/calmodulin-dependent protein kinase type II subunit beta isoform 1	P28652; Q5SVJ0	http://www.phosphosite.org/proteinAction.do?id=5321&showAllSites=true	60; 73	SVVRRCVK*LCTGHEY; SVVRRCVK*LCTGHEY	CVK*LCTGHEYAAK	3	526.918			3205	3220							3212	3207							2.187	1.93							0.1277	0.1264							0.15	0.076
739	715	Protein kinase, Ser/Thr (non-receptor)	Camk2b; Camk2b	CaMK2-beta; CaMK2-beta iso3	33; 33	calcium/calmodulin-dependent protein kinase type II subunit beta isoform 1	P28652; Q5SVJ0	http://www.phosphosite.org/proteinAction.do?id=5321&showAllSites=true	60; 73	SVVRRCVK*LCTGHEY; SVVRRCVK*LCTGHEY	RCVK*LCTGHEYAAK	3	578.952								2794								2797								2.7								0.1479
740	716	Protein kinase, Ser/Thr (non-receptor)	Cdk5	CDK5	§56	cyclin-dependent kinase 5	P49615	http://www.phosphosite.org/proteinAction.do?id=1453&showAllSites=true	33	LREICLLK*ELKHKNI	EICLLK*ELK	2	594.339	10047								10075								2.236								0.0773								0.032
741	717	Protein kinase, Ser/Thr (non-receptor)	Eif2ak4	GCN2	§1258	eukaryotic translation initiation factor 2-alpha kinase 4 isoform 2	Q9QZ05	http://www.phosphosite.org/proteinAction.do?id=979&showAllSites=true	186	NSLCRLYK*FIEQKGD	LYK*FIEQK	2	555.813				6798								6789								1.864								0.3828								0.075
742	718	Protein kinase, Ser/Thr (non-receptor)	Mapkapk3	MAPKAPK3	257	MAP kinase-activated protein kinase 3	Q3UMW7	http://www.phosphosite.org/proteinAction.do?id=3512&showAllSites=true	43	QAISPGMK*RRIRLGQ	YSNTGQAISPGM#K*R	3	523.256	6304																1.942								-0.9357								0.023
743	719	Protein kinase, Ser/Thr (non-receptor)	Smg1	SMG1	§171	serine/threonine-protein kinase SMG1	Q8BKX6	http://www.phosphosite.org/proteinAction.do?id=11243&showAllSites=true	410	LATVKQLK*EFIQQPE	QLK*EFIQQPENK	2	772.409	6477	6412	6392	6430		6505	6856	6940	6435	6404	6388	6426		6486	6859	6922	2.431	3.033	3.244	2.45		3.455	2.794	2.885	1.0113	0.999	0.9465	0.7023		0.8468	0.0798	-0.0899	0.111	0.188	0.203	0.168
744	720	Protein kinase, Ser/Thr (non-receptor)	Trrap	TRRAP	§2524	transformation/transcription domain-associated protein	Q80YV3	http://www.phosphosite.org/proteinAction.do?id=9915&showAllSites=true	436	FAMVTHVK*QEPRERE	AAFAMVTHVK*QEPR	3	542.952			6039	6094								6096							2.014	2.543							1.1013	0.9335							0.054	0.188
745	Protein kinase, Tyr (non-receptor)
746	721	Protein kinase, Tyr (non-receptor)	Jak2	JAK2	640, 642	tyrosine-protein kinase JAK2	Q62120	http://www.phosphosite.org/proteinAction.do?id=1639&showAllSites=true	130	SLDTYLKK*NKNSINI, DTYLKKNK*NSINILW	LKK*NK*NSINILWK	3	561.67				12783																2.639								0.8187								0.024
747	Protein kinase, dual-specificity
748	722	Protein kinase, dual-specificity	Clk4	CLK4	403	dual specificity protein kinase CLK4	O35493	http://www.phosphosite.org/proteinAction.do?id=1813&showAllSites=true	57	IPAHMIQK*TRKRKYF	EHLAMMERILGPIPAHMIQK*	3	786.414							4993																2.038								-0.6779
749	Protein kinase, regulatory subunit
750	723	Protein kinase, regulatory subunit	Dnajc3	DNAJC3	117	dnaJ homolog subfamily C member 3 precursor	Q91YW3	http://www.phosphosite.org/proteinAction.do?id=19769&showAllSites=true	57	QRGHLLLK*QGKLDEA	HLLLK*QGK	2	489.808		3815			3932													2.518			2.411					-0.0489			0.1013					0.168
751	RNA processing
752	724	RNA processing	A1cf	ACF	511	APOBEC1 complementation factor	Q5YD48	http://www.phosphosite.org/proteinAction.do?id=16078&showAllSites=true	66	SAYVDEAK*RYAAEHT	LSAYVDEAK*R	2	597.312								9767																1.186								-1.841
753	725	RNA processing	Cpsf6	CPSF6	185	cleavage and polyadenylation specificity factor subunit 6	Q6NVF9	http://www.phosphosite.org/proteinAction.do?id=7672&showAllSites=true	59	GQMSGEGK*AGPPGGG	KTTQSGQMSGEGK*AGPPGGGSR	3	706.34	1890			1873		1852	2107	2157	1884			1863		1834	2100	2147	3.944			2.858		2.861	3.853	2.538	-0.2992			-0.618		-0.5443	0.4051	-0.1688	0.352			0.268
754	726	RNA processing	Ddx1	DDX1	§281	ATP-dependent RNA helicase DDX1	Q91VR5	http://www.phosphosite.org/proteinAction.do?id=10267&showAllSites=true	83	NAQVSQTK*FLPNAPK	SQHTGNAQVSQTK*FLPNAPK	3	732.378		5283	5290	5301	5429	5360	5668	5786		5284	5299	5337	5402	5375	5660	5757		3.826	3.506	2.47	3.001	3.07	3.535	3.708		0.5646	0.1236	0.8698	0.4124	0.3732	0.3012	0.0142		0.312	0.402	0.127
755	727	RNA processing	Eif4a1	eIF4A1	§174	eukaryotic initiation factor 4A-I isoform 2	P60843	http://www.phosphosite.org/proteinAction.do?id=8032&showAllSites=true	46	NRRYLSPK*YIKMFVL	YLSPK*YIK	2	527.303	5715																1.991								0.3472								0.021
756	728	RNA processing	Fen1	FEN1	§375	flap endonuclease 1	Q8C5X6	http://www.phosphosite.org/proteinAction.do?id=12263&showAllSites=true	46	AKTGGAGK*FRRGKIN	TGGAGK*FR	2	418.225	2335		2243	2302	2343	2272	2602	2689	2334		2263	2300	2360	2291	2610	2687	2.697		2.518	2.48	2.657	2.267	2.526	2.656	-1.828		-1.1158	0.7694	-1.4725	-0.9159	0.8017	-0.1152	0.202		0.131	0.198
757	729	RNA processing	Ftsjd2	FTSJD2	§107	cap-specific mRNA (nucleoside-2-O-)-methyltransferase 1	Q9DBC3	http://www.phosphosite.org/proteinAction.do?id=16909&showAllSites=true	96	REGEGLGK*YSQGRKD	EGEGLGK*YSQGR	2	661.82	3931	3836		3850	3964		4228	4354	3948	3832		3841	3959		4219	4342	2.438	2.665		2.618	2.856		2.779	2.5	0.0473	0.2673		0.6061	0.0693		-0.1424	-0.0736	0.37	0.335		0.335
758	730	RNA processing	Hnrnpa1; Hnrnpa1	hnRNP A1; hnRNP A1 iso2	§298; §351	heterogeneous nuclear ribonucleoprotein A1 isoform b	P49312; Q5EBP8	http://www.phosphosite.org/proteinAction.do?id=2809&showAllSites=true	34; 39	GGGQYFAK*PRNQGGY; GGGQYFAK*PRNQGGY	SSGPYGGGGQYFAK*PR	2	835.9	6365	6302	6291	6418	6439	6489	6748	6827	6413	6371	6333	6371	6488	6453	6793	6878	4.026	4.07	4.354	4.137	4.287	4.241	4.131	3.826	0.5768	0.4954	0.5918	0.6576	0.499	0.4355	0.2901	0.0339	0.552	0.457	0.527	0.5
759	731	RNA processing	Hnrnpa1; Hnrnpa1	hnRNP A1; hnRNP A1 iso2	§298; §351	heterogeneous nuclear ribonucleoprotein A1 isoform b	P49312; Q5EBP8	http://www.phosphosite.org/proteinAction.do?id=2809&showAllSites=true	34; 39	GGGQYFAK*PRNQGGY; GGGQYFAK*PRNQGGY	SSGPYGGGGQYFAK*PR	2	835.9	6462	6395	6393	6322	6534	6393	6841	6925	6413	6371	6333	6371	6488	6453	6793	6878	3.926	3.902	3.881	3.908	3.991	3.949	3.794	3.386	0.5756	0.4906	0.6061	0.6869	0.4846	0.4619	0.2793	0.0375	0.475	0.549	0.457	0.513
760	732	RNA processing	Hnrnpa1; Hnrnpa1	hnRNP A1; hnRNP A1 iso2	§298; §351	heterogeneous nuclear ribonucleoprotein A1 isoform b	P49312; Q5EBP8	http://www.phosphosite.org/proteinAction.do?id=2809&showAllSites=true	34; 39	GGGQYFAK*PRNQGGY; GGGQYFAK*PRNQGGY	SSGPYGGGGQYFAK*PR	3	557.602	6394		6314	6385	6456	6443	6795		6413		6333	6371	6488	6453	6782		2.881		4.192	4.053	3.974	3.789	3.712		0.2787		0.4804	0.5469	0.414	0.4637	0.3739		0.148		0.331	0.257
761	733	RNA processing	Hnrnpd; Hnrnpd	hnRNP D0; hnRNP D0 iso3	§197; §197	heterogeneous nuclear ribonucleoprotein D0 isoform a	Q60668; Q60668-3	http://www.phosphosite.org/proteinAction.do?id=3375&showAllSites=true	38; 33	SPDTPEEK*IREYFGG; SPDTPEEK*IREYFGG	IFVGGLSPDTPEEK*IR	2	900.481		9175	9189							9176	9160							2.772	3.832							0.8768	0.989							0.2	0.347
762	734	RNA processing	Hnrnpl; Hnrnpl	hnRNP L; hnRNP L iso3	§472; §478	heterogeneous nuclear ribonucleoprotein L	Q8R081; Q3UMT7	http://www.phosphosite.org/proteinAction.do?id=8886&showAllSites=true	64; 64	EDGSCSYK*DFSESRN; EDGSCSYK*DFSESRN	QPAIM#PGQSYGLEDGSCSYK*DFSESR	3	989.764	8670	8620	8625	8655	8772	8759	9164	9159	8689	8626	8643	8703	8798	8796	9202	9188	5.19	5.859	5.721	4.148	5.05	4.43	6.17	4.524	1.2677	1.1788	1.5518	1.2829	0.8768	1.1276	1.017	1.0881	0.619	0.639	0.632	0.484
763	735	RNA processing	Hnrnpl; Hnrnpl	hnRNP L; hnRNP L iso3	§472; §478	heterogeneous nuclear ribonucleoprotein L	Q8R081; Q3UMT7	http://www.phosphosite.org/proteinAction.do?id=8886&showAllSites=true	64; 64	EDGSCSYK*DFSESRN; EDGSCSYK*DFSESRN	QPAIM#PGQSYGLEDGSCSYK*DFSESR	3	989.764			8629								8643								4.449								1.5518								0.438
764	736	RNA processing	Khdrbs1	Sam68	252	KH domain-containing, RNA-binding, signal transduction-associated protein 1	Q60749	http://www.phosphosite.org/proteinAction.do?id=3643&showAllSites=true	48	AHAMEEVK*KFLVPDM	AMEEVK*K	2	438.728						1921																1.956								-0.0392
765	737	RNA processing	Lrpprc	LRPPRC	§462	leucine-rich PPR motif-containing protein, mitochondrial precursor	Q6PB66	http://www.phosphosite.org/proteinAction.do?id=7779&showAllSites=true	157	QGIIDILK*IMNKVGV	NVQGIIDILK*IM#NK	3	552.983	12464		12538	12551	12745	12662	13269	13206	12461		12528	12556	12743	12642		13207	2.495		3.277	3.603	3.63	3.803	2.358	2.843	0.4351		0.5655	0.315	0.9698	0.6071	0.1961	0.0012	0.204		0.187	0.211
766	738	RNA processing	Matr3	matrin 3	§473	matrin-3	Q8K310	http://www.phosphosite.org/proteinAction.do?id=8696&showAllSites=true	95	VRVHLSQK*YKRIKKP	VHLSQK*YK	2	522.795							2593																1.534								-0.0757
767	739	RNA processing	Matr3	matrin 3	§522	matrin-3	Q8K310	http://www.phosphosite.org/proteinAction.do?id=8696&showAllSites=true	95	KLAEPYGK*IKNYILM	LAEPYGK*IK	2	530.806					5040																1.795								-0.0932
768	740	RNA processing	Matr3	matrin 3	624	matrin-3	Q8K310	http://www.phosphosite.org/proteinAction.do?id=8696&showAllSites=true	95	TESPAEGK*EQEEKSG	TESPAEGK*EQEEK	2	752.344			1902	1955								1949							1.501	2.669							0.3458	1.4537							0.21	0.344
769	741	RNA processing	Nop2	Nop2	733	putative ribosomal RNA methyltransferase NOP2	NP_620086	http://www.ncbi.nlm.nih.gov/entrez/query.fcgi?db=protein&cmd=search&term=NP_620086	87	APSLGEAK*KKQKGKQ	RAAPRPKDCAPSLGEAK*K	3	665.358					11454																2.276								0.8013
770	742	RNA processing	Nova2	NOVA2	191	neuro-oncological ventral antigen 2	NP_001025048	http://www.phosphosite.org/proteinAction.do?id=6142608&showAllSites=true	49	GEPEQVHK*AVSAIVQ	K*AVSAIVQK	2	493.306						2037																2.106								-0.7053
771	743	RNA processing	Npm1	NPM1	§154	nucleophosmin	Q61937	http://www.phosphosite.org/proteinAction.do?id=1394&showAllSites=true	33	GGNKVPQK*KVKLDED	SAPGGGNKVPQK*K	2	655.365	1542	1518	1491		1577		1709	1752	1534	1513	1495		1567		1705	1742	2.465	2.448	2.622		2.133		2.365	2.653	0.3361	0.5125	0.5865		0.6079		-0.4168	-0.2014	0.231	0.191	0.329
772	744	RNA processing	Npm1	NPM1	§211	nucleophosmin	Q61937	http://www.phosphosite.org/proteinAction.do?id=1394&showAllSites=true	33	QKSNQNGK*DLKPSTP	SNQNGK*DLKPSTPR	2	792.41	2075	2033	2018	2062	2104		2299		2079	2068	2022	2069	2144		2307		3.138	3.248	2.772	3.559	2.731		4.066		0.632	0.3896	0.7532	0.2986	0.5221		0.1875		0.199	0.35	0.217	0.259
773	745	RNA processing	Npm1	NPM1	§211	nucleophosmin	Q61937	http://www.phosphosite.org/proteinAction.do?id=1394&showAllSites=true	33	QKSNQNGK*DLKPSTP	SNQNGK*DLKPSTPR	3	528.609		2020	2024	2065	2095			2371		2066	2022	2064	2105			2358		3.63	2.869	3.32	2.63			3.079		-0.3315	-0.2892	-0.1326	-0.0865			-0.3751		0.163	0.299	0.247
774	746	RNA processing	Npm1	NPM1	§227	nucleophosmin	Q61937	http://www.phosphosite.org/proteinAction.do?id=1394&showAllSites=true	33	SKGQESFK*KQEKTPK	SKGQESFK*K	2	540.788	1528	1498	1471	1493						1491		1489					2.347	2.419	2.261	2.504					-0.4238	0.4748	0.5701	0.1454					0.138	0.153	0.174	0.153
775	747	RNA processing	Npm1	NPM1	§265	nucleophosmin	Q61937	http://www.phosphosite.org/proteinAction.do?id=1394&showAllSites=true	33	SLPKVEAK*FINYVKN	GGSLPKVEAK*FINYVK	2	896.504	10380	10338							10339	10300							2.695	2.837							0.5998	0.6417							0.281	0.321
776	748	RNA processing	Npm1	NPM1	§265	nucleophosmin	Q61937	http://www.phosphosite.org/proteinAction.do?id=1394&showAllSites=true	33	SLPKVEAK*FINYVKN	GGSLPKVEAK*FINYVK	3	598.005	10363	10345	10419	10375	10490	10417	10996	10884	10350	10300	10359	10352	10565	10490	10984	10937	4.444	3.221	3.801	4.092	3.99	3.501	3.708	4.263	0.6567	0.5401	0.7036	0.6115	0.5607	0.6495	0.4955	0.2873	0.421	0.323	0.368	0.286
777	749	RNA processing	Npm1	NPM1	§265	nucleophosmin	Q61937	http://www.phosphosite.org/proteinAction.do?id=1394&showAllSites=true	33	SLPKVEAK*FINYVKN	GGSLPKVEAK*FINYVK	3	598.005		10247	10322	10289		10513				10300	10359	10352		10490				3.137	3.793	3.99		3.222				0.5635	0.6941	0.5535		0.6679				0.383	0.234	0.35
778	750	RNA processing	Npm1	NPM1	§265	nucleophosmin	Q61937	http://www.phosphosite.org/proteinAction.do?id=1394&showAllSites=true	33	SLPKVEAK*FINYVKN	GGSLPKVEAK*FINYVK	3	598.005			10327								10359								2.963								0.6829								0.266
779	751	RNA processing	Npm1	NPM1	§265	nucleophosmin	Q61937	http://www.phosphosite.org/proteinAction.do?id=1394&showAllSites=true	33	SLPKVEAK*FINYVKN	VEAK*FINYVK	2	626.85	8130	8176	8171	8231	8238	8302	8642	8661	8183	8142	8137	8186	8292	8257	8685	8704	3.534	3.889	3.79	3.552	3.676	3.675	3.447	3.731	0.6279	0.5896	0.7013	0.7596	0.4068	0.5265	0.5712	0.097	0.432	0.396	0.42	0.433
780	752	RNA processing	Npm1	NPM1	§265	nucleophosmin	Q61937	http://www.phosphosite.org/proteinAction.do?id=1394&showAllSites=true	33	SLPKVEAK*FINYVKN	VEAK*FINYVK	2	626.85	8228	8088	8072	8133	8337	8203	8741	8760	8183	8142	8137	8186	8292	8257	8685	8704	3.427	3.295	3.411	3.519	3.562	3.414	3.443	3.537	0.6271	0.592	0.7053	0.7612	0.4036	0.5289	0.5728	0.0978	0.428	0.311	0.449	0.358
781	753	RNA processing	Npm1	NPM1	§265	nucleophosmin	Q61937	http://www.phosphosite.org/proteinAction.do?id=1394&showAllSites=true	33	SLPKVEAK*FINYVKN	VEAK*FINYVK	3	418.236			8113	8165								8186							1.966	2.509							0.7756	0.7077							0.007	0.065
782	754	RNA processing	Npm1	NPM1	§32	nucleophosmin	Q61937	http://www.phosphosite.org/proteinAction.do?id=1394&showAllSites=true	33	ADKDYHFK*VDNDENE	ADKDYHFK*VDNDENEHQLSLR	4	654.558						5535																2.626								0.4822
783	755	RNA processing	Nudt21	CFIM25	§23	cleavage and polyadenylation specificity factor subunit 5	Q9CQF3	http://www.phosphosite.org/proteinAction.do?id=5140324&showAllSites=true	26	GVNQFGNK*YIQQTKP	GNK*YIQQTKPLTLER	2	916.007		5696	5658	5707	5794	5748	6044	6138			5662			5738		6141		1.688	3.07	2.001	1.972	3.035	2.284	3.703		0.8113	0.6934	0.8075	0.9998	0.1734	0.7933	0.4705		0.198	0.347	0.29
784	756	RNA processing	Nudt21	CFIM25	§23	cleavage and polyadenylation specificity factor subunit 5	Q9CQF3	http://www.phosphosite.org/proteinAction.do?id=5140324&showAllSites=true	26	GVNQFGNK*YIQQTKP	GNK*YIQQTKPLTLER	3	611.007	5783		5712	5748		5812	6008	6103			5662						3.357		3.852	3.704		3.47	3.095	3.254	0.0205		0.1472	0.2444		0.2898	0.1008	-0.0467	0.171		0.274	0.236
785	757	RNA processing	Nudt21	CFIM25	§23	cleavage and polyadenylation specificity factor subunit 5	Q9CQF3	http://www.phosphosite.org/proteinAction.do?id=5140324&showAllSites=true	26	GVNQFGNK*YIQQTKP	GNK*YIQQTKPLTLER	3	611.007	5687		5621	5663													3.09		2.887	3.366					0.032		0.1472	0.2412					0.182		0.199	0.177
786	758	RNA processing	Nudt21	CFIM25	§23	cleavage and polyadenylation specificity factor subunit 5	Q9CQF3	http://www.phosphosite.org/proteinAction.do?id=5140324&showAllSites=true	26	GVNQFGNK*YIQQTKP	GVNQFGNK*Y	2	534.759			6264		6415	6384													1.869		1.503	1.702					0.1123		-0.3286	0.1834					0.068
787	759	RNA processing	Nudt21	CFIM25	§23	cleavage and polyadenylation specificity factor subunit 5	Q9CQF3	http://www.phosphosite.org/proteinAction.do?id=5140324&showAllSites=true	26	GVNQFGNK*YIQQTKP	GVNQFGNK*YIQQT	2	769.884			7630	7673	7802	7748	8178	8226					7797						2.284	2.73	2.893	2.487	2.585	2.325			0.3376	0.6385	0.4305	0.504	0.2453	0.2999			0.292	0.319
788	760	RNA processing	Nudt21	CFIM25	§23	cleavage and polyadenylation specificity factor subunit 5	Q9CQF3	http://www.phosphosite.org/proteinAction.do?id=5140324&showAllSites=true	26	GVNQFGNK*YIQQTKP	GVNQFGNK*YIQQTK	2	833.931	6095	6032	6015	6068	6167	6129	6482	6547	6119	6074	6047	6085	6183	6167	6496	6592	3.96	4.268	3.962	4.194	4.048	3.585	4.052	3.431	0.4658	0.6134	0.8126	0.5402	0.5426	0.6416	0.4922	0.329	0.385	0.401	0.373	0.393
789	761	RNA processing	Nudt21	CFIM25	§23	cleavage and polyadenylation specificity factor subunit 5	Q9CQF3	http://www.phosphosite.org/proteinAction.do?id=5140324&showAllSites=true	26	GVNQFGNK*YIQQTKP	GVNQFGNK*YIQQTK	3	556.29			6033	6099			6503												3.095	3.572			3.659				0.2768	0.296			0.1346				0.197	0.289
790	762	RNA processing	Nudt21	CFIM25	§23	cleavage and polyadenylation specificity factor subunit 5	Q9CQF3	http://www.phosphosite.org/proteinAction.do?id=5140324&showAllSites=true	26	GVNQFGNK*YIQQTKP	GVNQFGNK*YIQQTKPLTL	3	697.713	9992	9998	9988	10002	10171	10108	10583						10191				3.064	3.045	3.542	3.258	3.955	3.678	2.913		0.8867	1.1468	1.0301	1.0134	0.683	0.8628	0.7026		0.24	0.133	0.301	0.269
791	763	RNA processing	Nudt21	CFIM25	§23	cleavage and polyadenylation specificity factor subunit 5	Q9CQF3	http://www.phosphosite.org/proteinAction.do?id=5140324&showAllSites=true	26	GVNQFGNK*YIQQTKP	GVNQFGNK*YIQQTKPLTLER	3	792.76	8239	8199	8205	8159	8361	8231	8708	8610	8216	8186	8159	8219	8325	8301	8674	8671	4.14	3.711	4.104	4.014	3.509	3.814	3.914	3.976	1.0382	0.8922	0.9805	0.9839	0.792	0.7663	0.9511	0.4234	0.318	0.324	0.445	0.309
792	764	RNA processing	Nudt21	CFIM25	§23	cleavage and polyadenylation specificity factor subunit 5	Q9CQF3	http://www.phosphosite.org/proteinAction.do?id=5140324&showAllSites=true	26	GVNQFGNK*YIQQTKP	GVNQFGNK*YIQQTKPLTLER	3	792.76	8144	8113	8108	8254	8262	8324	8614	8650	8216	8186	8159	8219	8325	8301	8674	8671	3.114	3.349	3.152	3.266	3.292	3.804	3.534	3.501	1.0411	0.9077	0.9797	0.9831	0.7912	0.7604	0.9545	0.4238	0.123	0.244	0.341	0.37
793	765	RNA processing	Nudt21	CFIM25	§23	cleavage and polyadenylation specificity factor subunit 5	Q9CQF3	http://www.phosphosite.org/proteinAction.do?id=5140324&showAllSites=true	26	GVNQFGNK*YIQQTKP	GVNQFGNK*YIQQTKPLTLER	4	594.822		8140	8130	8180	8284	8252	8629	8624		8197	8159	8219	8325	8301	8674	8682		3.94	4.323	4.813	4.203	4.67	3.601	3.781		0.5185	0.7697	0.8152	0.5559	0.7474	0.5934	0.0678		0.294	0.278	0.266
794	766	RNA processing	Nxf2	Nxf-b	86	nuclear RNA export factor 2	Q99MW6	http://www.phosphosite.org/proteinAction.do?id=26413817&showAllSites=true	80	APYAMGMK*RRRERCS	NNHFDHYGAPYAM#GMK*	3	637.603		3361																2.161								-1.7821								0.058
795	767	RNA processing	Pabpc5	PABPC5	35, 36	polyadenylate-binding protein 5	Q8C7D3	http://www.phosphosite.org/proteinAction.do?id=9983021&showAllSites=true	43	VTEDMLYK*KFRPAGP, TEDMLYKK*FRPAGPL	KAALYVGDLDPDVTEDMLYK*K*	4	617.812								12035																2.523								0.8962
796	768	RNA processing	Pnpt1	PNPT1	250	polyribonucleotide nucleotidyltransferase 1, mitochondrial precursor	Q8K1R3	http://www.phosphosite.org/proteinAction.do?id=8916&showAllSites=true	86	HAIKVGVK*YTQQIIQ	VGVK*YTQQIIQGIQQLVK	3	695.74							15393																2.571								0.7531
797	769	RNA processing	Prpf40a	FNBP3	§196	pre-mRNA-processing factor 40 homolog A	Q9R1C7	http://www.phosphosite.org/proteinAction.do?id=6068&showAllSites=true	108	EYKSDSGK*PYYYNSQ	SDSGK*PYYYNSQTK	2	840.381	4160	4060		4056	4176		4438	4546	4146	4052		4061	4168		4439	4529	2.098	2.665		2.463	2.223		2.866	3.141	0.3431	0.7062		0.9485	0.6604		0.6187	0.5556	0.252	0.408		0.415
798	770	RNA processing	Prpf40b; Prpf40b	HYPC; HYPC iso3	§148; §148	pre-mRNA-processing factor 40 homolog B	Q80W14; Q80W14-3	http://www.phosphosite.org/proteinAction.do?id=11665&showAllSites=true	99; 100	EYKSDTGK*PYYYNNQ; EYKSDTGK*PYYYNNQ	SDTGK*PYYYNNQSQESR	2	1039.96	4264				4313	4232	4567		4278				4311	4244	4571		2.217				1.973	2.536	2.153		1.2402				0.9871	0.7404	1.421		0.367
799	771	RNA processing	Prpf40b; Prpf40b	HYPC; HYPC iso3	§148; §148	pre-mRNA-processing factor 40 homolog B	Q80W14; Q80W14-3	http://www.phosphosite.org/proteinAction.do?id=11665&showAllSites=true	99; 100	EYKSDTGK*PYYYNNQ; EYKSDTGK*PYYYNNQ	SDTGK*PYYYNNQSQESR	3	693.64	4266	4169	4143	4187		4216		4679	4289	4184	4147	4182		4222		4682	2.13	2.457	2.762	2.912		2.652		3.167	0.5436	0.1891	0.5316	0.8635		0.7154		0.0472	0.1	0.282	0.202	0.256
800	772	RNA processing	Pspc1	PSPC1	380	paraspeckle component 1	Q8R326	http://www.phosphosite.org/proteinAction.do?id=5140307&showAllSites=true	59	RQQEGGFK*PNYMENR	QQEGGFK*PNYMENR	2	870.394	5927	5875	5845	5927	6006		6295	6403	5954	5876	5838	5920	6007		6320	6416	2.591	3.214	1.943	2.112	2.773		2.493	2.929	0.3884	0.9798	0.9195	1.3655	1.8023		1.1994	0.7965	0.371	0.487	0.288	0.34
801	773	RNA processing	Pspc1	PSPC1	380	paraspeckle component 1	Q8R326	http://www.phosphosite.org/proteinAction.do?id=5140307&showAllSites=true	59	RQQEGGFK*PNYMENR	QQEGGFK*PNYM#ENR	2	878.391	4497	4400	4383	4423	4540		4788		4509	4382	4389	4391	4531		4780		2.585	3.196	2.211	1.831	2.135		3.055		-0.1179	1.0002	1.3191	1.5088	0.7934		0.1139		0.446	0.461	0.248	0.326
802	774	RNA processing	Pspc1	PSPC1	380	paraspeckle component 1	Q8R326	http://www.phosphosite.org/proteinAction.do?id=5140307&showAllSites=true	59	RQQEGGFK*PNYMENR	RQQEGGFK*PNYMENR	3	632.632			4622	4674	4764	4690	5026	5154			4639	4666	4779	4705	5055	5163			2.479	2.804	2.578	3.198	2.899	3.001			0.8174	0.7799	0.6518	0.944	0.1586	0.3943			0.017	0.099
803	775	RNA processing	Pspc1	PSPC1	380	paraspeckle component 1	Q8R326	http://www.phosphosite.org/proteinAction.do?id=5140307&showAllSites=true	59	RQQEGGFK*PNYMENR	RQQEGGFK*PNYM#ENR	3	637.964				3454								3456								2.912								1.3636								0.11
804	776	RNA processing	Rbmx; Rbmxrt	RBMX; RBMXRT	§30; 30	RNA binding motif protein, X-linked	Q9WV02; Q91VM5	http://www.phosphosite.org/proteinAction.do?id=2129402&showAllSites=true	42; 42	ALEAVFGK*YGRIVEV; ALEAVFGK*YGRIVEI	ALEAVFGK*YGR	2	626.838	8683		8637	8673	8793	8769	9252	9253	8689		8643	8670	8776	8774	9257	9254	2.665		2.97	2.521	3.111	2.627	1.885	2.957	0.7006		0.5577	1.0096	0.3973	1.562	1.2714	0.8395	0.308		0.422	0.306
805	777	RNA processing	Srsf1	SF2	§179	serine/arginine-rich splicing factor 1 isoform 2	Q6PDM2	http://www.phosphosite.org/proteinAction.do?id=5608&showAllSites=true	28	VRKLDNTK*FRSHEGE	KLDNTK*FR	2	532.298	2745	2695	2670	2698	2782	2702	3044	3125	2763	2715	2669	2707	2789		3061	3143	2.36	2.31	2.301	2.354	2.349	2.276	2.336	2.541	-0.4285	-0.3251	0.2362	-0.0637	0.1751	-0.2527	-0.0722	-0.169	0.071	0.032	0.178	0.087
806	778	RNA processing	Srsf2	SFRS2	§36	serine/arginine-rich splicing factor 2	Q62093	http://www.phosphosite.org/proteinAction.do?id=9847&showAllSites=true	25	TLRRVFEK*YGRVGDV	VFEK*YGR	2	470.748				3846		3891		4336				3852		3879		4331				2.077		2.217		2.155				0.7315		0.2636		-0.1521				0.131
807	779	RNA processing	Strbp	STRBP	372	spermatid perinuclear RNA-binding protein	Q91WM1	http://www.phosphosite.org/proteinAction.do?id=20398&showAllSites=true	74	DDKDPNKK*MKRNLRK	GSSALKRPFEDGLGDDKDPNKK*	4	604.808		10103																3.314								-0.1734								0.046
808	780	RNA processing	Trnt1	TRNT1	395	CCA tRNA nucleotidyltransferase 1, mitochondrial isoform a	Q8K1J6	http://www.phosphosite.org/proteinAction.do?id=17762&showAllSites=true	50	VSGHDIRK*VGISSGK	K*VGISSGKEIGALLQQLR	3	647.049	11513																2.846								0.5108								0.011
809	781	RNA processing	Trnt1	TRNT1	§402	CCA tRNA nucleotidyltransferase 1, mitochondrial isoform a	Q8K1J6	http://www.phosphosite.org/proteinAction.do?id=17762&showAllSites=true	50	KVGISSGK*EIGALLQ	KVGISSGK*EIGALLQQLR	3	647.049			11564	11585		11690	12278	12176			11593	11632			12274	12206			2.234	2.77		2.591	3.594	2.746			0.7593	0.4855		0.7108	0.404	0.2116			0.126	0.12
810	782	RNA processing	Trnt1	TRNT1	§402	CCA tRNA nucleotidyltransferase 1, mitochondrial isoform a	Q8K1J6	http://www.phosphosite.org/proteinAction.do?id=17762&showAllSites=true	50	KVGISSGK*EIGALLQ	VGISSGK*EIGALLQQLR	3	604.351							14103	14034								14043							3.09	3.845							-1.7546	-2.3912
811	783	RNA processing	U2af2	U2AF2	§70	splicing factor U2AF 65 kDa subunit isoform 1	P26369	http://www.phosphosite.org/proteinAction.do?id=9509&showAllSites=true	54	KPLTRGAK*EEHGGLI	GAK*EEHGGLIR	2	604.823	2394				2441	2394		2757	2411				2459	2379		2764	3.477				3.297	3.008		3.66	-0.2324				-0.2721	0.1515		-0.5625	0.266
812	784	RNA processing	U2af2	U2AF2	§70	splicing factor U2AF 65 kDa subunit isoform 1	P26369	http://www.phosphosite.org/proteinAction.do?id=9509&showAllSites=true	54	KPLTRGAK*EEHGGLI	GAK*EEHGGLIR	3	403.551	2383	2344															2.049	2.223							-0.4119	-0.3507							0.088	0.046
813	Receptor, channel, transporter or cell surface protein
814	785	Receptor, channel, transporter or cell surface protein	ATP8	ATP8	§54	ATP synthase F0 subunit 8	P03930	http://www.phosphosite.org/proteinAction.do?id=15686&showAllSites=true	8	VKTPWELK*WTKIYLP	TPWELK*WTK	2	615.83			9825	9845							9842	9835							2.063	2.263							-0.0826	0.2132							0.143	0.212
815	786	Receptor, channel, transporter or cell surface protein	Abca5	ABCA5	1521, 1523, 1526	ATP-binding cassette sub-family A member 5	Q8K448	http://www.phosphosite.org/proteinAction.do?id=15508&showAllSites=true	186	IGTVQHLK*SKFGKGY, TVQHLKSK*FGKGYFL, HLKSKFGK*GYFLEIK	VAIM#VSGQLRCIGTVQHLK*SK*FGK*GYFLEIK	4	913.245				14138																2.123								-1.0196								0.025
816	787	Receptor, channel, transporter or cell surface protein	Alb	albumin	210	serum albumin precursor	P07724	http://www.phosphosite.org/proteinAction.do?id=6883&showAllSites=true	69	TPKLDGVK*EKALVSS	LDGVK*EK	2	415.735					1957																2.099								-0.0597
817	788	Receptor, channel, transporter or cell surface protein	Alb	albumin	§229	serum albumin precursor	P07724	http://www.phosphosite.org/proteinAction.do?id=6883&showAllSites=true	69	MKCSSMQK*FGERAFK	CSSMQK*FGER	2	636.279					4319								4311								2.141								-0.1516
818	789	Receptor, channel, transporter or cell surface protein	Atox1	ATOX1	§60	copper transport protein ATOX1	O08997	http://www.phosphosite.org/proteinAction.do?id=1171414&showAllSites=true	7	ATLNKTGK*AVSYLGP	TGK*AVSYLGPK	2	581.827	4995	4920	4912			4985		5425	4999	4932	4925			5002		5460	2.156	2.248	2.523			2.282		2.804	0.1116	-0.2669	0.0918			-0.1335		-0.106	0.052	0.058	0.205
819	790	Receptor, channel, transporter or cell surface protein	Atp1a3	ATP1A3	44	sodium/potassium-transporting ATPase subunit alpha-3	Q6PIC6	http://www.phosphosite.org/proteinAction.do?id=11847&showAllSites=true	112	SVEEVCRK*YNTDCVQ	K*YNTDCVQGLTHSK	3	564.938	4129		4029	4055	4165				4135		4026	4061	4146				2.773		2.945	3.168	2.458				-0.0983		0.6212	0.3406	-0.1007				0.357		0.325	0.378
820	791	Receptor, channel, transporter or cell surface protein	Atp5a1	ATP5A1	§239	ATP synthase subunit alpha, mitochondrial precursor	Q03265	http://www.phosphosite.org/proteinAction.do?id=6895&showAllSites=true	60	FNDGTDEK*KKLYCIY	FNDGTDEK*K	2	548.251				1838								1830								2.186								1.0985								0.012
821	792	Receptor, channel, transporter or cell surface protein	Atp5a1	ATP5A1	§240	ATP synthase subunit alpha, mitochondrial precursor	Q03265	http://www.phosphosite.org/proteinAction.do?id=6895&showAllSites=true	60	NDGTDEKK*KLYCIYV	FNDGTDEKK*K	2	612.299	1498	1472	1443	1471	1527	1458	1664	1693	1501		1451	1467	1523			1698	3.186	2.757	2.796	3.01	2.408	2.897	2.839	2.773	-0.0855	-0.1133	0.382	0.2014	0.2986	-0.1991	0.2373	-0.6584	0.289	0.27	0.272	0.319
822	793	Receptor, channel, transporter or cell surface protein	Atp5a1	ATP5A1	§240	ATP synthase subunit alpha, mitochondrial precursor	Q03265	http://www.phosphosite.org/proteinAction.do?id=6895&showAllSites=true	60	NDGTDEKK*KLYCIYV	FNDGTDEKK*K	3	408.535		1477					1662								1661			2.151					2.145			-0.119					-0.092			0.185
823	794	Receptor, channel, transporter or cell surface protein	Atp5a1	ATP5A1	§261	ATP synthase subunit alpha, mitochondrial precursor	Q03265	http://www.phosphosite.org/proteinAction.do?id=6895&showAllSites=true	60	STVAQLVK*RLTDADA	STVAQLVK*R	2	522.314		5170	5164							5163	5156							2.141	2.159							0.0078	0.2521							0.051	0.098
824	795	Receptor, channel, transporter or cell surface protein	Atp5a1	ATP5A1	§498	ATP synthase subunit alpha, mitochondrial precursor	Q03265	http://www.phosphosite.org/proteinAction.do?id=6895&showAllSites=true	60	GVRGYLDK*LEPSKIT	GYLDK*LEPSK	2	596.316	7560	7528					7996	8052	7534						8036	8066	2.526	2.053					2.512	2.252	2.4106	2.6112					2.8461	2.09	0.246	0.066
825	796	Receptor, channel, transporter or cell surface protein	Atp5a1	ATP5A1	§531	ATP synthase subunit alpha, mitochondrial precursor	Q03265	http://www.phosphosite.org/proteinAction.do?id=6895&showAllSites=true	60	GNIRSDGK*ISEQSDA	SDGK*ISEQSDAK	2	653.81	1835	1802	1765	1813	1857	1774	2043	2094	1851	1821	1781	1819	1875	1790	2056	2103	3.719	3.407	3.371	3.521	3.415	3.141	3.338	3.243	0.009	0.2294	0.1689	0.4031	0.0297	0.4498	0.3687	0.1085	0.426	0.404	0.419	0.376
826	797	Receptor, channel, transporter or cell surface protein	Atp5a1	ATP5A1	§539	ATP synthase subunit alpha, mitochondrial precursor	Q03265	http://www.phosphosite.org/proteinAction.do?id=6895&showAllSites=true	60	ISEQSDAK*LKEIVTN	ISEQSDAK*LK	2	580.812		2706	2671			2736				2715	2680			2730				3.266	2.964			3.071				0.0844	-0.0087			0.3894				0.184	0.129
827	798	Receptor, channel, transporter or cell surface protein	Atp5c1	ATP5C	§55	ATP synthase subunit gamma, mitochondrial isoform b	Q91VR2	http://www.phosphosite.org/proteinAction.do?id=11730&showAllSites=true	33	MKMVAAAK*YARAERE	MVAAAK*YAR	2	511.776	3655	3601		3606				4068	3660	3596		3599					2.107	2.419		2.188				1.562	-0.136	0.5397		0.4772				0.1701	0.011	0.168		0.008
828	799	Receptor, channel, transporter or cell surface protein	Atp5f1	ATP5F1	§154	ATP synthase subunit b, mitochondrial precursor	Q9CQQ7	http://www.phosphosite.org/proteinAction.do?id=15751&showAllSites=true	29	QDAIDMEK*AQQALVQ	QIQDAIDM#EK*AQQALVQKR	3	757.73			6716	6755							6707								2.801	2.335							0.7318	1.3882							0.143	0.092
829	800	Receptor, channel, transporter or cell surface protein	Atp5f1	ATP5F1	§162	ATP synthase subunit b, mitochondrial precursor	Q9CQQ7	http://www.phosphosite.org/proteinAction.do?id=15751&showAllSites=true	29	AQQALVQK*RHYLFDV	AQQALVQK*R	2	542.317				2713	2769							2685	2767							2.758	2.989							-0.1845	-0.2518							0.073
830	801	Receptor, channel, transporter or cell surface protein	Atp5f1	ATP5F1	§221	ATP synthase subunit b, mitochondrial precursor	Q9CQQ7	http://www.phosphosite.org/proteinAction.do?id=15751&showAllSites=true	29	HMIDWVEK*HVVKSIS	RKEEEHMIDWVEK*HVVK	4	559.29				7996								7999								2.958								0.0701								0.212
831	802	Receptor, channel, transporter or cell surface protein	Atp5f1	ATP5F1	§233	ATP synthase subunit b, mitochondrial precursor	Q9CQQ7	http://www.phosphosite.org/proteinAction.do?id=15751&showAllSites=true	29	SISVQQEK*ETIAKCI	SISVQQEK*ETIAK	2	751.907	6390			6319	6440	6403	6737	6820	6358			6327	6455	6398	6727	6812	3.614			3.194	3.535	3.894	3.37	3.168	0.537			0.9442	0.4338	0.875	0.4931	0.0512	0.329			0.237
832	803	Receptor, channel, transporter or cell surface protein	Atp5f1	ATP5F1	§244	ATP synthase subunit b, mitochondrial precursor	Q9CQQ7	http://www.phosphosite.org/proteinAction.do?id=15751&showAllSites=true	29	AKCIEDLK*LLAKKAQ	CIEDLK*LLAK	2	622.85	9343	9299	9322	9349	9487	9450	9955	9913	9349	9308	9336	9363	9502	9456	9983	9914	3.472	2.61	3.349	3.363	3.311	1.886	3.229	3.16	0.1929	0.1993	0.3351	0.176	-0.1598	-0.008	0.2845	-0.1903	0.263	0.35	0.268	0.306
833	804	Receptor, channel, transporter or cell surface protein	Atp5h	ATP5H	§117	ATP synthase subunit d, mitochondrial	Q9DCX2	http://www.phosphosite.org/proteinAction.do?id=8575&showAllSites=true	19	LRIQEYEK*QLEKMRN	IQEYEK*QLEK	2	675.351	4440	4355	4338	4363	4488	4408	4737	4850	4476	4371	4367	4391	4509	4442	4758	4880	3.379	3.319	3.533	3.242	3.459	3.214	3.459	3.458	0.2203	0.1336	0.0388	0.1195	0.2699	0.2247	0.0358	-0.125	0.234	0.287	0.186	0.22
834	805	Receptor, channel, transporter or cell surface protein	Atp5h	ATP5H	§117	ATP synthase subunit d, mitochondrial	Q9DCX2	http://www.phosphosite.org/proteinAction.do?id=8575&showAllSites=true	19	LRIQEYEK*QLEKMRN	IQEYEK*QLEK	3	450.57				4393																1.976								-0.0094								0.036
835	806	Receptor, channel, transporter or cell surface protein	Atp5h	ATP5H	§149	ATP synthase subunit d, mitochondrial	Q9DCX2	http://www.phosphosite.org/proteinAction.do?id=8575&showAllSites=true	19	ETKLDKKK*YPYWPHQ	K*YPYWPHQPIENL	2	863.933	10280	10243	10280	10285	10454	10412	10903		10295	10267	10304	10308	10499	10446	10940		3.242	3.164	3.208	3.277	3.456	3.542	3.412		1.0254	0.8586	1.0891	0.9964	0.6907	0.4834	0.741		0.261	0.34	0.289	0.363
836	807	Receptor, channel, transporter or cell surface protein	Atp5h	ATP5H	§72	ATP synthase subunit d, mitochondrial	Q9DCX2	http://www.phosphosite.org/proteinAction.do?id=8575&showAllSites=true	19	GLVDDFEK*KYNALKI	ANVAKPGLVDDFEK*K	2	836.949								6598								6603								3.558								0.203
837	808	Receptor, channel, transporter or cell surface protein	Atp5h	ATP5H	§85	ATP synthase subunit d, mitochondrial	Q9DCX2	http://www.phosphosite.org/proteinAction.do?id=8575&showAllSites=true	19	KIPVPEDK*YTALVDQ	IPVPEDK*YTALVDQEEKEDVK	3	829.755	9420	9398		9411	9580	9517	9988	9927	9459	9418		9429	9590	9533	10005	9969	2.712	3.449		3.707	3.339	3.406	3.39	3.063	-0.1874	0.7647		0.6195	0.7056	0.2227	0.2215	0.2271	0.081	0.3		0.406
838	809	Receptor, channel, transporter or cell surface protein	Atp5h	ATP5H	§85	ATP synthase subunit d, mitochondrial	Q9DCX2	http://www.phosphosite.org/proteinAction.do?id=8575&showAllSites=true	19	KIPVPEDK*YTALVDQ	YNALKIPVPEDK*YTALVDQEEKEDVK	4	769.899				10365																2.253								0.5406								0.026
839	810	Receptor, channel, transporter or cell surface protein	Atp5h	ATP5H	§95	ATP synthase subunit d, mitochondrial	Q9DCX2	http://www.phosphosite.org/proteinAction.do?id=8575&showAllSites=true	19	ALVDQEEK*EDVKSCA	YNALKIPVPEDKYTALVDQEEK*EDVK	4	769.899	10358	10330							10350								3.108	3.068							0.994	0.8695							0.149	0.086
840	811	Receptor, channel, transporter or cell surface protein	Atp5j	ATP5J	§34	ATP synthase-coupling factor 6, mitochondrial precursor	P97450	http://www.phosphosite.org/proteinAction.do?id=9526&showAllSites=true	12	VTAVAFNK*ELDPVQK	NK*ELDPVQK	2	556.801		3477						3921										2.071						2.56		0.287						0.4191		0.205
841	812	Receptor, channel, transporter or cell surface protein	Atp5j	ATP5J	§99	ATP synthase-coupling factor 6, mitochondrial precursor	P97450	http://www.phosphosite.org/proteinAction.do?id=9526&showAllSites=true	12	TFKFDDPK*FEVIDKP	FDDPK*FEVIDKPQS	2	853.917	8859	8811	8814	8861	8981	8956	9408	9384	8876	8824	8830	8879	8996	8983	9433	9397	3.029	3.141	3.072	3.218	3.149	3.176	3.423	3.365	0.4796	0.619	0.9132	1.0983	0.2675	0.3794	0.5042	0.1872	0.349	0.316	0.335	0.323
842	813	Receptor, channel, transporter or cell surface protein	Atp5j	ATP5J	§99	ATP synthase-coupling factor 6, mitochondrial precursor	P97450	http://www.phosphosite.org/proteinAction.do?id=9526&showAllSites=true	12	TFKFDDPK*FEVIDKP	GEM#DTFPTFKFDDPK*FEVIDKPQS	3	959.449							12514	12473							12516	12470							4.604	4.654							1.4893	0.365
843	814	Receptor, channel, transporter or cell surface protein	Atp5j	ATP5J	§99	ATP synthase-coupling factor 6, mitochondrial precursor	P97450	http://www.phosphosite.org/proteinAction.do?id=9526&showAllSites=true	12	TFKFDDPK*FEVIDKP	GEM#DTFPTFKFDDPK*FEVIDKPQS	3	959.449							12525								12516								2.817								1.4893
844	815	Receptor, channel, transporter or cell surface protein	Atp5j	ATP5J	§99	ATP synthase-coupling factor 6, mitochondrial precursor	P97450	http://www.phosphosite.org/proteinAction.do?id=9526&showAllSites=true	12	TFKFDDPK*FEVIDKP	QM#YGKGEM#DTFPTFKFDDPK*FEVIDKPQS	4	875.657				10796								10352								3.429								0.8663								0.185
845	816	Receptor, channel, transporter or cell surface protein	Atp5k	ATP5I	34	ATP synthase subunit e, mitochondrial	Q06185	http://www.phosphosite.org/proteinAction.do?id=9530&showAllSites=true	8	AKRYSYLK*PRAEEER	YSYLK*PR	2	484.764		4555		4566	4678		4952			4536		4578	4669		4967			1.942		1.762	1.915		1.725			0.4933		0.3942	0.2961		0.0793			0.003		0.088
846	817	Receptor, channel, transporter or cell surface protein	Atp5o	ATP5O	§172	ATP synthase subunit O, mitochondrial precursor	Q9DB20	http://www.phosphosite.org/proteinAction.do?id=15764&showAllSites=true	23	LSPNQILK*LEIKTDP	SFLSPNQILK*LEIK	2	836.488		12679					13464	13397		12681					13451	13383		2.827					4.007	2.693		1.2707					0.9842	1.2982		0.277
847	818	Receptor, channel, transporter or cell surface protein	Atp5o	ATP5O	§172	ATP synthase subunit O, mitochondrial precursor	Q9DB20	http://www.phosphosite.org/proteinAction.do?id=15764&showAllSites=true	23	LSPNQILK*LEIKTDP	SFLSPNQILK*LEIK	3	557.994	12675	12682	12742	12772		12868	13453		12681	12703	12748	12776		12873	13451		4.293	4.499	4.574	4.702		4.375	3.397		0.4262	0.6092	0.3245	0.5165		0.2827	0.1367		0.297	0.275	0.313	0.262
848	819	Receptor, channel, transporter or cell surface protein	Atp5o	ATP5O	§192	ATP synthase subunit O, mitochondrial precursor	Q9DB20	http://www.phosphosite.org/proteinAction.do?id=15764&showAllSites=true	23	MIVRIGEK*YVDMSAK	IGEK*YVDMSAK	2	641.821	5606	5527	5491		5637		5960		5580	5513	5508		5633		5924		3.287	3.192	3.641		3.84		3.161		0.0047	0.092	0.2207		-0.1559		0.1669		0.422	0.404	0.417
849	820	Receptor, channel, transporter or cell surface protein	Atp5o	ATP5O	§192	ATP synthase subunit O, mitochondrial precursor	Q9DB20	http://www.phosphosite.org/proteinAction.do?id=15764&showAllSites=true	23	MIVRIGEK*YVDMSAK	IGEK*YVDM#SAK	2	649.818	3762			3702	3813				3759			3709	3796				3.357			3.641	2.857				-0.1498			-0.2338	-0.5456				0.384			0.427
850	821	Receptor, channel, transporter or cell surface protein	Atp5o	ATP5O	26	ATP synthase subunit O, mitochondrial precursor	Q9DB20	http://www.phosphosite.org/proteinAction.do?id=15764&showAllSites=true	23	SVVRPFAK*LVRPPVQ	FAK*LVRPPVQVYGIEGR	3	657.711			9059																2.135								0.5994								0.062
851	822	Receptor, channel, transporter or cell surface protein	Atp6v1e1	ATP6V1E1	156, 160	V-type proton ATPase subunit E 1	P50518	http://www.phosphosite.org/proteinAction.do?id=10227&showAllSites=true	26	QKAIPMYK*IATKKDV, PMYKIATK*KDVDVQI	QKAIPMYK*IATK*	3	492.615		8893																1.952								2.8594								0.165
852	823	Receptor, channel, transporter or cell surface protein	Casc4	CASC4	79, 84	protein CASC4 isoform 3	Q6P2L7	http://www.phosphosite.org/proteinAction.do?id=1288197&showAllSites=true	49	LLVDTHKK*QIDQKEA, HKKQIDQK*EADYGRL	LLVDTHKK*QIDQK*	3	550.645						1623																2.383								0.6207
853	824	Receptor, channel, transporter or cell surface protein	Cox4i1	COX4I1	§29	cytochrome c oxidase subunit 4 isoform 1, mitochondrial precursor	P19783	http://www.phosphosite.org/proteinAction.do?id=13225&showAllSites=true	20	RAHGSVVK*SEDYAFP	AHGSVVK*SEDYAFPTYADRR	4	578.533								6437								6438								3.022								0.145
854	825	Receptor, channel, transporter or cell surface protein	Cpne1	CPNE1	§170	copine-1	Q8C166	http://www.phosphosite.org/proteinAction.do?id=24752&showAllSites=true	59	FFRQGDGK*WQLAYRT	QGDGK*WQLAYR	2	682.341		7334	7304	7359	7485	7434				7350	7334	7372	7500	7454				2.901	2.299	2.572	2.449	2.617				0.5613	0.5063	0.5701	0.5283	0.7717				0.289	0.334	0.369
855	826	Receptor, channel, transporter or cell surface protein	Gap43	GAP43	113	neuromodulin	P06837	http://www.phosphosite.org/proteinAction.do?id=2143&showAllSites=true	24	GDAPSEEK*KGEGDAA	AGDAPSEEK*KGEGDAAPSEEK	3	715.326	1927		1844	1910	1982				1928		1836	1907	1974				2.983		2.922	2.617	2.648				0.0885		-1.0263	0.7	-1.0972				0.222		0.316	0.301
856	827	Receptor, channel, transporter or cell surface protein	Gap43	GAP43	114	neuromodulin	P06837	http://www.phosphosite.org/proteinAction.do?id=2143&showAllSites=true	24	DAPSEEKK*GEGDAAP	AGDAPSEEKK*GEGDAAPSEEK	3	715.326		1913					2140			1908					2144			2.933					3.107			-1.1037					0.2867			0.26
857	828	Receptor, channel, transporter or cell surface protein	Gap43	GAP43	146	neuromodulin	P06837	http://www.phosphosite.org/proteinAction.do?id=2143&showAllSites=true	24	TDNSPSSK*AEDGPAK	ATTDNSPSSK*AEDGPAKEEPK	3	734.345								2696																1.788								-0.818
858	829	Receptor, channel, transporter or cell surface protein	Gap43	GAP43	206	neuromodulin	P06837	http://www.phosphosite.org/proteinAction.do?id=2143&showAllSites=true	24	KDAVDEAK*PKESARQ	AAQPPTETAESSQAEEEKDAVDEAK*PK	3	966.788		5493	5395	5422	5527	5568	5794	5901		5436	5442	5513	5567	5529	5792	5888		2.618	1.651	2.143	2.114	2.57	2.304	1.74		1.0801	1.333	1.1915	0.9131	0.8513	0.7406	0.468		0.407	0.204	0.298
859	830	Receptor, channel, transporter or cell surface protein	Gap43	GAP43	206	neuromodulin	P06837	http://www.phosphosite.org/proteinAction.do?id=2143&showAllSites=true	24	KDAVDEAK*PKESARQ	AAQPPTETAESSQAEEEKDAVDEAK*PK	3	966.788		5404	5478	5527	5516					5436		5513	5567					1.962	1.376	1.999	1.952					1.0076	1.2864	1.1791	0.9473					0.304	0.044	0.339
860	831	Receptor, channel, transporter or cell surface protein	Gap43	GAP43	206	neuromodulin	P06837	http://www.phosphosite.org/proteinAction.do?id=2143&showAllSites=true	24	KDAVDEAK*PKESARQ	AAQPPTETAESSQAEEEKDAVDEAK*PK	3	966.788			5363																1.274								1.3337								0.009
861	832	Receptor, channel, transporter or cell surface protein	Gap43	GAP43	206	neuromodulin	P06837	http://www.phosphosite.org/proteinAction.do?id=2143&showAllSites=true	24	KDAVDEAK*PKESARQ	AAQPPTETAESSQAEEEKDAVDEAK*PK	4	725.343			5447	5467		5505					5420	5480							2.918	2.547		2.517					0.9159	1.2823		1.4662					0.144	0.029
862	833	Receptor, channel, transporter or cell surface protein	Gap43	GAP43	208	neuromodulin	P06837	http://www.phosphosite.org/proteinAction.do?id=2143&showAllSites=true	24	AVDEAKPK*ESARQDE	AAQPPTETAESSQAEEEKDAVDEAKPK*	3	966.788	5561	5401		5437		5473		5830		5436		5513		5529			1.938	1.615		2.322		1.574		1.651	0.98	1.017		1.2133		0.8193		0.4208	0.098	0.164		0.312
863	834	Receptor, channel, transporter or cell surface protein	Gap43	GAP43	208	neuromodulin	P06837	http://www.phosphosite.org/proteinAction.do?id=2143&showAllSites=true	24	AVDEAKPK*ESARQDE	AAQPPTETAESSQAEEEKDAVDEAKPK*	4	725.343							5767								5803								3.78								0.4849
864	835	Receptor, channel, transporter or cell surface protein	Gap43	GAP43	217	neuromodulin	P06837	http://www.phosphosite.org/proteinAction.do?id=2143&showAllSites=true	24	SARQDEGK*EDPEADQ	ESARQDEGK*EDPEADQEHA	3	728.309	2184	2147	2097	2150	2226	2141	2391	2479	2193	2156	2113	2169		2137	2398	2498	3.099	3.455	2.371	3.083	3.389	3.237	3.189	3.2	-0.7649	-0.8047	-0.2252	0.3318	0.3011	0.2874	-0.1199	-0.8657	0.283	0.327	0.19	0.221
865	836	Receptor, channel, transporter or cell surface protein	Gap43	GAP43	217	neuromodulin	P06837	http://www.phosphosite.org/proteinAction.do?id=2143&showAllSites=true	24	SARQDEGK*EDPEADQ	QDEGK*EDPEADQEHA	2	870.353	2523		2434			2499	2784	2857	2519		2428			2478	2775	2851	2.808		2.735			2.272	3.595	1.789	0.9839		0.7551			0.7459	1.3178	0.5091	0.299		0.393
866	837	Receptor, channel, transporter or cell surface protein	Gap43	GAP43	26	neuromodulin	P06837	http://www.phosphosite.org/proteinAction.do?id=2143&showAllSites=true	24	KIEQDGVK*PEDKAHK	IEQDGVK*PEDK	2	650.325	2448	2414		2435	2507	2420	2716	2770	2455	2417		2432	2503	2423	2720	2775	3.233	2.571		3.105	3.083	3.063	3.036	3.219	-0.3656	0.1377		-0.0978	0.4	0.1353	-0.0663	0.0592	0.297	0.232		0.237
867	838	Receptor, channel, transporter or cell surface protein	Gap43	GAP43	26	neuromodulin	P06837	http://www.phosphosite.org/proteinAction.do?id=2143&showAllSites=true	24	KIEQDGVK*PEDKAHK	IEQDGVK*PEDK	2	650.325		2426								2417								2.53								0.1377								0.149
868	839	Receptor, channel, transporter or cell surface protein	Gap43	GAP43	26	neuromodulin	P06837	http://www.phosphosite.org/proteinAction.do?id=2143&showAllSites=true	24	KIEQDGVK*PEDKAHK	NDEDQKIEQDGVK*PEDK	3	676.983	3237	3183	3145	3162	3269	3184			3228	3178	3146	3152	3273	3196			3.261	2.402	3.385	3.965	3.537	3.724			0.2651	0.0659	0.7885	0.7111	-0.3377	0.1709			0.299	0.106	0.284	0.328
869	840	Receptor, channel, transporter or cell surface protein	Gap43	GAP43	26	neuromodulin	P06837	http://www.phosphosite.org/proteinAction.do?id=2143&showAllSites=true	24	KIEQDGVK*PEDKAHK	QVEKNDEDQKIEQDGVK*PEDK	4	629.056			2763			2813	3079	3173						2807	3072				2.994			3.341	3.072	3.223			2.4683			-0.6365	0.3037	-1.0205			0.078
870	841	Receptor, channel, transporter or cell surface protein	Gp1ba	GPIbA	312	platelet glycoprotein Ib alpha chain precursor	O35930	http://www.phosphosite.org/proteinAction.do?id=4630&showAllSites=true	80	VKFSTNTK*VHTTHWS	TEVKFSTNTK*	3	399.543						1885																1.716								1.4908
871	842	Receptor, channel, transporter or cell surface protein	Gpm6a	GPM6A	250	neuronal membrane glycoprotein M6-a	P35802	http://www.phosphosite.org/proteinAction.do?id=8510&showAllSites=true	31	KDACRMQK*YEDIKSK	M#QK*YEDIK	2	556.768	3145							3524	3140							3532	2.276							2.382	0.6254							-0.8865	0.114
872	843	Receptor, channel, transporter or cell surface protein	Gpr126	GPR126	1121	G-protein coupled receptor 126 precursor	Q6F3F9	http://www.phosphosite.org/proteinAction.do?id=7790&showAllSites=true	130	KTATNIIK*KSSDNLG	LADNSDWSKTATNIIK*KSSDNLGK	4	662.844						14024																2.058								1.5896
873	844	Receptor, channel, transporter or cell surface protein	Hba-a1; Hba-a2	HBA1; Hba-a2	§17; §17	hemoglobin subunit alpha	P01942; Q91VB8	http://www.phosphosite.org/proteinAction.do?id=9368&showAllSites=true	15; 15	NIKAAWGK*IGGHGAE; NIKAAWGK*IGGHGAE	AAWGK*IGGHGAEYGAEALER	3	695.677	7763	7709				7830	8206	8235	7765	7713				7839	8223	7505	3.441	3.274				2.988	3.819	2.559	0.8537	0.6858				0.7093	0.5266	0.0628	0.261	0.311
874	845	Receptor, channel, transporter or cell surface protein	Hbb-b1; Hbb-b2	HBD; HBB	§145; §145	hemoglobin subunit beta-1	P02088; P02089	http://www.phosphosite.org/proteinAction.do?id=6584&showAllSites=true	16; 16	VATALAHK*YH-----; VATALAHK*YH-----	AGVATALAHK*YH	2	640.841	7124	7089	7069	7116	7239	7182	7556	7627	7149	7097	7092	7141	7247	7201	7574	7626	2.97	3.322	2.527	3.33	3.072	2.78	2.648	2.716	0.7892	0.0973	0.1598	0.4604	-0.1283	0.2715	0.1723	-0.2712	0.46	0.489	0.481	0.479
875	846	Receptor, channel, transporter or cell surface protein	Hbb-b1; Hbb-b2	HBD; HBB	§145; §145	hemoglobin subunit beta-1	P02088; P02089	http://www.phosphosite.org/proteinAction.do?id=6584&showAllSites=true	16; 16	VATALAHK*YH-----; VATALAHK*YH-----	VVAGVATALAHK*YH	2	739.909	7173	7132	7127	7176	7200	7246	7513	7590	7149	7097	7092	7141	7247	7201	7585	7626	4.09	4.385	4.404	4.153	3.878	4.532	3.766	3.942	0.2805	0.3028	0.248	0.3454	-0.0684	0.1344	0.2142	0.01	0.505	0.516	0.549	0.518
876	847	Receptor, channel, transporter or cell surface protein	Hbb-b1; Hbb-b2	HBD; HBB	§145; §145	hemoglobin subunit beta-1	P02088; P02089	http://www.phosphosite.org/proteinAction.do?id=6584&showAllSites=true	16; 16	VATALAHK*YH-----; VATALAHK*YH-----	VVAGVATALAHK*YH	2	739.909	7079	7035	7034	7080	7295	7148	7609	7683	7149	7097	7092	7141	7247	7201	7585	7626	3.746	3.962	4.055	4.113	3.564	4.056	3.654	3.929	0.2893	0.3049	0.2359	0.342	-0.0684	0.1317	0.2142	0.0114	0.502	0.48	0.532	0.505
877	848	Receptor, channel, transporter or cell surface protein	Hbb-b1; Hbb-b2	HBD; HBB	§145; §145	hemoglobin subunit beta-1	P02088; P02089	http://www.phosphosite.org/proteinAction.do?id=6584&showAllSites=true	16; 16	VATALAHK*YH-----; VATALAHK*YH-----	VVAGVATALAHK*YH	3	493.609	7172	7032	7027			7235	7575	7671	7138					7201	7585	7626	1.776	1.369	1.279			1.652	1.795	2.125	0.7288	0.814	0.8269			0.7701	0.8397	0.3948	0.231	0.117	0.051
878	849	Receptor, channel, transporter or cell surface protein	Hbb-b1; Hbb-b2	HBD; HBB	§145; §145	hemoglobin subunit beta-1	P02088; P02089	http://www.phosphosite.org/proteinAction.do?id=6584&showAllSites=true	16; 16	VATALAHK*YH-----; VATALAHK*YH-----	VVAGVATALAHK*YH	3	493.609								7577																1.736								0.4076
879	850	Receptor, channel, transporter or cell surface protein	Hbb-b2	HBB	§18	hemoglobin subunit beta-2	P02089	http://www.phosphosite.org/proteinAction.do?id=14465&showAllSites=true	16	AVSCLWAK*VNPDEVG	SAVSCLWAK*VNPDEVGGEALGR	3	786.39	12418	12440	12463	12513	12689	12599	13188	13087	12395	12417	12473	12501	12688	12565	13187	13097	6.585	5.951	5.409	5.772	5.888	5.893	5.6	5.12	1.1426	1.2415	1.2568	1.1443	1.034	0.9212	0.866	0.4834	0.517	0.499	0.427	0.48
880	851	Receptor, channel, transporter or cell surface protein	Hbb-b2	HBB	§18	hemoglobin subunit beta-2	P02089	http://www.phosphosite.org/proteinAction.do?id=14465&showAllSites=true	16	AVSCLWAK*VNPDEVG	SAVSCLWAK*VNPDEVGGEALGR	3	786.39	12376	12390	12435	12474	12652	12549			12395	12417	12473	12501	12688	12565			5.467	4.738	4.541	4.078	5.729	5.018			1.146	1.2207	1.2563	1.1371	1.006	0.875			0.389	0.359	0.219	0.359
881	852	Receptor, channel, transporter or cell surface protein	Hbegf	HBEGF	88, 93	proheparin-binding EGF-like growth factor precursor	Q06186	http://www.phosphosite.org/proteinAction.do?id=9205&showAllSites=true	23	QGLATPSK*ERNGKKK, PSKERNGK*KKKKGKG	K*ERNGK*K	2	472.27								969																1.505								-0.4853
882	853	Receptor, channel, transporter or cell surface protein	Hnrnpm	hnRNP M	238	heterogeneous nuclear ribonucleoprotein M isoform b	Q9D0E1	http://www.phosphosite.org/proteinAction.do?id=6794&showAllSites=true	78	RADILEDK*DGKSRGI	ADILEDK*DGK	2	573.288		4552	4544			4602								4617				2.209	2.291			2.844				-1.3832	-2.0702			-2.2055				0.08	0.153
883	854	Receptor, channel, transporter or cell surface protein	Hnrnpm	hnRNP M	§697	heterogeneous nuclear ribonucleoprotein M isoform b	Q9D0E1	http://www.phosphosite.org/proteinAction.do?id=6794&showAllSites=true	78	SKGCGVVK*FESPEVA	GCGVVK*FESPEVAER	2	853.414	7032	6995	6987	7035	7145	7108	7457	7534	7083	7042	7026	7064	7181	7135	7486	7571	4.109	4.564	4.765	4.077	4.649	5.094	4.364	4.99	0.6463	0.8134	0.7536	0.9318	0.4646	0.7993	0.4036	0.3872	0.41	0.376	0.422	0.404
884	855	Receptor, channel, transporter or cell surface protein	Hnrnpm	hnRNP M	§697	heterogeneous nuclear ribonucleoprotein M isoform b	Q9D0E1	http://www.phosphosite.org/proteinAction.do?id=6794&showAllSites=true	78	SKGCGVVK*FESPEVA	GCGVVK*FESPEVAER	3	569.279		7056	7021	7070	7195	7149		7563		7031	7026	7086	7181			7582		3.657	3.377	3.062	3.435	2.458		3.383		0.3679	0.4417	0.566	0.0032	0.6545		-0.0367		0.218	0.2	0.183
885	856	Receptor, channel, transporter or cell surface protein	Hnrnpm	hnRNP M	§697	heterogeneous nuclear ribonucleoprotein M isoform b	Q9D0E1	http://www.phosphosite.org/proteinAction.do?id=6794&showAllSites=true	78	SKGCGVVK*FESPEVA	SKGCGVVK*FESPEVAER	3	640.988		5674	5646		5768	5730				5645	5629		5765	5716				3.338	4.197		3.902	4.537				0.6606	0.3233		0.4279	0.443				0.2	0.286
886	857	Receptor, channel, transporter or cell surface protein	Hsd17b4	HSD17B4	§564	peroxisomal multifunctional enzyme type 2	P51660	http://www.phosphosite.org/proteinAction.do?id=9183&showAllSites=true	79	AIKVRFAK*PVYPGQT	FAK*PVYPGQTLQTEM#WK	3	694.684			9268			9389	9849	9791			9259			9390	9840	9771			2.014			2.82	3.123	2.15			1.0482			0.5218	0.9324	0.832			0.031
887	858	Receptor, channel, transporter or cell surface protein	Igsf9	IGSF9	589	protein turtle homolog A precursor	Q05BQ1	http://www.phosphosite.org/proteinAction.do?id=3748437&showAllSites=true	127	FSVLAQNK*LGSGPFS	LQAHAQYQFSVLAQNK*	3	629.995		11777																1.671								1.9024								0.092
888	859	Receptor, channel, transporter or cell surface protein	Itpr2	IP3R2	416	inositol 1,4,5-trisphosphate receptor type 2 isoform 2	Q9Z329	http://www.phosphosite.org/proteinAction.do?id=10981&showAllSites=true	307	EERPVMLK*IGTCQTK	LCTNTWVTSTTIPIDTEEERPVMLK*	5	596.1						11886																2.438								-0.8736
889	860	Receptor, channel, transporter or cell surface protein	Kcnq1	Kv7.1	423	potassium voltage-gated channel subfamily KQT member 1	P97414	http://www.phosphosite.org/proteinAction.do?id=7749&showAllSites=true	75	MVKKKKFK*LDKDNGM	KKFK*LDKDNGM#SPGEK	3	627.324					10938																2.029								2.1328
890	861	Receptor, channel, transporter or cell surface protein	Mep1b	MEP1B	397	meprin A subunit beta precursor	Q61847	http://www.phosphosite.org/proteinAction.do?id=1236853&showAllSites=true	80	YVTLQVTK*KFRVVFE	TLQVTK*K	2	430.266								3871																1.807								0.0986
891	862	Receptor, channel, transporter or cell surface protein	Nup160	NUP160	655	nuclear pore complex protein Nup160	Q9Z0W3	http://www.phosphosite.org/proteinAction.do?id=9037&showAllSites=true	158	ETEVEMEK*GFDPAQP	EM#DYETEVEM#EK*	2	803.81	16271																1.017								2.1899								0.022
892	863	Receptor, channel, transporter or cell surface protein	Olfr378	Olfr378	236	olfactory receptor 378	NP_667235	http://www.ncbi.nlm.nih.gov/entrez/query.fcgi?db=protein&cmd=search&term=NP_667235	36	PSFQGIRK*AFSTCGS	IVSSIFKFPSFQGIRK*AFSTCGSHLSVVSLFYG	5	742.591		15452																2.457								-0.8737								0.056
893	864	Receptor, channel, transporter or cell surface protein	P2rx1	P2X1	53	P2X purinoceptor 1	P51576	http://www.phosphosite.org/proteinAction.do?id=16483&showAllSites=true	45	GWVFVYEK*GYQTSSG	YEK*GYQTSSGLISSVSVK	4	494.506					1847																2.654								-0.6457
894	865	Receptor, channel, transporter or cell surface protein	Pgam5	PGAM5 iso2	§190	serine/threonine-protein phosphatase PGAM5, mitochondrial isoform 1	Q8BX10-2	http://www.phosphosite.org/proteinAction.do?id=18995001&showAllSites=true	32	DPPVSHWK*PEAVYYE	EGAPIEPDPPVSHWK*PEAVYYEDGAR	3	984.466	9548	9433	9454	9630	9711	9573	9998	10058	9547	9552	9556	9550	9729	9665	10082	10046	2.516	2.717	3.327	3.062	2.622	3.099	2.933	2.997	0.9513	0.8804	0.7358	0.9123	0.6697	0.6561	1.1986	0.6768	0.292	0.258	0.428	0.268
895	866	Receptor, channel, transporter or cell surface protein	Pgam5	PGAM5 iso2	§190	serine/threonine-protein phosphatase PGAM5, mitochondrial isoform 1	Q8BX10-2	http://www.phosphosite.org/proteinAction.do?id=18995001&showAllSites=true	32	DPPVSHWK*PEAVYYE	EGAPIEPDPPVSHWK*PEAVYYEDGAR	3	984.466	9458	9520	9557	9530	9616	9667	10094	9944	9547	9552	9556	9550	9729	9665	10082	10046	2.381	2.564	2.869	2.94	2.3	2.173	2.809	2.9	0.9031	0.8926	0.9014	0.9604	0.6504	0.7551	1.0664	0.6483	0.173	0.173	0.298	0.243
896	867	Receptor, channel, transporter or cell surface protein	Pgam5	PGAM5 iso2	§190	serine/threonine-protein phosphatase PGAM5, mitochondrial isoform 1	Q8BX10-2	http://www.phosphosite.org/proteinAction.do?id=18995001&showAllSites=true	32	DPPVSHWK*PEAVYYE	EGAPIEPDPPVSHWK*PEAVYYEDGAR	3	984.466		9610	9463	9448				9964		9552	9556	9550				10046		2.348	2.707	2.642				1.801		0.9092	0.7812	1.0116				0.7273		0.186	0.322	0.188
897	868	Receptor, channel, transporter or cell surface protein	Pgam5	PGAM5 iso2	§190	serine/threonine-protein phosphatase PGAM5, mitochondrial isoform 1	Q8BX10-2	http://www.phosphosite.org/proteinAction.do?id=18995001&showAllSites=true	32	DPPVSHWK*PEAVYYE	EGAPIEPDPPVSHWK*PEAVYYEDGAR	4	738.602				9598	9662	9619		10021				9593	9729	9676		10057				2.965	3.309	3.109		2.711				0.8211	0.0229	0.0862		-0.1465				0.161
898	869	Receptor, channel, transporter or cell surface protein	Pgam5	PGAM5 iso2	§190	serine/threonine-protein phosphatase PGAM5, mitochondrial isoform 1	Q8BX10-2	http://www.phosphosite.org/proteinAction.do?id=18995001&showAllSites=true	32	DPPVSHWK*PEAVYYE	EGAPIEPDPPVSHWK*PEAVYYEDGAR	4	738.602				9504								9593								2.856								0.792								0.055
899	870	Receptor, channel, transporter or cell surface protein	Pgam5	PGAM5 iso2	§190	serine/threonine-protein phosphatase PGAM5, mitochondrial isoform 1	Q8BX10-2	http://www.phosphosite.org/proteinAction.do?id=18995001&showAllSites=true	32	DPPVSHWK*PEAVYYE	PPVSHWK*PEAVYYEDGAR	3	715.013				7575	7695		8028	8040				7559			8014	8044				3.362	3.489		4.154	4.449				1.1101	0.6686		0.363	0.4176				0.196
900	871	Receptor, channel, transporter or cell surface protein	Pgam5	PGAM5 iso2	§190	serine/threonine-protein phosphatase PGAM5, mitochondrial isoform 1	Q8BX10-2	http://www.phosphosite.org/proteinAction.do?id=18995001&showAllSites=true	32	DPPVSHWK*PEAVYYE	PPVSHWK*PEAVYYEDGAR	3	715.013							8000								8014								4.063								0.363
901	872	Receptor, channel, transporter or cell surface protein	Pgrmc2	PGRMC2	187	membrane-associated progesterone receptor component 2	Q80UU9	http://www.phosphosite.org/proteinAction.do?id=15792&showAllSites=true	23	WEMQFKEK*YDYVGRL	EK*YDYVGR	2	536.259		3924																1.646								-0.64								0.056
902	873	Receptor, channel, transporter or cell surface protein	Pigr	PIGR	167, 182	polymeric immunoglobulin receptor precursor	O70570	http://www.phosphosite.org/proteinAction.do?id=5161&showAllSites=true	85	PSKKSLCK*KTNQSCE, LVIDSTEK*VNPSYIG	SLCK*KTNQSCELVIDSTEK*VNPSYIGR	4	803.4		12306																2.816								2.4967								0.076
903	874	Receptor, channel, transporter or cell surface protein	Reep5	REEP5	§147	receptor expression-enhancing protein 5	Q60870	http://www.phosphosite.org/proteinAction.do?id=3642637&showAllSites=true	21	IIRPIFLK*HESQVDS	RIIRPIFLK*HESQVDSVVK	4	577.339						6799								6794								2.897								0.2286
904	875	Receptor, channel, transporter or cell surface protein	Sgpl1	SGPL1	§353	sphingosine-1-phosphate lyase 1	Q8R0X7	http://www.phosphosite.org/proteinAction.do?id=3396010&showAllSites=true	64	SISADTHK*YGYAPKG	GVTSISADTHK*YGYAPK	3	612.976				5323																2.095								0.5126								0.093
905	876	Receptor, channel, transporter or cell surface protein	Slc25a3	SLC25A3	§204	phosphate carrier protein, mitochondrial precursor	Q8VEM8	http://www.phosphosite.org/proteinAction.do?id=15732&showAllSites=true	40	EAVPKMYK*EEGLNAF	MYK*EEGLNAFYK	2	767.866								9117																2.392								2.4665
906	877	Receptor, channel, transporter or cell surface protein	Slc25a3	SLC25A3	§204	phosphate carrier protein, mitochondrial precursor	Q8VEM8	http://www.phosphosite.org/proteinAction.do?id=15732&showAllSites=true	40	EAVPKMYK*EEGLNAF	M#YK*EEGLNAFYK	2	775.863	7859	7793	7779	7831	7936	7914	8358	8392	7886	7801	7785	7856	7951	7927	8366	8396	3.273	4.093	4.246	4.088	3.467	3.693	3.67	3.824	0.4874	0.6473	0.8246	0.5661	0.557	0.6538	0.5357	0.2172	0.468	0.45	0.452	0.462
907	878	Receptor, channel, transporter or cell surface protein	Slc25a3	SLC25A3	§204	phosphate carrier protein, mitochondrial precursor	Q8VEM8	http://www.phosphosite.org/proteinAction.do?id=15732&showAllSites=true	40	EAVPKMYK*EEGLNAF	M#YK*EEGLNAFYK	2	775.863			7787								7785								4.12								0.8363								0.45
908	879	Receptor, channel, transporter or cell surface protein	Slc25a3	SLC25A3	§229	phosphate carrier protein, mitochondrial precursor	Q8VEM8	http://www.phosphosite.org/proteinAction.do?id=15732&showAllSites=true	40	QIPYTMMK*FACFERT	TM#M#K*FACFER	2	697.799				6370								6327								2.586								0.5595								0.348
909	880	Receptor, channel, transporter or cell surface protein	Slc25a3	SLC25A3	§94	phosphate carrier protein, mitochondrial precursor	Q8VEM8	http://www.phosphosite.org/proteinAction.do?id=15732&showAllSites=true	40	RMQVDPQK*YKGIFNG	MQVDPQK*YK	2	589.797	4329	4238	4221	4242	4392	4284		4733	4322	4899	4235	4259	4377	4947		4748	2.177	2.436	2.394	2.436	2.273	2.292		2.436	0.1885	0.0757	0.4889	0.5703	0.4252	0.6586		-0.0075	0.062	0.045	0.07	0.199
910	881	Receptor, channel, transporter or cell surface protein	Slc25a4	SLC25A4	§166	ADP/ATP translocase 1	P48962	http://www.phosphosite.org/proteinAction.do?id=9523&showAllSites=true	33	DCLTKIFK*SDGLKGL	IFK*SDGLK	2	475.271		4394								4404								2.279								-0.2095								0.005
911	882	Receptor, channel, transporter or cell surface protein	Slc25a4	SLC25A4	§263	ADP/ATP translocase 1	P48962	http://www.phosphosite.org/proteinAction.do?id=9523&showAllSites=true	33	DCWRKIAK*DEGANAF	IAK*DEGANAFFK	2	676.846	7483						7964	8015	7490						7981	8033	3.186						3.638	3.166	0.8869						0.4522	0.0508	0.339
912	883	Receptor, channel, transporter or cell surface protein	Slc25a4	SLC25A4	§263	ADP/ATP translocase 1	P48962	http://www.phosphosite.org/proteinAction.do?id=9523&showAllSites=true	33	DCWRKIAK*DEGANAF	KIAK*DEGANAFFK	3	494.265				6004								5997								2.814								0.2017								0.139
913	884	Receptor, channel, transporter or cell surface protein	Slc25a4; Slc25a5	SLC25A4; SLC25A5	§272; §272	ADP/ATP translocase 1	P48962; P51881	http://www.phosphosite.org/proteinAction.do?id=9523&showAllSites=true	33; 33	EGANAFFK*GAWSNVL; EGSKAFFK*GAWSNVL	AFFK*GAWSNVLR	2	719.385	11659			11744	11899				11625			11720	11874				2.895			2.912	3.319				1.2076			0.9315	0.8154				0.344			0.335
914	885	Receptor, channel, transporter or cell surface protein	Slc25a4	SLC25A4	§96	ADP/ATP translocase 1	P48962	http://www.phosphosite.org/proteinAction.do?id=9523&showAllSites=true	33	FAFKDKYK*QIFLGGV	YK*QIFLGGVDR	2	669.364		8412		8475	8575					8406		8483	8589					3.064		3.102	2.577					0.0858		1.1713	-1.0497					0.24		0.24
915	886	Receptor, channel, transporter or cell surface protein	Slc25a5	SLC25A5	§105	ADP/ATP translocase 2	P51881	http://www.phosphosite.org/proteinAction.do?id=8105&showAllSites=true	33	IFLGGVDK*RTQFWRY	QIFLGGVDK*R	2	587.833	7107						7568	7644	7105						7563	7648	2.501						2.249	2.196	0.0284						0.1016	-0.0269	0.112
916	887	Receptor, channel, transporter or cell surface protein	Slc25a5	SLC25A5	§155	ADP/ATP translocase 2	P51881	http://www.phosphosite.org/proteinAction.do?id=8105&showAllSites=true	33	AGAEREFK*GLGDCLV	EFK*GLGDCLVK	2	654.337				8246								8252								2.156								0.3759								0.156
917	888	Receptor, channel, transporter or cell surface protein	Slc25a5	SLC25A5	§163	ADP/ATP translocase 2	P51881	http://www.phosphosite.org/proteinAction.do?id=8105&showAllSites=true	33	GLGDCLVK*IYKSDGI	GLGDCLVK*IYK	2	654.355	9431		9428						9448		9424						1.894		2.982						0.1859		0.7617						0.133		0.286
918	889	Receptor, channel, transporter or cell surface protein	Slc4a4; Slc4a4; Slc4a4; Slc4a4	SLC4A4; SLC4A4 iso2; SLC4A4 iso4; SLC4A4 iso5	402; 358; 402; 393	electrogenic sodium bicarbonate cotransporter 1 isoform b	O88343; O88343-2; E9Q8N8; A7E1Z5	http://www.phosphosite.org/proteinAction.do?id=16741&showAllSites=true	121; 116; 123; 120	KSLPSSDK*RKNMYSG; KSLPSSDK*RKNMYSG; KSLPSSDK*RKNMYSG; KSLPSSDK*RKNMYSG	KSLPSSDK*R	2	530.293	1609																2.162								-0.4681								0.073
919	890	Receptor, channel, transporter or cell surface protein	Syn1; Syn1; Syn1	SYN1; SYN1 iso1; SYN1 iso3	311; 311; 311	synapsin-1 isoform b	O88935; O88935-1; O88935-3	http://www.phosphosite.org/proteinAction.do?id=2386&showAllSites=true	74; 70; 71	AEPFIDAK*YDVRVQK; AEPFIDAK*YDVRVQK; AEPFIDAK*YDVRVQK	TYATAEPFIDAK*YDVR	2	951.468	9942	9911	9944	9953	10120		10563	10539	9943	9926	9930	9956	10125		10566	10530	4.092	3.593	4.49	4.166	4.111		3.604	4.643	1.1141	0.8906	0.9337	1.255	0.918		1.0142	0.5163	0.378	0.502	0.461	0.423
920	891	Receptor, channel, transporter or cell surface protein	Syn1; Syn1; Syn1	SYN1; SYN1 iso1; SYN1 iso3	311; 311; 311	synapsin-1 isoform b	O88935; O88935-1; O88935-3	http://www.phosphosite.org/proteinAction.do?id=2386&showAllSites=true	74; 70; 71	AEPFIDAK*YDVRVQK; AEPFIDAK*YDVRVQK; AEPFIDAK*YDVRVQK	TYATAEPFIDAK*YDVR	3	634.648			9926	9943							9457	9462							3.597	3.349							0.5783	0.2245							0.279	0.379
921	892	Receptor, channel, transporter or cell surface protein	Tecr	GPSN2	60	trans-2,3-enoyl-CoA reductase isoform 2	Q9CY27	http://www.phosphosite.org/proteinAction.do?id=15755&showAllSites=true	36	DPKGKSLK*DEDVLQK	SLK*DEDVLQK	2	608.825	5466	5389	5384	5419	5522	5461	5807	5898	5470	5392	5376	5414	5512	5463	5814	5899	2.44	2.543	2.649	2.565	2.022	2.479	2.348	2.285	0.5015	0.6174	0.3782	1.1903	-0.2703	0.0569	0.4144	0.4243	0.123	0.128	0.167	0.164
922	893	Receptor, channel, transporter or cell surface protein	Tlr8	TLR8	932	toll-like receptor 8 precursor	P58682	http://www.phosphosite.org/proteinAction.do?id=951501&showAllSites=true	119	QSINQSKK*TIFVLTK	K*TIFVLTKK	3	373.909						6254								6255								2.144								0.4049
923	894	Receptor, channel, transporter or cell surface protein	Tmem63b	TMEM63B	671, 674	transmembrane protein 63B	Q3TWI9	http://www.phosphosite.org/proteinAction.do?id=20945&showAllSites=true	95	YYAYLPAK*LDKKIHS, YLPAKLDK*KIHSGAV	LPAK*LDK*	2	434.761		3487			3589													1.88			1.697					0.0885			0.4212					0.068
924	895	Receptor, channel, transporter or cell surface protein	Tomm70a	TOMM70A	§188	mitochondrial import receptor subunit TOM70	Q9CZW5	http://www.phosphosite.org/proteinAction.do?id=14806&showAllSites=true	68	KAVELNPK*YVKALFR	AVELNPK*YVK	2	601.843					5882			6282					5875								2.28			1.753					0.4146			-0.214
925	896	Receptor, channel, transporter or cell surface protein	Trdn	TRDN iso2	439, 440	triadin	E9Q9K5	http://www.phosphosite.org/proteinAction.do?id=3510501&showAllSites=true	78	TKKALHGK*KEEKAKT, KKALHGKK*EEKAKTV	KALHGK*K*EEK	3	417.907								4787																1.548								-0.0784
926	897	Receptor, channel, transporter or cell surface protein	Unc5d	UNC5D	695	netrin receptor UNC5D precursor	Q8K1S2	http://www.phosphosite.org/proteinAction.do?id=11186&showAllSites=true	106	DCAVKQLK*VAVFGCM	QLK*VAVFGCMSCNS	2	821.873	7590		7537	7481	7595	7561	8062										2.263		2.14	2.113	2.109	2.248	2.129		0.3708		0.6338	0.5997	0.2497	0.2929	0.2204		0.21		0.061	0.033
927	898	Receptor, channel, transporter or cell surface protein	Unc5d	UNC5D	695	netrin receptor UNC5D precursor	Q8K1S2	http://www.phosphosite.org/proteinAction.do?id=11186&showAllSites=true	106	DCAVKQLK*VAVFGCM	QLK*VAVFGCMSCNS	2	821.873					7689																1.978								0.2351
928	899	Receptor, channel, transporter or cell surface protein	Vdac1	VDAC1	§237	voltage-dependent anion-selective channel protein 1	Q60932	http://www.phosphosite.org/proteinAction.do?id=4806&showAllSites=true	32	TRFGIAAK*YQVDPDA	FGIAAK*YQVDPDACFSAK	2	1015.49	9933	10031	9859	9946	10129	9971	10659	10413	9899	9871	9897	9912	10059	9995	10478	10464	2.888	2.774	2.772	3.465	2.814	3.129	3.214	3.115	1.0852	1.3606	1.2719	1.2921	0.899	0.7512	0.8502	0.5064	0.5	0.589	0.531	0.512
929	900	Receptor, channel, transporter or cell surface protein	Vdac1	VDAC1	§237	voltage-dependent anion-selective channel protein 1	Q60932	http://www.phosphosite.org/proteinAction.do?id=4806&showAllSites=true	32	TRFGIAAK*YQVDPDA	FGIAAK*YQVDPDACFSAK	2	1015.49	10034	9828		9851		10065	10556	10727	9899	9871		9912		9995	10478	10464	2.454	2.764		2.795		2.924	3.187	2.866	1.2448	1.0995		1.2936		0.797	0.8857	0.8074	0.572	0.488		0.487
930	901	Receptor, channel, transporter or cell surface protein	Vdac1	VDAC1	§237	voltage-dependent anion-selective channel protein 1	Q60932	http://www.phosphosite.org/proteinAction.do?id=4806&showAllSites=true	32	TRFGIAAK*YQVDPDA	FGIAAK*YQVDPDACFSAK	2	1015.49				10053			10461					9912			10478					2.763			2.748					1.27			0.903					0.476
931	902	Receptor, channel, transporter or cell surface protein	Vdac1	VDAC1	§237	voltage-dependent anion-selective channel protein 1	Q60932	http://www.phosphosite.org/proteinAction.do?id=4806&showAllSites=true	32	TRFGIAAK*YQVDPDA	FGIAAK*YQVDPDACFSAK	3	677.328	9934	9928	9956	10038		10073	10545	10499	9899	9871	9897	9912		10017	10489	10464	2.993	2.714	3.328	3.894		4.139	3.118	4.082	0.9478	1.0542	1.1015	1.1892		0.7931	0.9365	0.5049	0.256	0.048	0.208	0.298
932	903	Receptor, channel, transporter or cell surface protein	Vdac1	VDAC1	§237	voltage-dependent anion-selective channel protein 1	Q60932	http://www.phosphosite.org/proteinAction.do?id=4806&showAllSites=true	32	TRFGIAAK*YQVDPDA	FGIAAK*YQVDPDACFSAK	3	677.328				9935								9912								3.838								1.1453								0.317
933	904	Receptor, channel, transporter or cell surface protein	Vdac1	VDAC1	§265	voltage-dependent anion-selective channel protein 1	Q60932	http://www.phosphosite.org/proteinAction.do?id=4806&showAllSites=true	32	LGYTQTLK*PGIKLTL	VNNSSLIGLGYTQTLK*PGIK	2	1073.1	10367								10361								2.053								1.6309								0.149
934	905	Receptor, channel, transporter or cell surface protein	Vdac1	VDAC1	§33	voltage-dependent anion-selective channel protein 1	Q60932	http://www.phosphosite.org/proteinAction.do?id=4806&showAllSites=true	32	SARDVFTK*GYGFGLI	DVFTK*GYGFGLIK	2	743.901		12238								12208								2.571								0.9478								0.23
935	906	Receptor, channel, transporter or cell surface protein	Vdac1	VDAC1	§74	voltage-dependent anion-selective channel protein 1	Q60932	http://www.phosphosite.org/proteinAction.do?id=4806&showAllSites=true	32	VNGSLETK*YRWTEYG	VNGSLETK*YR	2	604.817	4049								4058								3.022								0.1345								0.252
936	907	Receptor, channel, transporter or cell surface protein	Vdac2	VDAC2	§73	voltage-dependent anion-selective channel protein 2	Q60930	http://www.phosphosite.org/proteinAction.do?id=9588&showAllSites=true	32	VSGTLETK*YKWCEYG	VSGTLETK*YK	2	584.316	3951	3850	3854		4011			4367	3948	3876	3872		3992			4364	2.515	2.303	2.17		2.211			2.289	0.0732	0.0047	-0.1511		0.1812			-0.5442	0.196	0.183	0.238
937	908	Receptor, channel, transporter or cell surface protein	Vdac2	VDAC2	§75	voltage-dependent anion-selective channel protein 2	Q60930	http://www.phosphosite.org/proteinAction.do?id=9588&showAllSites=true	32	GTLETKYK*WCEYGLT	YK*WCEYGLTFTEK	2	883.908	10629	10590	10631	10654	10822	10769	11299	11240	10625	10608	10656	10671	10818	10776	11325	11256	4.523	4.281	4.175	3.837	4.443	3.909	4.292	3.791	0.3589	0.8264	0.8491	0.711	0.6142	0.8496	0.6646	-0.0265	0.538	0.505	0.514	0.465
938	909	Receptor, channel, transporter or cell surface protein	Vdac3; Vdac3	VDAC3; VDAC3 iso2	15; 15	voltage-dependent anion-selective channel protein 3 isoform 1	Q60931; Q5EBQ0	http://www.phosphosite.org/proteinAction.do?id=4345&showAllSites=true	31; 31	CDLGKAAK*DVFNKGY; CDLGKAAK*DVFNKGY	AAK*DVFNK	2	467.753	3609	3537	3530	3549	3649	3573	3937	4033	3616	3552	3547	3566	3664	3582	3955	4048	2.404	2.587	2.209	2.335	2.099	2.122	1.804	2.289	0.1608	0.4486	0.2988	0.0784	0.6413	0.2999	0.1073	0.0046	0.195	0.226	0.172	0.274
939	910	Receptor, channel, transporter or cell surface protein	Vdac3; Vdac3	VDAC3; VDAC3 iso2	174; 175	voltage-dependent anion-selective channel protein 3 isoform 1	Q60931; Q5EBQ0	http://www.phosphosite.org/proteinAction.do?id=4345&showAllSites=true	31; 31	NNFALGYK*AADFQLH; NNFALGYK*AADFQLH	LSQNNFALGYK*AADFQLHTHVNDGTEFGGSIYQK	4	953.963				10813								10792								4.432								1.5061								0.266
940	911	Receptor, channel, transporter or cell surface protein	Vdac3; Vdac3	VDAC3; VDAC3 iso2	224; 225	voltage-dependent anion-selective channel protein 3 isoform 1	Q60931; Q5EBQ0	http://www.phosphosite.org/proteinAction.do?id=4345&showAllSites=true	31; 31	TRFGIAAK*YKLDCRT; TRFGIAAK*YKLDCRT	FGIAAK*YK	2	470.269		5684								5645								2.792								0.0856								0.2
941	912	Receptor, channel, transporter or cell surface protein	Vdac3; Vdac3	VDAC3; VDAC3 iso2	§226; §227	voltage-dependent anion-selective channel protein 3 isoform 1	Q60931; Q5EBQ0	http://www.phosphosite.org/proteinAction.do?id=4345&showAllSites=true	31; 31	FGIAAKYK*LDCRTSL; FGIAAKYK*LDCRTSL	YK*LDCR	2	448.718	3031		2927		3034		3342						3024				1.529		1.514		1.704		1.431		0.402		0.7367		0.5805		0.3094		0.036		0.077
942	913	Receptor, channel, transporter or cell surface protein	Vdac3; Vdac3	VDAC3; VDAC3 iso2	§61; §62	voltage-dependent anion-selective channel protein 3 isoform 1	Q60931; Q5EBQ0	http://www.phosphosite.org/proteinAction.do?id=4345&showAllSites=true	31; 31	ASGNLETK*YKVCNYG; ASGNLETK*YKVCNYG	ASGNLETK*YK	2	576.798	3311	3234	3220	3223	3329	3254	3612	3703	3327	3242	3223	3251	3328	3273	3627	3718	2.818	2.652	2.267	2.944	2.878	2.881	2.427	2.685	-0.3074	-0.277	-0.0428	0.0006	-0.1356	-0.0671	0.162	-0.4853	0.177	0.242	0.147	0.268
943	914	Receptor, channel, transporter or cell surface protein	Vdac3; Vdac3	VDAC3; VDAC3 iso2	§61; §62	voltage-dependent anion-selective channel protein 3 isoform 1	Q60931; Q5EBQ0	http://www.phosphosite.org/proteinAction.do?id=4345&showAllSites=true	31; 31	ASGNLETK*YKVCNYG; ASGNLETK*YKVCNYG	ASGNLETK*YK	2	576.798							3640																2.197								0.162
944	915	Receptor, channel, transporter or cell surface protein	Vdac3; Vdac3	VDAC3; VDAC3 iso2	§63; §64	voltage-dependent anion-selective channel protein 3 isoform 1	Q60931; Q5EBQ0	http://www.phosphosite.org/proteinAction.do?id=4345&showAllSites=true	31; 31	GNLETKYK*VCNYGLT; GNLETKYK*VCNYGLT	YK*VCNYGLTFTQK	2	832.411	8258	8225	8208	8259	8365	8353	8787	8788	8282	8252	8214	8296	8402	8378	8806	8814	4.939	3.857	4.612	4.17	4.38	4.157	4.813	3.62	0.3464	0.3176	0.4456	0.7678	0.1235	0.1108	0.1962	-0.1692	0.492	0.427	0.482	0.467
945	916	Receptor, channel, transporter or cell surface protein	Vdac3; Vdac3	VDAC3; VDAC3 iso2	§63; §64	voltage-dependent anion-selective channel protein 3 isoform 1	Q60931; Q5EBQ0	http://www.phosphosite.org/proteinAction.do?id=4345&showAllSites=true	31; 31	GNLETKYK*VCNYGLT; GNLETKYK*VCNYGLT	YK*VCNYGLTFTQK	3	555.277			8211								8225								2.812								0.4186								0.049
946	917	Receptor, channel, transporter or cell surface protein	Vdac3; Vdac3	VDAC3; VDAC3 iso2	§90; §91	voltage-dependent anion-selective channel protein 3 isoform 1	Q60931; Q5EBQ0	http://www.phosphosite.org/proteinAction.do?id=4345&showAllSites=true	31; 31	TEISWENK*LAEGLKL; TEISWENK*LAEGLKL	WNTDNTLGTEISWENK*LAEGLK	3	854.422						13638		14218						13665		14230						4.216		4.777						0.8045		0.9342
947	918	Receptor, channel, transporter or cell surface protein	Vldlr	VLDLR	313	very low-density lipoprotein receptor isoform b precursor	P98156	http://www.phosphosite.org/proteinAction.do?id=12658&showAllSites=true	96	GSDEVNCK*NVNQCLG	DCVDGSDEVNCK*NVNQCLGPGKF	4	664.288			4374																2.729								1.0909								0.139
948	919	Receptor, channel, transporter or cell surface protein	Vps53	VPS53	§110	vacuolar protein sorting-associated protein 53 homolog	Q8CCB4	http://www.phosphosite.org/proteinAction.do?id=2383082&showAllSites=true	94	AIQQLFGK*IKDIKDK	AIQQLFGK*IK	2	594.361	9466	9434	9459	9467	9621			10052	9470	9429	9468					10057	2.991	2.273	2.073	1.914	1.918			2.413	0.4174	0.4326	0.3391	0.4241	0.0848			0.1943	0.259	0.136	0.118	0.102
949	Secreted protein
950	920	Secreted protein	Serpina1a; Serpina1c; Serpina1e	SERPINA1; Serpina1c; Serpina1e	§292; §292; §292	alpha-1-antitrypsin 1-1 precursor	P07758; Q00896; Q00898	http://www.phosphosite.org/proteinAction.do?id=2816400&showAllSites=true	46; 46; 46	LSKELISK*FLLNRRR; LSKELISK*FLLNRRR; LNKELISK*FLLNRRR	ELISK*FLLNR	2	637.877			11534	11551		11658					11538	11566		11663					2.459	2.548		2.236					0.4953	0.8593		0.4396					0.236	0.236
951	921	Secreted protein	Wnt3; Wnt3a	WNT3; WNT3A	207; 204	proto-oncogene Wnt-3 precursor	P17553; P27467	http://www.phosphosite.org/proteinAction.do?id=6197637&showAllSites=true	40; 39	DHMHLKCK*CHGLSGS; SHMHLKCK*CHGLSGS	K*CHGLSGSCEVK	3	468.552						4481																1.951								0.9408
952	Transcriptional regulator
953	922	Transcriptional regulator	2210018M11Rik	EMSY	1148	protein EMSY	Q8BMB0	http://www.phosphosite.org/proteinAction.do?id=11222&showAllSites=true	135	VVVAGMTK*CRESCSS	VVAGM#TK*	2	382.205				2429			2752													1.588			1.574					0.3093			-0.0968					0.016
954	923	Transcriptional regulator	Bcl9l	Bcl-9L	§36	B-cell CLL/lymphoma 9-like protein	Q67FY2	http://www.phosphosite.org/proteinAction.do?id=23624&showAllSites=true	157	HCPPAPAK*PMHPENK	GHCPPAPAK*PMHPENK	3	603.956				2063			2304	2352				2089			2307	2349				1.871			2.473	2.58				0.8512			-0.2705	-0.865				0.013
955	924	Transcriptional regulator	Bclaf1	BCLAF1	§333	bcl-2-associated transcription factor 1 isoform 1	Q8K019	http://www.phosphosite.org/proteinAction.do?id=3502&showAllSites=true	106	QETAKTGK*FLKRFTD	TGK*FLK	2	368.224					3655		3892						3609		3934						2.178		2.322						0.2829		0.1673
956	925	Transcriptional regulator	Bclaf1	BCLAF1	§333	bcl-2-associated transcription factor 1 isoform 1	Q8K019	http://www.phosphosite.org/proteinAction.do?id=3502&showAllSites=true	106	QETAKTGK*FLKRFTD	TGK*FLKR	2	446.274	2346	2290	2264	2312	2373	2347	2622	2710	2356	2288	2285	2344	2393	2324	2632	2720	2.243	2.148	2.24	2.335	2.615	2.073	2.449	2.263	-0.2243	-0.2467	0.0169	0.0853	0.1178	0.1941	0.0269	-0.4363	0.084	0.009	0.046	0.102
957	926	Transcriptional regulator	Bclaf1	BCLAF1	§435	bcl-2-associated transcription factor 1 isoform 1	Q8K019	http://www.phosphosite.org/proteinAction.do?id=3502&showAllSites=true	106	NTEEEGPK*YKSKVSL	NTEEEGPK*YK	2	618.791	2022	1977	1955	1997	2056	1977	2265	2316	2046	1985	1969	2014	2061	1995	2274	2336	2.499	2.945	2.555	2.463	3.019	2.688	2.731	2.554	0.0759	0.1826	0.6686	0.333	0.3662	0.3573	-0.0147	-0.2468	0.189	0.233	0.186	0.19
958	927	Transcriptional regulator	Brd8	BRD8	§554	bromodomain-containing protein 8	Q8R3B7	http://www.phosphosite.org/proteinAction.do?id=7088&showAllSites=true	103	PAPEMTVK*QERLDFE	DKPVPLPAPEM#TVK*QER	3	665.019	5414		5429	5479	5520	5450	5757		5448		5398	5425	5523	5485	5737		4.236		3.697	3.215	2.749	4.076	4.351		-0.0779		0.6461	0.2903	0.3225	0.6601	-0.1321		0.423		0.416	0.267
959	928	Transcriptional regulator	Cbx1	CBX1	84	chromobox protein homolog 1	P83917	http://www.phosphosite.org/proteinAction.do?id=9534&showAllSites=true	21	TDKSEGGK*RKADSDS	TAHETDKSEGGK*R	3	486.571	634		607						642								1.881		1.812						-0.8847		-0.4614						0.155		0.098
960	929	Transcriptional regulator	Ccdc101	CCDC101	§288	SAGA-associated factor 29 homolog	Q9DA08	http://www.phosphosite.org/proteinAction.do?id=1288245&showAllSites=true	33	QRYVVACK*EPKKK--	YVVACK*EPK	2	568.294	3347			3300			3648	3713	3349			3306			3660	3707	2.129			2.064			2.299	2.223	1.2644			0.2174			0.5723	0.3019	0.261			0.062
961	930	Transcriptional regulator	Ccnt1	CCNT1	475	cyclin-T1	Q9QWV9	http://www.phosphosite.org/proteinAction.do?id=16532&showAllSites=true	81	GDKAVSSK*PEEIKMR	AVSSK*PEEIK	2	565.309							3359								3363								1.665								-0.4067
962	931	Transcriptional regulator	Dhx9; Dhx9	DDX9; DDX9 iso2	§1026; §1027	ATP-dependent RNA helicase A	O70133; O70133-2	http://www.phosphosite.org/proteinAction.do?id=4486&showAllSites=true	149; 150	GRNALIHK*SSVNCPF; GRNALIHK*SSVNCPF	NALIHK*SSVNCPFSSQDM#K	3	741.017	5765	5730							5789	5722							4.188	3.464							0.8218	0.2982							0.287	0.275
963	932	Transcriptional regulator	Eno1	ENO1	§199	alpha-enolase	P17182	http://www.phosphosite.org/proteinAction.do?id=2760&showAllSites=true	47	LKNVIKEK*YGKDATN	NVIKEK*YGK	2	560.822								2730								2720								1.943								1.5361
964	933	Transcriptional regulator	Eno1	ENO1	§202	alpha-enolase	P17182	http://www.phosphosite.org/proteinAction.do?id=2760&showAllSites=true	47	VIKEKYGK*DATNVGD	YGK*DATNVGDEGGFAPNILENK	3	784.376	9302			9311	9442				9305			9297	9436				4.629			4.074	3.902				1.0992			0.6607	0.7386				0.34			0.227
965	934	Transcriptional regulator	Eno1	ENO1	§406	alpha-enolase	P17182	http://www.phosphosite.org/proteinAction.do?id=2760&showAllSites=true	47	CRSERLAK*YNQILRI	LAK*YNQILR	2	580.843	6649			6633		6700	7060	7135	6644			6602		6673	7057	7131	2.318			2.526		2.506	2.538	2.648	0.0016			0.4807		0.292	0.6271	-0.187	0.089			0.068
966	935	Transcriptional regulator	Epas1	HIF2A	§385	endothelial PAS domain-containing protein 1	P97481	http://www.phosphosite.org/proteinAction.do?id=4985&showAllSites=true	97	DDVAVTEK*SNYLFTK	DVVFSM#DQTESLFKPHLMAM#NSIFDSSDDVAVTEK*	4	1002.71						15036																2.38								1.5046
967	936	Transcriptional regulator	Hcfc1	HCFC1	§288	host cell factor 1	Q61191	http://www.phosphosite.org/proteinAction.do?id=16084&showAllSites=true	210	VKVATHEK*EWKCTNT	VATHEK*EWK	2	585.301	2278	2219	2204	2230	2299	2233	2538	2628	2284	2222		2234	2305	2236		2643	2.304	2.251	1.875	2.48	1.857	1.983	2.24	2.192	-0.1745	0.5993	-0.6028	-0.0975	0.3274	-0.0402	-0.4788	-0.0676	0.26	0.253	0.143	0.208
968	937	Transcriptional regulator	Hcfc1	HCFC1	§288	host cell factor 1	Q61191	http://www.phosphosite.org/proteinAction.do?id=16084&showAllSites=true	210	VKVATHEK*EWKCTNT	VATHEK*EWK	3	390.536					2307								2305								2.003								0.3385
969	938	Transcriptional regulator	Hdgfrp2; Hdgfrp2; Hdgfrp2	HDGF2; HDGF2 iso2; HDGF2 iso3	§39; §39; §39	hepatoma-derived growth factor-related protein 2	Q3UMU9; Q3UMU9-2; Q3UMU9-3	http://www.phosphosite.org/proteinAction.do?id=23300603&showAllSites=true	74; 74; 75	AVKPPPNK*YPIFFFG; AVKPPPNK*YPIFFFG; AVKPPPNK*YPIFFFG	IDDIADGAVKPPPNK*YPIFFFGTHETAFLGPK	4	886.959			12864					13462			12880					13427			3.672					3.911			2.149					1.9645			0.212
970	939	Transcriptional regulator	Hmgn3	HMGN3	§13	high mobility group nucleosome-binding domain-containing protein 3 isoform Hmgn3a	Q9DCB1	http://www.phosphosite.org/proteinAction.do?id=2613075&showAllSites=true	11	SPENTEGK*DGTKLTK	KSPENTEGK*DGTK	2	716.849	1371	1325	1321	1324	1376	1330	1534		1369	1337	1319	1328	1380	1328			3.17	2.623	3.232	3.064	3.519	3.339	1.924		0.0075	0.4459	0.6999	0.4975	0.598	0.6532	0.3586		0.414	0.302	0.379	0.346
971	940	Transcriptional regulator	Hmgn3	HMGN3	§13	high mobility group nucleosome-binding domain-containing protein 3 isoform Hmgn3a	Q9DCB1	http://www.phosphosite.org/proteinAction.do?id=2613075&showAllSites=true	11	SPENTEGK*DGTKLTK	KSPENTEGK*DGTK	3	478.235	1368	1323	1320	1320	1371				1369	1337	1319	1328	1380				3.148	2.731	2.615	2.274	2.8				-0.4161	0.0794	-0.0832	0.3405	0.4256				0.276	0.233	0.111	0.125
972	941	Transcriptional regulator	Hmgn3	HMGN3	§13	high mobility group nucleosome-binding domain-containing protein 3 isoform Hmgn3a	Q9DCB1	http://www.phosphosite.org/proteinAction.do?id=2613075&showAllSites=true	11	SPENTEGK*DGTKLTK	KSPENTEGK*DGTKLTK	3	592.311	1612	1584	1576		1636		1784	1835	1610	1590	1572		1644		1782	1840	2.794	3.252	3.026		3.989		2.909	3.255	0.2661	0.0469	0.5326		0.5101		0.3506	-0.2032	0.244	0.337	0.296
973	942	Transcriptional regulator	Hmgn3	HMGN3	§13	high mobility group nucleosome-binding domain-containing protein 3 isoform Hmgn3a	Q9DCB1	http://www.phosphosite.org/proteinAction.do?id=2613075&showAllSites=true	11	SPENTEGK*DGTKLTK	SPENTEGK*DGTK	2	652.802	1470	1448	1420	1437	1494	1429	1630	1653	1468	1447	1418	1445	1501	1438	1639	1657	3.505	3.569	3.615	3.53	3.252	3.711	3.505	3.315	0.0719	0.4391	0.5265	0.459	0.1677	0.7135	-0.0032	-0.4923	0.305	0.233	0.308	0.337
974	943	Transcriptional regulator	Hmgn3	HMGN3	§13	high mobility group nucleosome-binding domain-containing protein 3 isoform Hmgn3a	Q9DCB1	http://www.phosphosite.org/proteinAction.do?id=2613075&showAllSites=true	11	SPENTEGK*DGTKLTK	SPENTEGK*DGTKLTK	2	823.915	1995	1966	1950	1984	2042	1959	2227	2265	2013	1974	1958	1992	2039	1973	2241	2273	3.198	3.832	3.837	3.635	4.081	3.417	3.865	4.558	0.5564	0.4635	0.8163	1.8601	0.6943	0.6852	0.4732	0.1271	0.425	0.37	0.439	0.424
975	944	Transcriptional regulator	Hmgn3	HMGN3	§13	high mobility group nucleosome-binding domain-containing protein 3 isoform Hmgn3a	Q9DCB1	http://www.phosphosite.org/proteinAction.do?id=2613075&showAllSites=true	11	SPENTEGK*DGTKLTK	SPENTEGK*DGTKLTK	3	549.613	1984	1954	1928		2029		2220	2257	2013	1974	1947		2039		2241	2273	2.987	3.347	3.494		2.964		3.621	3.307	-0.2069	0.0937	0.07		0.05		-0.2427	-0.5256	0.298	0.322	0.351
976	945	Transcriptional regulator	Hmgn3	HMGN3	42	high mobility group nucleosome-binding domain-containing protein 3 isoform Hmgn3a	Q9DCB1	http://www.phosphosite.org/proteinAction.do?id=2613075&showAllSites=true	11	VPPKPESK*PRKTSAK	LSAKPVPPKPESK*PR	3	558.33				2352								2344								2.36								0.1597								0.06
977	946	Transcriptional regulator	Hmgn3	Hmgn3	63	high mobility group nucleosome-binding domain-containing protein 3 isoform Hmgn3b	NP_778249	http://www.ncbi.nlm.nih.gov/entrez/query.fcgi?db=protein&cmd=search&term=NP_778249	8	ISRGAKGK*KEEKQEA	GK*KEEKQEAGEEGTEN	3	602.278	1381			1342			1533					1339			1529		1.592			1.864			1.726		-0.0043			0.5813			0.5863		0.133			0.172
978	947	Transcriptional regulator	Hmgn3	Hmgn3	64	high mobility group nucleosome-binding domain-containing protein 3 isoform Hmgn3b	NP_778249	http://www.ncbi.nlm.nih.gov/entrez/query.fcgi?db=protein&cmd=search&term=NP_778249	8	SRGAKGKK*EEKQEAG	GKK*EEKQEAGEEGTEN	2	902.913	1385					1347											1.344					1.331			0.5209					1.4002			0.299
979	948	Transcriptional regulator	Hnrnpu	hnRNP U	§328	heterogeneous nuclear ribonucleoprotein U	Q8VEK3	http://www.phosphosite.org/proteinAction.do?id=5634&showAllSites=true	88	PVRHLYTK*DIDIHEV	HLYTK*DIDIHEVR	3	560.962	5637	5582	5576	5650		5651	5973	6045	5668	5590	5596	5634		5672	5968	6064	4.652	4.775	4.509	4.721		4.382	4.891	4.383	-0.0961	0.6261	0.2787	0.4274		0.4286	0.1597	0.2198	0.405	0.4	0.376	0.403
980	949	Transcriptional regulator	Hnrnpu	hnRNP U	§328	heterogeneous nuclear ribonucleoprotein U	Q8VEK3	http://www.phosphosite.org/proteinAction.do?id=5634&showAllSites=true	88	PVRHLYTK*DIDIHEV	HLYTK*DIDIHEVR	3	560.962	5621						5963		5668						5968		4.109						4.6		-0.0961						0.1597		0.399
981	950	Transcriptional regulator	Hnrnpu	hnRNP U	§789	heterogeneous nuclear ribonucleoprotein U	Q8VEK3	http://www.phosphosite.org/proteinAction.do?id=5634&showAllSites=true	88	QGQFWGQK*PWSQHYH	NQSQGYNQWQQGQFWGQK*PWSQHYHQGYY	4	925.91		10566			10764					10542			10763					5.47			4.84					2.0846			2.5448					0.468
982	951	Transcriptional regulator	Hoxd9	HOXD9	326, 332	homeobox protein Hox-D9	P28357	http://www.phosphosite.org/proteinAction.do?id=22078&showAllSites=true	35	WFQNRRMK*MKKMSKE, MKMKKMSK*EKCPKGD	RMK*MKKMSK*	2	626.34	12661																1.029								0.1384								0.064
983	952	Transcriptional regulator	Ing3	ING3	§264	inhibitor of growth protein 3	Q8VEK6	http://www.phosphosite.org/proteinAction.do?id=14575&showAllSites=true	47	NNDFQLGK*EFSIPRE	NNDFQLGK*EFSIPR	3	569.621			10518				11135				10513				11149				3.067				2.508				1.0621				0.8371				0.204
984	953	Transcriptional regulator	Ing4; Ing4	ING4; ING4 iso2	§114, §127, §129; §114, §127, §129	inhibitor of growth protein 4	Q8C0D7; Q8C0D7-2	http://www.phosphosite.org/proteinAction.do?id=10980&showAllSites=true	29; 28	FEADLKEK*QIESSDY, DYDSSSSK*GKKKGRT, DSSSSKGK*KKGRTQK; FEADLKEK*QIESSDY, DYDSSSSK*GKKSRTQ, DSSSSKGK*KSRTQKE	EK*QIESSDYDSSSSK*GK*K	3	710.334			3889								3883								3.925								0.3825								0.41
985	954	Transcriptional regulator	Ing4; Ing4	ING4; ING4 iso2	§127, §129; §127, §129	inhibitor of growth protein 4	Q8C0D7; Q8C0D7-2	http://www.phosphosite.org/proteinAction.do?id=10980&showAllSites=true	29; 28	DYDSSSSK*GKKKGRT, DSSSSKGK*KKGRTQK; DYDSSSSK*GKKSRTQ, DSSSSKGK*KSRTQKE	EKQIESSDYDSSSSK*GK*K	3	696.331							2653								2643								2.911								2.597
986	955	Transcriptional regulator	Ing4; Ing4	ING4; ING4 iso2	§127, §129; §127, §129	inhibitor of growth protein 4	Q8C0D7; Q8C0D7-2	http://www.phosphosite.org/proteinAction.do?id=10980&showAllSites=true	29; 28	DYDSSSSK*GKKKGRT, DSSSSKGK*KKGRTQK; DYDSSSSK*GKKSRTQ, DSSSSKGK*KSRTQKE	QIESSDYDSSSSK*GK*K	2	915.424	2955	2911	2866	2896	3005	2935	3223	3282	2964	2925	2860	2910	3013	2943	3228	3305	4.405	3.18	3.504	4.262	3.61	3.364	3.828	4.391	1.2553	1.1843	1.0914	1.1783	0.9318	0.499	0.8941	0.2285	0.517	0.54	0.505	0.478
987	956	Transcriptional regulator	Ing4; Ing4	ING4; ING4 iso2	§127, §129; §127, §129	inhibitor of growth protein 4	Q8C0D7; Q8C0D7-2	http://www.phosphosite.org/proteinAction.do?id=10980&showAllSites=true	29; 28	DYDSSSSK*GKKKGRT, DSSSSKGK*KKGRTQK; DYDSSSSK*GKKSRTQ, DSSSSKGK*KSRTQKE	QIESSDYDSSSSK*GK*K	3	610.618	2966	2901	2862	2891	2996	2924	3221	3307	2964	2925	2871	2910	3013	2943	3228	3294	3.577	3.478	4.445	3.896	4.192	3.574	4.801	3.956	0.5531	0.1804	0.5498	0.3831	0.2214	0.1011	0.3962	0.0776	0.42	0.377	0.37	0.427
988	957	Transcriptional regulator	Ing4	ING4 iso2	§127, §129, 130	inhibitor of growth protein 4	Q8C0D7-2	http://www.phosphosite.org/proteinAction.do?id=5355605&showAllSites=true	28	DYDSSSSK*GKKSRTQ, DSSSSKGK*KSRTQKE, SSSSKGKK*SRTQKEK	QIESSDYDSSSSK*GK*K*SR	3	705.666				3541			3867	3973				3533			3857	3960				2.831			3.101	2.284				1.2931			1.1853	1.2487				0.231
989	958	Transcriptional regulator	Ing4; Ing4	ING4; ING4 iso2	§146, §148; §145, §147	inhibitor of growth protein 4	Q8C0D7; Q8C0D7-2	http://www.phosphosite.org/proteinAction.do?id=10980&showAllSites=true	29; 28	KAARARSK*GKNSDEE, ARARSKGK*NSDEEAP; KAARARSK*GKNSDEE, ARARSKGK*NSDEEAP	SK*GK*NSDEEAPK	2	687.331	1713	1680	1675	1668	1734	1653			1719	1667	1660	1676	1732	1658			3.394	3.525	3.47	3.237	3.222	3.305			-2.2549	-2.2112	-2.1653	-2.316	-2.3633	-2.4194			0.291	0.321	0.348	0.24
990	959	Transcriptional regulator	Ing4; Ing4	ING4; ING4 iso2	§146, §148, §156; §145, §147, §155	inhibitor of growth protein 4	Q8C0D7; Q8C0D7-2	http://www.phosphosite.org/proteinAction.do?id=10980&showAllSites=true	29; 28	KAARARSK*GKNSDEE, ARARSKGK*NSDEEAP, NSDEEAPK*AAQKKLK; KAARARSK*GKNSDEE, ARARSKGK*NSDEEAP, NSDEEAPK*AAQKKLK	SK*GK*NSDEEAPK*AAQK	2	907.45	2342	2286	2282	2330	2388	2318	2594	2660	2356	2299	2274	2344	2393	2324	2588	2665	4.062	3.431	3.343	2.793	3.712	3.32	3.344	3.3	0.6885	0.7265	1.457	0.6025	1.2552	0.651	0.7	0.1757	0.479	0.4	0.494	0.36
991	960	Transcriptional regulator	Ing4; Ing4	ING4; ING4 iso2	§146, §148, §156; §145, §147, §155	inhibitor of growth protein 4	Q8C0D7; Q8C0D7-2	http://www.phosphosite.org/proteinAction.do?id=10980&showAllSites=true	29; 28	KAARARSK*GKNSDEE, ARARSKGK*NSDEEAP, NSDEEAPK*AAQKKLK; KAARARSK*GKNSDEE, ARARSKGK*NSDEEAP, NSDEEAPK*AAQKKLK	SK*GK*NSDEEAPK*AAQK	3	605.302		2323	2310	2357	2378	2306				2310			2393	2324				3.098	2.917	2.731	3.753	3.298				0.2562	0.4315	0.4773	0.2899	0.6532				0.236	0.116	0.012
992	961	Transcriptional regulator	Ing4; Ing4	ING4; ING4 iso2	§146, §148, §156; §145, §147, §155	inhibitor of growth protein 4	Q8C0D7; Q8C0D7-2	http://www.phosphosite.org/proteinAction.do?id=10980&showAllSites=true	29; 28	KAARARSK*GKNSDEE, ARARSKGK*NSDEEAP, NSDEEAPK*AAQKKLK; KAARARSK*GKNSDEE, ARARSKGK*NSDEEAP, NSDEEAPK*AAQKKLK	SK*GK*NSDEEAPK*AAQKK	3	648.001	1821	1796	1755	1812	1856	1771		2071	1829		1759	1819	1864	1779		2070	3.657	2.679	3.463	3.081	3.436	4.075		3.512	0.5751	0.3521	0.7033	0.2996	0.6482	0.7769		-0.4862	0.257	0.18	0.243	0.27
993	962	Transcriptional regulator	Ing4; Ing4	ING4; ING4 iso2	§146, §148, §156, 160; §145, §147, §155, 159	inhibitor of growth protein 4	Q8C0D7; Q8C0D7-2	http://www.phosphosite.org/proteinAction.do?id=10980&showAllSites=true	29; 28	KAARARSK*GKNSDEE, ARARSKGK*NSDEEAP, NSDEEAPK*AAQKKLK, EAPKAAQK*KLKLVRT; KAARARSK*GKNSDEE, ARARSKGK*NSDEEAP, NSDEEAPK*AAQKKLK, EAPKAAQK*KLKLVRT	SK*GK*NSDEEAPK*AAQK*K	3	662.004	2960		2891					3287			2893					3294	2.761		3.21					3.661	0.8403		1.7112					1.4103	0.068		0.195
994	963	Transcriptional regulator	Ing4; Ing4	ING4; ING4 iso2	§146, §148, 160; §145, §147, 159	inhibitor of growth protein 4	Q8C0D7; Q8C0D7-2	http://www.phosphosite.org/proteinAction.do?id=10980&showAllSites=true	29; 28	KAARARSK*GKNSDEE, ARARSKGK*NSDEEAP, EAPKAAQK*KLKLVRT; KAARARSK*GKNSDEE, ARARSKGK*NSDEEAP, EAPKAAQK*KLKLVRT	SK*GK*NSDEEAPKAAQK*K	3	648.001							2020								2023								3.091								0.5648
995	964	Transcriptional regulator	Ing4; Ing4; Ing5	ING4; ING4 iso2; ING5	§236; §235; §226	inhibitor of growth protein 4	Q8C0D7; Q8C0D7-2; Q9D8Y8	http://www.phosphosite.org/proteinAction.do?id=10980&showAllSites=true	29; 28; 28	LTTKPRGK*WFCPRCS; LTTKPRGK*WFCPRCS; LTTKPKGK*WFCPRCV	GK*WFCPR	2	496.742		6626	6631							6635	6630							2.365	2.453							0.1164	0.1879							0.183	0.238
996	965	Transcriptional regulator	Khdrbs3	KHDRBS3	§152	KH domain-containing, RNA-binding, signal transduction-associated protein 3	Q9R226	http://www.phosphosite.org/proteinAction.do?id=2819044&showAllSites=true	39	GHALEEIK*KFLIPDY	MGHALEEIK*K	2	599.318	3800	3680	3694	3704	3867		4069	4152	3788	3706	3723	3742	3840		4087	4179	2.888	2.695	2.833	2.566	2.736		2.757	2.751	-0.1236	-0.0751	0.0067	0.0175	-0.1202		0.2263	0.3365	0.111	0.187	0.108	0.166
997	966	Transcriptional regulator	Khdrbs3	KHDRBS3	§152	KH domain-containing, RNA-binding, signal transduction-associated protein 3	Q9R226	http://www.phosphosite.org/proteinAction.do?id=2819044&showAllSites=true	39	GHALEEIK*KFLIPDY	MGHALEEIK*K	3	399.881	3751		3681		3790		4077	4169	3788		3723		3829		4087	4190	2.879		2.535		2.681		3.233	3.082	-0.0067		0.2647		0.2964		-0.2705	-0.5895	0.021		0.024
998	967	Transcriptional regulator	Khdrbs3	KHDRBS3	§152	KH domain-containing, RNA-binding, signal transduction-associated protein 3	Q9R226	http://www.phosphosite.org/proteinAction.do?id=2819044&showAllSites=true	39	GHALEEIK*KFLIPDY	M#GHALEEIK*K	2	607.316		2950	2930				3285	3359		2925	2893				3283	3357		2.827	2.123				2.627	2.901		0.0539	0.2566				0.1643	0.1354		0.115	0.137
999	968	Transcriptional regulator	Mad2l2	MAD2L2	162	mitotic spindle assembly checkpoint protein MAD2B	Q9D752	http://www.phosphosite.org/proteinAction.do?id=10166283&showAllSites=true	24	AATRNMEK*IQVIKDF	EAATRNMEK*	2	546.261		2848																1.595								0.3672								0.001
1000	969	Transcriptional regulator	Mll2	MLL2	§3071	histone-lysine N-methyltransferase MLL2	Q6PDK2	http://www.phosphosite.org/proteinAction.do?id=11652&showAllSites=true	600	LVESANEK*AEREALL	LVESANEK*AER	2	644.331	2328	2282	2267	2315	2366	2299	2586	2657	2345	2288	2274	2322	2371	2313	2588	2665	3.252	3.054	3.168	3.329	3.268	3.337	3.215	3.322	-0.0586	-0.0144	0.732	0.7056	0.3522	0.7289	0.2916	-0.193	0.401	0.407	0.441	0.401
1001	970	Transcriptional regulator	Mll2	MLL2	§3147	histone-lysine N-methyltransferase MLL2	Q6PDK2	http://www.phosphosite.org/proteinAction.do?id=11652&showAllSites=true	600	TSLSLGLK*PGQTVMG	VEPAPPATSLSLGLK*PGQTVM#GTR	3	822.441		9093	9119	9137						9099	9127	9154						3	3.051	2.38						0.6215	0.6847	1.2871						0.13	0.22	0.085
1002	971	Transcriptional regulator	Mllt1	MLLT1	§246	protein ENL	Q9EPX7	http://www.phosphosite.org/proteinAction.do?id=17294&showAllSites=true	61	PVPKAAFK*EPKMALK	AAFK*EPK	2	416.732	2608	2565	2549	2589	2661	2590	2914		2633	2589	2570	2608	2679	2599	2940		1.844	1.942	1.994	2.006	2.104	2.365	2.167		-0.0628	-0.1001	0.2399	0.2471	0.2591	0.2279	0.002		0.062	0.099	0.164	0.15
1003	972	Transcriptional regulator	Myef2; Myef2	MYEF2; MYEF2 iso3	6; 6	myelin expression factor 2 isoform 1	Q8C854; Q8C854-3	http://www.phosphosite.org/proteinAction.do?id=18775&showAllSites=true	63; 62	--MADADK*SEAAAGD; --MADADK*SEAAAGD	ADADK*SEAAAGDDGSQQQPAEPR	3	786.014		2586	2558	2607	2675													2.351	2.551	1.975	2.449					1.01	1.2553	1.7413	0.8232					0.151	0.224	0.124
1004	973	Transcriptional regulator	Myst2	MYST2	§201	histone acetyltransferase MYST2 isoform 1	Q5SVQ0	http://www.phosphosite.org/proteinAction.do?id=8195&showAllSites=true	71	SLGHLTGK*HERHFSI	CPTPGCNSLGHLTGK*HER	3	688.323								4079																1.792								0.3225
1005	974	Transcriptional regulator	Myst2	MYST2	279	histone acetyltransferase MYST2 isoform 1	Q5SVQ0	http://www.phosphosite.org/proteinAction.do?id=8195&showAllSites=true	71	KRNSGLSK*EQKEKYM	NSGLSK*EQKEK	2	645.338				1442	1500	1436	1633							1427						2.204	2.056	3.601	2.587					-0.8185	0.8773	-0.4315	-0.7929					0.151
1006	975	Transcriptional regulator	Ncl	NCL	429	nucleolin	P09405	http://www.phosphosite.org/proteinAction.do?id=3053&showAllSites=true	77	RLVSQDGK*SKGIAYI	LVSQDGK*SK	2	502.275	1552			1527			1730	1777							1727	1775	1.767			1.469			2.037	1.928	-1.1069			0.4386			0.0639	-1.1149	0.006			0.072
1007	976	Transcriptional regulator	Ncl	NCL	§643	nucleolin	P09405	http://www.phosphosite.org/proteinAction.do?id=3053&showAllSites=true	77	KVTLDWAK*PKGEGGF	EAM#EDGEIDGNKVTLDWAK*PK	3	802.049	8311	8293	8279	8316	8434	8408	8822	8823	8304	8285	8280	8329	8457	8400	8839	8814	2.81	3.083	3.052	3.928	3.447	3.516	3.329	4.568	0.9974	1.1546	1.0273	1.4762	0.5257	0.4646	0.8281	0.4841	0.115	0.221	0.126	0.274
1008	977	Transcriptional regulator	Ncoa6	NCoA6	729	nuclear receptor coactivator 6 isoform 2	Q9JL19	http://www.phosphosite.org/proteinAction.do?id=11254&showAllSites=true	220	TNQMQGNK*AQFNSQN	QQNPM#IEQIMTNQM#QGNK*	4	552.503								9583																2.563								2.2733
1009	978	Transcriptional regulator	Ncor2; Ncor2; Ncor2	SMRT; SMRT iso2; SMRT iso5	§1983; §1843; §1984	nuclear receptor corepressor 2	Q9WU42; NP_001240833; AAD20944	http://www.phosphosite.org/proteinAction.do?id=6876&showAllSites=true	270; 254; 271	HREKTQSK*PFSIQEL; HREKTQSK*PFSIQEL; HREKTQSK*PFSIQEL	TQSK*PFSIQELELR	2	859.46	10797		10834	10845	11026	10961	11497	11416	10830		10856	10856	11017	10973	11490	11410	2.723		3.369	2.778	1.869	2.383	2.723	2.799	0.3038		0.7794	0.4517	0.004	0.2345	0.4796	-0.1322	0.329		0.323	0.284
1010	979	Transcriptional regulator	Nfrkb	NFRKB	§1234	nuclear factor related to kappa-B-binding protein	Q6PIJ4	http://www.phosphosite.org/proteinAction.do?id=11421&showAllSites=true	139	TKLIAGNK*PVSFLTA	LIAGNK*PVSFLTAQQLQQLQQQGQATQVR	3	1079.26		11419	11423	11493	11637	11560	12069	11996		11427	11428	11500	11665	11586	12087	12030		2.779	3.057	3.276	2.105	3.98	2.408	4.421		1.4817	1.2351	1.2907	1.1362	1.2107	0.7211	1.207		0.292	0.317	0.395
1011	980	Transcriptional regulator	Nfrkb	NFRKB	§1234	nuclear factor related to kappa-B-binding protein	Q6PIJ4	http://www.phosphosite.org/proteinAction.do?id=11421&showAllSites=true	139	TKLIAGNK*PVSFLTA	LIAGNK*PVSFLTAQQLQQLQQQGQATQVR	4	809.694	11424	11426	11429	11517	11642	11595	12100	12010	11416	11438	11450	11511	11665	11597	12065	12030	5.05	5.021	5.428	4.473	5.425	4.809	3.748	4.156	0.494	0.2727	1.4162	0.8682	0.5002	1.2861	-0.3197	-0.075	0.357	0.41	0.439	0.277
1012	981	Transcriptional regulator	Nfrkb	NFRKB	§1234	nuclear factor related to kappa-B-binding protein	Q6PIJ4	http://www.phosphosite.org/proteinAction.do?id=11421&showAllSites=true	139	TKLIAGNK*PVSFLTA	LIAGNK*PVSFLTAQQLQQLQQQGQATQVR	4	809.694						11610								11597								4.251								1.2923
1013	982	Transcriptional regulator	Nkrf	NKRF	509	NF-kappa-B-repressing factor	Q8BY02	http://www.phosphosite.org/proteinAction.do?id=14511&showAllSites=true	78	EAAGEAVK*TLKKTQP	EAVK*TLK	2	415.753				4420																1.738								0.3876								0.021
1014	983	Transcriptional regulator	Prdm2	PRDM2	1427, 1432, 1434	retinoblastoma protein-binding zinc finger protein	A2A7B5	http://www.phosphosite.org/proteinAction.do?id=11649&showAllSites=true	187	VQKAILQK*NRSAKQK, LQKNRSAK*QKADLRD, KNRSAKQK*ADLRDTS	AILQK*NRSAK*QK*	3	504.295				11200																1.473								2.88								0.014
1015	984	Transcriptional regulator	Puf60	FIR	§459	poly(U)-binding-splicing factor PUF60 isoform c	Q3UEB3	http://www.phosphosite.org/proteinAction.do?id=3164&showAllSites=true	60	ARHMVMQK*LLRKQES	HM#VMQK*LLR	2	607.331								5367								5372								2.143								-0.0642
1016	985	Transcriptional regulator	Rai1	RAI1	1076	retinoic acid-induced protein 1	Q61818	http://www.phosphosite.org/proteinAction.do?id=5667&showAllSites=true	202	GKQRAAFK*SGKRVGK	AAFK*SGK	2	375.711				1705																1.493								0.4444								0.109
1017	986	Transcriptional regulator	Rai1	RAI1	1076, 1079	retinoic acid-induced protein 1	Q61818	http://www.phosphosite.org/proteinAction.do?id=5667&showAllSites=true	202	GKQRAAFK*SGKRVGK, RAAFKSGK*RVGKPSP	AAFK*SGK*R	2	474.767				2460	2544							2454	2525							1.95	1.992							0.3351	0.5955							0.126
1018	987	Transcriptional regulator	Rbm14	RBM14	135	RNA-binding protein 14	Q8C2Q3	http://www.phosphosite.org/proteinAction.do?id=6039&showAllSites=true	69	AIAQLNGK*EVKGKRI	AAIAQLNGK*EVK	2	642.37			4924	4938			5296	5411				4941			5297	5405			2.075	2.527			2.516	2.214			0.3584	0.3553			-0.1721	0.388			0.027	0.308
1019	988	Transcriptional regulator	Rsf1	HBXAP	§1053	remodeling and spacing factor 1	E9Q4Y2	http://www.phosphosite.org/proteinAction.do?id=11394&showAllSites=true	162	GGGVGRGK*DISTITG	GK*DISTITGHR	2	613.828	4048	3966		3957		3985	4319	4433	4025	3942		3962		3980	4318	4419	3.071	2.869		2.626		2.469	3.495	3.086	-0.1985	-0.1635		0.1268		0.0085	-0.0713	-0.4863	0.238	0.163		0.326
1020	989	Transcriptional regulator	Rsf1	HBXAP	§1053	remodeling and spacing factor 1	E9Q4Y2	http://www.phosphosite.org/proteinAction.do?id=11394&showAllSites=true	162	GGGVGRGK*DISTITG	GK*DISTITGHR	2	613.828	4022	3935						4429	4025	3942						4419	2.568	2.348						2.559	-0.1985	-0.1635						-0.5051	0.217	0.182
1021	990	Transcriptional regulator	Rsf1	HBXAP	§1053	remodeling and spacing factor 1	E9Q4Y2	http://www.phosphosite.org/proteinAction.do?id=11394&showAllSites=true	162	GGGVGRGK*DISTITG	GK*DISTITGHR	3	409.554	4015	3988	3939	3974	4104	4015	4308	4431	4025	3942	3916	3962	4058	3980	4307	4419	3.36	3.284	3.229	3.573	2.766	3.125	3.619	3.273	0.3314	0.3028	0.6477	0.7594	0.6126	0.6746	0.3998	0.0037	0.182	0.335	0.356	0.305
1022	991	Transcriptional regulator	Rsf1	HBXAP	§1053	remodeling and spacing factor 1	E9Q4Y2	http://www.phosphosite.org/proteinAction.do?id=11394&showAllSites=true	162	GGGVGRGK*DISTITG	GK*DISTITGHR	3	409.554	4011						4305		4025						4307		2.312						2.37		0.3314						0.4072		0.187
1023	992	Transcriptional regulator	Rsf1	HBXAP	§1064	remodeling and spacing factor 1	E9Q4Y2	http://www.phosphosite.org/proteinAction.do?id=11394&showAllSites=true	162	TITGHRGK*DISTILD	GK*DISTILDEER	2	709.362	8669	8618	8614	8651	8771	8757	9221	9226	8700	8626	8643	8692	8798	8774	9246	9243	3.444	3.414	3.426	3.74	3.73	3.379	3.52	3.25	0.4841	0.4961	0.5539	0.5927	0.3635	0.4227	0.3423	0.0679	0.334	0.319	0.372	0.343
1024	993	Transcriptional regulator	Rsf1	HBXAP	§1064	remodeling and spacing factor 1	E9Q4Y2	http://www.phosphosite.org/proteinAction.do?id=11394&showAllSites=true	162	TITGHRGK*DISTILD	GK*DISTILDEERK	2	773.41	7219	7161	7156	7212	7307	7276	7657	7729	7248	7207	7202	7240	7324	7311	7684	7758	4.317	4.115	4.087	4.477	4.511	4.134	4.206	4.265	0.2868	0.2894	0.6296	0.4873	0.1315	0.4627	0.259	0.05	0.33	0.33	0.365	0.424
1025	994	Transcriptional regulator	Rsf1	HBXAP	§1064	remodeling and spacing factor 1	E9Q4Y2	http://www.phosphosite.org/proteinAction.do?id=11394&showAllSites=true	162	TITGHRGK*DISTILD	GK*DISTILDEERK	2	773.41		7244								7207								3.995								0.3075								0.374
1026	995	Transcriptional regulator	Rsf1	HBXAP	§1064	remodeling and spacing factor 1	E9Q4Y2	http://www.phosphosite.org/proteinAction.do?id=11394&showAllSites=true	162	TITGHRGK*DISTILD	GK*DISTILDEERK	3	515.942	7209	7230	7225	7189	7290	7261	7639	7707	7248	7207	7191	7240	7324	7311	7684	7758	2.812	3.364	3.137	3.591	2.774	3.046	2.597	3.429	-0.0153	-0.0063	0.257	0.1917	-0.0108	0.1018	0.1153	-0.3006	0.294	0.293	0.222	0.3
1027	996	Transcriptional regulator	Rsf1	HBXAP	§1064	remodeling and spacing factor 1	E9Q4Y2	http://www.phosphosite.org/proteinAction.do?id=11394&showAllSites=true	162	TITGHRGK*DISTILD	GK*DISTILDEERK	3	515.942		7147			7380	7359				7207								2.751			2.221	2.36				-0.0127			-0.0056	0.0979				0.098
1028	997	Transcriptional regulator	Safb	SAFB1	§629	scaffold attachment factor B	NP_001156772	http://www.phosphosite.org/proteinAction.do?id=11674&showAllSites=true	105	RSVVSFDK*VKESRKS	SVVSFDK*VK	2	525.795	6078																1.923								0.2557								0.014
1029	998	Transcriptional regulator	Sltm	SLTM	§1021	SAFB-like transcription modulator isoform a	Q8CH25	http://www.phosphosite.org/proteinAction.do?id=7679&showAllSites=true	117	RGSSSGFK*PFKSGPP	GSSSGFK*PFK	2	542.277	5640		5554	5606	5682	5642			5668		5585	5634	5699	5672			1.852		1.916	1.839	1.926	2.067			-0.0436		0.0441	0.3062	0.2573	0.3514			0.166		0.303	0.22
1030	999	Transcriptional regulator	Smarca4; Utrn	SMARCA4; utrophin	§455; 2307	transcription activator BRG1 isoform 1	Q3TKT4; O08614	http://www.phosphosite.org/proteinAction.do?id=11056&showAllSites=true	181; 393	REARITEK*LEKQQKI; VRTAITEK*LEKLKTQ	ITEK*LEK	2	451.763		2646		2665	2738	2678	2988											1.989		2.276	2.237	2.304	1.836			-0.0105		0.2643	-0.0083	0.2067	-0.1202			0.024		0.069
1031	1000	Transcriptional regulator	Taf1b	TAF1B	172, 178	TATA box-binding protein-associated factor RNA polymerase I subunit B	P97358	http://www.phosphosite.org/proteinAction.do?id=8502&showAllSites=true	68	QSDPQIPK*PFPVTKG, PKPFPVTK*GSPKSAS	IPK*PFPVTK*GSPK	2	740.432								14755																1.325								0.3525
1032	1001	Transcriptional regulator	Taf6	TAF6	169, 179, 181	transcription initiation factor TFIID subunit 6	Q62311	http://www.phosphosite.org/proteinAction.do?id=11361&showAllSites=true	73	TEPLKSAK*PGQEEDG, QEEDGPLK*GKGQGAA, EDGPLKGK*GQGAAAA	SAK*PGQEEDGPLK*GK*GQGAAAADGKGK	3	893.451					10295																2.335								-0.6406
1033	1002	Transcriptional regulator	Tbx20	TBX20	30	T-box transcription factor TBX20 isoform c	Q9ES03	http://www.phosphosite.org/proteinAction.do?id=25705975&showAllSites=true	49	LMSSGGPK*EKEAAEN	AFSIAALMSSGGPK*	2	689.855							8429																2.369								0.4024
1034	1003	Transcriptional regulator	Tceal3; Tceal5; Tceal6	TCEAL3; TCEAL5; TCEAL6	82; 82; 82	transcription elongation factor A protein-like 3	Q8R0A5; Q8CCT4; Q9DB24	http://www.phosphosite.org/proteinAction.do?id=17039&showAllSites=true	22; 22; 23	GKRQGESK*PDSQAKS; GKRQGESK*PDSQAKS; GKRQGESK*PDSQAKS	QGESK*PDSQAK	2	608.794			1424			1441					1418								2.752			2.744					0.2834			1.657					0.41
1035	1004	Transcriptional regulator	Tceal5	TCEAL5	11	transcription elongation factor A protein-like 5	Q8CCT4	http://www.phosphosite.org/proteinAction.do?id=3838400&showAllSites=true	22	FYKENEGK*PENKGRA	FYKENEGK*PENK	3	508.916		2023				2016								2017				1.931				2.714				-0.4585				1.0218				0.041
1036	1005	Transcriptional regulator	Tceal5	TCEAL5	46	transcription elongation factor A protein-like 5	Q8CCT4	http://www.phosphosite.org/proteinAction.do?id=3838400&showAllSites=true	22	GKPARQGK*LEVEGGP	QGK*LEVEGGPGEQAQQK	2	912.958	4101																2.094								2.0556								0.325
1037	1006	Transcriptional regulator	Tceal5	TCEAL5	46	transcription elongation factor A protein-like 5	Q8CCT4	http://www.phosphosite.org/proteinAction.do?id=3838400&showAllSites=true	22	GKPARQGK*LEVEGGP	QGK*LEVEGGPGEQAQQK	3	608.974	4090	4020	3999	4022	4129	4065	4389		4091	4019	4015	4028	4124	4057	4373		3.343	3.588	3.466	3.905	3.754	3.539	4.361		0.5964	0.0709	0.7449	0.6967	0.9882	0.3224	2.8398		0.253	0.364	0.299	0.316
1038	1007	Transcriptional regulator	Thrap3	Trap150	§398	thyroid hormone receptor-associated protein 3	Q569Z6	http://www.phosphosite.org/proteinAction.do?id=8693&showAllSites=true	108	APKTDSEK*PFRGSQS	TDSEK*PFR	2	511.251					3492			3897					3521			3883					2.683			2.014					0.2559			-0.1132
1039	1008	Transcriptional regulator	Thrap3	Trap150	476	thyroid hormone receptor-associated protein 3	Q569Z6	http://www.phosphosite.org/proteinAction.do?id=8693&showAllSites=true	108	WESLHTGK*EKQRKAE	SGKWESLHTGK*EK	2	764.891	2604	2515	2514	2558	2622	2554	2873		2583	2527	2505	2553	2613	2544	2863		3.448	3.442	3.764	3.55	3.694	2.826	2.908		1.4576	0.9932	0.6727	0.7054	0.9697	0.3522	0.5033		0.405	0.366	0.46	0.379
1040	1009	Transcriptional regulator	Thrap3	Trap150	476	thyroid hormone receptor-associated protein 3	Q569Z6	http://www.phosphosite.org/proteinAction.do?id=8693&showAllSites=true	108	WESLHTGK*EKQRKAE	SGKWESLHTGK*EK	3	510.263						2557								2544								2.485								0.2011
1041	1010	Transcriptional regulator	Thrap3	Trap150	476	thyroid hormone receptor-associated protein 3	Q569Z6	http://www.phosphosite.org/proteinAction.do?id=8693&showAllSites=true	108	WESLHTGK*EKQRKAE	SGKWESLHTGK*EK	4	382.949	2597		2479	2515			2877	2939							2852	2948	2.288		2.641	2.232			2.463	2.73	0.22		0.4411	0.5098			0.0264	-0.7775	0.01		0.082	0.053
1042	1011	Transcriptional regulator	Thrap3	Trap150	476	thyroid hormone receptor-associated protein 3	Q569Z6	http://www.phosphosite.org/proteinAction.do?id=8693&showAllSites=true	108	WESLHTGK*EKQRKAE	WESLHTGK*EK	2	628.817							3439	3541								3521							1.578	1.84							-0.7993	-0.3975
1043	1012	Transcriptional regulator	Thrap3	Trap150	478	thyroid hormone receptor-associated protein 3	Q569Z6	http://www.phosphosite.org/proteinAction.do?id=8693&showAllSites=true	108	SLHTGKEK*QRKAEEM	SGKWESLHTGKEK*	3	510.263	2584		2462				2898		2583		2505				2863		2.268		2.124				2.617		-0.2647		0.0245				-0.141		0.071		0.132
1044	1013	Transcriptional regulator	Thrap3	Trap150	478	thyroid hormone receptor-associated protein 3	Q569Z6	http://www.phosphosite.org/proteinAction.do?id=8693&showAllSites=true	108	SLHTGKEK*QRKAEEM	SGKWESLHTGKEK*	3	510.263			2554																2.087								-0.058								0.1
1045	1014	Transcriptional regulator	Tigd4	TIGD4	208	tigger transposable element-derived protein 4	Q8BUZ3	http://www.phosphosite.org/proteinAction.do?id=5140189&showAllSites=true	57	GETCSVGK*LCKDRIT	MLPTNTFAFKGETCSVGK*	3	677.329	10189																2.174								-0.7014								0.036
1046	1015	Transcriptional regulator	Trerf1; Trerf1	TReP-132; TReP-132 iso2	646; 666	transcriptional-regulating factor 1 isoform 1	Q8BXJ2; Q8BXJ2-2	http://www.phosphosite.org/proteinAction.do?id=11177&showAllSites=true	132; 134	KHPPIAAK*VEEPLKN; KHPPIAAK*VEEPLKN	KHPPIAAK*VEEPLK	2	799.967	4359																1.659								0.5373								0.04
1047	1016	Transcriptional regulator	Trerf1; Trerf1	TReP-132; TReP-132 iso2	646; 666	transcriptional-regulating factor 1 isoform 1	Q8BXJ2; Q8BXJ2-2	http://www.phosphosite.org/proteinAction.do?id=11177&showAllSites=true	132; 134	KHPPIAAK*VEEPLKN; KHPPIAAK*VEEPLKN	KHPPIAAK*VEEPLK	3	533.647	4414	4273	4337	4361	4467	4303	4638	4695	4355	4305	4290	4314	4421	4343	4681	4748	3.938	4.38	4.075	4.599	4.214	4.018	4.125	4.576	0.0257	-0.0606	0.0751	0.122	0.187	0.1345	-0.1645	-0.3752	0.354	0.383	0.377	0.401
1048	1017	Transcriptional regulator	Trerf1; Trerf1	TReP-132; TReP-132 iso2	646; 666	transcriptional-regulating factor 1 isoform 1	Q8BXJ2; Q8BXJ2-2	http://www.phosphosite.org/proteinAction.do?id=11177&showAllSites=true	132; 134	KHPPIAAK*VEEPLKN; KHPPIAAK*VEEPLKN	KHPPIAAK*VEEPLK	3	533.647	4228	4363	4249	4272	4379	4401	4515	4782	4355	4305	4290	4314	4421	4343	4681	4748	3.787	4.314	4.072	4.016	3.968	3.769	2.583	3.806	-0.0212	-0.0694	0.0663	0.1207	0.2208	0.1151	-0.1394	-0.3546	0.24	0.365	0.387	0.401
1049	1018	Transcriptional regulator	Trerf1; Trerf1	TReP-132; TReP-132 iso2	646; 666	transcriptional-regulating factor 1 isoform 1	Q8BXJ2; Q8BXJ2-2	http://www.phosphosite.org/proteinAction.do?id=11177&showAllSites=true	132; 134	KHPPIAAK*VEEPLKN; KHPPIAAK*VEEPLKN	KHPPIAAK*VEEPLK	3	533.647	4323		4167	4179	4288	4221		4603	4355		4290	4314	4421	4343		4748	3.51		2.41	2.232	2.713	2.669		2.732	0.0219		0.1633	0.3353	0.3465	0.1845		-0.2045	0.38		0.279	0.131
1050	1019	Transcriptional regulator	Trerf1; Trerf1	TReP-132; TReP-132 iso2	646; 666	transcriptional-regulating factor 1 isoform 1	Q8BXJ2; Q8BXJ2-2	http://www.phosphosite.org/proteinAction.do?id=11177&showAllSites=true	132; 134	KHPPIAAK*VEEPLKN; KHPPIAAK*VEEPLKN	KHPPIAAK*VEEPLK	3	533.647	4238								4355								2.98								0.0213								0.22
1051	1020	Transcriptional regulator	Trerf1; Trerf1	TReP-132; TReP-132 iso2	646; 666	transcriptional-regulating factor 1 isoform 1	Q8BXJ2; Q8BXJ2-2	http://www.phosphosite.org/proteinAction.do?id=11177&showAllSites=true	132; 134	KHPPIAAK*VEEPLKN; KHPPIAAK*VEEPLKN	KHPPIAAK*VEEPLK	4	400.487							4644								4670								2.715								0.3753
1052	1021	Transcriptional regulator	Tshz1; Tshz3	TSHZ1; TSHZ3	§5; §5	teashirt homolog 1	Q5DTH5; Q8CGV9	http://www.phosphosite.org/proteinAction.do?id=1236692&showAllSites=true	119; 119	---MPRRK*QQAPRRS; ---MPRRK*QQAPRRA	RK*QQAPR	2	463.27							1657																1.44								-0.8153
1053	1022	Transcriptional regulator	Zfp418	ZNF418	192, 198	zinc finger protein 418	Q8BFS8	http://www.phosphosite.org/proteinAction.do?id=1180001&showAllSites=true	75	QNQIKCRK*AFHSEKN, RKAFHSEK*NNSKSDK	K*AFHSEK*NNSKSDK	3	568.616						9681																1.861								2.7007
1054	1023	Transcriptional regulator	Zfp758; Zfp942; LOC100047293	Zfp758; Zfp942; LOC100047293	393; 399; 427	zinc finger protein 758	NP_663459; NP_001185977; XP_001477861	http://www.ncbi.nlm.nih.gov/entrez/query.fcgi?db=protein&cmd=search&term=NP_663459	65; 57; 55	SDLRSHKK*IHTGEKP; CNLIIHQK*IHTGEKP; SHRNIHQK*IHTGEKP	K*IHTGEKPYKCSECDKCFTHK	3	899.086							5811																2.086								-2.0907
1055	1024	Transcriptional regulator	Zim1	Zim1	241, 246	zinc finger, imprinted 1	Q9WVI0	http://www.phosphosite.org/proteinAction.do?id=20125&showAllSites=true	65	SEKPTSGK*DVEGKPQ, SGKDVEGK*PQTMRSS	QSAPSEKPTSGK*DVEGK*PQTMR	4	611.304				9156																2.47								1.7839								0.073
1056	Translation
1057	1025	Translation	Eef1a1	eEF1A1	§179	elongation factor 1-alpha 1	P10126	http://www.phosphosite.org/proteinAction.do?id=3354&showAllSites=true	50	KEVSTYIK*KIGYNPD	EVSTYIK*K	2	505.282			3472				3844	3929			3492				3879	3949			2.143				1.562	1.719			0.288				-0.0716	-0.2925			0.255
1058	1026	Translation	Eef1a1; Eef1a2	eEF1A1; eEF1A2	§41; §41	elongation factor 1-alpha 1	P10126; P27706	http://www.phosphosite.org/proteinAction.do?id=3354&showAllSites=true	50; 50	IDKRTIEK*FEKEAAE; IDKRTIEK*FEKEAAE	TIEK*FEK	2	468.755							4182																1.546								-0.167
1059	1027	Translation	Eef1a1; Eef1a2	eEF1A1; eEF1A2	§41; §41	elongation factor 1-alpha 1	P10126; P27706	http://www.phosphosite.org/proteinAction.do?id=3354&showAllSites=true	50; 50	IDKRTIEK*FEKEAAE; IDKRTIEK*FEKEAAE	TIEK*FEKEAAEMGK	3	551.611		7400				7506	7881	7918						7509	7893	7945		1.86				2.034	2.599	2.653		0.4232				0.9853	0.5944	0.0505		0.033
1060	1028	Translation	Eef1a1; Eef1a2	eEF1A1; eEF1A2	§41; §41	elongation factor 1-alpha 1	P10126; P27706	http://www.phosphosite.org/proteinAction.do?id=3354&showAllSites=true	50; 50	IDKRTIEK*FEKEAAE; IDKRTIEK*FEKEAAE	TIEK*FEKEAAEM#GK	3	556.943				5058		5121	5458					5062		5111						2.41		2.558	2.091					0.3822		0.275	0.1677					0.196
1061	1029	Translation	Eef1a1; Eef1a2	eEF1A1; eEF1A2	§44; §44	elongation factor 1-alpha 1	P10126; P27706	http://www.phosphosite.org/proteinAction.do?id=3354&showAllSites=true	50; 50	RTIEKFEK*EAAEMGK; RTIEKFEK*EAAEMGK	TIEKFEK*EAAEM#GK	3	556.943			5020		5184						5046		5185						2.405		3.128						0.4218		0.2582						0.161
1062	1030	Translation	Eef1g	eEF1G	§136	elongation factor 1-gamma	Q9D8N0	http://www.phosphosite.org/proteinAction.do?id=9165&showAllSites=true	50	ENAKEEVK*RILGLLD	QATENAKEEVK*R	2	722.873							1746																1.509								1.639
1063	1031	Translation	Eef1g	eEF1G	§434	elongation factor 1-gamma	Q9D8N0	http://www.phosphosite.org/proteinAction.do?id=9165&showAllSites=true	50	GKAVNQGK*IFK----	AVNQGK*IFK	2	523.803	4411	4374	4368	4392	4501	4421	4781	4859	4410	4338	4323	4347	4465	4387	4747	4847	2.376	2.157	2.157	1.98	2.182	2.498	2.329	2.46	-0.0632	-0.0154	0.0629	-0.025	0.0668	-0.0106	-0.2954	-0.3938	0.138	0.113	0.098	0.119
1064	1032	Translation	Eef2	eEF-2	§272	elongation factor 2	P58252	http://www.phosphosite.org/proteinAction.do?id=1537&showAllSites=true	95	YFDPANGK*FSKSANS	YFDPANGK*FSK	2	658.319	6775	6782	6700	6761	6869	6833	7213	7289	6831	6734	6718	6778	6895	6849	7233	7318	2.248	2.858	2.879	2.683	2.659	2.837	1.985	3.05	0.2543	0.293	0.2482	0.5674	0.3508	0.3211	0.2862	-0.0277	0.209	0.35	0.241	0.404
1065	1033	Translation	Eef2	eEF-2	§272	elongation factor 2	P58252	http://www.phosphosite.org/proteinAction.do?id=1537&showAllSites=true	95	YFDPANGK*FSKSANS	YFDPANGK*FSK	2	658.319	6870	6700							6831	6734							2.037	2.076							0.3037	0.344							0.119	0.251
1066	1034	Translation	Eif3h	eIF3S3	§24, §26	eukaryotic translation initiation factor 3 subunit H	Q91WK2	http://www.phosphosite.org/proteinAction.do?id=17304&showAllSites=true	40	SAGGAVGK*GKGKGGS, GGAVGKGK*GKGGSGD	GAVGK*GK*GK	2	443.261					1985																2.82								0.0969
1067	1035	Translation	Fau	RPS30	§51	40S ribosomal protein S30 precursor	P62862	http://www.phosphosite.org/proteinAction.do?id=9219&showAllSites=true	7	NVVPTFGK*KKGPNAN	FVNVVPTFGK*K	2	639.366	8866	8836	8820	8891	8975	8962	9413	9399	8854	8802	8830	8868	8974	8950	9389	9364	2.764	2.504	2.735	2.549	2.689	2.931	2.514	2.822	0.1675	0.2748	0.238	0.4814	0.2067	0.2106	0.2865	-0.1596	0.258	0.236	0.235	0.236
[truncated: 141 more rows]
[truncated: 21 more columns]

## Sheet: Summary
MIELCAREK ET AL. ACETYLSCAN® RESULTS
Supplemental Table #S1: Mouse Brain; Trypsin Digest; Acetyl-lysine Antibody (#9895)
[truncated: 824 more rows]
[truncated: 7 more columns]

## Sheet: Fold Change by Protein Type
MIELCAREK ET AL. ACETYLSCAN® RESULTS
[truncated: 16 more rows]
[truncated: 7 more columns]
